# Supplementary material
Source: Research Square preprint supplement (doi:10.21203/rs.3.rs-9315249/v1)
Supplement: Supplementary file 1 [file 1f81f8d523b36e3928039bef.xlsx]

## Sheet: Sheet1
Supplemental Data 3. Stages and tissues used for qRT-PCR. The Zadoks growth scale41 was used to code developmental stages.
Stage	Tissue	Sample	Description
Z32	Whole spike	10 spikes	Second node detectable, spike 0.5-0.8 cm long, second to the last leaf just visible
Z36	Whole spike	5 spikes	Sixth node detectable, spike 1.5-2.0 cm long
Yellow anther (YA)	Glume	2.5 spikes	Spike 2-3 mm wide. Tip of the spike is around 2 cm above the second to the last leaf ligule or 5 cm below the flag leaf ligule
Anthesis	Glume	1 spike	Anthers protrude from flowers
7 days after anthesis (7 DAA)	Glume	1 spike	7 days after anthesis (7 DAA)
4th leaf visible (4-inch long)	Leaf	3 inches	Tip of the 4th leaf when it is 4 inches long
Z32	Stem	1 inch	Stem below the spike
Anthesis	Ovary	2 spikes	Anthers protrude from flowers
