# Supplementary material
Source: Research Square preprint supplement (doi:10.21203/rs.3.rs-9315249/v1)
Supplement: Supplementary file 1 [file 4da43dc98a39a439a090f4dc.docx]

**Supplementary Information**

**Xiao et al**


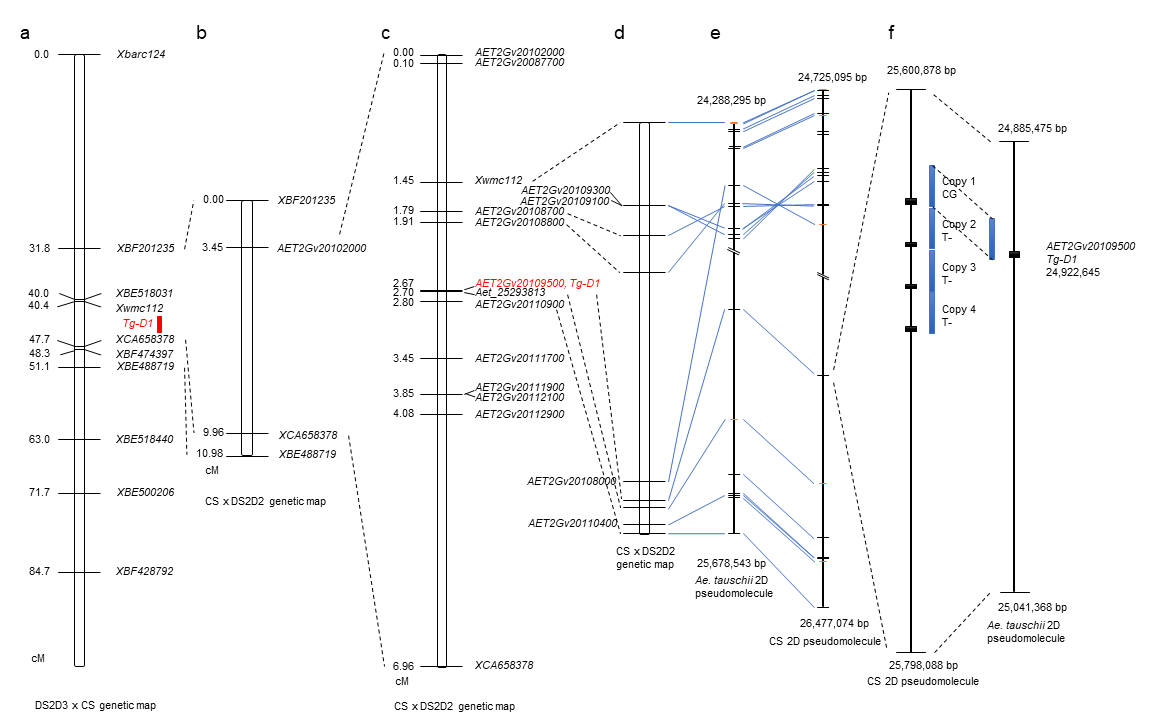


**Supplementary Fig1. High-resolution mapping of *Tg-D1*.** **a** DS2D3 (=DS2D3) × CS map of the *Tg-D1* region1. **b-d** Genetic map based on 2,849 CS × DS2D2 (=DS2D2) F2 plants. **b** We selected ESTs, *XBF201235*, *XCA658378,* and *XBE488719,* from the DS2D3 × CS map and gene *AET2Gv20102000* from the *Ae. tauschii* Aet v4.0 pseudomolecule 2D2 and screened with them the F2 plants for crossovers in the vicinity of *Tg-D1.* We obtained 307 F2 plantsrecombined in the interval *AET2Gv20102000-XCA658378*. **c** We developed 11 markers within the *AET2Gv20102000-XCA658378* interval, genotyped the 307 F2 plants, and constructed a map. **d** We randomly selected 50 of the 307 F2 plants and produced F2:3 families. We phenotyped glume tenacity in the F3 families and inferred glume tenacity genotypes in the 50 F2 plants, which narrowed down the candidate region between *Xwmc112* and *AET2Gv20110900*. We then selected an additional 45 F2 plants with crossovers within or close to this interval and repeated the mapping process. *Tg-D1* co-segregated with a marker derived from gene *AET2Gv20109500* in all 95 families (**Supplementary Data 1**). **e** We aligned genetic interval *Xwmc112*-*AET2Gv20110900* on the *Ae. tauschii* Aet v4.02 2D pseudomolecule. We encountered an inversion of interval *AET2Gv20108000-AET2Gv20109300* and a gap between the inverted region and *AET2Gv20109500.* As the order of genes on the CS IWGSC RefSeq v2.1 pseudomolecule 2D3 was the same as that on the genetic map, we concluded that the inversion was caused by erroneous scaffold orientation in Aet v4.02. The only high-confidence (HC) gene annotated between *AET2Gv20108000* and *Aet_25293813* was *AET2Gv20109500.* **f** A 56.79-kb gap in the CS pseudomolecule was bridged with BAC 83J08 (left) and *Ae. tauschii* Aet v4.0 pseudomolecule 2D sequence (right). We found a tandem of four 14-kb duplications (blue vertical rectangles), each containing a homologue of *AET2Gv20109500* (black horizontal rectangles) in the BAC clone. The bases at positions 1649-1650 bp in the coding sequence (CDS) are shown.

**gRNA #58 #94 #52 #90**

+1

ATGTCGGCGCCGGAGGAGGGCGACGCCGCCGCCTCGGGATCGTCGGCGCCGCCGCCCCCCGCGCCCGCGCCCGCGCCGCCGCCGATGGCCATGGCGGAGCCGGGCGCAATGGGGCCCGAGGAGGCCGCCGCCAGGAAGCGCTACGAGGCGCTGATGCAGGTGCGGGCCAAGGCGCTCAAGGGCAAGGGCGCCTGGTACTGGGGCCACCTGGAGCCCGTCCTCGTGCCGCCGCCGGCCTCCGGGGCGCCCCCCAAGGCCGCCCGCCTCCGATGCGCGCTCTGCGCCGCGACGTTCTCCGCCTCCAACCCCTCCCGCACCGCCACCGAGCACCTCAAGCGCGGCGCCTGCCCTAATTTCGCGGCGGCGCAGGGCGCGCCGCCGCCGCCGCCGCCCCCGCCCCCGCCGCAGAATCAGCATCAGCAGTTGCAGCTCGTCGCCGTCTCGTCCCCCGCCTCATCGATCGTGCCCATCTCCTCCATCCCCCCGTCGTCCTCGTCCGCGTCGCAGCGCCGCCACTCCACCGGCGGCGGCGGCGGCGGCGGCCGCAAGCGCCACGCGCTCGCCGCGGCCTACGCGTCCGTCGAGGCCGCCTCGCACCAGCACCACGTCATGGTCGCCGACCCGGCCGGGTACTCCCCGACGCCGCCCACCCCGCCCGGGATGCCCGCGCCCAGGCAGCTGCTCTCCGGCGGCCGGGGCGACCTCGCCCCGCTCGCCATGCTGGAGGACAGCGTCAAGCGCCTCAAGTCGCCCTCGGCGTCGCCGGGCGCGATGCTGCCGCGGCCGCAGGCCGAGGCCGCGCTCTCGCTGCTCGCCGACTGGTTCCTCGAGTCGTCCGGCAGCGCCTCCCTCTCCGCGGTCGAGCACCCCAAGCTCAAGAACTTCCTGCGCCAGGTTGGGCTGCCGGAGATATCGCGGGCCGACCTCGCCGGCGCGCGCCTGGACGCGCGCTTCGCCGAGGCCCGCGCCGACGCCGCCGCGCGCTTCCGTGAGGCGCGGTTCTTCCAGCTCGCGGCCGACGGGCTGCGCGAGCAGGTGATCACCCTCTCTGTCAACCTCCCCAACGACACGTCCGTGTTCCACCGCGCCGTGCCCATGCCCGCGCCGGCGTCGGCGTCCCCTGACTACGCCCAGGAGCTGTTCCTGGACGCGGCATCGTCCGTCTCCGCCTCCTCCGGCGACATTCGGCATTGCGCCGGCATCGTCGCCGACCGCTTCGGCTCCAAGACTCTGCGTGATCTCGAGACCAAGCACCATTGGATGGTGAACCTTACCTGCCAAGTCCATGGCCTGTCCCGCTTGGTAAGCGACATGGCGCGCGAGCTCCCACTCTTCAACAACGCTGCGTCAAATTGCGCCAAGATCGCCAGCTACTTCAACACCACGCCCTCCGTGCGCGCGCTGCTGCACAAGCACCAAGTCCAGGAGCACGGGCACGCCTTCCTCCTCCCCATTGCCGCTCCGCCCTATAATGGCGGGGAATTTGCCGCTGCGTTCGTGATGCTCGAGAGCATCCTGACCTCGGCGCGGCCGCTCCAGCTCGCCGTGCTCGAGGAGTCCTACAAGGTGGTCTGCATCGACGACCCTGCCGCGAGGGAGATCGCGGCCATGGTGCAGAATGTGGCGTTCTGGACCGAGGTCGAGGCGACGCATTCGGTTGTGAAGATGATCATGGACTTGGTGAAGGAGATGGAGACCGAGAGGCCCCTGGTCGGGCAATGCCTGCCGCTCTGGGAGGACCTGCGCGGCAAGGTCAGAGGCTGGTGCCGGAAATTCAGCGTAGAAGAGGCCACTGCCATGAATGTGGTCGAGAGGAGGTTCAGGAAGAACTACCACCCGGCGTGGTCAGCGGCATTCATACTGGACCCATTGTATCTGATCAAGGACGCTGGCAGGAGGTACCTTCCACCGTTCAACTACTTGACGCCAGAGCAGGAGAAGGACGTGGACAGGCTGATCACGAGGCTGGTGTCGCCGGAGGAGGCGCACCTCGCGCTGATGGAGCTGATGAAATGGCGGTCGGAGGGGCTCGACCCATTGTACGCGCAGGCGGTGCAGGTCCGGCAGCCAGACCCGTCGACGGGGAAGATGAAGATAGCCAACAAGCAGAGCAGCCGTCTTGTCTGGGAGACATGTCTCAGTGAGTTCAAGTCACTTGGCAAAGTGGCCGTCAGGCTCATCTTCCTCCATGCAACCGCCAAGGGGTTCAAATGCACGCCGTCGATGACGCGGTGGCTCACCGCGCCGGGGAGCTCAGCCGGCAGCATCGGCCGGGCGCACCGGCTGGTGTTCATCGCGGCGAATTCGAAGCTGGAGAGGAGGGATTTCTCAAACGACGACGACAAGGACGTGGAGCTGCTGACAGAAGGGGACGACGACATGCTAACCGAGACTGGCAATGTGGATCCCTCCTCCTCCTCAGTGTAG

**Supplementary Fig. 2. CDS of gene *AET2Gv20109500* in *Ae. tauschii* acc. AL8/78***.* The CDS is comprised of 2,427 nucleotides. gRNAs we used for CRISPR editing of the gene are shown in green (- strand) and blue (+ strand). Their designations are above the sequence. The CG (red) nucleotide sequence at in positions 1,649 and 1,650 bp mutated in three of the four Chinese Spring *tg-D1* genes into T- by frameshift.

| **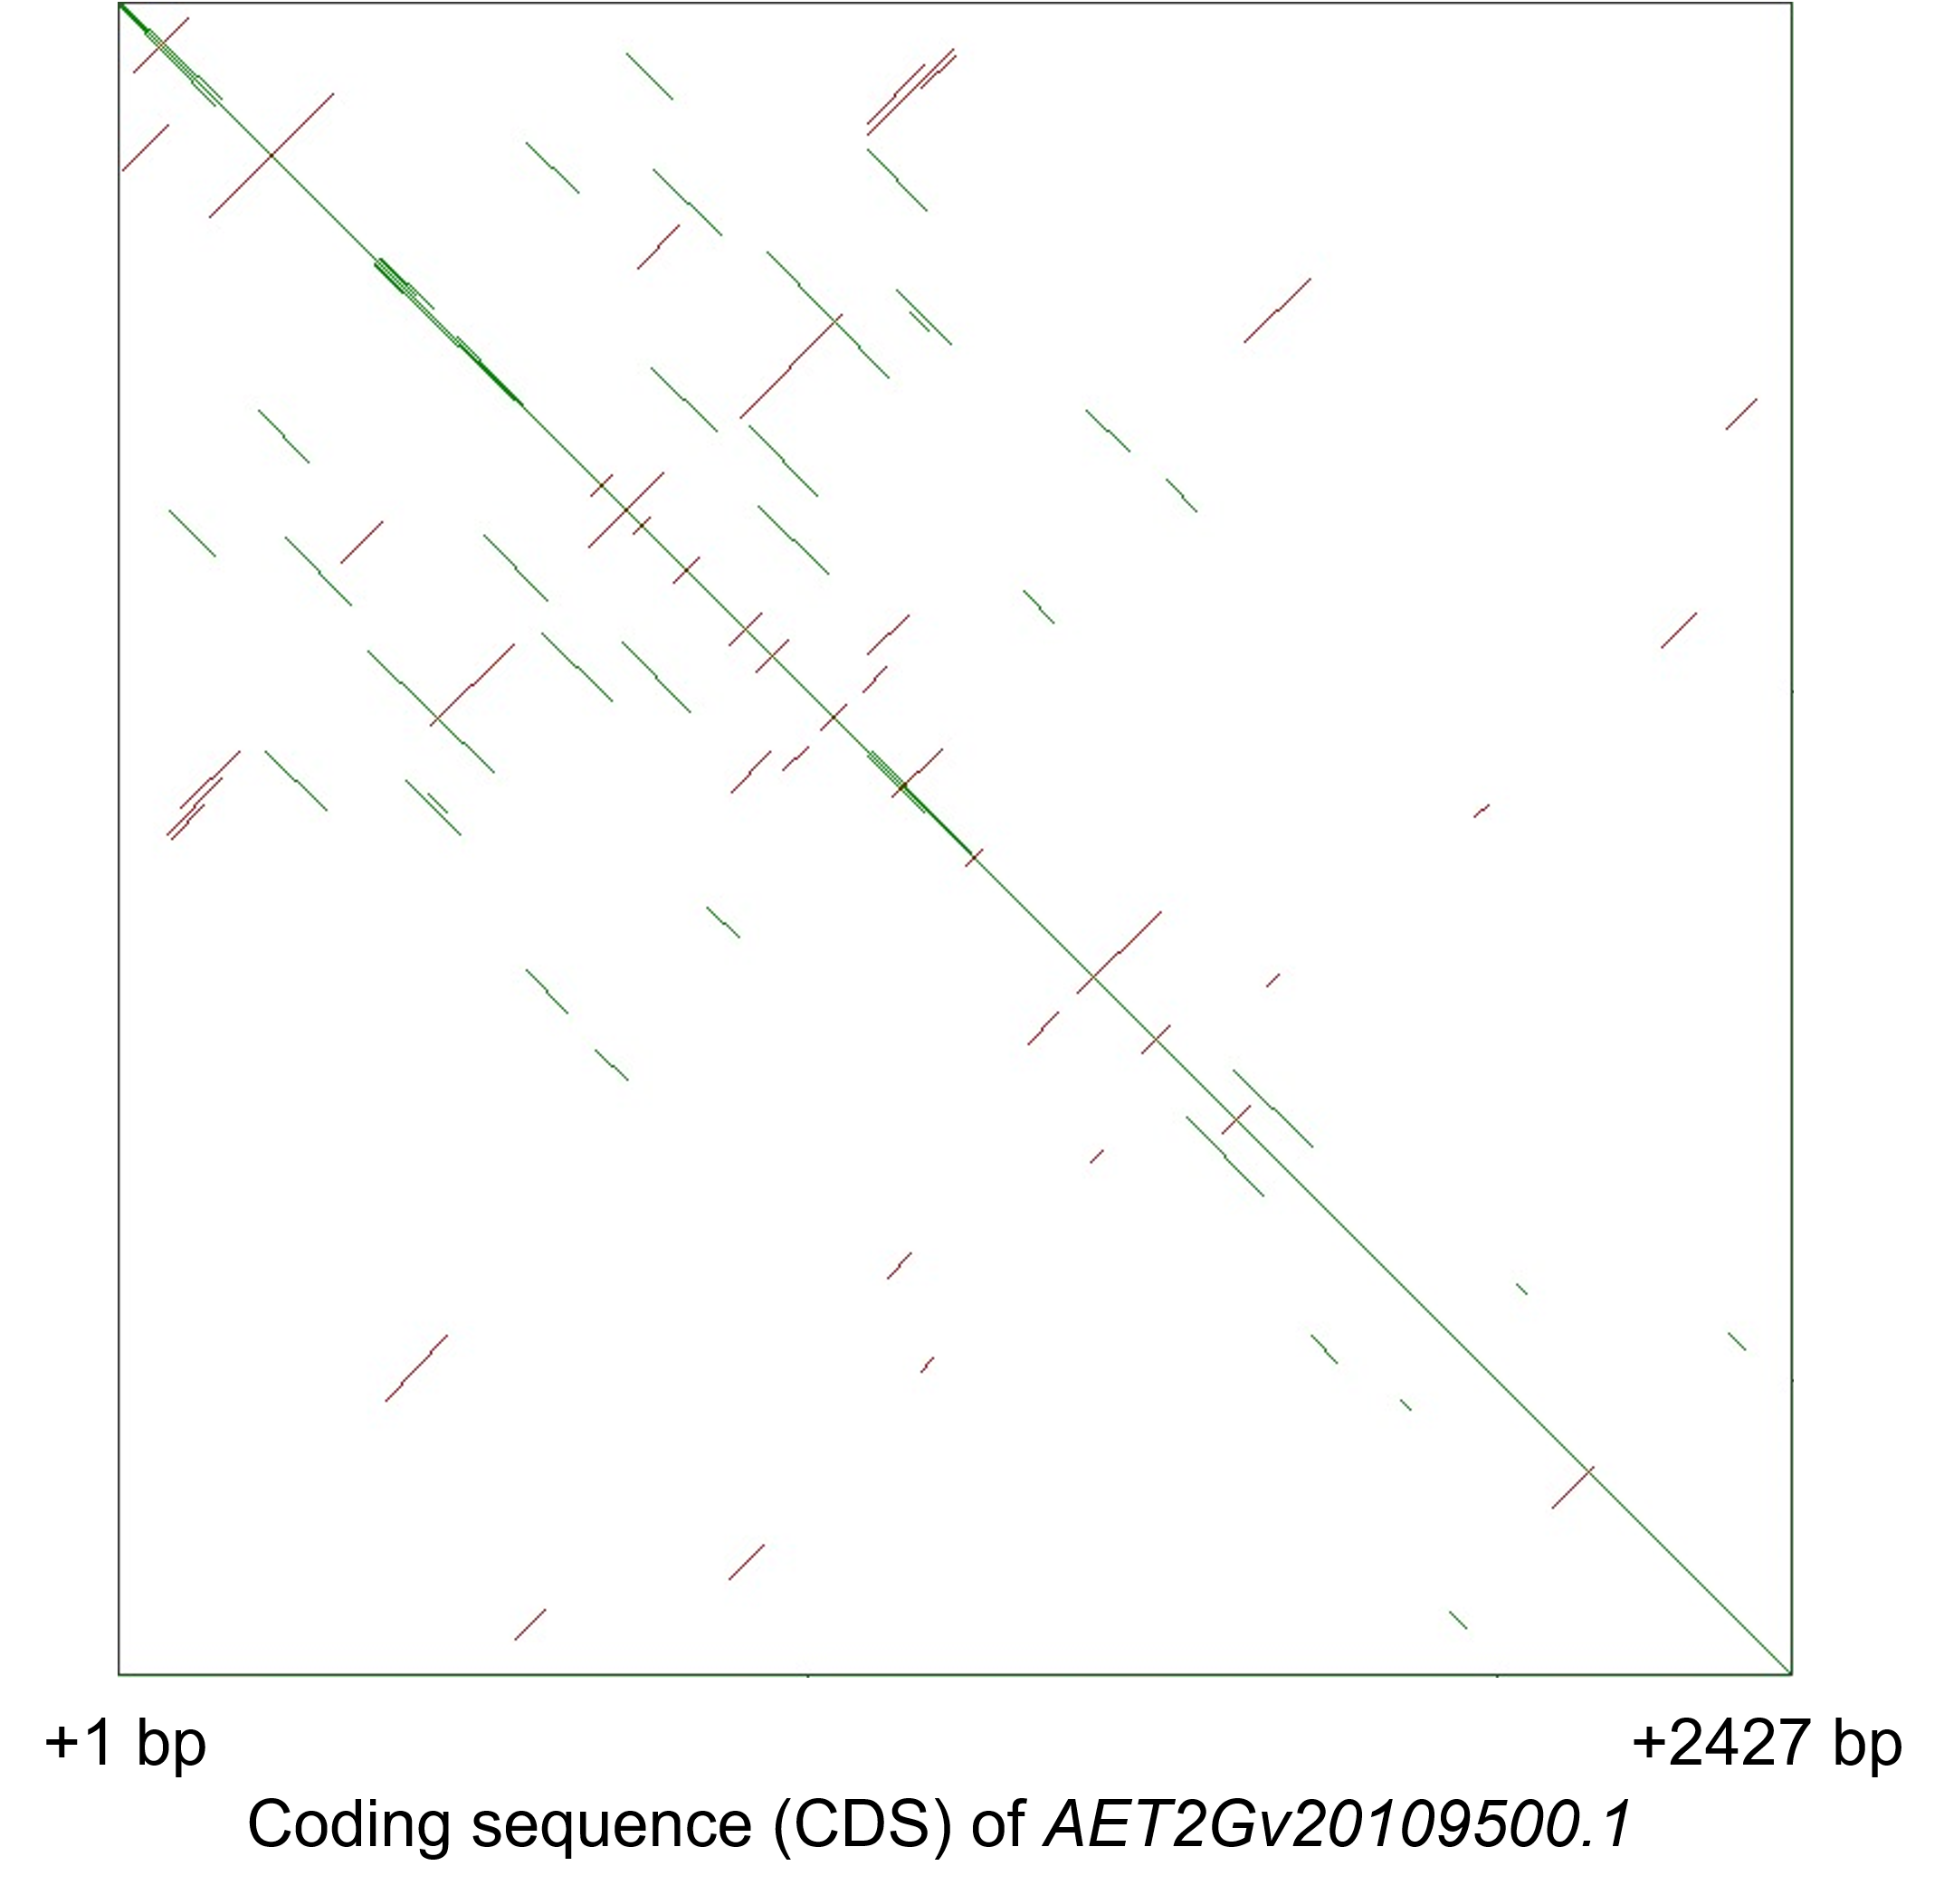** |
| --- |
| **Supplementary Fig. 3. Self-alignment dot plot of the *Ae. tauschii* transcript *AET2Gv20109500.1*.** Lines paralleling the diagonal are isodirectional sequences duplicated in other parts of the CDS and lines perpendicular to the diagonal are inverted duplicated sequences in other parts of the CDS. |

| **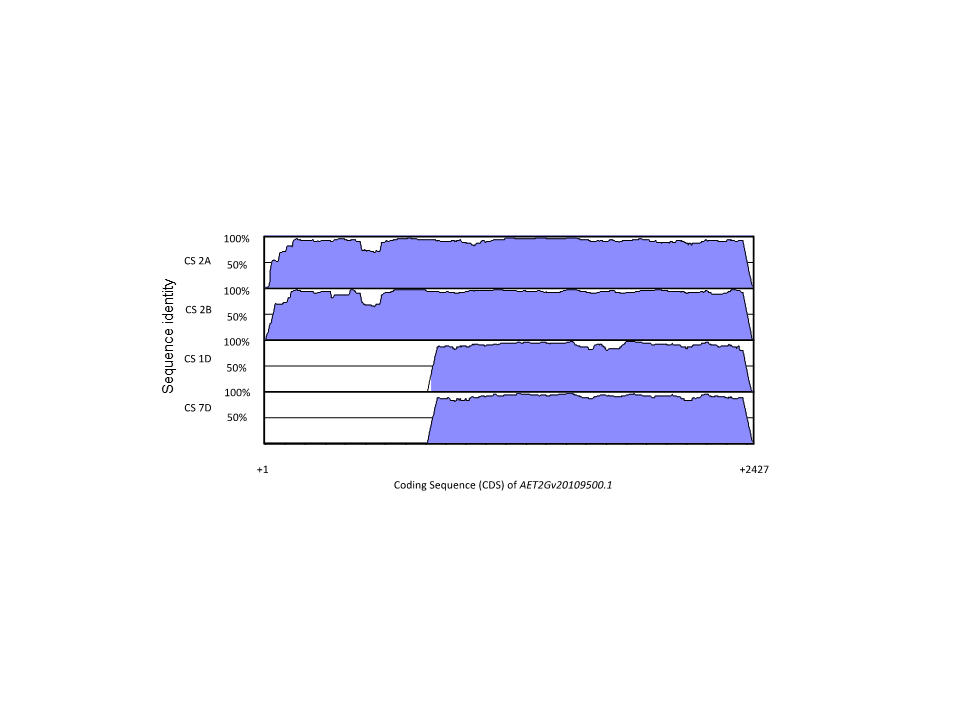** |
| --- |
| **Supplementary Fig. 4. VISTA plots between CDS of *Ae. tauschii* transcript *AET2G20109500.1* and orthologous sequences on chromosomes 2A and 2B and paralogous sequences on chromosomes 1D and 7D.** Purple shading indicates sequence identity in % of a window 100 bp long. |

|  |
| --- |
| **Supplementary Fig. 5. Spike density (spike length/spikelet number)** **in *T. aestivum* cv Fielder T1 transgenic families transformed with the *Ae. tauschii* *AET2Gv20109500* CDS.** Only families that segregated and had numbers of progeny sufficient for statistical analysis are shown. The FL1 to FL9 lines harbored the full-length CDS and PL line harbored a partial-length CDS. Within each family, white bars show mean spike density of progeny devoid of a transgene and black bars show mean density of siblings with a transgene. Means are above the bars. Mean density of all families including Fielder are at the extreme right. * indicates a significant difference (*α* = 0.05, *t*-test) within a family. The error bars represent standard errors calculated from least-square means. |

|  |
| --- |
| **Supplementary Fig. 6. Heading dates of *T. aestivum* cv Fielder T1 transgenic families transformed with the *Ae. tauschii* *AET2Gv20109500* CDS.** See Supplementary Fig. 5 for details. |

|  |
| --- |
| **Supplementary Fig. 7. Plant height of *T. aestivum* cv Fielder T1 transgenic families transformed with the *Ae. tauschii* *AET2Gv20109500* CDS.** See Supplementary Fig. 5 for details. |

|  |
| --- |
| **Supplementary Fig. 8. Numbers of spikes per plant of *T. aestivum* cv Fielder T1 transgenic families transformed with the *Ae. tauschii* *AET2Gv20109500* CDS**. See Supplementary Fig. 5 for details. |

|  |
| --- |
| **Supplementary Fig. 9.** **Spike density of durum wheat cv Kronos nonsense mutants.** Spike density was computed as spike length (cm)/spikelet number. **a** Mean spike density (white numbers) of Kronos and BC2F2 progeny of line 1 segregating for a *TraesCS2A02G059900* (2A-locus) nonsense mutation is in the left panel and BC1F2 progeny of line 2 segregating for a *TraesCS2B02G073600* (2B-locus) nonsense mutation is in the right panel. The bars show mean spike density of Kronos plants and plants homozygous for the WT allele (WT-homo.), heterozygous (Hetero.), and homozygous for a mutant allele (Mut-homo.). Genotypes sharing a common letter (above bars) are not significantly different from each other (*α*=0.05, Tukey’s test). Spike density of Kronos is shown as a reference and was not included into statistical analyses. **b** Mean spike density of F2 progeny of Kronos line 3. Mean density of homozygous WT plants, heterozygous, and homozygous for nonsense mutation in the 2A-gene disregarding the status of the 2B-gene is shown in the left panel and mean spike density of homozygous WT plants, heterozygous, and homozygous for nonsense mutation in the 2B-gene disregarding the status of the 2A-gene is shown in the right panel. |

|  |
| --- |
| **Supplementary Fig. 10. Spike morphology of durum wheat cv Kronos nonsense mutants.** We show spikes in the frontal view (left panels) and side view (right panels) of Kronos and progeny homozygous for the 2A-gene mutation, homozygous for the 2B-gene mutation, and homozygous for both mutations. Scale bars: 1 cm. |

|  |
| --- |
| **Supplementary Fig. 11**. **Plant height of durum wheat cv Kronos nonsense mutants.** See Supplementary Fig. 9for details. |

|  |
| --- |
| **Supplementary Fig. 12. Heading date of durum wheat cv Kronos nonsense mutants.** See Supplementary Fig. 9for details. |

|  |
| --- |
| **Supplementary Fig. 13. Number of spikes per plant of durum wheat cv Kronos nonsense mutants.** See Supplementary Fig. 9for details. |

| 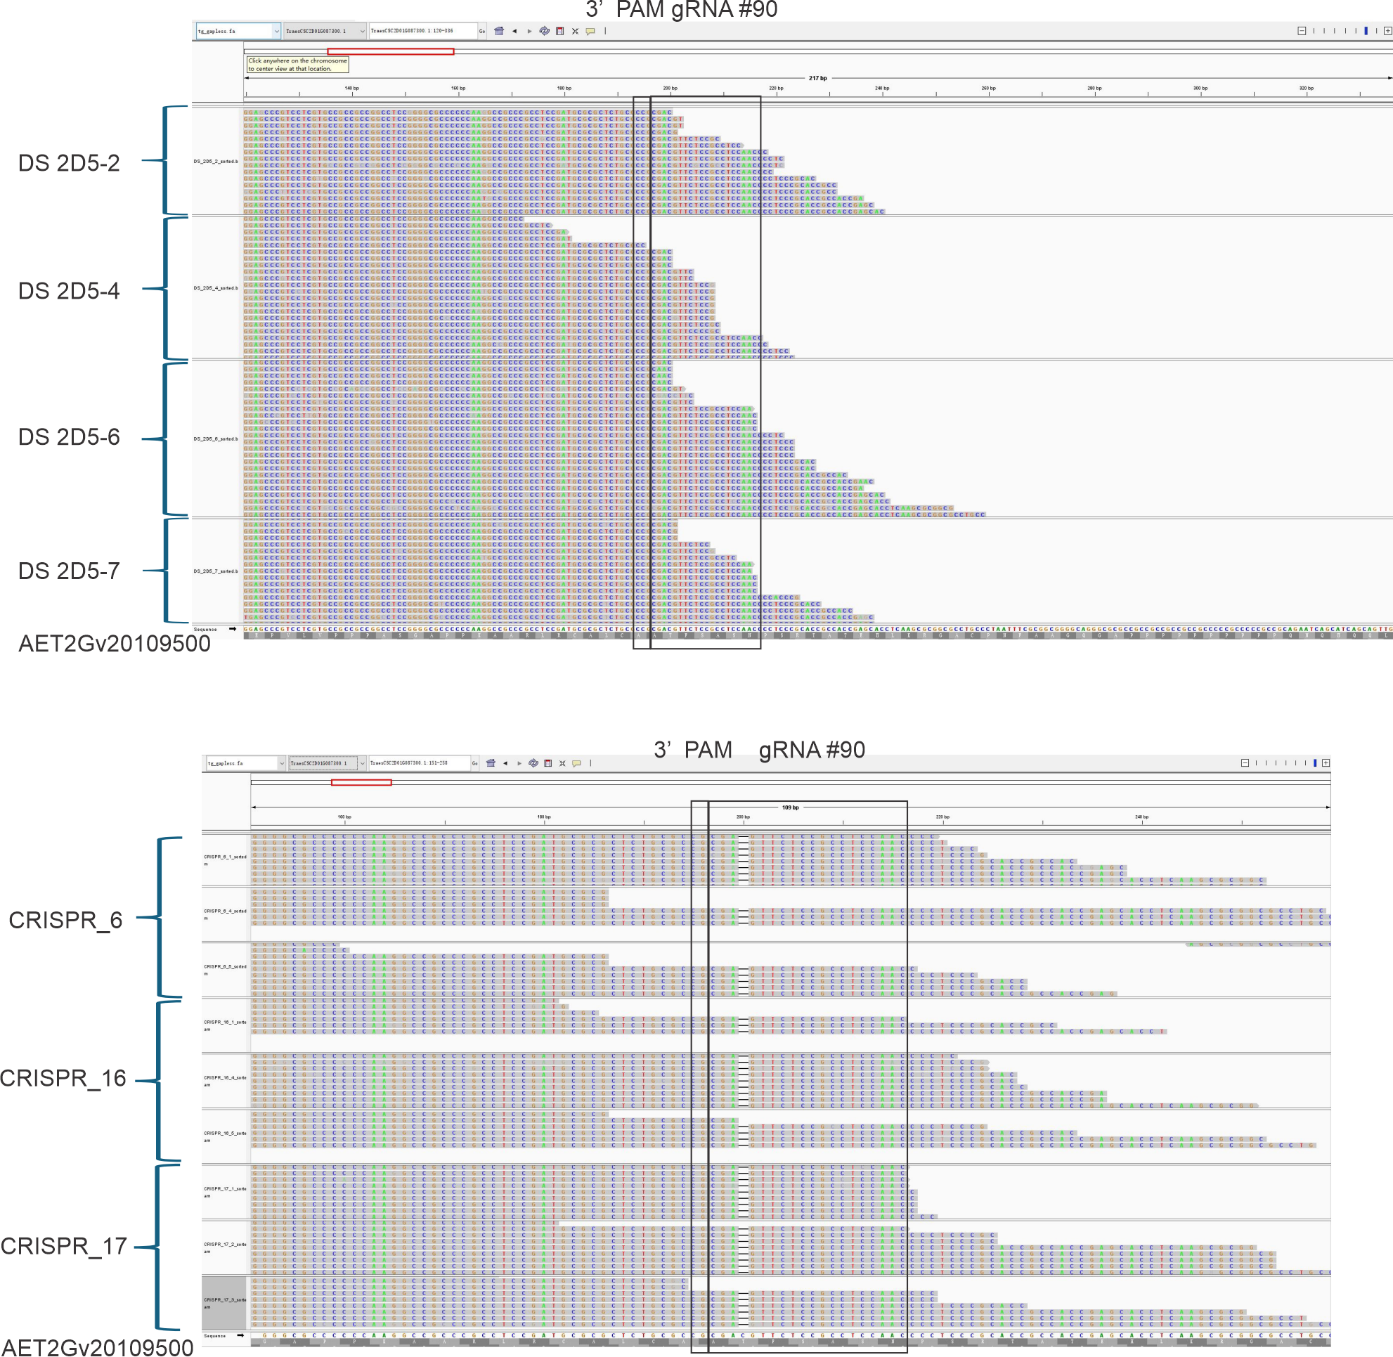 |
| --- |
| **Supplementary Fig. 14. Sequences of RNA-Seq reads mapped to the *AET2Gv20109500* gene sequence including gRNA site #90.** Sequences corresponding to gRNA #90 and PAM site are boxed. The upper panel displays sequences of reads from RNA samples of four DS2D5 plants (DS 2D5-2, -4, -6, and -7) andthe bottom panel displays sequences of reads from RNA samples of seven progeny plants of T2 families CRISPR-6, -16, and -17. Note a single base deletion 3 bp upstream of the PAM site in the reads of CRISPR samples where a C base is in the *AET2Gv20109500*gene sequence. |

**Supplementary Table 1.** Average plant height, spike length, and threshability of CRISPR-6, -16, and -17 T2 families, parental DS2D5, and Chinese Spring (CS).

| Line or family | Plants (no.) | Plant height (cm) | *p*-value* | Spike length (cm) | *p*-value* | Threshability | *p*-value* |
| --- | --- | --- | --- | --- | --- | --- | --- |
| CS | 5 | 84.3 | N/A | 7.4 | N/A | 0.99 | N/A |
| DS2D5 | 8 | 84.1 | N/A | 7.6 | N/A | 0.42 | N/A |
| T2 CRISPR-16 | 5 | 66.6 | 0.009 | 6.1 | <0.001 | 0.89 | <0.001 |
| T2 CRISPR-17 | 5 | 45.2 | <0.001 | 5.7 | <0.001 | 0.96 | <0.001 |
| T2 CRISPR-6 | 5 | 70.6 | 0.023 | 6.5 | 0.001 | 0.95 | <0.001 |

* two-tailed *t*-test of difference between a CRISPR family and DS2D5. *P-*values were adjusted for multiple comparisons with the Bonferroni correction.

**Supplementary Table 2.** Expression (Fragments per kilobase of exon per million mapped fragments, FPKM) of *Apetala2-like* genes in CRISPR/Cas9 loss-of-function mutants and parental DS2D5.

|  | *AP2L-5A* (*Q*) | *AP2L-5B* | *AP2L-5D* | *AP2L-2A* | *AP2L-2B* | *AP2L-2D* | *AP2L-7B* | *AP2L-7D* | *AP2L-6B* | *AP2L-1A* | *AP2L-1B* | *AP2L-1D* |
| --- | --- | --- | --- | --- | --- | --- | --- | --- | --- | --- | --- | --- |
| CRISPR | 10.95 | 3.37 | 2.99 | 6.10 | 6.97 | 3.34 | 0.60 | 0.43 | 0.09 | 0.00 | 0.04 | 0.00 |
| DS2D5 | 12.63 | 3.85 | 3.03 | 4.07 | 5.18 | 3.13 | 0.40 | 0.50 | 0.08 | 0.00 | 0.03 | 0.05 |
| *p*-value* | 0.11 | 0.50 | 0.94 | 0.17 | 0.04 | 0.55 | 0.25 | 0.63 | 0.79 | N/A | 0.60 | N/A |

*two-tailed *t*-test

| 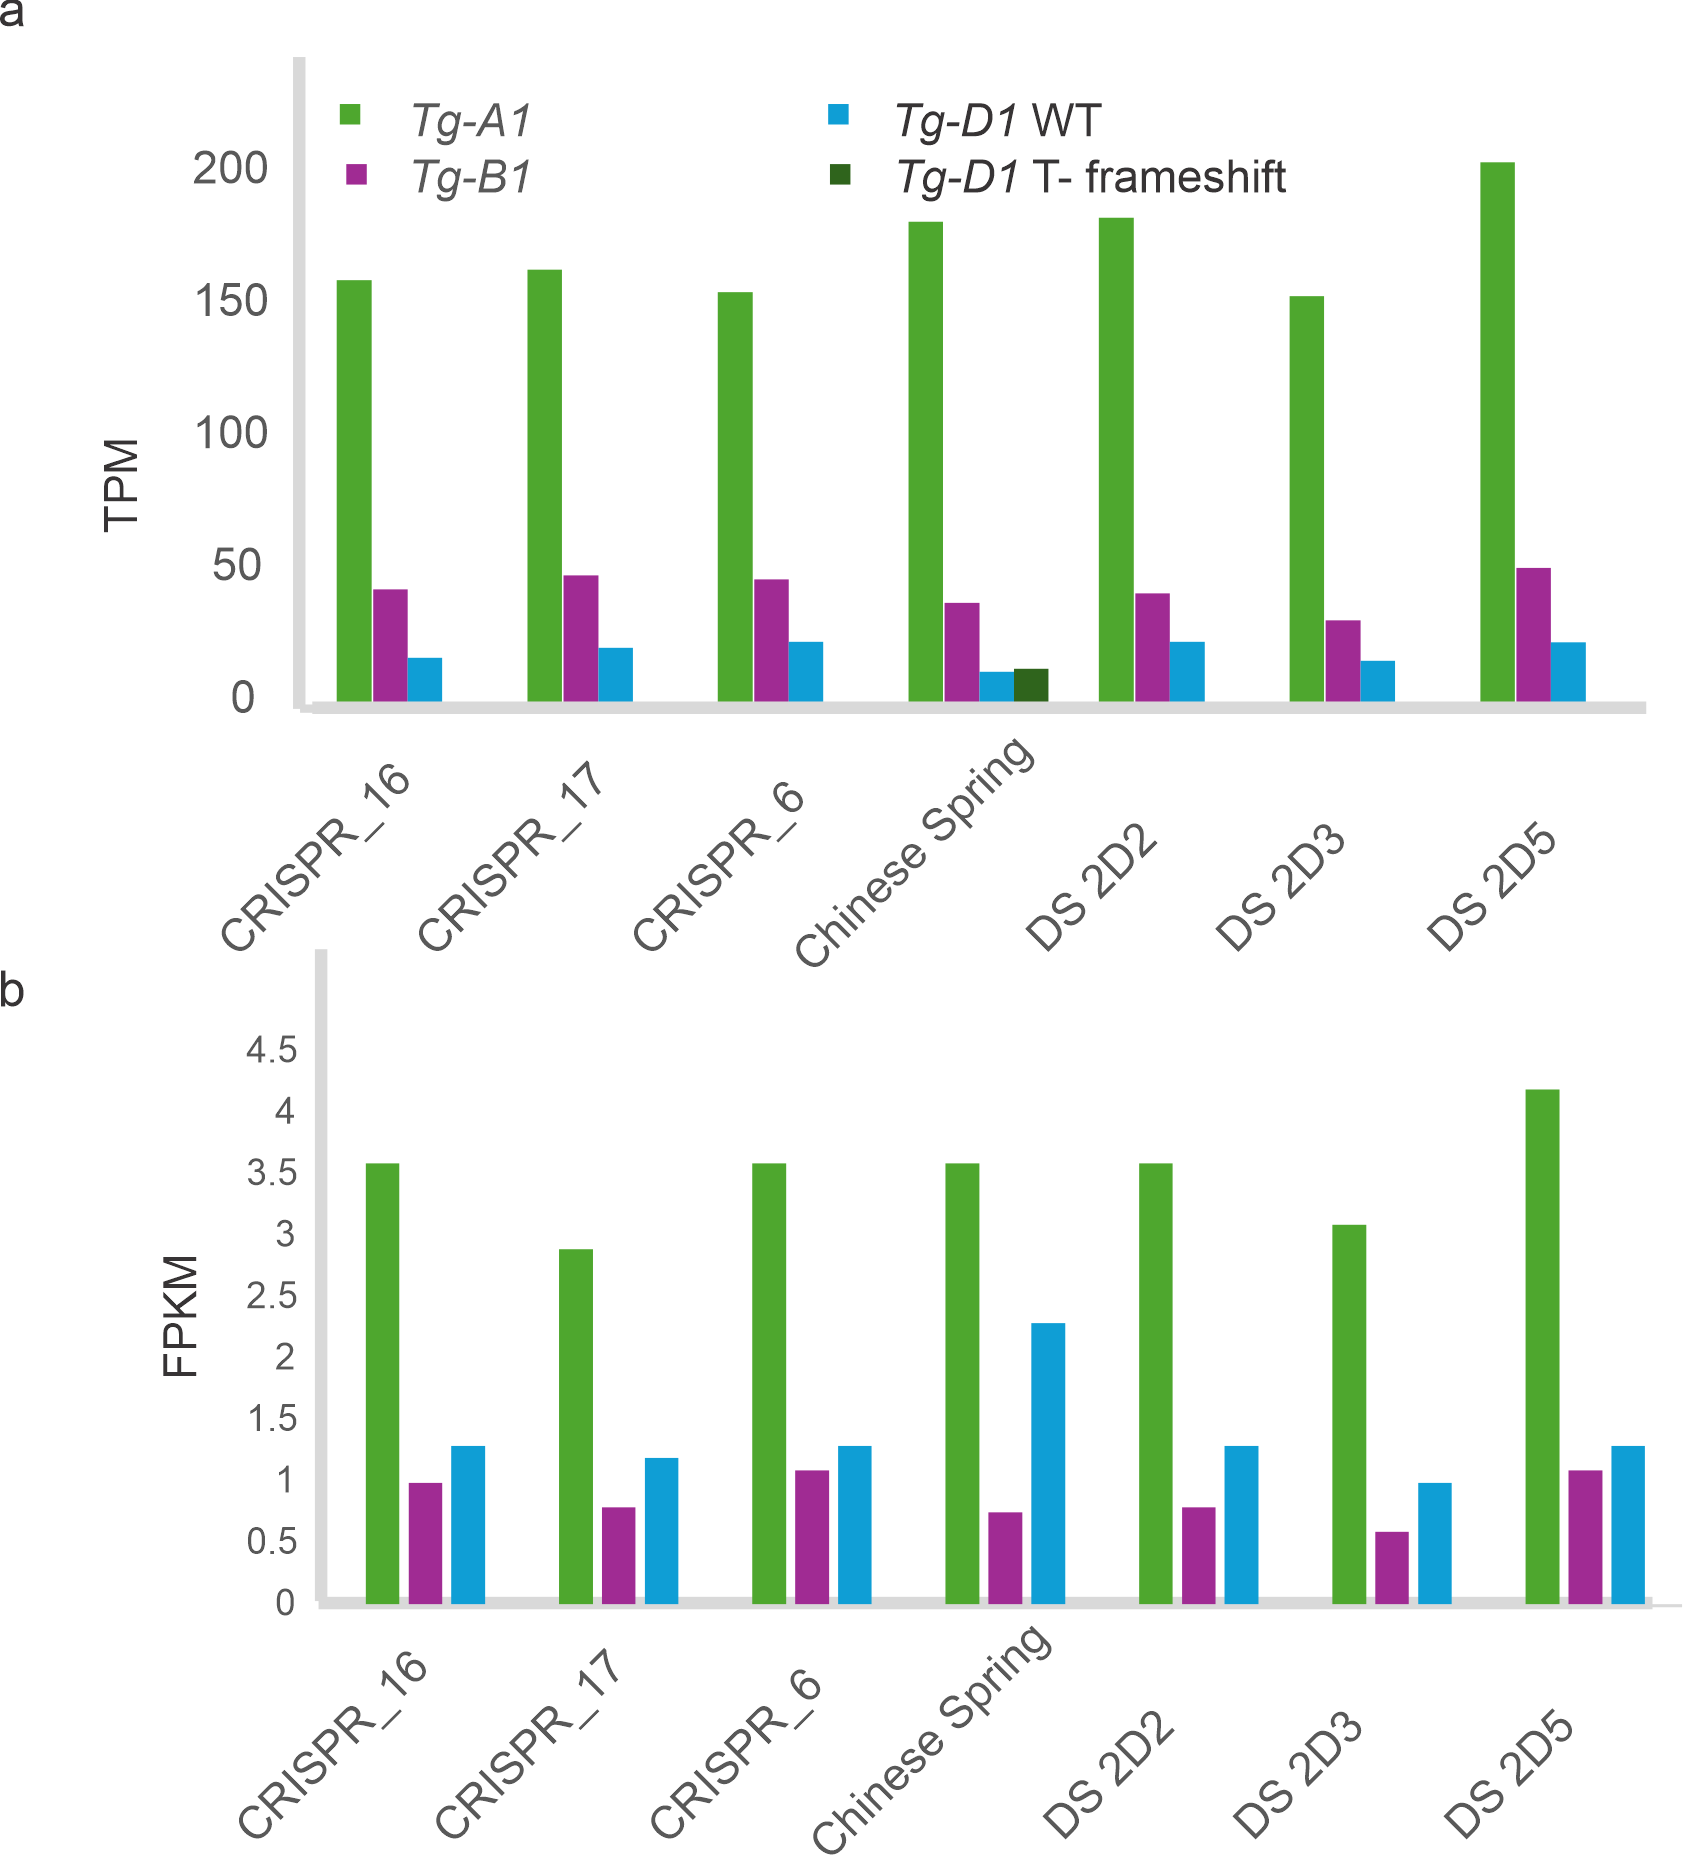 |
| --- |
| **Supplementary Fig. 15. RNA-Seq gene expression**. **a** Transcripts per million reads, TPM) mapped to the *Tg1-A1, Tg1-B1* and *Tg1-D1* genes in the CS-CAU genome sequence4. Numbers of reads mapped to the WT and T- frameshift mutant genes at the *tg1-D1* locus are shown. **b** Fragments per kilobase of transcript per million mapped reads FPKM mapped to *Tg1-A1, Tg1-B1* and *Tg1-D1* genes in the Chinese Spring genome sequence IWGSC RefSeq v2.13. |

| 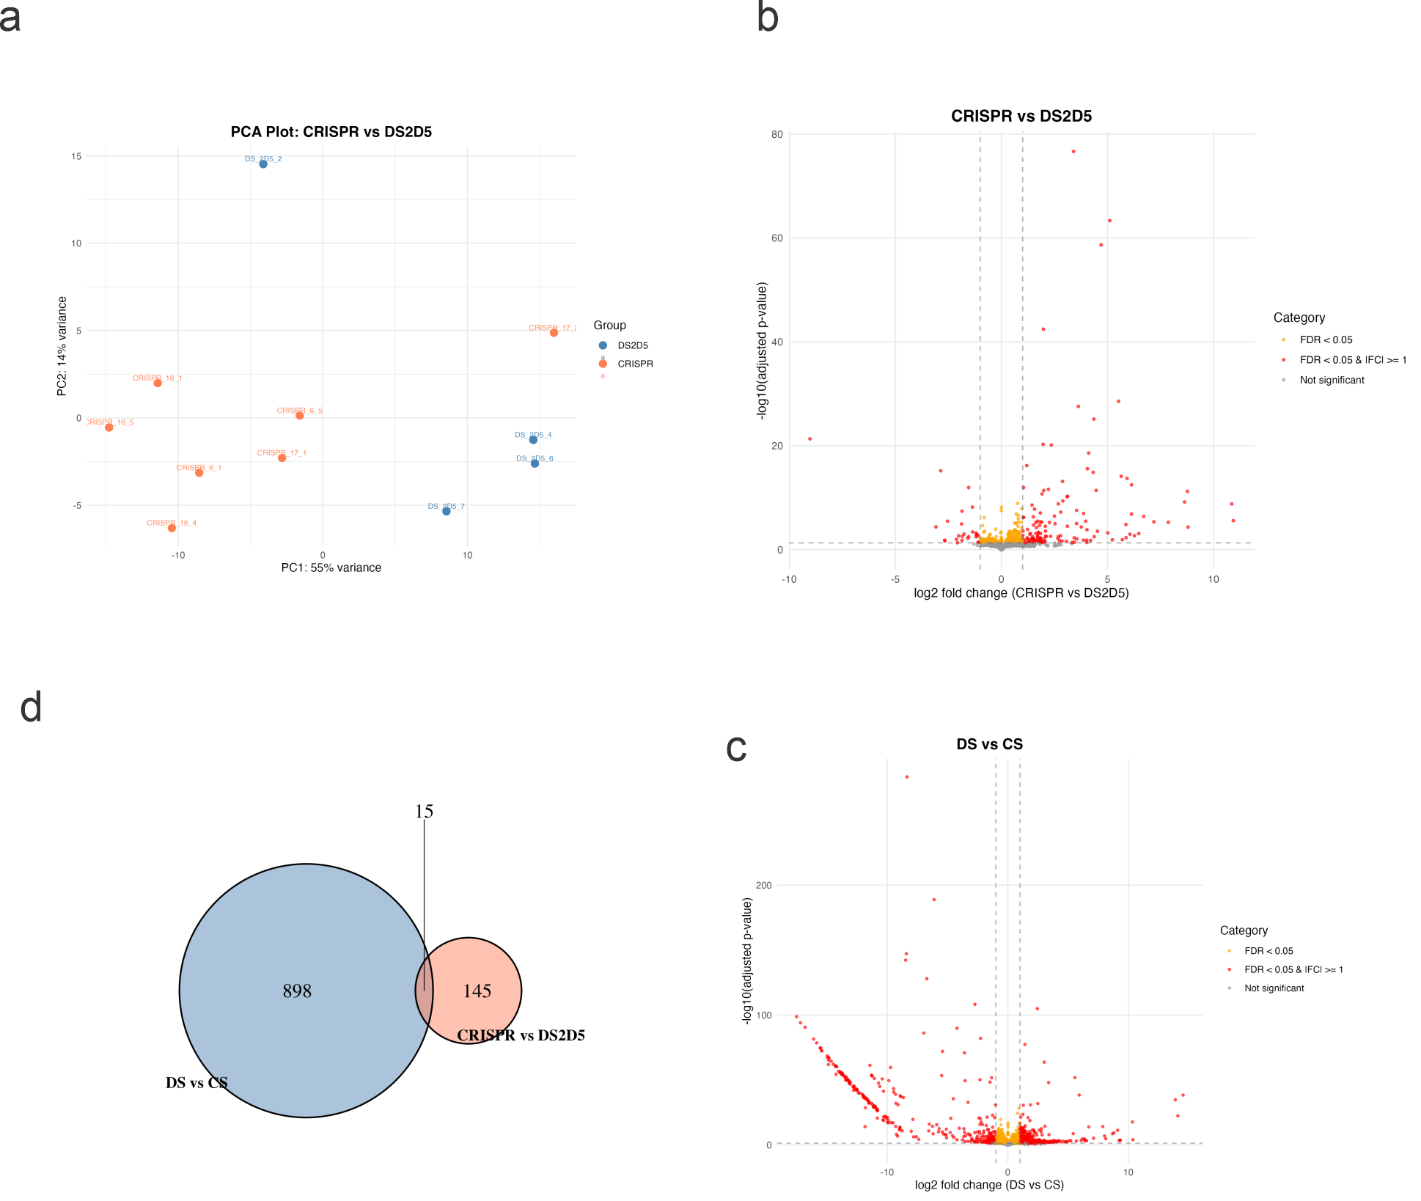 |
| --- |
| **Supplementary Fig. 16**. D**ifferentially expressed genes (DEGs). a** We mapped RNA-Seq reads from individual T2 plants of *AET2Gv20109500*loss-of-function mutant families CRISPR-16, -17, and -6 and parental DS2D5 to the CS-CAU genome sequence and performed principal component analysis (PCA). **b** Volcano plot of DEGs with Log2-fold change of in T2 CRISPR/Cas9 *AET2Gv20109500*loss-of-function mutant families vs parental DS2D5. **c** Volcano plot of DEGs with Log2-fold change of differentially expressed genes in DS2D2, DS2D3, and DS2D5 vs CS. **d** Venn diagram of DEGS in (**b)** and (**c**) and their intersection. |

| 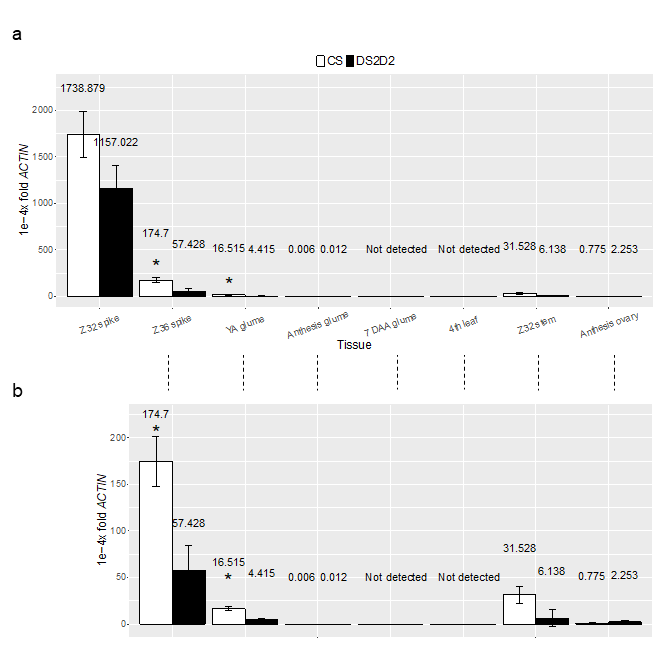 |
| --- |
| **Supplementary Fig. 17. *Tg-D1* expression in DS2D2 and Chinese Spring.** The following tissues and stages were sampled: spikes at Zadoks5 growth scale stages Z32 and Z36, stem at the Z32 stage, glumes at the yellow anther stage (YA) and at 7 days after anthesis (DAA), most recent leaf at the 4-leaf stage, and ovary at anthesis (for more details see **Supplementary Data 3**). Transcript values were expressed as 1e-4x folds of *ACTIN* using the comparative CT method6. qRT-PCR primers amplified both the WT gene and the genes with T- frameshift mutation. Two to three biological replicates were used. * indicates significant differences (*α*=0.05, *t*-test) between CS and DS2D2. The error bars represent the standard errors calculated from least-squares means. **a** All samples. **b** The same data as in (**a**), but without Z32 to better illustrate the differences among the remaining samples. |

| 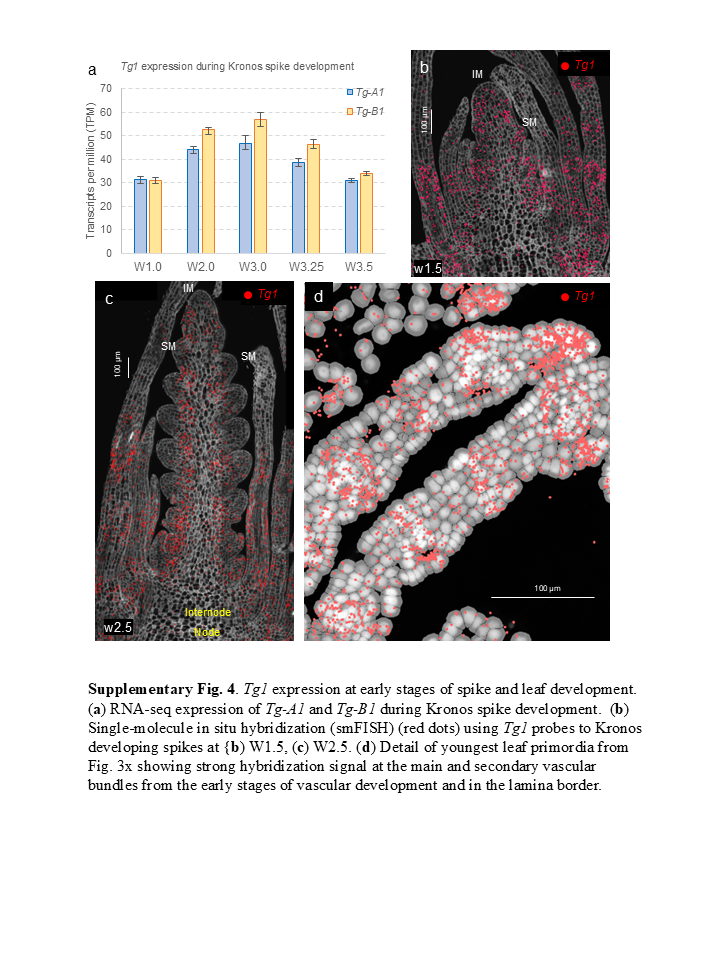 |
| --- |
| **Supplementary Fig. 18**. ***Tg1* expression at early stages of spike and leaf development in durum wheat cv Kronos**. **a** RNA-Seq expression of *Tg-A1* and *Tg-B1* during spike development. **b-c** Single-molecule *in situ* hybridization (smFISH) (red dots) using *Tg1* probes to developing spikes at the Waddington spike developing stages W1.5 (**b**) and W2.5 (**c**). **d** Detail of youngest leaf primordia from **Fig. 3d** showing strong hybridization signal (red dots) at the main and secondary vascular bundles from the early stages of vascular development and in the lamina border. |

|  |
| --- |
| **Supplementary Fig. 19. Expression of the *Tg-A1* and *Tg-B1* loci in durum wheat cv Svevo and NIL-65**. RNA was sampled from developing spikes at the following stages: (1) booting stage (Early), (2) when the top awn appeared (Mid), and (3) heading stage (Late). A 4.5-Mb segment including *Tg-B1* of chromosome 2B from wild emmer acc. Zavitan was introgressed into durum wheat cv Svevo in NIL-65. Statistical significance (*t*-test) of difference in expression in Svevo and NIL-65 is shown above the bars. Note that the wild emmer 2B allele conferring a non-free-threshing phenotype on NIL-65 is significantly more expressed than the durum wheat cv Svevo allele conferring a free-threshing phenotype. |

| 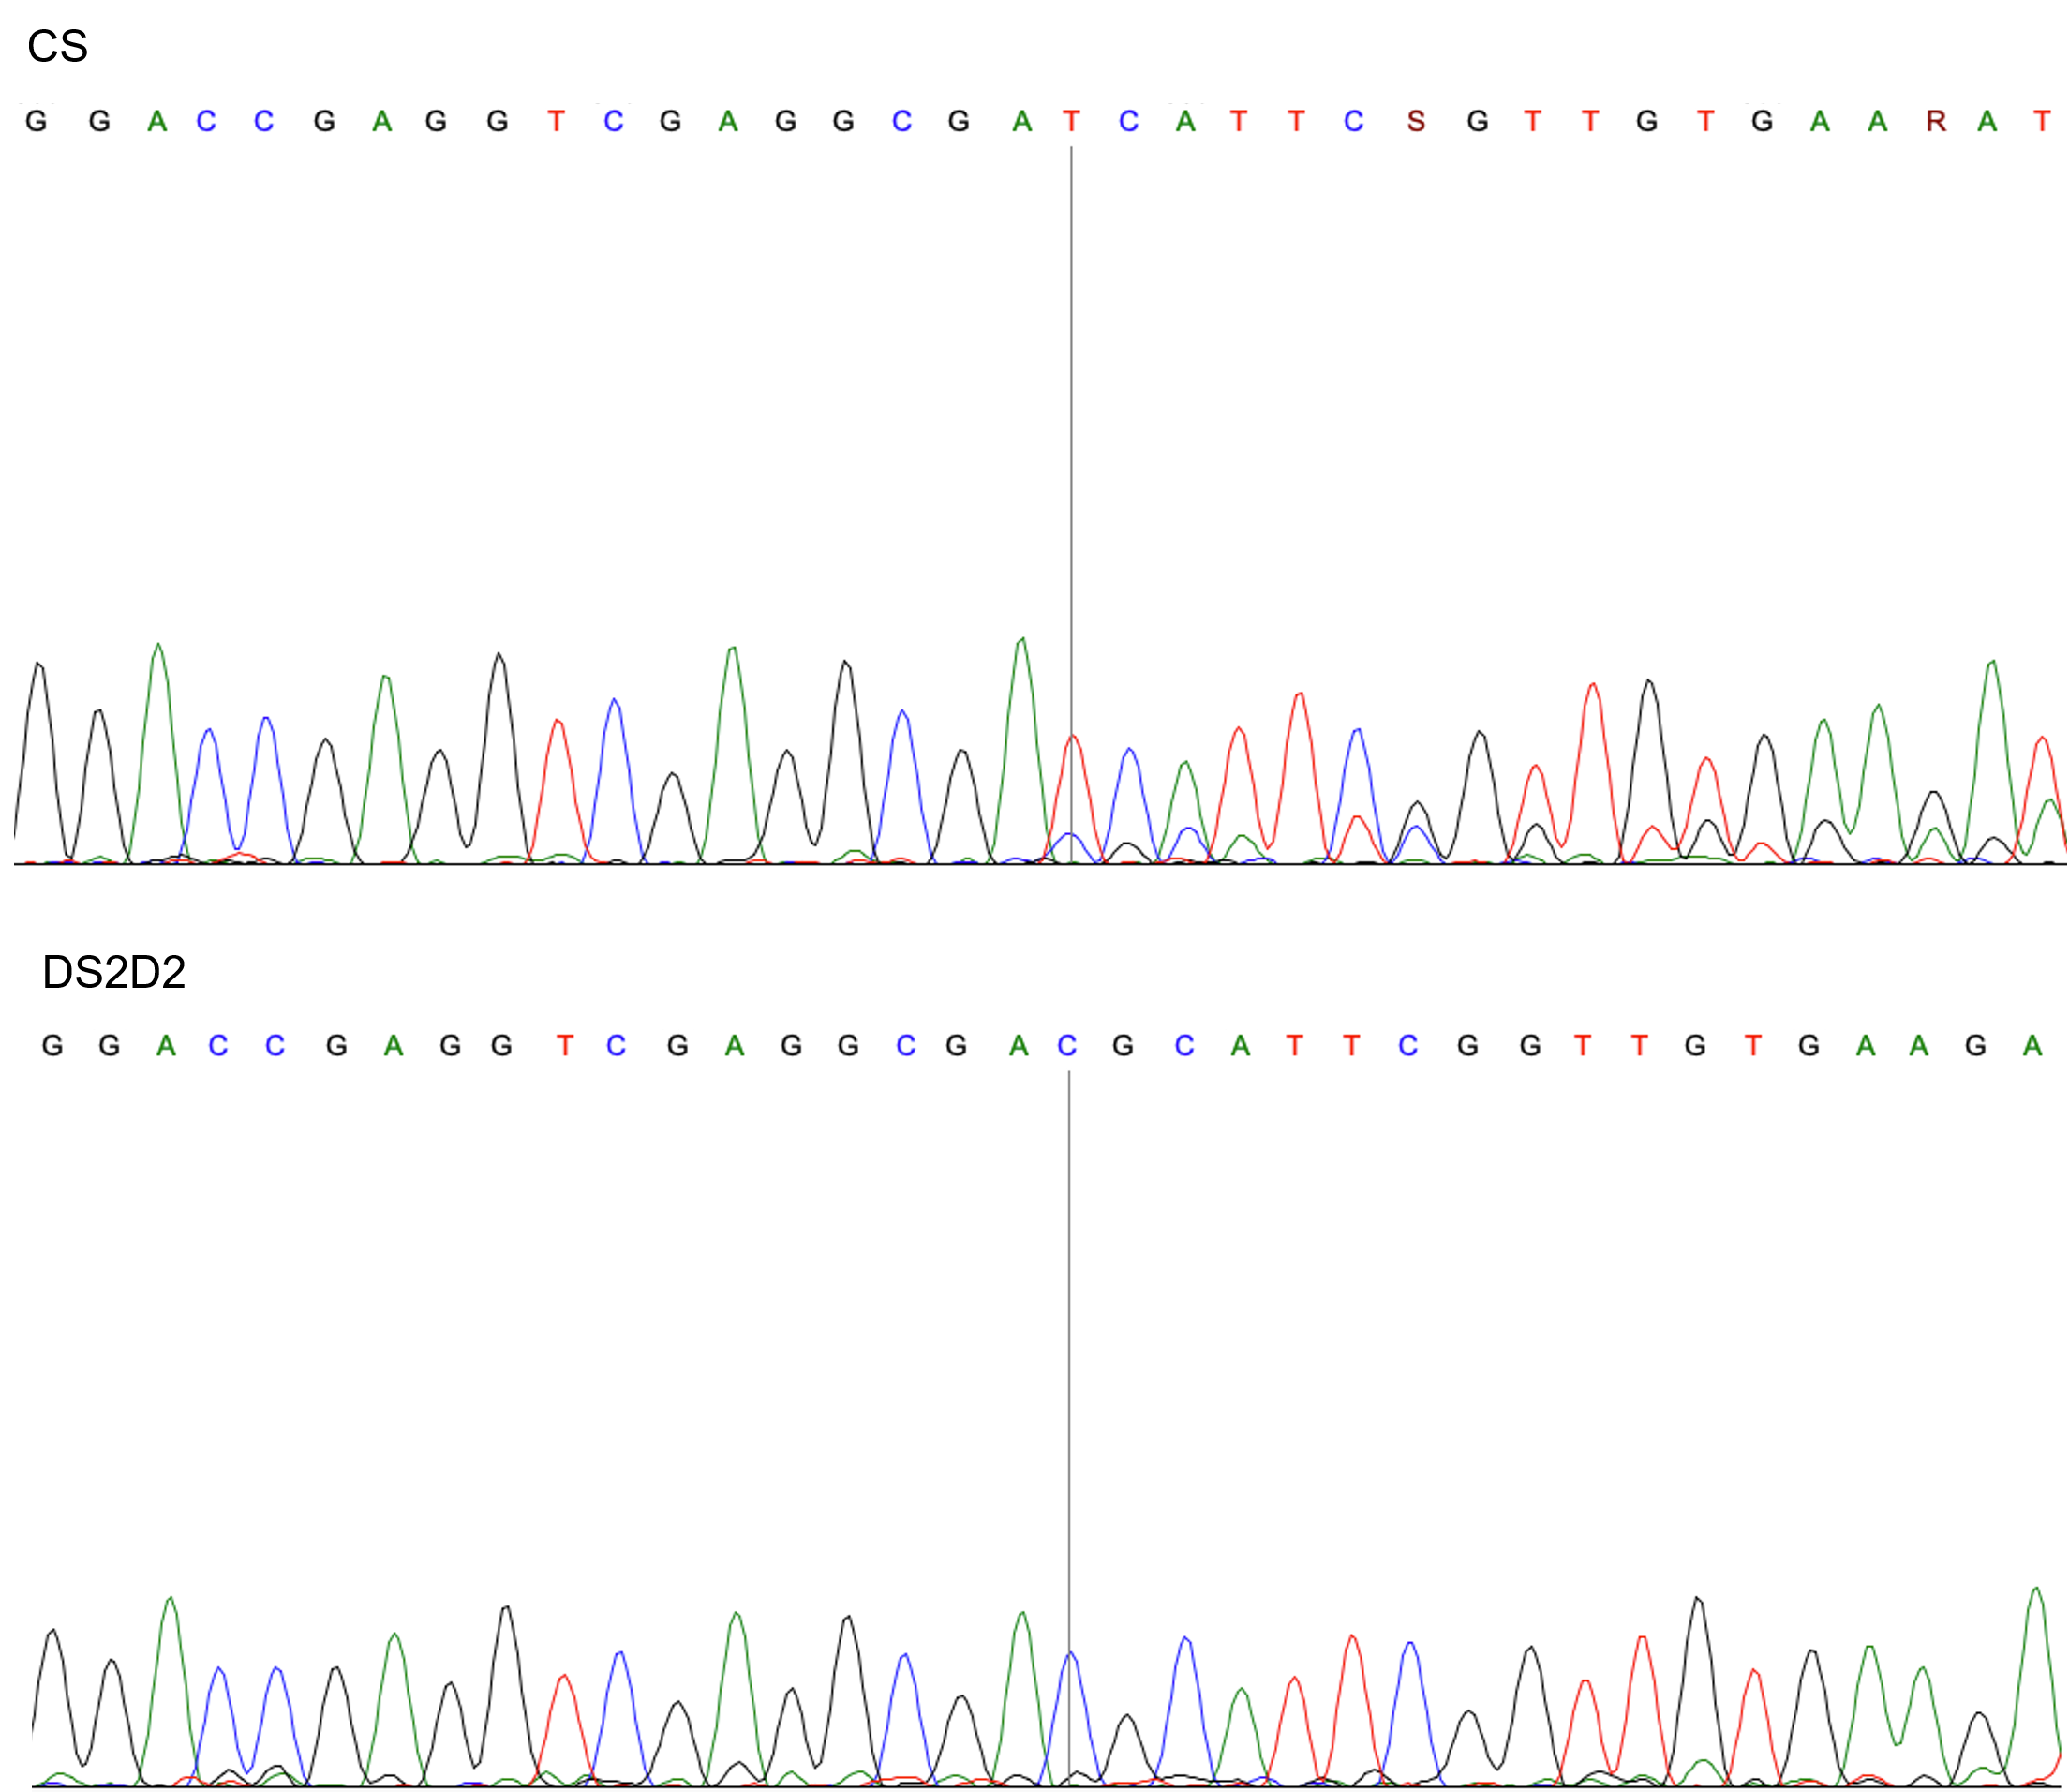 |
| --- |
| **Supplementary Fig. 20. CS and DS2D2 *AET2Gv20109500* electropherograms.** The *AET2Gv20109500*gene sequence was amplified with 2D-specific PCR primers (**Supplementary Data 4**) and the amplicon was used as a template for Sanger sequencing. The vertical lines indicate the T/C double peak and C peak at the CDS +1,649 bp position in the CS and DS2D2 electropherograms, respectively. |

| 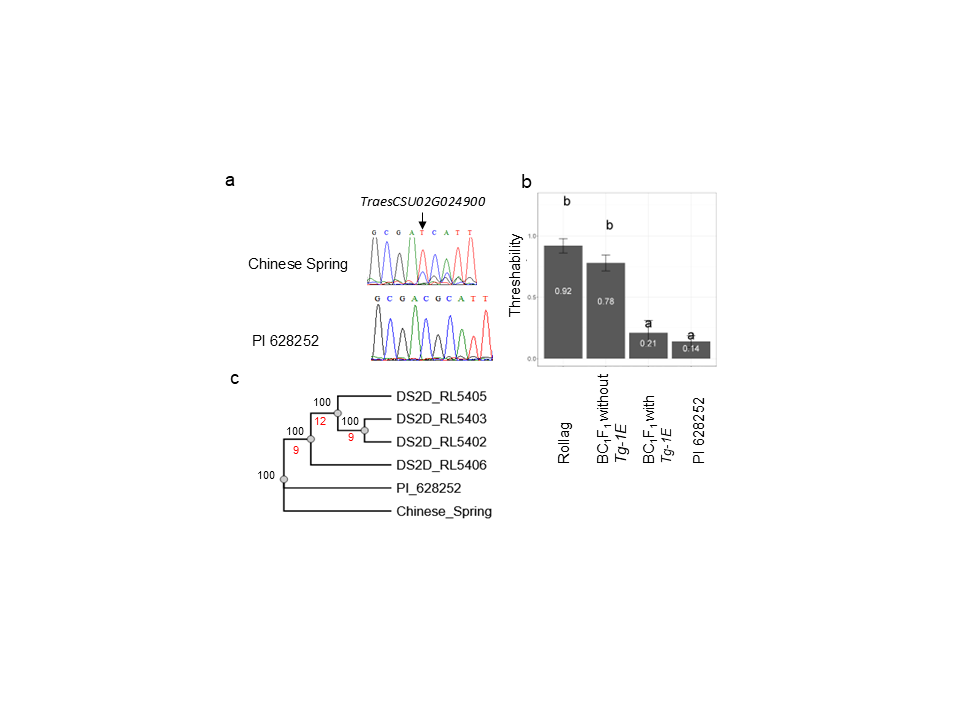 |
| --- |
| **Supplementary Fig. 21.** **Non-free-threshing Iranian wheat PI 628252**. **a** Electropherograms of bases surrounding the CDS +1,649 to 1,650 bp site (arrow) in the CS and PI 628252. The electropherogram of CS shows a T peak superimposed on a C peak due to the presence of one gene with the WT sequence and three genes with the T- mutation/indel. In contrast, the electropherogram of PI 628252 shows only the WT gene sequence. **b** Since PI 628252 is awned, its threshability was compared to an introgression line in the bread wheat cv Rollag that segregated for *Lophopyrum elongatum* chromosome arm 2ES bearing the non-free-threshing *Tg-E1* gene on the 2ES chromosome arm. Columns sharing a common letter are not significantly different from each other (*α*=0.05, Tukey’s test). Error bars are standard errors calculated from least-square means. PI 628252 had threshability similar to that of the BC1F1 plants with *Tg-E1* and significantly lower than plants devoid of *Tg-E1*, indicating that PI 628252 was non-free-threshing. **c** Unrooted dendrogram constructed from SNPs (red numbers) in sequences for nine loci spanning a 1.5-Mb region around the *Tg-D1* gene in PI 628252, CS, and DS2D2, DS2D3, and DS2D5. The black numerals specify bootstrap confidence and red numerals specify the number of SNPs in a branch. Note that there were no SNPs between PI 628252 and CS, suggesting that PI 628252 was likely a reversion rather than a recent introgression into *T. aestivum* from *Ae. tauschii*. |

| 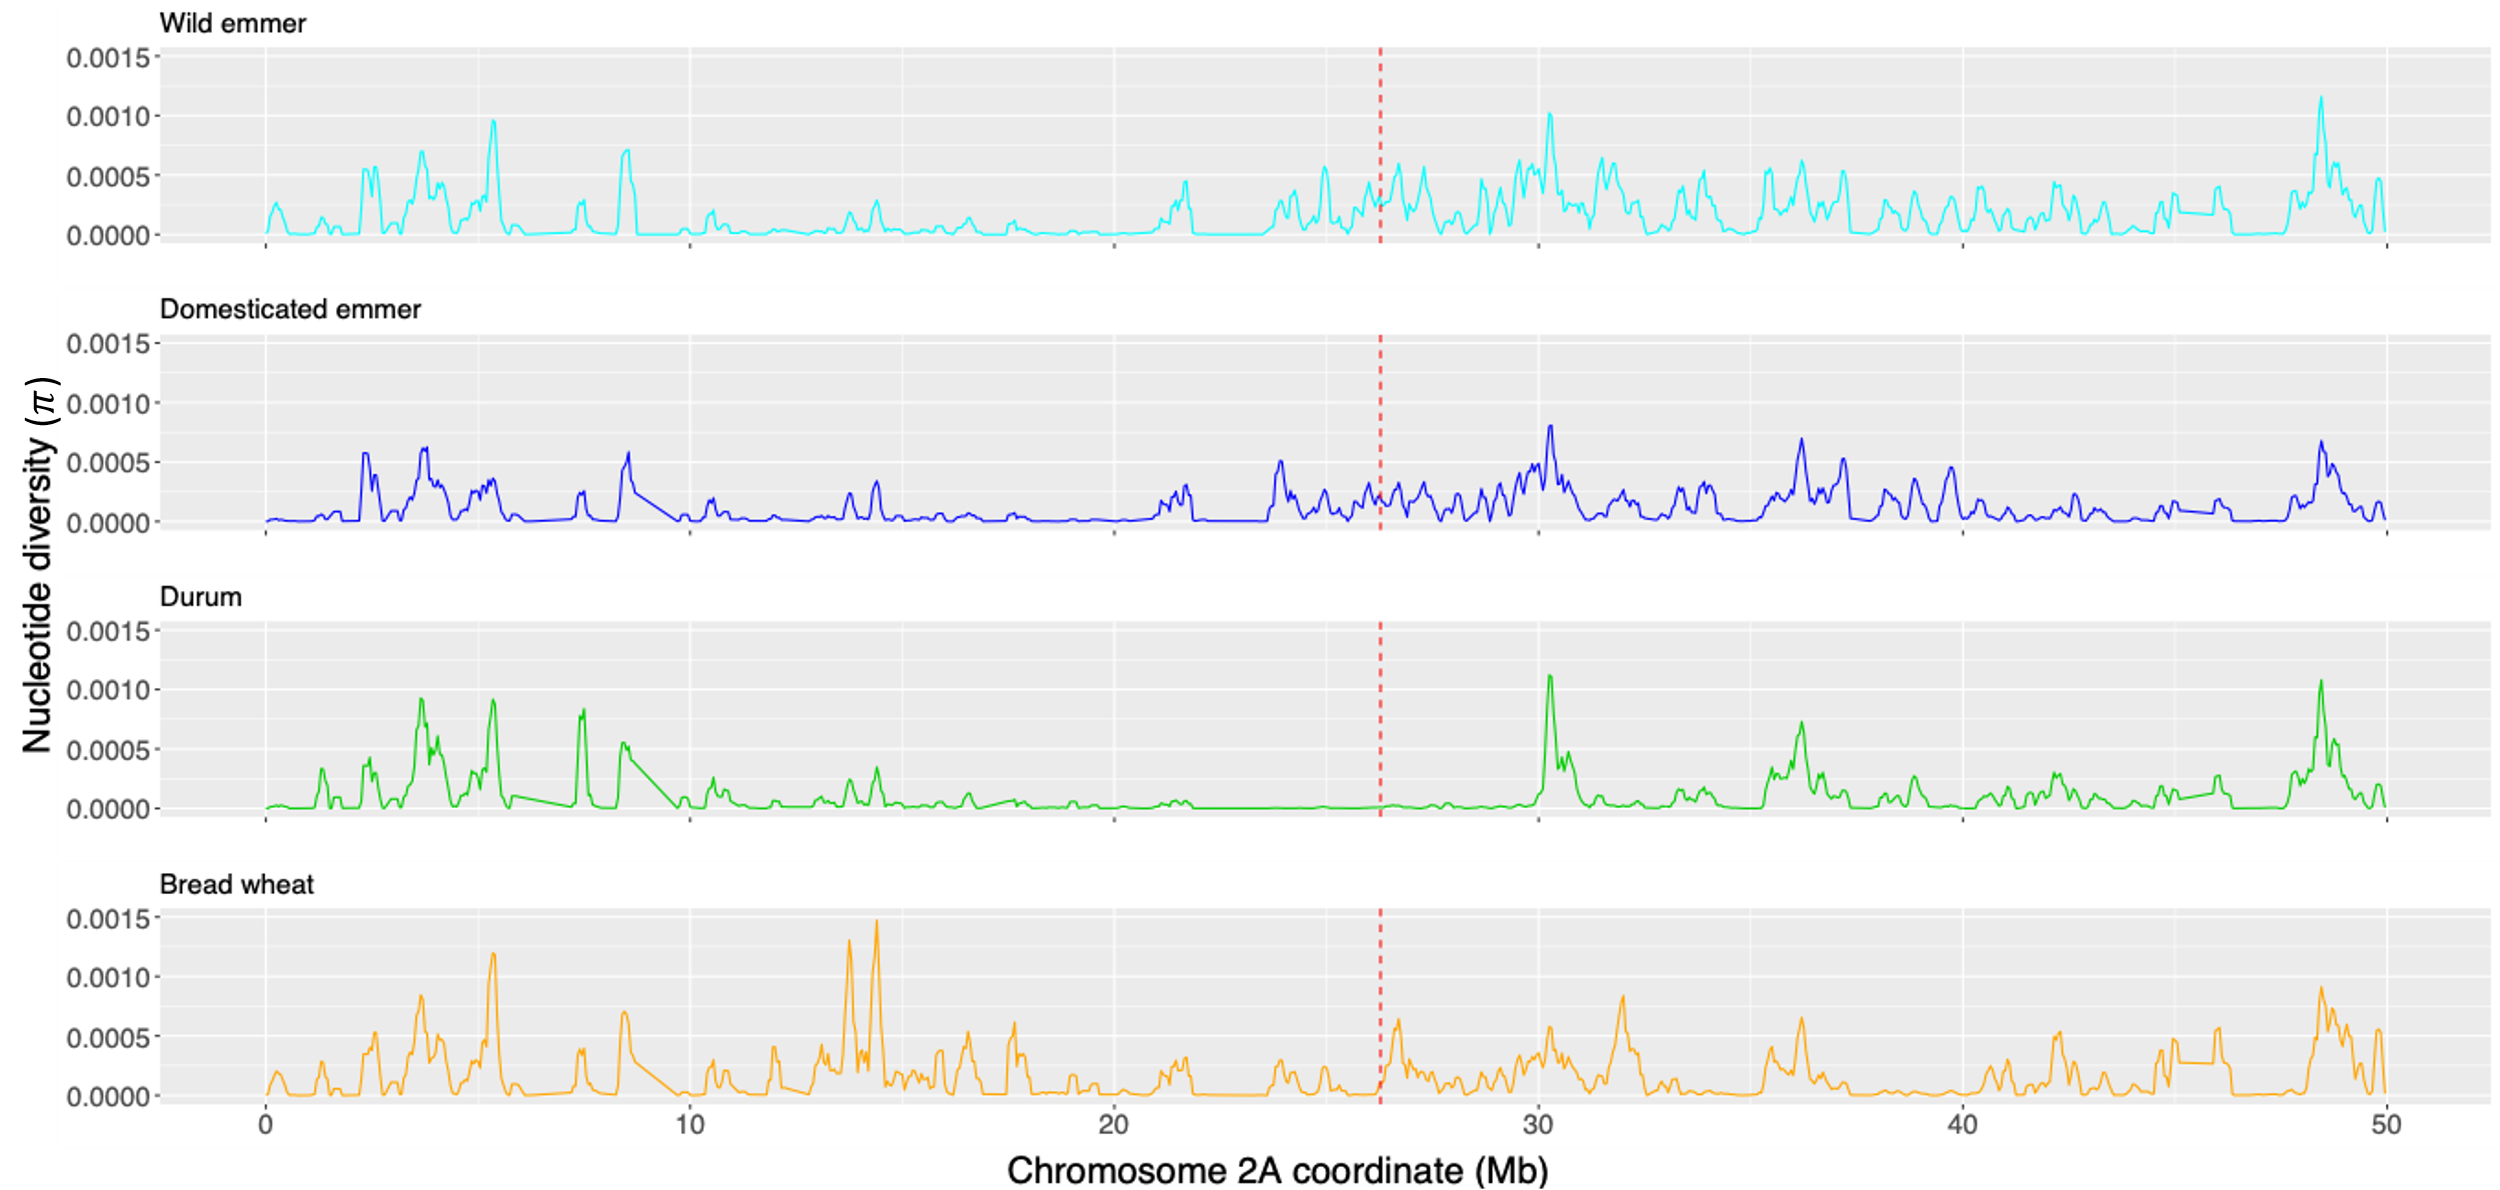 |
| --- |
| **Supplementary Fig. 22. Nucleotide diversity (*π*) across a 50-Mb region around *Tg-A1.*** The locations of the *Tg-A1* is indicated by red vertical lines. Sequence data of Zhou et al.7 were used to compute *π* in wild emmer, domesticated emmer, durum wheat, and bread wheat. A window size of 200 kb and a step size of 10 kb was used in *π* computation. |

|  |
| --- |
| **Supplementary Fig. 23. XP-CLR across a 50 Mb region around** *Tg-A1****.*** For a legend see Supplementary Fig. 22. A grid size of 50 kb and a window size of 1 cM were used. The maximum number of SNPs within a window was 200 and the correlation level was 0.95. |

|  |
| --- |
| **Supplementary Fig. 24. *F*ST across a 50-Mb region around** *Tg-A1****.*** For legend details, see Supplementary Fig. 22. A window of 200 kb and a step size of 10 kb were used. |

| 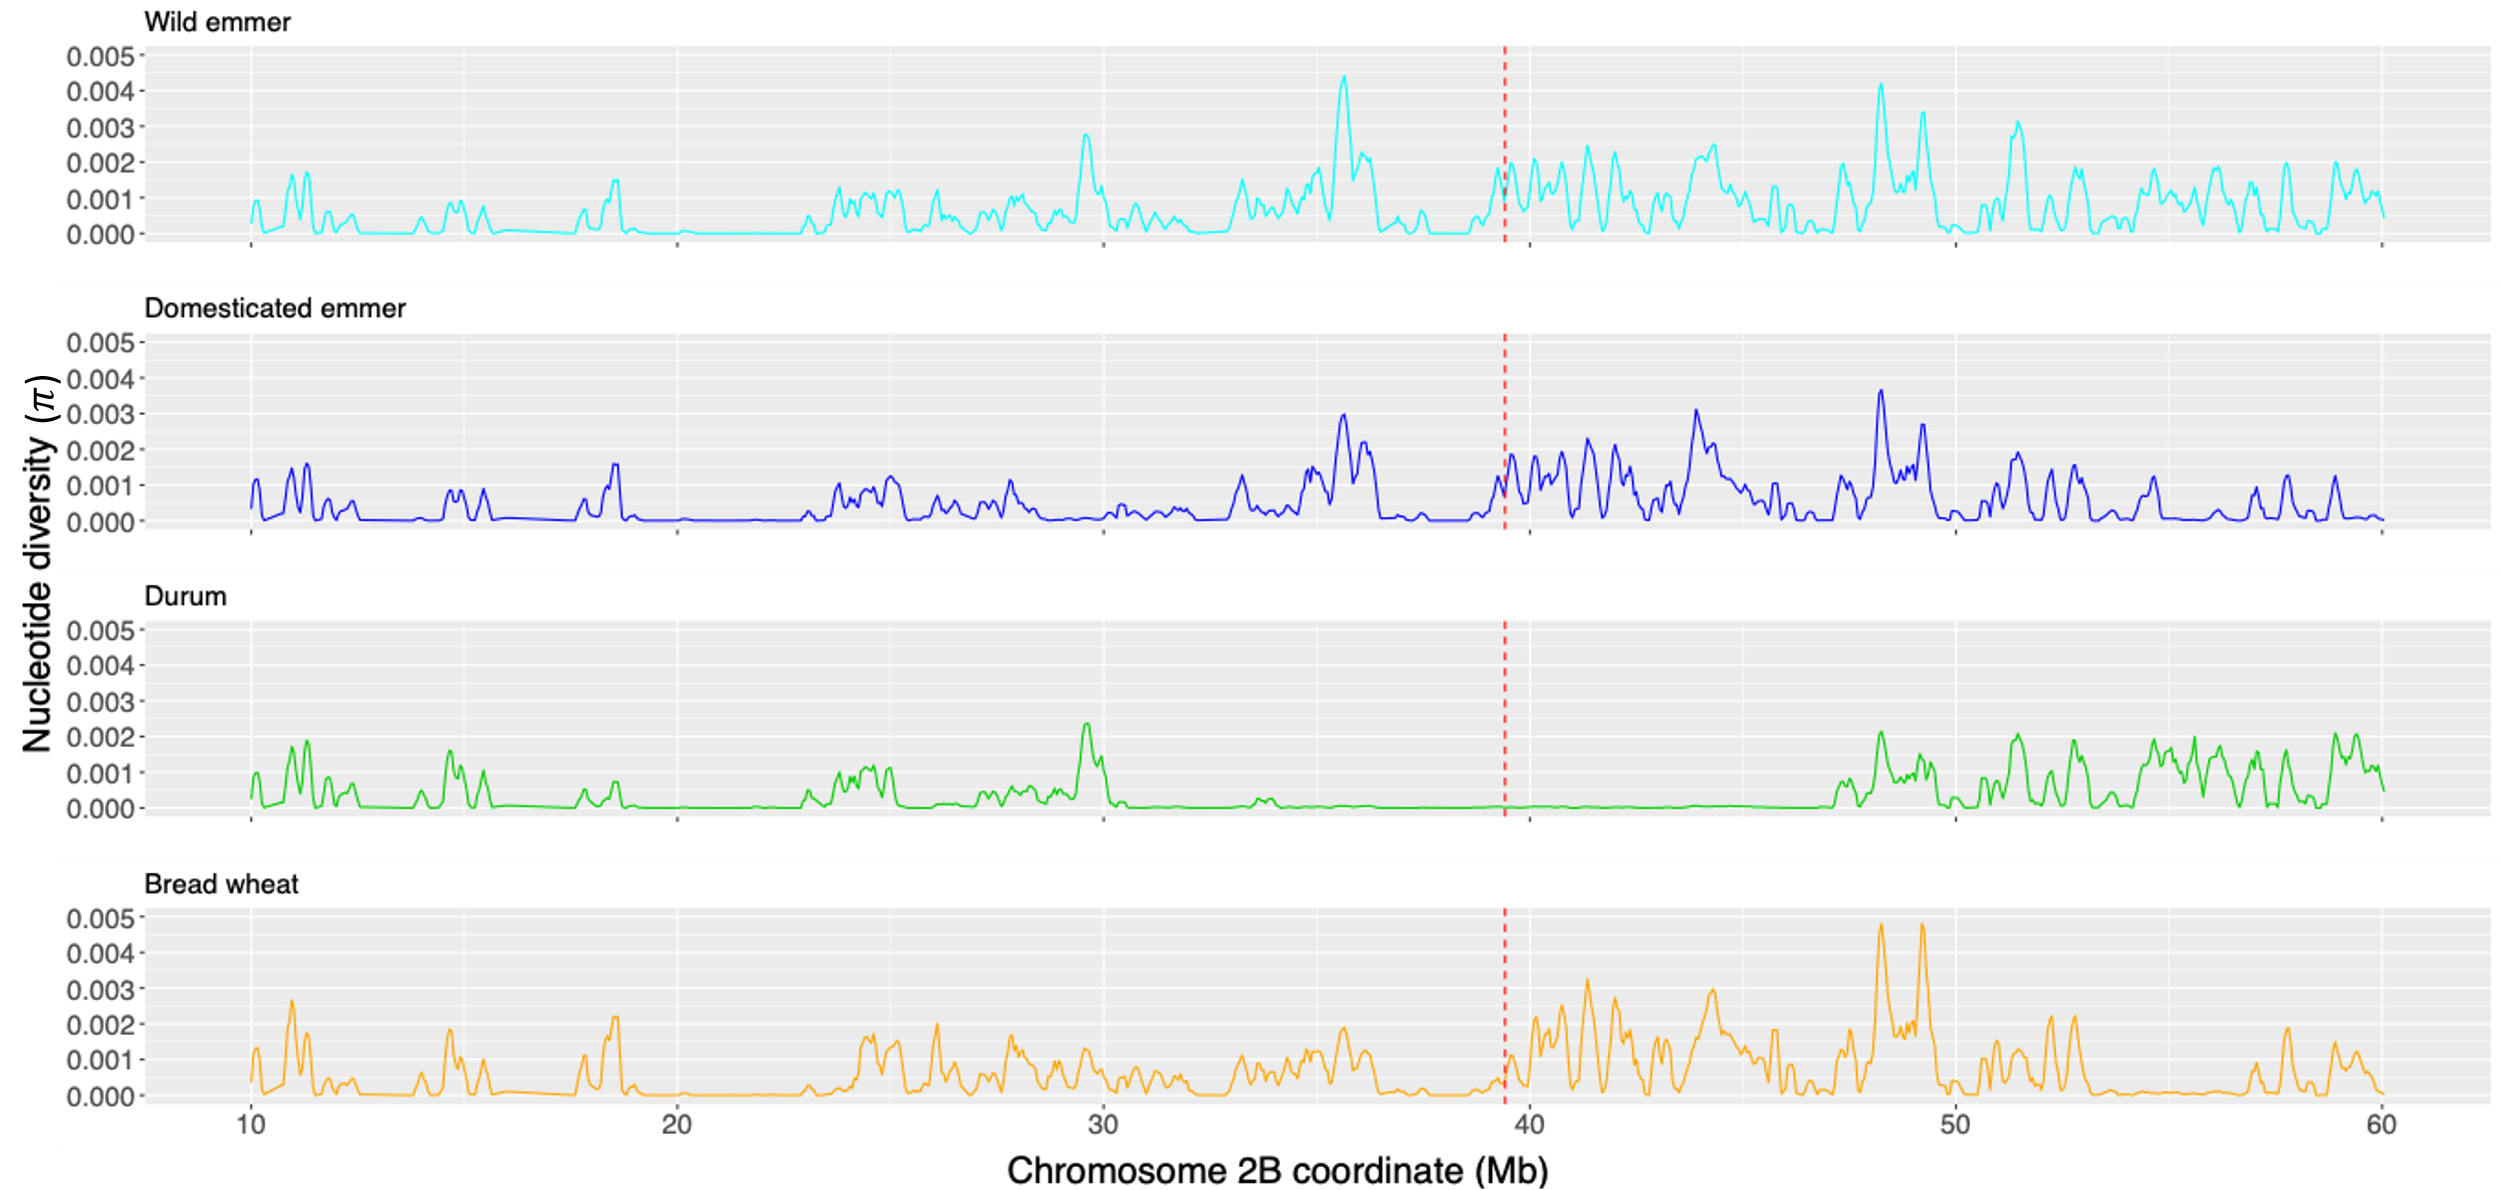 |
| --- |
| **Supplementary Fig. 25. Nucleotide diversity (*π*) across a 50-Mb region around** *Tg-B1.* The position of the locus in the 2B chromosome sequence is indicated by red vertical lines. Sequence data of Zhou et al.7 were used to compute *π* in wild emmer, domesticated emmer, durum wheat, and bread wheat. A window size of 200 kb and a step size of 10 kb were used. |

|  |
| --- |
| **Supplementary Fig. 26. XP-CLR across a 50-Mb region around** *Tg-B1****.*** Forlegend details, see Supplementary Fig. 25. A grid size of 50 kb and a window size of 1 cM were used. The maximum number of SNPs within a window was 200 and the correlation level was 0.95. |

|  |
| --- |
| **Supplementary Fig. 27. *F*ST across a 50-Mb region around** *Tg-B1****.*** Forlegend details, see Supplementary Fig. 25. A window of 200 kb and a step size of 10 kb were used. |

| 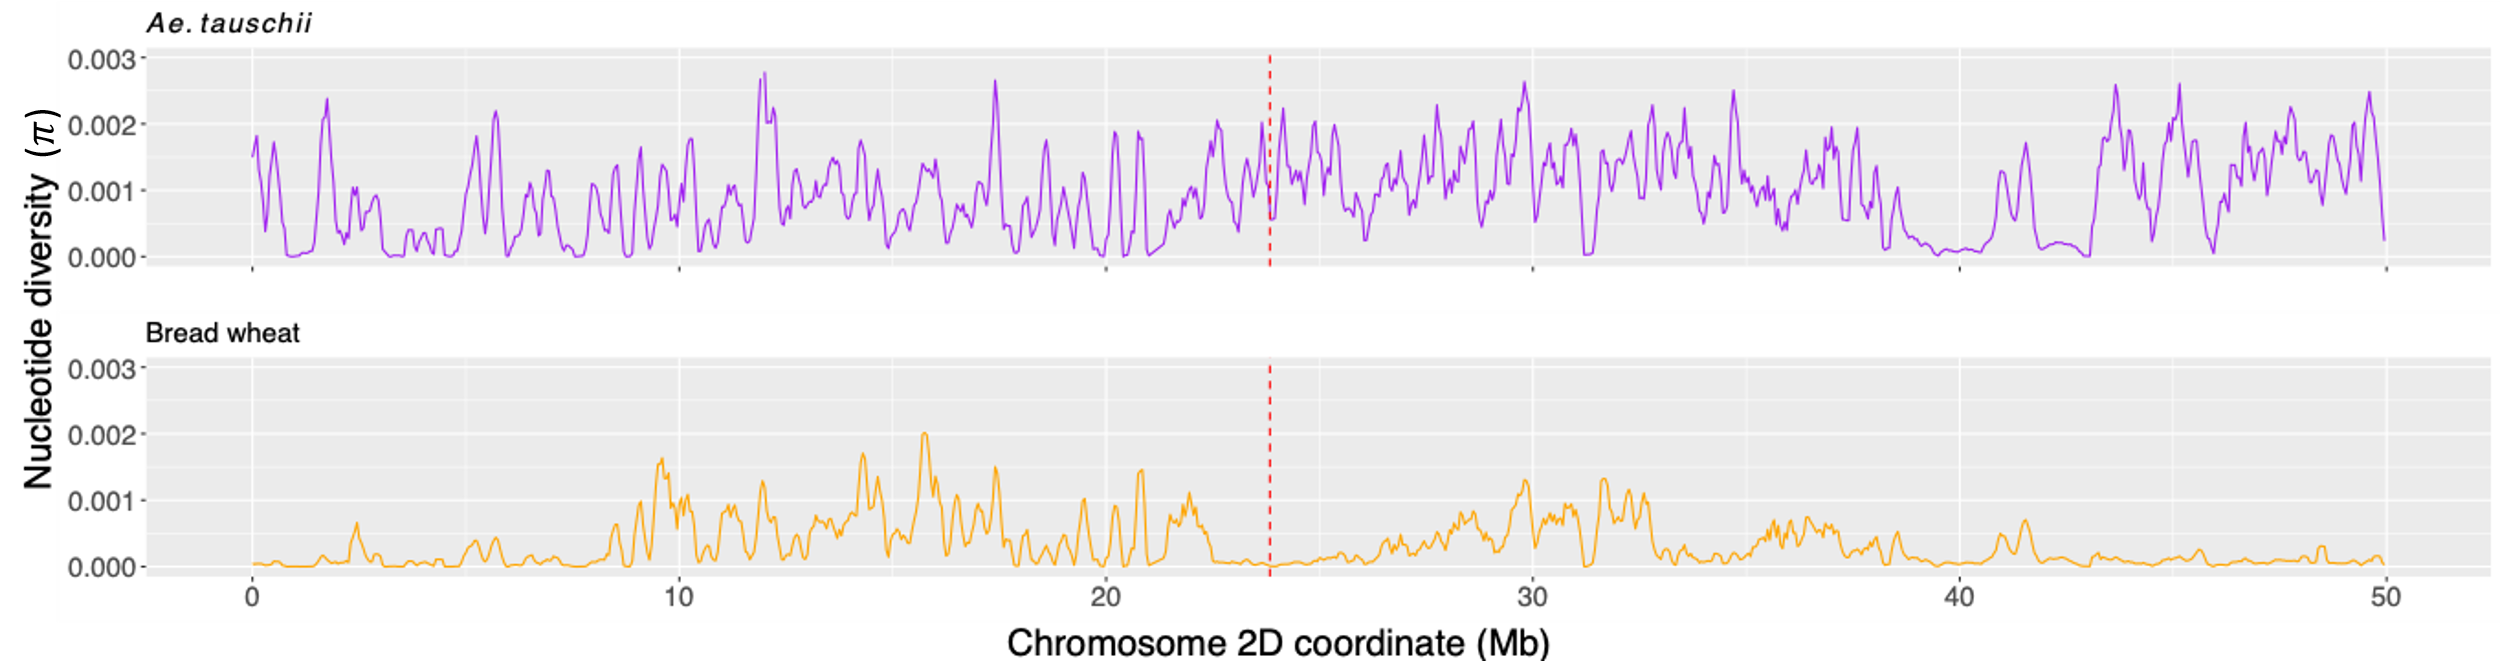 |
| --- |
| **Supplementary Fig. 28. Nucleotide diversity (*π*) across a 50-Mb region around***Tg-D1.*  **in *Ae. tauschii* and bread wheat*.*** The location of *Tg-D1* is indicated by red vertical lines. We used Zhou et al. 7 sequence data to compute *π.* A window size of 200 kb and a step size of 10 kb were used in *π* computation. |

|  |
| --- |
| **Supplementary Fig. 29. XP-CLR across a 50-Mb region around** *Tg-D1****.*** For legend details, see Supplementary Fig. 28. A grid size of 50 kb and a window size of 1 cM were used. The maximum number of SNPs within a window was 200 and the correlation level was 0.95. |

|  |
| --- |
| **Supplementary Fig. 30. *F*ST across a 50-Mb region around the *AET2Gv20109500* locus on chromosome 2D*.*** For legend details, see Supplementary Fig. 28. A window of 200 kb and a step size of 10 kb were used. |

1 Dvorak, J. *et al.* The origin of spelt and free-threshing hexaploid wheat. *J. Hered.* **103**, 426-441, doi:doi:10.1093/jhered/esr152 (2012).

2 Luo, M. C. *et al.* Genome sequence of the progenitor of the wheat D genome Aegilops tauschii. *Nature* **551**, 498-502, doi:10.1038/nature24486 (2017).

3 Zhu, T. *et al.* Optical maps refine the bread wheat Triticum aestivum cv Chinese Spring genome assembly. *Plant J.* **doi/10.1111/tpj.15289** (2021).

4 Wang, Z. *et al.* Near-complete assembly and comprehensive annotation of the wheat Chinese Spring genome. *Mol. Plant* **18**, 892-907, doi:10.1016/j.molp.2025.02.002 (2025).

5 Zadoks, J. C., Chang, T. T. & Konzak, C. F. Decimal Code for Growth Stages of Cereals. *Weed Res* **14**, 415-421, doi:DOI 10.1111/j.1365-3180.1974.tb01084.x (1974).

6 Livak, K. J. & Schmittgen, T. D. Analysis of relative gene expression data using real-time quantitative PCR and the 2(T)(-Delta Delta C) method. *Methods* **25**, 402-408, doi:10.1006/meth.2001.1262 (2001).

7 Zhou, Y. *et al.* Triticum population sequencing provides insights into wheat adaptation. *Nat Genet* **52**, 1412-1422, doi:10.1038/s41588-020-00722-w (2020).
