# Supplementary material
Source: Research Square preprint supplement (doi:10.21203/rs.3.rs-9315249/v1)
Supplement: Supplementary file 2 [file 26028fc4b61d51029351a8c6.xlsx]

## Sheet: Sheet1
Supplementary Data 9. Tg-A1 haplotypes in diploid, tetraploid and hexaploid wheat The type of mutation (synonymous, missence, or nonsence) for each polymorphic position is indicated in row 2. Bases identical to those in the CS reference sequence are in green cells and variant bases are in cells with other colors. The following code is used for data source: 3. Bread wheat RNA-seq62; 4. Exome seque…
						missense	synonymous	synonymous	synonymous	nonsense	missense	synonymous	synonymous	synonymous	synonymous	synonymous
Species	Ploidy	Common name	Accession	Data source	Origin	28 bp	576 bp	771 bp	1038 bp	1362 bp	1373 bp	1524 bp	1779 bp	2172 bp	2226 bp	2283 bp
Triticum urartu	Diploid	Wild einkorn	PI 428316	6	Iran	G	C	G	T	C	C	A	G	C	C	C
Triticum urartu	Diploid	Wild einkorn	PI 428320	6	Lebanon	G	C	G	T	C	C	C/A	G	C	C	C
Triticum urartu	Diploid	Wild einkorn	PI 428280	6	Lebanon	G	NA	G	T	C	C	A	G	C	C	C
Triticum urartu	Diploid	Wild einkorn	PI 428313	6	Lebanon	G	C	G	T	C	C	A	G	C	C	C
Triticum urartu	Diploid	Wild einkorn	IG 46085	6	Turkey	G	NA	G	NA	C	C	A	NA	C	C	C
Triticum urartu	Diploid	Wild einkorn	PI 428292	6	Lebanon	G	C	G	T	C	C	C/A	G	C	C	C
Triticum urartu	Diploid	Wild einkorn	PI 662280	6	Lebanon	G	C	G	NA	C	C	A	G	C	C	C
Triticum urartu	Diploid	Wild einkorn	PI 538742	6	Lebanon	NA	C	G	T	C	C	A	G	C	C	C
Triticum urartu	Diploid	Wild einkorn	PI 428284	6	Lebanon	G	C	G	T	C	C	A	G	C	C	C
Triticum urartu	Diploid	Wild einkorn	PI 662278	6	Syria	G	C	G	T	C	C	A	G	C	C	C
Triticum urartu	Diploid	Wild einkorn	A025	6	Lebanon	G	C	G	T	C	C	C	G	C	C	C
Triticum urartu	Diploid	Wild einkorn	IG 45477	6	Iran	NA	NA	G	T	C	C	C	G	NA	C	C
Triticum urartu	Diploid	Wild einkorn	PI 554599	6	Turkey	G	C	G	T	C	C	C	G	C	C	C
Triticum urartu	Diploid	Wild einkorn	IG 113240	6	Iran	G	NA	G	T	C	C	C	G	C	C	NA
Triticum urartu	Diploid	Wild einkorn	PI 428253	6	Iraq	G	C	G	T	C	C	C	G	C	C	C
Triticum urartu	Diploid	Wild einkorn	PI 427328	6	Iraq	G	C	G	T	C	C	C	G	C	C	C
Triticum urartu	Diploid	Wild einkorn	PI 428190	6	Turkey	NA	C	G	NA	C	C	C	G	C	C	C
Triticum urartu	Diploid	Wild einkorn	PI 428274	6	Lebanon	G	C	G	T	C	C	C	G	C	C	C
Triticum urartu	Diploid	Wild einkorn	PI 538726	6	Turkey	G	C	G	T	C	C	C	G	C	C	C
Triticum urartu	Diploid	Wild einkorn	PI 428256	6	Turkey	G	C	G	T	C	C	C	G	C	C	C
Triticum urartu	Diploid	Wild einkorn	PI 428303	6	Lebanon	G	C	G	NA	C	C	NA	G	C	NA	C
Triticum urartu	Diploid	Wild einkorn	PI 428237	6	Turkey	G	C	G	NA	C	C	C	G	C	C	C
Triticum urartu	Diploid	Wild einkorn	PI 428318	6	Turkey	G	C	G	T	C	C	C	G	C	C	C
Triticum urartu	Diploid	Wild einkorn	PI 428255	6	Turkey	G	C	G	T	C	C	C	G	C	C	C
Triticum urartu	Diploid	Wild einkorn	PI 538744	6	Lebanon	NA	NA	G	T	C	C	C	G	C	C	C
Triticum urartu	Diploid	Wild einkorn	PI 428188	6	Turkey	NA	NA	G	T	C	C	C	G	C	C	C
Triticum urartu	Diploid	Wild einkorn	PI 428210	6	Turkey	G	C	G	T	C	C	C	G	C	C	C
Triticum urartu	Diploid	Wild einkorn	PI 662226	6	Syria	G	C	G	T	C	C	C	G	C	C	C
Triticum urartu	Diploid	Wild einkorn	TRI 17921	6	Turkey	G	C	G	NA	C	C	NA	G	C	C	NA
Triticum monococcum ssp. baeoticum	Diploid	Wild einkorn	TRI 18444	6	Turkey	A	G	G	C	C	C	C	C	C	T	NA
Triticum monococcum ssp. monococcum	Diploid	Wild einkorn	PI 560728	6	Turkey	A	G	G	C	C	C	C	C	C	T	T
Triticum monococcum ssp. baeoticum	Diploid	Wild einkorn	TRI 18808	6	Turkey	G	G	G	C	C	C	C	C	C	T	T
Triticum monococcum ssp. baeoticum	Diploid	Wild einkorn	TRI 18446	6	Turkey	G	G	G	C	C	C	C	C	C	T	T
Triticum monococcum ssp. baeoticum	Diploid	Wild einkorn	TRI 15115	6	Greece	G	G	G	C	C	C	C	C	T	C	T
Triticum monococcum ssp. aegilopoides	Diploid	Wild einkorn	PI 374575	6	Serbia	G	G	G	C	C	C	C	C	T	C	T
Triticum monococcum ssp. aegilopoides	Diploid	Wild einkorn	PI 554525	6	Turkey	G	G	G	C	C	C	C	C	T	C	T
Triticum monococcum ssp. baeoticum	Diploid	Wild einkorn	TRI 10059	6	Bulgaria	G	G	G	C	C	C	NA	NA	C	C	C/T
Triticum monococcum ssp. aegilopoides	Diploid	Wild einkorn	PI 272519	6	Hungary	G	G	G	C	C	C	NA	C	NA	C	T
Triticum monococcum ssp. aegilopoides	Diploid	Wild einkorn	CItr 17673	6	Iraq	G	G	G	C	C	C	C	C	C	C	T
Triticum monococcum ssp. aegilopoides	Diploid	Wild einkorn	PI 427800	6	Iran	G	G	G	C	C	C	C	C	C	C	T
Triticum monococcum ssp. aegilopoides	Diploid	Wild einkorn	PI 427700	6	Iraq	G	G	G	C	C	C	C	C	C	C	T
Triticum monococcum ssp. baeoticum	Diploid	Wild einkorn	TRI 18435	6	Turkey	G	G	G	C	C	C	C	C	C	C	T
Triticum monococcum ssp. baeoticum	Diploid	Wild einkorn	TRI 11494	6	Turkey	G	G	G	C	C	C	C	C	C	C	T
Triticum urartu	Diploid	Wild einkorn	TRI 11348	6	NA	G	G	G	C	C	C	C	C	C	C	T
Triticum monococcum ssp. aegilopoides	Diploid	Wild einkorn	PI 573525	6	Turkey	G	G	G	C	C	C	C	NA	C	C	NA
Triticum monococcum ssp. aegilopoides	Diploid	Wild einkorn	PI 427854	6	Iraq	G	G	G	C	C	C	C	NA	C	NA	C
Triticum monococcum ssp. aegilopoides	Diploid	Wild einkorn	PI 428002	6	Lebanon	NA	G	G	C	C	C	C	NA	NA	C	C
Triticum monococcum ssp. aegilopoides	Diploid	Wild einkorn	PI 427405	6	Iraq	G	G	G	C	C	C	C	C	C	C	C
Triticum monococcum ssp. aegilopoides	Diploid	Wild einkorn	PI 427645	6	Iraq	G	G	G	C	C	C	C	C	C	C	C
Triticum monococcum ssp. aegilopoides	Diploid	Wild einkorn	PI 427720	6	Iraq	G	G	G	C	C	C	C	C	C	C	NA
Triticum monococcum ssp. aegilopoides	Diploid	Wild einkorn	PI 427740	6	Iraq	G	G	G	NA	C	C	C	C	C	C	C
Triticum monococcum ssp. aegilopoides	Diploid	Wild einkorn	PI 427804	6	Iran	G	G	G	C	C	C	C	C	C	C	C
Triticum monococcum ssp. aegilopoides	Diploid	Wild einkorn	PI 427691	6	Iraq	G	G	G	NA	C	C	C	C	C	C	C
Triticum monococcum ssp. aegilopoides	Diploid	Wild einkorn	PI 427948	6	Iraq	G	G	G	C	C	C	C	C	C	C	C
Triticum monococcum ssp. aegilopoides	Diploid	Wild einkorn	PI 427999	6	Lebanon	G	G	G	C	C	C	C	C	C	C	C
Triticum monococcum ssp. aegilopoides	Diploid	Wild einkorn	PI 487249	6	Syria	G	G	G	C	C	C	C	C	C	C	C
Triticum monococcum ssp. aegilopoides	Diploid	Wild einkorn	PI 427992	6	Lebanon	G	G	G	C	C	C	C	C	C	C	C
Triticum monococcum ssp. aegilopoides	Diploid	Wild einkorn	PI 427990	6	Lebanon	G	G	G	C	C	C	C	C	C	C	C
Triticum monococcum ssp. aegilopoides	Diploid	Wild einkorn	PI 427994	6	Lebanon	G	G	G	C	C	C	C	C	C	C	C
Triticum monococcum ssp. aegilopoides	Diploid	Wild einkorn	PI 427996	6	Lebanon	G	G	G	C	C	C	C	C	C	C	C
Triticum monococcum ssp. monococcum	Diploid	Domesticated einkorn	PI 538722	6	Turkey	G	G	G	C	C	C	C	NA	C	C	C
Triticum monococcum ssp. monococcum	Diploid	Domesticated einkorn	PI 341413	6	Turkey	G	G	G	C	C	C	C	C	C	C	C
Triticum monococcum ssp. monococcum	Diploid	Domesticated einkorn	PI 307984	6	Morocco	G	G	G	C	C	C	C	C	C	C	C
Triticum monococcum ssp. monococcum	Diploid	Domesticated einkorn	PI 428174	6	Turkey	G	G	G	C	C	C	C	C	C	C	C
Triticum monococcum ssp. monococcum	Diploid	Domesticated einkorn	PI 167625	6	Turkey	G	G	G	C	C	C	C	NA	NA	C	C
Triticum monococcum ssp. monococcum	Diploid	Domesticated einkorn	PI 428167	6	Turkey	G	G	G	C	C	C	C	C	C	C	C
Triticum monococcum ssp. monococcum	Diploid	Domesticated einkorn	PI 191096	6	Spain	G	G	G	C	C	C	C	C	C	C	C
Triticum monococcum ssp. monococcum	Diploid	Domesticated einkorn	PI 167611	6	Turkey	G	G	G	C	C	C	C	C	C	C	C
Triticum monococcum ssp. monococcum	Diploid	Domesticated einkorn	PI 343181	6	Chile	G	G	G	NA	C	C	C	NA	C	NA	NA
Triticum monococcum ssp. monococcum	Diploid	Domesticated einkorn	PI 428154	6	Turkey	G	G	G	C	C	C	C	C	C	C	C
Triticum monococcum ssp. monococcum	Diploid	Domesticated einkorn	PI 428162	6	Turkey	G	G	G	C	C	C	C	C	C	C	C
Triticum monococcum ssp. monococcum	Diploid	Domesticated einkorn	PI 435001	6	Bosnia and Herzegovina	G	G	G	C	C	C	C	C	NA	C	C
Triticum monococcum ssp. monococcum	Diploid	Domesticated einkorn	PI 167591	6	Turkey	G	G	G	C	C	C	C	C	C	C	C
Triticum monococcum ssp. monococcum	Diploid	Domesticated einkorn	PI 119422	6	Turkey	G	G	G	C	C	C	C	C	C	C	C
Triticum monococcum ssp. monococcum	Diploid	Domesticated einkorn	PI 254195	6	Turkey	NA	G	G	C	C	C	C	C	C	C	C
Triticum monococcum ssp. monococcum	Diploid	Domesticated einkorn	PI 167627	6	Turkey	G	G	G	C	C	C	C	C	C	NA	C
Triticum monococcum ssp. monococcum	Diploid	Domesticated einkorn	PI 542474	6	Turkey	G	G	G	C	C	C	C	C	NA	NA	C
Triticum monococcum ssp. monococcum	Diploid	Domesticated einkorn	PI 362610	6	Macedonia	NA	G	G	C	C	C	C	NA	C	C	C
Triticum monococcum ssp. monococcum	Diploid	Domesticated einkorn	PI 427927	6	Iraq	G	G	G	NA	C	C	C	NA	C	C	C
Triticum monococcum ssp. monococcum	Diploid	Domesticated einkorn	PI 503874	6	South Africa	G	G	G	C	C	C	C	C	C	C	C
Triticum monococcum ssp. monococcum	Diploid	Domesticated einkorn	PI 94743	6	Russia	G	NA	G	C	C	C	C	G/C	C	C	C
Triticum monococcum ssp. monococcum	Diploid	Domesticated einkorn	PI 119435	6	Turkey	G	G	G	C	C	C	C	C	C	C	C
Triticum monococcum ssp. monococcum	Diploid	Domesticated einkorn	PI 573524	6	Turkey	G	G	G	C	C	C	C	C	C	C	C
Triticum monococcum ssp. monococcum	Diploid	Domesticated einkorn	PI 428175	6	Turkey	G	G	G	C	C	C	C	C	C	C	C
Triticum monococcum ssp. monococcum	Diploid	Domesticated einkorn	PI 352479	6	Turkey	G	G	G	C	C	C	C	C	C	C	C
Triticum monococcum ssp. monococcum	Diploid	Domesticated einkorn	CItr 14520	6	Canada	G	G	G	C	C	C	C	NA	C	C	C
Triticum monococcum ssp. monococcum	Diploid	Domesticated einkorn	TRI 18441	6	Turkey	G	G	G	C	C	C	C	C	C	C	C
Triticum monococcum ssp. monococcum	Diploid	Domesticated einkorn	TRI 19313	6	NA	G	G	G	C	C	C	C	C	C	C	C
Triticum monococcum ssp. monococcum	Diploid	Domesticated einkorn	TRI 18422	6	Turkey	G	G	G	C	C	C	C	C	C	C	C
Triticum monococcum ssp. monococcum	Diploid	Domesticated einkorn	A063	6	Turkey	G	NA	G	C	C	C	C	C	C	C	C
Triticum monococcum ssp. sinskajae	Diploid	Domesticated einkorn	TRI 11525	6	Russia	G	G	G	C	C	C	C	C	C	C	C
Triticum turgidum ssp. dicoccoides	Tetraploid	Wild emmer	PI 428016	6	Iran	G	G	G	C	C	C	C	G	C	C	C
Triticum turgidum ssp. dicoccoides	Tetraploid	Wild emmer	PI 466933	6	Syria	G	G	G	C	C	C	C	G	NA	C	C
Triticum turgidum ssp. dicoccoides	Tetraploid	Wild emmer	PI 466970	6	Israel	G	NA	G	C	C	C	C	G	C	C	C
Triticum turgidum ssp. dicoccoides	Tetraploid	Wild emmer	PI 471062	6	Israel	G	G	G	C	C	C	C	G	C	C	C
Triticum turgidum ssp. dicoccoides	Tetraploid	Wild emmer	PI 487254	6	Syria	NA	G	G	C	C	C	C	G	NA	NA	NA
Triticum turgidum ssp. dicoccoides	Tetraploid	Wild emmer	PI 466959	6	Israel	G	G	G	C	C	C	C	G	C	C	C
Triticum turgidum ssp. dicoccoides	Tetraploid	Wild emmer	PI 428107	6	Israel	G	G	G	C	C	C	C	G	C	C	C
Triticum turgidum ssp. dicoccoides	Tetraploid	Wild emmer	PI 466943	6	Syria	G	G	G	C	C	C	C	G	C	C	C
Triticum turgidum ssp. dicoccoides	Tetraploid	Wild emmer	PI 428138	6	Lebanon	G	G	G	C	C	C	C	G	C	C	C
Triticum turgidum ssp. dicoccoides	Tetraploid	Wild emmer	PI 428098	6	Israel	G	G	G	C	C	C	C	G	C	C	C
Triticum turgidum ssp. dicoccoides	Tetraploid	Wild emmer	PI 428041	6	Turkey	NA	G	G	NA	C	C	C	G	C	C	C
Triticum turgidum ssp. dicoccoides	Tetraploid	Wild emmer	PI 428127	6	Lebanon	G	G	G	C	C	C	C	G	C	C	C
Triticum turgidum ssp. dicoccoides	Tetraploid	Wild emmer	TRI 11505	6	Lebanon	G	G	G	C	C	C	C	G	C	C	C
Triticum turgidum ssp. dicoccoides	Tetraploid	Wild emmer	PI 470998	6	Israel	G	G	G	C	C	C	C	G	C	C	NA
Triticum turgidum ssp. dicoccoides	Tetraploid	Wild emmer	PI 487260	6	Syria	G	G	G	C	C	C	C	G	NA	C	C
Triticum turgidum ssp. dicoccoides	Tetraploid	Wild emmer	PI 428071	6	Turkey	G	G	G	C	C	C	C	G	C	C	C
Triticum turgidum ssp. dicoccoides	Tetraploid	Wild emmer	PI 466980	6	Israel	G	G	G	C	C	C	C	G	C	C	C
Triticum turgidum ssp. dicoccoides	Tetraploid	Wild emmer	PI 466987	6	Israel	G	G	G	C	C	C	C	G	C	C	C
Triticum turgidum ssp. dicoccoides	Tetraploid	Wild emmer	PI 538630	6	Turkey	NA	NA	G	C	C	C	C	G	C	C	C
Triticum turgidum ssp. dicoccoides	Tetraploid	Wild emmer	PI 538702	6	Lebanon	G	G	G	C	C	C	C	G	C	C	C
Triticum turgidum ssp. dicoccoides	Tetraploid	Wild emmer	PI 470991	6	Israel	G	G	G	C	C	C	C	G	C	C	C
Triticum turgidum ssp. dicoccoides	Tetraploid	Wild emmer	PI 428029	6	Turkey	G	G	G	C	C	C	C	G	C	C	C
Triticum turgidum ssp. dicoccoides	Tetraploid	Wild emmer	PI 428082	6	Turkey	G	G	G	C	C	C	C	G	C	C	C
Triticum turgidum ssp. dicoccoides	Tetraploid	Wild emmer	PI 466986	6	Israel	G	G	G	C	C	C	C	G	C	NA	C
Triticum turgidum ssp. dicoccoides	Tetraploid	Wild emmer	PI 471012	6	Israel	G	G	G	C	C	C	C	G	C	C	C
Triticum turgidum ssp. dicoccoides	Tetraploid	Wild emmer	PI 466934	6	Syria	G	G	G	C	C	C	C	G	C	C	C
Triticum turgidum ssp. dicoccoides	Tetraploid	Wild emmer	PI 428020	6	Turkey	G	G	G	C	C	C	C	G	C	C	C
Triticum turgidum ssp. dicoccoides	Tetraploid	Wild emmer	PI 466941	6	Syria	NA	NA	G	C	C	C	C	G	NA	NA	C
Triticum turgidum ssp. dicoccon	Tetraploid	Domesticated emmer	PI 479958	6	Ethiopia	G	G	G	C	C	C	C	G	C	C	C
Triticum turgidum ssp. dicoccon	Tetraploid	Domesticated emmer	PI 355484	6	Spain	G	G	G	C	C	C	C	G	C	C	C
Triticum turgidum ssp. dicoccon	Tetraploid	Domesticated emmer	PI 197492	6	Ethiopia	G	G	G	C	C	C	C	G	C	C	C
Triticum turgidum ssp. dicoccon	Tetraploid	Domesticated emmer	CItr 14824	6	Ethiopia	G	G	G	C	C	C	NA	G	C	C	C
Triticum turgidum ssp. dicoccon	Tetraploid	Domesticated emmer	PI 532305	6	Oman	NA	G	G	C	C	C	C	G	C	C	C
Triticum turgidum ssp. dicoccon	Tetraploid	Domesticated emmer	PI 532306	6	Ethiopia	G	G	G	C	C	C	C	G	C	C	C
Triticum turgidum ssp. dicoccon	Tetraploid	Domesticated emmer	PI 197488	6	Ethiopia	G	G	G	C	C	C	C	G	C	C	C
Triticum turgidum ssp. dicoccon	Tetraploid	Domesticated emmer	PI 534275	6	Ethiopia	G	NA	G	NA	C	C	C	G	C	C	C
Triticum turgidum ssp. dicoccon	Tetraploid	Domesticated emmer	CItr 14916	6	Ethiopia	NA	G	G	C	C	C	C	G	C	C	NA
Triticum turgidum ssp. dicoccon	Tetraploid	Domesticated emmer	PI 254192	6	Serbia	G	G	G	C	C	C	C	G	C	C	C
Triticum turgidum ssp. dicoccon	Tetraploid	Domesticated emmer	PI 197481	6	Ethiopia	G	G	G	C	C	C	C	G	C	C	C
Triticum turgidum ssp. dicoccon	Tetraploid	Domesticated emmer	PI 196905	6	Ethiopia	G	NA	G	C	C	C	C	G	C	C	C
Triticum turgidum ssp. dicoccon	Tetraploid	Domesticated emmer	PI 197484	6	Ethiopia	G	G	G	C	C	C	C	G	C	C	C
Triticum turgidum ssp. dicoccon	Tetraploid	Domesticated emmer	PI 266842	6	United Kingdom	G	G	G	C	C	C	C	G	C	C	C
Triticum turgidum ssp. dicoccon	Tetraploid	Domesticated emmer	CItr 7966	6	Ethiopia	G	NA	G	C	C	C	C	G	C	C	C
Triticum turgidum ssp. dicoccon	Tetraploid	Domesticated emmer	CItr 3686	6	America	G	G	G	C	C	C	C	G	C	C	C
Triticum turgidum ssp. dicoccon	Tetraploid	Domesticated emmer	PI 479968	6	Ethiopia	G	G	G	C	C	C	C	G	C	C	C
Triticum turgidum ssp. dicoccon	Tetraploid	Domesticated emmer	PI 94656	6	Serbia	G	G	G	C	C	C	C	NA	NA	NA	C
Triticum turgidum ssp. dicoccon	Tetraploid	Domesticated emmer	PI 626391	6	Iran	NA	G	G	C	C	C	C	G	C	C	NA
Triticum turgidum ssp. dicoccon	Tetraploid	Domesticated emmer	PI 480465	6	Ethiopia	G	G	G	C	C	C	C	G	C	C	C
Triticum turgidum ssp. dicoccon	Tetraploid	Domesticated emmer	PI 362696	6	Montenegro	G	G	G	C	C	C	C	G	C	C	C
Triticum turgidum ssp. dicoccon	Tetraploid	Domesticated emmer	PI 94668	6	Russia	G	G	G	C	C	C	C	G	C	C	C
Triticum turgidum ssp. dicoccon	Tetraploid	Domesticated emmer	PI 254190	6	Russia	G	G	G	C	C	C	C	G	C	C	NA
Triticum turgidum ssp. dicoccon	Tetraploid	Domesticated emmer	PI 349045	6	Russia	G	G	G	C	C	C	C	G	C	C	C
Triticum turgidum ssp. dicoccon	Tetraploid	Domesticated emmer	PI 254191	6	Russia	G	G	G	C	C	C	C	G	C	C	C
Triticum turgidum ssp. dicoccon	Tetraploid	Domesticated emmer	PI 58788	6	Ethiopia	G	G	G	C	C	C	C	G	C	C	C
Triticum turgidum ssp. dicoccon	Tetraploid	Domesticated emmer	PI 624908	6	Iran	NA	G	G	C	C	C	C	G	C	C	NA
Triticum turgidum ssp. dicoccon	Tetraploid	Domesticated emmer	PI 499973	6	Armenia	G	G	G	C	C	C	C	G	C	C	C
Triticum turgidum ssp. dicoccon	Tetraploid	Domesticated emmer	PI 624904	6	Iran	G	G	G	C	C	C	C	G	C	C	C
Triticum turgidum ssp. ispahanicum	Tetraploid	Ispahanicum (Ispahan emmer)	KU-4580	6	Iran	G	NA	G	NA	C	C	C	G	C	C	C
Triticum turgidum ssp. ispahanicum	Tetraploid	Ispahanicum (Ispahan emmer)	PI 294477	6	France	G	G	G	C	C	C	C	G	C	C	C
Triticum turgidum ssp. ispahanicum	Tetraploid	Ispahanicum (Ispahan emmer)	PI 352493	6	Iran	G	G	G	C	C	C	C	G	NA	C	C
Triticum turgidum ssp. ispahanicum	Tetraploid	Ispahanicum (Ispahan emmer)	PI 294478	6	France	G	G	G	C	C	C	C	G	C	C	NA
Triticum turgidum ssp. ispahanicum	Tetraploid	Ispahanicum (Ispahan emmer)	PI 330548	6	Iran	G	NA	G	C	C	C	NA	G	C	C	C
Triticum turgidum ssp. ispahanicum	Tetraploid	Ispahanicum (Ispahan emmer)	KU-145	6	Iran	G	G	G	C	C	C	NA	G	C	C	C
Triticum turgidum ssp. ispahanicum	Tetraploid	Ispahanicum (Ispahan emmer)	TRI 6177	6	Iran	NA	G	G	C	C	C	C	G	C	C	C
Triticum turgidum ssp. karamyschevii	Tetraploid	Georgian wheat (Colchic emmer)	TRI 4568	6	Georgia	G	G	G	C	C	C	C	G	C	C	C
Triticum turgidum ssp. karamyschevii	Tetraploid	Georgian wheat (Colchic emmer)	TRI 11946	6	Georgia	G	NA	G	C	C	C	C	G	NA	C	C
Triticum turgidum ssp. karamyschevii	Tetraploid	Georgian wheat (Colchic emmer)	TRI 12750	6	Georgia	G	G	G	C	C	C	C	G	C	C	C
Triticum aestivum ssp. spelta	Hexaploid	Spelt	PI 591898	6	Switzerland	G	G	G	C	C	C	C	G	C	C	C
Triticum aestivum ssp. spelta	Hexaploid	Spelt	PI 347913	6	Switzerland	G	G	G	C	C	C	C	G	C	C	C
Triticum aestivum ssp. spelta	Hexaploid	Spelt	PI 347921	6	Switzerland	NA	G	G	C	C	C	NA	NA	NA	C	C
Triticum aestivum ssp. spelta	Hexaploid	Spelt	PI 348526	6	Spain	G	G	G	C	C	C	C	G	C	C	C
Triticum aestivum ssp. spelta	Hexaploid	Spelt	PI 355592	6	Switzerland	G	G	G	C	C	C	C	G	C	C	C
Triticum aestivum ssp. spelta	Hexaploid	Spelt	PI 306553	6	Romania	G	G	G	C	C	C	C	G	C	C	C
Triticum aestivum ssp. spelta	Hexaploid	Spelt	PI 348168	6	Germany	G	G	G	C	C	C	C	G	C	C	C
Triticum aestivum ssp. spelta	Hexaploid	Spelt	PI 168680	6	America	G	G	G	C	C	C	C	G	C	C	C
Triticum aestivum ssp. spelta	Hexaploid	Spelt	PI 272576	6	Hungary	G	G	G	C	C	C	C	G	NA	C	C
Triticum aestivum ssp. spelta	Hexaploid	Spelt	PI 348349	6	Belgium	G	G	G	C	C	C	C	G	C	C	C
Triticum aestivum ssp. spelta	Hexaploid	Spelt	PI 615249	6	Belgium	G	G	G	C	C	C	C	G	C	C	C
Triticum aestivum ssp. spelta	Hexaploid	Spelt	PI 348303	6	Belgium	G	G	G	C	C	C	C	G	C	C	C
Triticum aestivum ssp. spelta	Hexaploid	Spelt	PI 272573	6	Hungary	G	G	G	C	C	C	C	G	C	C	C
Triticum aestivum ssp. spelta	Hexaploid	Spelt	PI 306554	6	Romania	NA	G	G	NA	C	C	C	G	C	C	C
Triticum aestivum ssp. macha	Hexaploid	Macha	T1240001	6	NA	G	NA	G	C	C	C	C	G	C	C	NA
Triticum aestivum ssp. macha	Hexaploid	Macha	PI 272555	6	Hungary	G	G	G	C	C	C	C	G	C	C	C
Triticum aestivum ssp. macha	Hexaploid	Macha	PI 572910	6	Georgia	G	G	G	C	C	C	C	G	C	C	C
Triticum aestivum ssp. macha	Hexaploid	Macha	PI 572909	6	Georgia	G	G	G	C	C	C	C	G	C	C	C
Triticum aestivum ssp. macha	Hexaploid	Macha	TRI 13602	6	Georgia	G	G	G	C	C	C	C	G	C	C	C
Triticum aestivum ssp. vavilovii	Hexaploid	Vavilov wheat	KU-3848	6	Turkey	G	G	G	C	C	C	C	G	C	C	C
Triticum aestivum ssp. vavilovii	Hexaploid	Vavilov wheat	TRI 9416	6	Soviet Union	G	G	G	C	C	C	C	NA	C	C	C
Triticum aestivum ssp. vavilovii	Hexaploid	Vavilov wheat	TRI 7315	6	Armenia	G	G	G	C	C	C	NA	G	NA	NA	C
Triticum aestivum ssp. vavilovii	Hexaploid	Vavilov wheat	TRI 4630	6	China	G	G	G	C	C	C	C	G	C	C	C
Triticum aestivum ssp. vavilovii	Hexaploid	Vavilov wheat	TRI 11556	6	Soviet Union	G	G	G	C	C	C	C	G	C	C	C
Triticum aestivum ssp. tibeticum	Hexaploid	Tibetan semi wild wheat	XM1232	6	China	G	G	G	NA	C	C	C	G	C	C	C
Triticum aestivum ssp. tibeticum	Hexaploid	Tibetan semi wild wheat	XM1247	6	China	NA	NA	G	C	C	C	C	G	C	C	C
Triticum aestivum ssp. tibeticum	Hexaploid	Tibetan semi wild wheat	XM1222	6	China	G	NA	G	NA	C	C	NA	G	C	C	C
Triticum aestivum ssp. tibeticum	Hexaploid	Tibetan semi wild wheat	XM1378	6	China	G	G	G	C	C	C	NA	G	C	C	C
Triticum aestivum ssp. tibeticum	Hexaploid	Tibetan semi wild wheat	XM1379	6	China	G	G	G	NA	C	C	C	NA	C	C	C
Triticum aestivum ssp. yunnanese	Hexaploid	Yunan wheat	XM0929	6	China	NA	G	G	NA	C	C	C	G	C	C	C
Triticum aestivum ssp. yunnanese	Hexaploid	Yunan wheat	XM0932	6	China	G	G	G	C	C	C	C	G	C	C	C
Triticum aestivum ssp. yunnanese	Hexaploid	Yunan wheat	XM0939	6	China	G	G	G	C	C	C	C	G	C	C	C
Triticum aestivum ssp. yunnanese	Hexaploid	Yunan wheat	XM0909	6	China	G	G	G	C	C	C	C	G	C	C	C
Triticum aestivum ssp. yunnanese	Hexaploid	Yunan wheat	XM0920	6	China	NA	NA	G	C	C	C	C	G	C	C	NA
Triticum turgidum ssp. durum	Tetraploid	Durum	PI 178143	6	Turkey	G	G	G	C	C	C	C	G	C	C	C
Triticum turgidum ssp. durum	Tetraploid	Durum	PI 24493	6	Turkmenistan	G	G	G	C	C	C	C	G	C	NA	NA
Triticum turgidum ssp. durum	Tetraploid	Durum	PI 623461	6	Iran	G	G	G	C	C	C	C	G	C	C	C
Triticum turgidum ssp. durum	Tetraploid	Durum	PI 627514	6	Iran	G	G	G	C	C	C	C	G	C	C	C
Triticum turgidum ssp. durum	Tetraploid	Durum	PI 625273	6	Iran	G	G	G	C	C	C	C	G	NA	NA	C
Triticum turgidum ssp. durum	Tetraploid	Durum	PI 627996	6	Iran	G	NA	G	C	C	C	C	G	C	C	C
Triticum turgidum ssp. durum	Tetraploid	Durum	PI 624129	6	Iran	G	G	G	C	C	C	C	G	C	C	C
Triticum turgidum ssp. durum	Tetraploid	Durum	PI 626483	6	Iran	G	G	G	C	C	C	C	G	C	C	C
Triticum turgidum ssp. durum	Tetraploid	Durum	PI 627942	6	Iran	G	G	G	C	C	C	C	G	C	C	C
Triticum turgidum ssp. durum	Tetraploid	Durum	PI 32877	6	Kazakhstan	G	G	G	C	C	C	C	G	C	NA	C
Triticum turgidum ssp. durum	Tetraploid	Durum	PI 624388	6	Iran	G	G	G	C	C	C	C	G	C	C	C
Triticum turgidum ssp. durum	Tetraploid	Durum	PI 166327	6	Turkey	NA	G	G	C	C	C	C	G	NA	C	C
Triticum turgidum ssp. durum	Tetraploid	Durum	PI 192051	6	Portugal	G	G	G	C	C	C	C	G	C	C	C
Triticum turgidum ssp. turanicum	Tetraploid	Khorasan wheat	PI 317492	6	Afghanistan	G	G	G	C	C	C	C	G	C	C	C
Triticum turgidum ssp. turanicum	Tetraploid	Khorasan wheat	PI 272602	6	Hungary	G	NA	G	C	C	C	C	G	C	C	C
Triticum turgidum ssp. turanicum	Tetraploid	Khorasan wheat	PI 184543	6	Portugal	G	G	G	C	C	C	C	G	C	C	C
Triticum turgidum ssp. turanicum	Tetraploid	Khorasan wheat	PI 347132	6	Afghanistan	G	G	G	C	C	C	C	G	C	C	C
Triticum turgidum ssp. turanicum	Tetraploid	Khorasan wheat	PI 624422	6	Iran	NA	G	G	C	C	C	C	G	C	C	C
Triticum turgidum ssp. turanicum	Tetraploid	Khorasan wheat	PI 624421	6	Iran	NA	G	G	C	C	C	C	G	NA	C	C
Triticum turgidum ssp. turanicum	Tetraploid	Khorasan wheat	PI 624892	6	Iran	G	NA	G	NA	C	C	C	G	C	NA	C
Triticum turgidum ssp. turanicum	Tetraploid	Khorasan wheat	PI 166959	6	Turkey	G	G	G	C	C	C	C	G	C	C	NA
Triticum turgidum ssp. turanicum	Tetraploid	Khorasan wheat	PI 166450	6	Turkey	G	G	G	NA	C	C	C	G	C	C	C
Triticum turgidum ssp. turanicum	Tetraploid	Khorasan wheat	PI 537992	6	Turkey	G	G	G	C	C	C	C	G	C	C	C
Triticum turgidum ssp. carthlicum	Tetraploid	Persian wheat	PI 168672	6	China	G	G	G	NA	C	C	NA	G	NA	NA	C
Triticum turgidum ssp. carthlicum	Tetraploid	Persian wheat	PI 272521	6	Hungary	G	G	G	C	C	C	C	G	C	C	C
Triticum turgidum ssp. carthlicum	Tetraploid	Persian wheat	PI 470733	6	Turkey	G	G	G	C	C	C	C	G	C	C	C
Triticum turgidum ssp. carthlicum	Tetraploid	Persian wheat	PI 94752	6	Georgia	G	G	G	C	C	C	C	G	C	C	C
Triticum turgidum ssp. carthlicum	Tetraploid	Persian wheat	PI 94751	6	Georgia	G	G	G	C	C	C	C	G	C	C	C
Triticum turgidum ssp. carthlicum	Tetraploid	Persian wheat	PI 470731	6	Turkey	G	G	G	C	C	C	C	G	C	C	C
Triticum turgidum ssp. carthlicum	Tetraploid	Persian wheat	PI 94748	6	Georgia	G	G	G	C	C	C	C	G	C	C	C
Triticum turgidum ssp. carthlicum	Tetraploid	Persian wheat	PI 532486	6	Turkey	G	NA	G	C	C	C	C	G	C	C	C
Triticum turgidum ssp. carthlicum	Tetraploid	Persian wheat	PI 585017	6	Georgia	G	G	G	C	C	C	C	NA	C	C	C
Triticum turgidum ssp. polonicum	Tetraploid	Polish wheat	PI 384337	6	Ethiopia	G	G	G	C	C	C	C	G	C	NA	NA
Triticum turgidum ssp. polonicum	Tetraploid	Polish wheat	PI 191823	6	Portugal	G	NA	G	C	C	C	NA	G	C	C	C
Triticum turgidum ssp. polonicum	Tetraploid	Polish wheat	PI 272572	6	Hungary	G	G	G	C	C	C	C	G	C	C	C
Triticum turgidum ssp. polonicum	Tetraploid	Polish wheat	CItr 14892	6	Ethiopia	G	G	G	C	C	C	C	G	C	C	C
Triticum turgidum ssp. polonicum	Tetraploid	Polish wheat	PI 384344	6	Ethiopia	G	G	G	C	C	C	C	G	C	C	C
Triticum turgidum ssp. polonicum	Tetraploid	Polish wheat	PI 254214	6	India	G	G	G	C	C	C	C	G	C	C	C
Triticum turgidum ssp. polonicum	Tetraploid	Polish wheat	PI 384342	6	Ethiopia	G	G	G	C	C	C	C	G	C	C	C
Triticum turgidum ssp. polonicum	Tetraploid	Polish wheat	PI 272568	6	Hungary	NA	G	G	C	C	C	C	G	C	C	C
Triticum turgidum ssp. polonicum	Tetraploid	Polish wheat	PI 167622	6	Turkey	G	G	G	C	C	C	C	G	NA	C	C
Triticum turgidum ssp. polonicum	Tetraploid	Polish wheat	PI 191903	6	Portugal	G	G	G	C	C	C	C	G	C	C	C
Triticum turgidum ssp. turgidum	Tetraploid	Rivet wheat	PI 341300	6	Turkey	G	G	G	NA	C	C	C	G	C	C	C
Triticum turgidum ssp. turgidum	Tetraploid	Rivet wheat	PI 272592	6	Hungary	G	G	G	C	C	C	C	G	C	C	C
Triticum turgidum ssp. turgidum	Tetraploid	Rivet wheat	CItr 7798	6	Ethiopia	G	G	G	C	C	C	C	G	NA	C	C
Triticum turgidum ssp. turgidum	Tetraploid	Rivet wheat	PI 272587	6	Hungary	G	G	G	NA	C	C	C	G	C	C	C
Triticum turgidum ssp. turgidum	Tetraploid	Rivet wheat	PI 378473	6	Macedonia	G	NA	G	C	C	C	C	NA	NA	C	C
Triticum turgidum ssp. turgidum	Tetraploid	Rivet wheat	PI 374659	6	Macedonia	G	G	G	C	C	C	C	G	C	C	C
Triticum turgidum ssp. turgidum	Tetraploid	Rivet wheat	PI 166484	6	Turkey	G	NA	G	C	C	C	NA	G	C	C	C
Triticum turgidum ssp. turgidum	Tetraploid	Rivet wheat	PI 41029	6	Georgia	G	G	G	C	C	C	NA	G	C	C	C
Triticum turgidum ssp. turgidum	Tetraploid	Rivet wheat	PI 620972	6	Iran	G	G	G	C	C	C	C	G	C	C	C
Triticum turgidum ssp. turgidum	Tetraploid	Rivet wheat	PI 245751	6	Turkey	G	G	G	C	C	C	C	G	C	C	C
Triticum turgidum ssp. turgidum	Tetraploid	Rivet wheat	PI 341611	6	Turkey	G	G	G	C	C	C	C	G	NA	C	C
Triticum turgidum ssp. turgidum	Tetraploid	Rivet wheat	PI 60715	6	Egypt	G	G	G	C	C	C	C	G	C	C	C
Triticum aestivum ssp. aestivum	Hexaploid	Landrace	PI 80741	6	Afghanistan	G	G	G	C	C	C	C	G	C	C	C
Triticum aestivum ssp. aestivum	Hexaploid	Landrace	PI 127098	6	Afghanistan	G	G	G	C	C	C	C	G	C	C	C
Triticum aestivum ssp. aestivum	Hexaploid	Landrace	PI 366569	6	Afghanistan	G	G	G	C	C	C	C	G	C	C	C
Triticum aestivum ssp. aestivum	Hexaploid	Landrace	PI 351046	6	Austria	G	G	G	C	C	C	C	G	C	C	C
Triticum aestivum ssp. aestivum	Hexaploid	Landrace	BDHHM	6	China	G	G	G	C	C	C	C	G	C	C	C
Triticum aestivum ssp. aestivum	Hexaploid	Landrace	PI 184157	6	Bosnia and Herzegovina	G	G	G	C	C	C	C	G	C	C	C
Triticum aestivum ssp. aestivum	Hexaploid	Landrace	BMZ	6	China	G	G	G	C	C	C	C	G	C	C	NA
Triticum aestivum ssp. aestivum	Hexaploid	Landrace	BQM	6	China	G	G	G	C	C	C	C	G	C	C	C
Triticum aestivum ssp. aestivum	Hexaploid	Landrace	PI 153785	6	Brazil	G	G	G	C	C	C	C	G	C	C	C
Triticum aestivum ssp. aestivum	Hexaploid	Landrace	BYM	6	China	G	G	G	C	C	C	C	G	C	C	C
Triticum aestivum ssp. aestivum	Hexaploid	Landrace	PI 349442	6	Switzerland	G	G	G	C	C	C	C	G	C	C	C
Triticum aestivum ssp. aestivum	Hexaploid	Landrace	CYHM	6	China	G	G	G	C	C	C	C	G	C	C	C
Triticum aestivum ssp. aestivum	Hexaploid	Landrace	DEU-L1	6	China	G	G	G	C	C	C	C	G	C	C	C
Triticum aestivum ssp. aestivum	Hexaploid	Landrace	PI 278249	6	Germany	G	G	G	C	C	C	C	G	C	C	C
Triticum aestivum ssp. aestivum	Hexaploid	Landrace	DHM	6	China	G	G	G	C	C	C	C	G	C	C	C
Triticum aestivum ssp. aestivum	Hexaploid	Landrace	DKM	6	China	G	G	G	C	C	C	C	G	C	C	C
Triticum aestivum ssp. aestivum	Hexaploid	Landrace	DXHKYM	6	China	G	G	G	C	C	C	C	G	C	C	C
Triticum aestivum ssp. aestivum	Hexaploid	Landrace	DYH	6	China	G	G	G	C	C	C	C	G	C	C	C
Triticum aestivum ssp. aestivum	Hexaploid	Landrace	PI 58075	6	Spain	G	G	G	C	C	C	C	G	C	C	C
Triticum aestivum ssp. aestivum	Hexaploid	Landrace	CItr 9358	6	Finland	G	G	G	C	C	C	C	G	C	C	C
Triticum aestivum ssp. aestivum	Hexaploid	Landrace	PI 278589	6	United Kingdom	G	G	G	C	C	C	C	G	C	C	C
Triticum aestivum ssp. aestivum	Hexaploid	Landrace	PI 57157	6	Georgia	G	G	G	C	C	C	C	G	C	C	C
Triticum aestivum ssp. aestivum	Hexaploid	Landrace	PI 43250	6	Greece	G	G	G	C	C	C	C	G	C	C	C
Triticum aestivum ssp. aestivum	Hexaploid	Landrace	HCM	6	China	G	G	G	C	C	C	C	G	C	C	C
Triticum aestivum ssp. aestivum	Hexaploid	Landrace	HLM	6	China	G	G	G	C	C	C	C	G	C	C	C
Triticum aestivum ssp. aestivum	Hexaploid	Landrace	HM	6	China	G	G	G	C	C	C	C	G	C	C	C
Triticum aestivum ssp. aestivum	Hexaploid	Landrace	HMM	6	China	G	G	G	C	C	C	C	G	C	C	C
Triticum aestivum ssp. aestivum	Hexaploid	Landrace	PI 264961	6	Croatia	G	G	G	C	C	C	C	G	C	C	C
Triticum aestivum ssp. aestivum	Hexaploid	Landrace	HTZ	6	China	G	G	G	C	C	C	C	G	C	C	C
Triticum aestivum ssp. aestivum	Hexaploid	Landrace	PI 272374	6	Hungary	G	G	G	C	C	C	C	G	C	C	C
Triticum aestivum ssp. aestivum	Hexaploid	Landrace	HZB	6	China	G	G	G	C	C	C	C	G	C	C	C
Triticum aestivum ssp. aestivum	Hexaploid	Landrace	PI 57902	6	India	G	G	G	C	C	C	C	G	C	C	C
Triticum aestivum ssp. aestivum	Hexaploid	Landrace	PI 430032	6	India	G	G	G	C	C	C	C	G	C	C	C
Triticum aestivum ssp. aestivum	Hexaploid	Landrace	PI 45325	6	Iran	G	G	G	C	C	C	C	G	C	C	C
Triticum aestivum ssp. aestivum	Hexaploid	Landrace	PI 268312	6	Iran	G	G	G	C	C	C	C	G	C	C	C
Triticum aestivum ssp. aestivum	Hexaploid	Landrace	PI 627954	6	Iran	G	G	G	C	C	C	C	G	C	C	C
Triticum aestivum ssp. aestivum	Hexaploid	Landrace	PI 628129	6	Iran	G	G	G	C	C	C	C	G	C	C	C
Triticum aestivum ssp. aestivum	Hexaploid	Landrace	PI 70705	6	Iraq	G	G	G	C	C	C	C	G	C	C	C
Triticum aestivum ssp. aestivum	Hexaploid	Landrace	PI 208895	6	Iraq	G	G	G	C	C	C	C	G	C	C	C
Triticum aestivum ssp. aestivum	Hexaploid	Landrace	PI 208899	6	Iraq	G	G	G	C	C	C	C	G	C	C	C
Triticum aestivum ssp. aestivum	Hexaploid	Landrace	PI 208900	6	Iraq	G	G	G	C	C	C	C	G	C	C	C
Triticum aestivum ssp. aestivum	Hexaploid	Landrace	PI 65564	6	Italy	G	G	G	C	C	C	C	G	C	C	C
Triticum aestivum ssp. aestivum	Hexaploid	Landrace	PI 157949	6	Italy	G	G	G	C	C	C	C	G	C	C	C
Triticum aestivum ssp. aestivum	Hexaploid	Landrace	JM	6	China	G	G	G	C	C	C	C	G	C	C	C
Triticum aestivum ssp. aestivum	Hexaploid	Landrace	PI 191347	6	Japan	G	G	G	C	C	C	C	G	C	C	C
Triticum aestivum ssp. aestivum	Hexaploid	Landrace	JiaHM	6	China	G	G	G	C	C	C	C	G	C	C	C
Triticum aestivum ssp. aestivum	Hexaploid	Landrace	JinHM	6	China	G	G	G	C	C	C	C	G	C	C	C
Triticum aestivum ssp. aestivum	Hexaploid	Landrace	PI 639304	6	Kazakhstan	G	G	G	C	C	C	C	G	C	C	C
Triticum aestivum ssp. aestivum	Hexaploid	Landrace	KSBP	6	China	G	G	G	C	C	C	C	G	C	C	C
Triticum aestivum ssp. aestivum	Hexaploid	Landrace	LGD	6	China	G	G	G	C	C	C	C	G	C	C	C
Triticum aestivum ssp. aestivum	Hexaploid	Landrace	LLX	6	China	G	G	G	C	C	C	C	G	C	C	C
Triticum aestivum ssp. aestivum	Hexaploid	Landrace	LM	6	China	G	G	G	C	C	C	C	G	C	C	C
Triticum aestivum ssp. aestivum	Hexaploid	Landrace	LTT	6	China	G	G	G	C	C	C	C	G	C	C	C
Triticum aestivum ssp. aestivum	Hexaploid	Landrace	LXZXM	6	China	G	G	G	C	C	C	C	G	C	C	C
Triticum aestivum ssp. aestivum	Hexaploid	Landrace	LZT	6	China	G	G	G	C	C	C	C	G	C	C	C
Triticum aestivum ssp. aestivum	Hexaploid	Landrace	CItr 2804	6	Mexico	G	G	G	C	C	C	C	G	C	C	C
Triticum aestivum ssp. aestivum	Hexaploid	Landrace	PI 345238	6	Macedonia	G	G	G	C	C	C	C	G	C	C	C
Triticum aestivum ssp. aestivum	Hexaploid	Landrace	MXM	6	China	G	G	G	C	C	C	C	G	C	C	C
Triticum aestivum ssp. aestivum	Hexaploid	Landrace	PI 51688	6	NEthiopiaerlands	G	G	G	C	C	C	C	G	C	C	C
Triticum aestivum ssp. aestivum	Hexaploid	Landrace	PI 40944	6	Pakistan	G	G	G	C	C	C	C	G	C	C	C
Triticum aestivum ssp. aestivum	Hexaploid	Landrace	PI 40956	6	Pakistan	G	G	G	C	C	C	C	G	C	C	C
Triticum aestivum ssp. aestivum	Hexaploid	Landrace	PI 40967	6	Pakistan	G	G	G	C	C	C	C	G	C	C	C
Triticum aestivum ssp. aestivum	Hexaploid	Landrace	PI 192808	6	Portugal	G	G	G	C	C	C	C	G	C	C	C
Triticum aestivum ssp. aestivum	Hexaploid	Landrace	QCM	6	China	G	G	G	C	C	C	C	G	C	C	C
Triticum aestivum ssp. aestivum	Hexaploid	Landrace	CItr 2608	6	Romania	G	G	G	C	C	C	C	G	C	C	C
Triticum aestivum ssp. aestivum	Hexaploid	Landrace	CItr 11478	6	Soviet Union	G	G	G	C	C	C	C	G	C	C	C
Triticum aestivum ssp. aestivum	Hexaploid	Landrace	SLZ	6	China	G	G	G	C	C	C	C	G	C	C	C
Triticum aestivum ssp. aestivum	Hexaploid	Landrace	SM	6	China	G	G	G	C	C	C	C	G	C	C	C
Triticum aestivum ssp. aestivum	Hexaploid	Landrace	PI 184168	6	Serbia	G	G	G	C	C	C	C	G	C	C	C
Triticum aestivum ssp. aestivum	Hexaploid	Landrace	SRM4H	6	China	G	G	G	C	C	C	C	G	C	C	C
Triticum aestivum ssp. aestivum	Hexaploid	Landrace	PI 192569	6	Sweden	G	G	G	C	C	C	C	G	C	C	C
Triticum aestivum ssp. aestivum	Hexaploid	Landrace	PI 182707	6	Syria	G	G	G	C	C	C	C	G	C	C	C
Triticum aestivum ssp. aestivum	Hexaploid	Landrace	PI 278547	6	Syria	G	G	G	C	C	C	C	G	C	C	C
Triticum aestivum ssp. aestivum	Hexaploid	Landrace	TJBXM	6	China	G	G	G	C	C	C	C	G	C	C	C
Triticum aestivum ssp. aestivum	Hexaploid	Landrace	PI 639416	6	Tajikistan	G	G	G	C	C	C	C	G	C	C	C
Triticum aestivum ssp. aestivum	Hexaploid	Landrace	TMM	6	China	G	G	G	C	C	C	C	G	C	C	C
Triticum aestivum ssp. aestivum	Hexaploid	Landrace	PI 165114	6	Turkey	G	G	G	C	C	C	C	G	C	C	C
Triticum aestivum ssp. aestivum	Hexaploid	Landrace	PI 166346	6	Turkey	G	G	G	C	C	C	C	G	C	C	C
Triticum aestivum ssp. aestivum	Hexaploid	Landrace	PI 166770	6	Turkey	G	G	G	C	C	C	C	G	C	C	C
Triticum aestivum ssp. aestivum	Hexaploid	Landrace	PI 470581	6	Turkey	G	G	G	C	C	C	C	G	C	C	C
Triticum aestivum ssp. aestivum	Hexaploid	Landrace	PI 583718	6	Canada	G	G	G	C	C	C	C	G	C	C	C
Triticum aestivum ssp. aestivum	Hexaploid	Landrace	PI 481712	6	Bhutan	G	G	G	C	C	C	C	G	C	C	C
Triticum aestivum ssp. aestivum	Hexaploid	Landrace	PI 345409	6	Bosnia and Herzegovina	G	G	G	C	C	C	C	G	C	C	C
Triticum aestivum ssp. aestivum	Hexaploid	Landrace	PI 153785	6	Brazil	G	G	G	C	C	C	C	G	C	C	C
Triticum aestivum ssp. aestivum	Hexaploid	Landrace	PI 52227	6	Sudan	G	G	G	C	C	C	C	G	C	C	C
Triticum aestivum ssp. aestivum	Hexaploid	Landrace	PI 41021	6	Ukraine	G	G	G	C	C	C	C	G	C	C	C
Triticum aestivum ssp. aestivum	Hexaploid	Landrace	PI 94468	6	Ukraine	G	G	G	C	C	C	C	G	C	C	C
Triticum aestivum ssp. aestivum	Hexaploid	Landrace	PI 43344	6	Uruguay	G	G	G	C	C	C	C	G	C	C	C
Triticum aestivum ssp. aestivum	Hexaploid	Landrace	PI 43364	6	Uruguay	G	G	G	C	C	C	C	G	C	C	C
Triticum aestivum ssp. aestivum	Hexaploid	Landrace	PI 94532	6	Uzbekistan	G	G	G	C	C	C	C	G	C	C	C
Triticum aestivum ssp. aestivum	Hexaploid	Landrace	WYM	6	China	G	G	G	C	C	C	C	G	C	C	C
Triticum aestivum ssp. aestivum	Hexaploid	Landrace	XFS	6	China	G	G	G	C	C	C	C	G	C	C	C
Triticum aestivum ssp. aestivum	Hexaploid	Landrace	XHP	6	China	G	G	G	C	C	C	C	G	C	C	C
Triticum aestivum ssp. aestivum	Hexaploid	Landrace	YM	6	China	G	G	G	C	C	C	C	G	C	C	C
Triticum aestivum ssp. aestivum	Hexaploid	Landrace	YMBF	6	China	G	G	G	C	C	C	C	G	C	C	C
Triticum aestivum ssp. aestivum	Hexaploid	Landrace	YZM	6	China	G	G	G	C	C	C	C	G	C	C	C
Triticum aestivum ssp. aestivum	Hexaploid	Landrace	ZJH	6	China	G	G	G	C	C	C	C	G	C	C	C
Triticum aestivum ssp. aestivum	Hexaploid	Landrace	ZP	6	China	G	G	G	C	C	C	C	G	C	C	C
Triticum aestivum ssp. aestivum	Hexaploid	Landrace	ZWT	6	China	G	G	G	C	C	C	C	G	C	C	C
Triticum aestivum ssp. aestivum	Hexaploid	Cultivar	AMN	6	China	G	G	G	C	C	C	C	G	C	C	C
Triticum aestivum ssp. aestivum	Hexaploid	Cultivar	BJBH	6	China	G	G	G	C	C	C	C	G	C	C	C
Triticum aestivum ssp. aestivum	Hexaploid	Cultivar	CAN-C1	6	Canada	G	G	G	C	C	C	C	G	C	C	C
Triticum aestivum ssp. aestivum	Hexaploid	Cultivar	CItr 14038/PI 298407	6	Chile	G	G	G	C	C	C	C	G	C	C	C
Triticum aestivum ssp. aestivum	Hexaploid	Cultivar	CZ6406	6	China	G	G	G	C	C	C	C	G	C	C	C
Triticum aestivum ssp. aestivum	Hexaploid	Cultivar	FMSY	6	China	G	G	G	C	C	C	C	G	C	C	C
Triticum aestivum ssp. aestivum	Hexaploid	Cultivar	FRA-C1	6	France	G	G	G	C	C	C	C	G	C	C	C
Triticum aestivum ssp. aestivum	Hexaploid	Cultivar	GYWLL	6	China	G	G	G	C	C	C	C	G	C	C	C
Triticum aestivum ssp. aestivum	Hexaploid	Cultivar	HNSH	6	China	G	G	G	C	C	C	NA	G	C	C	C
Triticum aestivum ssp. aestivum	Hexaploid	Cultivar	PI 231372	6	Italy	G	G	G	C	C	C	C	G	C	C	C
Triticum aestivum ssp. aestivum	Hexaploid	Cultivar	JCYLYL	6	China	G	G	G	C	C	C	C	G	C	C	C
Triticum aestivum ssp. aestivum	Hexaploid	Cultivar	JM8H	6	China	G	G	G	C	C	C	C	G	C	C	C
Triticum aestivum ssp. aestivum	Hexaploid	Cultivar	KFEH	6	China	G	G	G	C	C	C	C	G	C	C	C
Triticum aestivum ssp. aestivum	Hexaploid	Cultivar	KFSH	6	China	G	G	G	C	C	C	C	G	C	C	C
Triticum aestivum ssp. aestivum	Hexaploid	Cultivar	KXSH	6	China	G	G	G	C	C	C	C	G	C	C	C
Triticum aestivum ssp. aestivum	Hexaploid	Cultivar	NLD-C1	6	NEthiopiaerlands	G	G	G	C	C	C	C	G	C	C	C
Triticum aestivum ssp. aestivum	Hexaploid	Cultivar	NXWH	6	China	G	G	G	C	C	C	C	G	C	C	C
Triticum aestivum ssp. aestivum	Hexaploid	Cultivar	PYEQ	6	China	G	G	G	C	C	C	C	G	C	C	C
Triticum aestivum ssp. aestivum	Hexaploid	Cultivar	PI 593047	6	America	G	G	G	C	C	C	C	G	C	C	C
Triticum aestivum ssp. aestivum	Hexaploid	Cultivar	PI 9131	6	Uzbekistan	G	G	G	C	C	C	C	G	C	C	C
Triticum aestivum ssp. aestivum	Hexaploid	Cultivar	XYLH	6	China	G	G	G	C	C	C	C	G	C	C	C
Triticum aestivum ssp. aestivum	Hexaploid	Cultivar	YASY	6	China	G	G	G	C	C	C	C	G	C	C	C
Triticum aestivum ssp. aestivum	Hexaploid	Cultivar	YNSW	6	China	G	G	G	C	C	C	C	G	C	C	C
Triticum aestivum ssp. aestivum	Hexaploid	Cultivar	ZDSH	6	China	G	G	G	C	C	C	C	G	C	C	C
Triticum aestivum ssp. aestivum	Hexaploid	Cultivar	ZYJWLQ	6	China	G	G	G	C	C	C	C	G	C	C	C
Triticum aestivum ssp. compactum	Hexaploid	Club wheat	PI 572851	6	Pakistan	NA	G	G	C	C	C	C	G	C	C	C
Triticum aestivum ssp. compactum	Hexaploid	Club wheat	PI 470735	6	Turkey	G	G	G	C	C	C	C	G	C	C	C
Triticum aestivum ssp. compactum	Hexaploid	Club wheat	PI 341432	6	Turkey	G	G	G	C	C	C	C	G	C	C	C
Triticum aestivum ssp. compactum	Hexaploid	Club wheat	PI 60740	6	Egypt	G	G	G	C	C	C	C	G	C	C	C
Triticum aestivum ssp. compactum	Hexaploid	Club wheat	PI 366118	6	Egypt	G	G	G	C	C	C	C	G	C	C	C
Triticum aestivum ssp. sphaerococcum	Hexaploid	Indian dwarf wheat	PI 42013	6	India	G	G	G	C	C	C	C	G	C	C	C
Triticum aestivum ssp. sphaerococcum	Hexaploid	Indian dwarf wheat	PI 40942	6	Pakistan	G	G	G	C	C	C	C	G	C	C	C
Triticum aestivum ssp. sphaerococcum	Hexaploid	Indian dwarf wheat	PI 277164	6	Pakistan	G	NA	G	NA	C	C	C	G	C	C	C
Triticum aestivum ssp. sphaerococcum	Hexaploid	Indian dwarf wheat	PI 337997	6	India	G	G	G	C	C	C	C	G	C	C	C
Triticum aestivum ssp. sphaerococcum	Hexaploid	Indian dwarf wheat	PI 182118	6	Pakistan	G	G	G	C	C	C	C	NA	C	C	C
Triticum aestivum ssp. petropavlovskyi	Hexaploid	Xinjiang wheat	PI 585015	6	China	G	G	G	C	C	C	C	G	C	C	C
Triticum aestivum ssp. petropavlovskyi	Hexaploid	Xinjiang wheat	IG 45115	6	China	NA	G	G	C	C	C	C	G	C	C	C
Triticum aestivum ssp. petropavlovskyi	Hexaploid	Xinjiang wheat	TRI 9934	6	Soviet Union	G	G	G	C	C	C	NA	G	C	C	C
Triticum aestivum ssp. petropavlovskyi	Hexaploid	Xinjiang wheat	TRI 12908	6	NA	G	G	G	C	C	C	C	G	C	C	C
Triticum aestivum ssp. aestivum	Hexaploid	Elite variety	Aimengniu	3	China, Shandong	G	G	G	C	C	C	C	G	C	C	C
Triticum aestivum ssp. aestivum	Hexaploid	Elite variety	Aodesa3	3	Russia	G	G	G	C	C	C	C	G	C	C	C
Triticum aestivum ssp. aestivum	Hexaploid	Landrace	Baibiansui	3	China, Shandong	G	G	G	C	C	C	C	G	C	C	C
Triticum aestivum ssp. aestivum	Hexaploid	Landrace	Baidatou	3	China, Gansu	G	G	G	C	C	C	C	G	C	C	C
Triticum aestivum ssp. aestivum	Hexaploid	Landrace	Baihuamai	3	China, Guizhou	G	G	G	C	C	C	C	G	C	C	C
Triticum aestivum ssp. aestivum	Hexaploid	Landrace	Baimaizi	3	China, Sichuan	G	G	G	C	C	C	C	G	C	C	C
Triticum aestivum ssp. aestivum	Hexaploid	Landrace	Baimangmai	3	China, Guizhou	G	G	G	C	C	C	C	G	C	C	C
Triticum aestivum ssp. aestivum	Hexaploid	Landrace	BaipuLuoqing	3	China, Zhejiang	G	G	G	C	C	C	C	G	C	C	C
Triticum aestivum ssp. aestivum	Hexaploid	Landrace	Baiqimai	3	China, Gansu	G	G	G	C	C	C	C	G	C	C	C
Triticum aestivum ssp. aestivum	Hexaploid	Landrace	Baiqiumai	3	China, Hebei	G	G	G	C	C	C	C	G	C	C	C
Triticum aestivum ssp. aestivum	Hexaploid	Landrace	Baituzitou	3	China, Shandong	G	G	G	C	C	C	C	G	C	C	C
Triticum aestivum ssp. aestivum	Hexaploid	Landrace	Banjiemang	3	China, Jiangsu	G	G	G	C	C	C	C	G	C	C	C
Triticum aestivum ssp. aestivum	Hexaploid	Landrace	Bendihuanghuamai	3	China, Sichuan	G	G	G	C	C	C	C	G	C	C	C
Triticum aestivum ssp. aestivum	Hexaploid	Landrace	Chanbuzhi	3	China, Anhui	G	G	G	C	C	C	C	G	C	C	C
Triticum aestivum ssp. aestivum	Hexaploid	Landrace	Changmangshibiantou	3	China, Yunnan	G	G	G	C	C	C	C	G	C	C	C
Triticum aestivum ssp. aestivum	Hexaploid	Landrace	Dabaimai	3	China, Hebei	G	G	G	C	C	C	C	G	C	C	C
Triticum aestivum ssp. aestivum	Hexaploid	Landrace	Dachunbaisilengmai	3	China, Sichuan	G	G	G	C	C	C	C	G	C	C	C
Triticum aestivum ssp. aestivum	Hexaploid	Landrace	Dahuangpi	3	China, Anhui	G	G	G	C	C	C	C	G	C	C	C
Triticum aestivum ssp. aestivum	Hexaploid	Landrace	Daimanghongmai	3	China, Tianjin	G	G	G	C	C	C	C	G	C	C	C
Triticum aestivum ssp. aestivum	Hexaploid	Landrace	Dakoumai	3	China, Henan	G	G	G	C	C	C	C	G	C	C	C
Triticum aestivum ssp. aestivum	Hexaploid	Landrace	Dalibanmang	3	China, Shandong	G	G	G	C	C	C	C	G	C	C	C
Triticum aestivum ssp. aestivum	Hexaploid	Elite variety	EarlyPremium	3	USA	G	G	G	C	C	C	C	G	C	C	C
Triticum aestivum ssp. aestivum	Hexaploid	Elite variety	Funo	3	Italy	G	G	G	C	C	C	C	G	C	C	C
Triticum aestivum ssp. aestivum	Hexaploid	Landrace	Fuyanghong	3	China, Anhui	G	G	G	C	C	C	C	G	C	C	C
Triticum aestivum ssp. aestivum	Hexaploid	Landrace	Hanzhongbai	3	China, Shaanxi	G	G	G	C	C	C	C	G	C	C	C
Triticum aestivum ssp. aestivum	Hexaploid	Landrace	Hongheshangtou	3	China, Henan	G	G	G	C	C	C	C	G	C	C	C
Triticum aestivum ssp. aestivum	Hexaploid	Landrace	Honghuamai	3	China, Sichuan	G	G	G	C	C	C	C	G	C	C	C
Triticum aestivum ssp. aestivum	Hexaploid	Landrace	Hongjinmai	3	China, Gansu	G	G	G	C	C	C	C	G	C	C	C
Triticum aestivum ssp. aestivum	Hexaploid	Landrace	Honglaomai	3	China, Shaanxi	G	G	G	C	C	C	C	G	C	C	C
Triticum aestivum ssp. aestivum	Hexaploid	Landrace	Hongmai	3	China, Hebei	G	G	G	C	C	C	C	G	C	C	C
Triticum aestivum ssp. aestivum	Hexaploid	Landrace	Hongmangmai	3	China, Hebei	G	G	G	C	C	C	C	G	C	C	C
Triticum aestivum ssp. aestivum	Hexaploid	Landrace	Hongmangzi	3	China, Hubei	G	G	G	C	C	C	C	G	C	C	C
Triticum aestivum ssp. aestivum	Hexaploid	Landrace	Hongpidongmai	3	China, Shanxi	G	G	G	C	C	C	C	G	C	C	C
Triticum aestivum ssp. aestivum	Hexaploid	Landrace	Hongxumai	3	China, Shaanxi	G	G	G	C	C	C	C	G	C	C	C
Triticum aestivum ssp. aestivum	Hexaploid	Landrace	Huangguaxian	3	China, Shandong	G	G	G	C	C	C	C	G	C	C	C
Triticum aestivum ssp. aestivum	Hexaploid	Landrace	Huangshuibai	3	China, Zhejiang	G	G	G	C	C	C	C	G	C	C	C
Triticum aestivum ssp. aestivum	Hexaploid	Landrace	Huanxiangguo	3	China, Sichuan	G	G	G	C	C	C	C	G	C	C	C
Triticum aestivum ssp. aestivum	Hexaploid	Landrace	Huomai	3	China, Henan	G	G	G	C	C	C	C	G	C	C	C
Triticum aestivum ssp. aestivum	Hexaploid	Landrace	Jiahongmai	3	China, Shanxi	G	G	G	C	C	C	C	G	C	C	C
Triticum aestivum ssp. aestivum	Hexaploid	Landrace	Jiangdongmen	3	China, Jiangsu	G	G	G	C	C	C	C	G	C	C	C
Triticum aestivum ssp. aestivum	Hexaploid	Landrace	Jiangmai	3	China, Guizhou	G	G	G	C	C	C	C	G	C	C	C
Triticum aestivum ssp. aestivum	Hexaploid	Elite variety	Jinan17	3	China, Shandong	G	G	G	C	C	C	C	G	C	C	C
Triticum aestivum ssp. aestivum	Hexaploid	Elite variety	Laizhou953	3	China, Shandong	G	G	G	C	C	C	C	G	C	C	C
Triticum aestivum ssp. aestivum	Hexaploid	Landrace	Lanhuamai	3	China, Gansu	G	G	G	C	C	C	C	G	C	C	C
Triticum aestivum ssp. aestivum	Hexaploid	Landrace	Laolaixia	3	China, Shandong	G	G	G	C	C	C	C	G	C	C	C
Triticum aestivum ssp. aestivum	Hexaploid	Landrace	Laomai	3	China, Shaanxi	G	G	G	C	C	C	C	G	C	C	C
Triticum aestivum ssp. aestivum	Hexaploid	Landrace	Laoqimai	3	China, Shaanxi	G	G	G	C	C	C	C	G	C	C	C
Triticum aestivum ssp. aestivum	Hexaploid	Landrace	Laotutou	3	China, Ningxia	G	G	G	C	C	C	C	G	C	C	C
Triticum aestivum ssp. aestivum	Hexaploid	Landrace	Liuzhutou	3	China, Jiangsu	G	G	G	C	C	C	C	G	C	C	C
Triticum aestivum ssp. aestivum	Hexaploid	Landrace	Louguding	3	China, Shandong	G	G	G	C	C	C	C	G	C	C	C
Triticum aestivum ssp. aestivum	Hexaploid	Elite variety	Lovrin10	3	Romania	G	G	G	C	C	C	C	G	C	C	C
Triticum aestivum ssp. aestivum	Hexaploid	Landrace	Mazhamai	3	China, Shaanxi	G	G	G	C	C	C	C	G	C	C	C
Triticum aestivum ssp. aestivum	Hexaploid	Landrace	Motuoxiaomai	3	China, Xizang	G	G	G	C	C	C	C	G	C	C	C
Triticum aestivum ssp. aestivum	Hexaploid	Landrace	Niuzhijia	3	China, Shanxi	G	G	G	C	C	C	C	G	C	C	C
Triticum aestivum ssp. aestivum	Hexaploid	Elite variety	Nonglin10	3	Japan	G	G	G	C	C	C	C	G	C	C	C
Triticum aestivum ssp. aestivum	Hexaploid	Landrace	Panshiwumang	3	China, Jilin	G	G	G	C	C	C	C	G	C	C	C
Triticum aestivum ssp. aestivum	Hexaploid	Landrace	Paozimai	3	China, Jiangxi	G	G	G	C	C	C	C	G	C	C	C
Triticum aestivum ssp. aestivum	Hexaploid	Elite variety	Qianjiaomai	3	Unknown	G	G	G	C	C	C	C	G	C	C	C
Triticum aestivum ssp. aestivum	Hexaploid	Landrace	Sankecun	3	China, Hubei	G	G	G	C	C	C	C	G	C	C	C
Triticum aestivum ssp. aestivum	Hexaploid	Landrace	Sanyuehuang	3	China, Henan	G	G	G	C	C	C	C	G	C	C	C
Triticum aestivum ssp. aestivum	Hexaploid	Landrace	Shanxibaimai	3	China, Gansu	G	G	G	C	C	C	C	G	C	C	C
Triticum aestivum ssp. aestivum	Hexaploid	Elite variety	Shijiazhuang407	3	China, Hebei	G	G	G	C	C	C	C	G	C	C	C
Triticum aestivum ssp. aestivum	Hexaploid	Landrace	Shuilizhan	3	China, Jiangxi	G	G	G	C	C	C	C	G	C	C	C
Triticum aestivum ssp. aestivum	Hexaploid	Landrace	Suotiaohongmai	3	China, Shaanxi	G	G	G	C	C	C	C	G	C	C	C
Triticum aestivum ssp. aestivum	Hexaploid	Landrace	Tongjiabaxiaomai	3	China, Sichuan	G	G	G	C	C	C	C	G	C	C	C
Triticum aestivum ssp. aestivum	Hexaploid	Elite variety	Triumph	3	USA	G	G	G	C	C	C	C	G	C	C	C
Triticum aestivum ssp. aestivum	Hexaploid	Elite variety	VillaGlori	3	Italy	G	G	G	C	C	C	C	G	C	C	C
Triticum aestivum ssp. aestivum	Hexaploid	Landrace	Xianyangdasui	3	China, Shaanxi	G	G	G	C	C	C	C	G	C	C	C
Triticum aestivum ssp. aestivum	Hexaploid	Landrace	Xiaobaimang	3	China, Hebei	G	G	G	C	C	C	C	G	C	C	C
Triticum aestivum ssp. aestivum	Hexaploid	Landrace	Xiaofoshou	3	China, Henan	G	G	G	C	C	C	C	G	C	C	C
Triticum aestivum ssp. aestivum	Hexaploid	Landrace	Xiaokouhong	3	China, Liaoning	G	G	G	C	C	C	C	G	C	C	C
Triticum aestivum ssp. aestivum	Hexaploid	Elite variety	Xiaoyan6	3	China, Shaanxi	G	G	G	C	C	C	C	G	C	C	C
Triticum aestivum ssp. aestivum	Hexaploid	Elite variety	Xindong2	3	China, Xinjiang	G	G	G	C	C	C	C	G	C	C	C
Triticum aestivum ssp. aestivum	Hexaploid	Landrace	Xishanbiansui	3	China, Shandong	G	G	G	C	C	C	C	G	C	C	C
Triticum aestivum ssp. aestivum	Hexaploid	Elite variety	Youbaomai	3	China, Shandong	G	G	G	C	C	C	C	G	C	C	C
Triticum aestivum ssp. aestivum	Hexaploid	Landrace	Youmangbaifu	3	China, Jilin	G	G	G	C	C	C	C	G	C	C	C
Triticum aestivum ssp. aestivum	Hexaploid	Landrace	Youmangsaogudan	3	China, Henan	G	G	G	C	C	C	C	G	C	C	C
Triticum aestivum ssp. aestivum	Hexaploid	Landrace	Youzimai	3	China, Henan	G	G	G	C	C	C	C	G	C	C	C
Triticum aestivum ssp. aestivum	Hexaploid	Landrace	Yuqiumai	3	China, Guizhou	G	G	G	C	C	C	C	G	C	C	C
Triticum aestivum ssp. aestivum	Hexaploid	Landrace	Zaowutian	3	China, Jiangsu	G	G	G	C	C	C	C	G	C	C	C
Triticum aestivum ssp. aestivum	Hexaploid	Landrace	Zaoxiaomai	3	China, Zhejiang	G	G	G	C	C	C	C	G	C	C	C
Triticum aestivum ssp. aestivum	Hexaploid	Elite variety	Zhengyin4	3	Italy	G	G	G	C	C	C	C	G	C	C	C
Triticum aestivum ssp. aestivum	Hexaploid	Landrace	Zhugoumai	3	China, Yunnan	G	G	G	C	C	C	C	G	C	C	C
Triticum aestivum ssp. aestivum	Hexaploid	Landrace	Zhuoludongmai	3	China, Hebei	G	G	G	C	C	C	C	G	C	C	C
Triticum aestivum ssp. aestivum	Hexaploid	Landrace	Zhushimai	3	China, Yunnan	G	G	G	C	C	C	C	G	C	C	C
Triticum aestivum ssp. aestivum	Hexaploid	Landrace	Zijiehong	3	China, Shandong	G	G	G	C	C	C	C	G	C	C	C
Triticum aestivum ssp. aestivum	Hexaploid	Landrace	Zipi	3	China, Sichuan	G	G	G	C	C	C	C	G	C	C	C
Triticum aestivum ssp. aestivum	Hexaploid	Landrace	Honggoudou	3	China, Henan	G	G	G/A	C	C	C	C	G	C	C	C
Triticum aestivum ssp. aestivum	Hexaploid	Landrace	Dayuhua	3	China, Jiangsu	G	G	A	C	C	C	C	G	C	C	C
Triticum aestivum ssp. aestivum	Hexaploid	Landrace	Fumai	3	China, Henan	G	G	A	C	C	C	C	G	C	C	C
Triticum turgidum ssp. dicoccon	Tetraploid	Domesticated emmer	111926	4	India	NA	NA	NA	C	C	C	C	G	C	C	C
Triticum turgidum ssp. dicoccon	Tetraploid	Domesticated emmer	PI 94673	4	Armenia	NA	NA	NA	C	C	C	C	G	C	C	C
Triticum turgidum ssp. dicoccon	Tetraploid	Domesticated emmer	PI 276017	4	Spain, Asturias	NA	NA	NA	C	C	C	C	G	C	C	C
Triticum turgidum ssp. dicoccon	Tetraploid	Domesticated emmer	132232	4	Germany	NA	NA	NA	C	C	C	C	G	C	C	C
Triticum aestivum ssp. spelta	Hexaploid	Spelt	PI 520066	4	Mexico, Ciudad de México	NA	NA	NA	C	C	C	C	G	C	C	C
Triticum aestivum ssp. spelta	Hexaploid	Spelt	PI 168680	4	United States, Washington	NA	NA	NA	C	C	C	C	G	C	C	C
Triticum aestivum ssp. spelta	Hexaploid	Spelt	PI 221419	4	Serbia	NA	NA	NA	C	C	C	C	G	C	C	C
Triticum aestivum ssp. spelta	Hexaploid	Spelt	PI 348773	4	Spain, Asturias	NA	NA	NA	C	C	C	C	G	C	C	C
Triticum aestivum ssp. spelta	Hexaploid	Spelt	PI 361768	4	Denmark	NA	NA	NA	C	C	C	C	G	C	C	C
Triticum aestivum ssp. spelta	Hexaploid	Spelt	PI 361813	4	Denmark	NA	NA	NA	C	C	C	C	G	C	C	C
Triticum aestivum ssp. spelta	Hexaploid	Spelt	PI 348360	4	Belgium, Région wallonne	NA	NA	NA	C	C	C	C	G	C	C	C
Triticum aestivum ssp. spelta	Hexaploid	Spelt	PI 355704	4	United Kingdom, England	NA	NA	NA	C	C	C	C	G	C	C	C
Triticum aestivum ssp. spelta	Hexaploid	Spelt	PI 330558	4	United Kingdom, England	NA	NA	NA	C	C	C	C	G	C	C	C
Triticum aestivum ssp. spelta	Hexaploid	Spelt	PI 615267	4	Belgium, Région wallonne	NA	NA	NA	C	C	C	C	G	C	C	C
Triticum aestivum ssp. spelta	Hexaploid	Spelt	PI 225271	4	Iran	NA	NA	NA	C	C	C	C	G	C	C	C
Triticum aestivum ssp. macha	Hexaploid	Macha	PI 542466	4	United States, Oregon	NA	NA	NA	C	C	C	C	G	C	C	C
Triticum aestivum ssp. macha	Hexaploid	Macha	PI 428146	4	Sweden, Uppsala län	NA	NA	NA	C	C	C	C	G	C	C	C
Triticum aestivum ssp. macha	Hexaploid	Macha	PI 572912	4	Georgia, Imereti	NA	NA	NA	C	C	C	C	G	C	C	C
Triticum aestivum ssp. macha	Hexaploid	Macha	PI 352466	4	Former Soviet Union	NA	NA	NA	C	C	C	C	G	C	C	C
Triticum aestivum ssp. aestivum	Hexaploid	Landrace and cultivar	780 accessions (see He et al., 2019)	4	See He et al., 2019	NA	NA	NA	C	C	C	C	G	C	C	C
Triticum aestivum ssp. compactum	Hexaploid	Club wheat	PI 372151	4	Armenia	NA	NA	NA	C	C	C	C	G	C	C	C
Triticum aestivum ssp. compactum	Hexaploid	Club wheat	132253	4	Georgia	NA	NA	NA	C	C	C	C	G	C	C	C
Triticum aestivum ssp. compactum	Hexaploid	Club wheat	132255	4	Cyprus	NA	NA	NA	C	C	C	C	G	C	C	C
Triticum aestivum ssp. compactum	Hexaploid	Club wheat	132256	4	Former Soviet Union	NA	NA	NA	C	C	C	C	G	C	C	C
Triticum aestivum ssp. sphaerococcum	Hexaploid	Indian dwarf wheat	101198	4	India	NA	NA	NA	C	C	C	C	G	C	C	C
Triticum aestivum ssp. sphaerococcum	Hexaploid	Indian dwarf wheat	PI 190982	4	Belgium	NA	NA	NA	C	C	C	C	G	C	C	C
Triticum aestivum ssp. sphaerococcum	Hexaploid	Indian dwarf wheat	PI 330556	4	United Kingdom, England	NA	NA	NA	C	C	C	C	G	C	C	C
Triticum aestivum ssp. aestivum	Hexaploid	Cultivar	PI 565404	4	Tajikistan	NA	NA	NA	C	C/A	C	C	G	C	C	C
Triticum aestivum ssp. aestivum	Hexaploid	Cultivar	PI 564351	4	Bulgaria, Dobrich	NA	NA	NA	C	A	C	C	G	C	C	C
Triticum aestivum ssp. spelta	Hexaploid	Spelt	PI 348303	4	Belgium, Région wallonne	NA	NA	NA	C	C	C/G	C	G	C	C	C
Triticum aestivum ssp. spelta	Hexaploid	Spelt	PI 348141	4	Germany, Baden-Wurttemberg	NA	NA	NA	C	C	C/G	C	G	C	C	C
Triticum aestivum ssp. spelta	Hexaploid	Spelt	PI 15865	4	United States, Washington	NA	NA	NA	C	C	C/G	C	G	C	C	C
Triticum aestivum ssp. aestivum	Hexaploid	Landrace	Chinese Spring (Reference)	5	China, Sichuan	G	G	G	C	C	C	C	G	C	C	C
