# Supplementary material
Source: Research Square preprint supplement (doi:10.21203/rs.3.rs-9315249/v1)
Supplement: Supplementary file 3 [file 36511eb881934c190c299a46.xlsx]

## Sheet: Sheet1
Supplementary Data 10. Accessions used for TraesCS2B02G073600 CDS haplotype analysis. The type of mutation (synonymous or missence) for each polymorphic position is indicated in row 2. Bases identical to those in the CS reference sequence are in green cells and variant bases in cells with other colors.Data source are coded in column F are coded as follows: 3. Bread wheat RNA-seq62; 4. Exome seque…
							missense	missense	synonymous	missense	missense	synonymous	synonymous	synonymous	missense	synonymous	synonymous	synonymous	synonymous	synonymous	synonymous	synonymous	missense	synonymous	synonymous	synonymous	synonymous
Species	Ploidy	Common name	Accession	Threshability	Data source	Origin	40 bp	43 bp	216 bp	524-525 bp	952 bp	1407 bp	1422 bp	1647 bp	1803 bp	2043 bp	2142 bp	2145 bp	2226 bp	2238 bp	2244 bp	2247 bp	2258 bp	2259 bp	2262 bp	2265 bp	2301 bp
Triticum turgidum ssp. dicoccoides	Tetraploid	Wild emmer	PI 428138	Non-free-threshing	6	Lebanon	T	C	NA	NA	C	NA	NA	C	T	G	G	C	G	G	A	G	G	C	C	T	G
Triticum turgidum ssp. dicoccoides	Tetraploid	Wild emmer	PI 487254	Non-free-threshing	6	Syria	NA	NA	G	GC	C	NA	NA	NA	T	G	G	C	G	G	A	G	G	C	C	T	G
Triticum turgidum ssp. dicoccoides	Tetraploid	Wild emmer	TRI 11505	Non-free-threshing	6	Lebanon	NA	NA	G	GC	C	A	G	C	T	G	G	C	G	G	A	G	G	C	C	T	G
Triticum turgidum ssp. dicoccoides	Tetraploid	Wild emmer	PI 466959	Non-free-threshing	6	Israel	T	C	G	GC	C	A	G	C	T	G	G	C	G	G	A	G	G	C	C	T	G
Triticum turgidum ssp. dicoccoides	Tetraploid	Wild emmer	PI 487260	Non-free-threshing	6	Syria	T	NA	C	GC	C	A	G	C	T	NA	NA	NA	G	G	A	G	G	C	C	T	NA
Triticum turgidum ssp. dicoccon	Tetraploid	Domesticated emmer	PI 532306	Non-free-threshing	6	Ethiopia	NA	NA	C	NA	C	NA	NA	NA	T	NA	G	C	G	G	A	G	G	C	C	T	G
Triticum turgidum ssp. dicoccon	Tetraploid	Domesticated emmer	PI 197488	Non-free-threshing	6	Ethiopia	NA	NA	C	GC	C	A	G	NA	T	G	G	C	G	G	A	G	G	C	C	T	NA
Triticum turgidum ssp. dicoccon	Tetraploid	Domesticated emmer	PI 197484	Non-free-threshing	6	Ethiopia	NA	NA	C	NA	C	A	G	NA	T	NA	NA	NA	G	G	A	G	G	C	C	T	G
Triticum turgidum ssp. dicoccon	Tetraploid	Domesticated emmer	CItr 7966	Non-free-threshing	6	Ethiopia	NA	NA	C	GC	C	A	G	C	T	G	G	C	G	G	A	G	G	C	C	T	G
Triticum turgidum ssp. dicoccon	Tetraploid	Domesticated emmer	PI 479968	Non-free-threshing	6	Ethiopia	NA	NA	C	GC	C	NA	NA	C	T	NA	G	C	G	G	A	G	G	C	C	T	G
Triticum turgidum ssp. dicoccon	Tetraploid	Domesticated emmer	PI 94656	Non-free-threshing	6	Serbia	NA	NA	C	GC	C	NA	NA	C	T	G	G	C	G	G	A	G	G	C	C	T	G
Triticum turgidum ssp. dicoccon	Tetraploid	Domesticated emmer	PI 480465	Non-free-threshing	6	Ethiopia	NA	NA	C	NA	C	A	G	C	T	G	G	C	G	G	A	G	G	C	C	T	G
Triticum turgidum ssp. dicoccon	Tetraploid	Domesticated emmer	PI 58788	Non-free-threshing	6	Ethiopia	NA	NA	C	NA	C	A	G	C	T	G	G	C	G	G	A	G	G	C	C	T	G
Triticum turgidum ssp. dicoccon	Tetraploid	Domesticated emmer	CItr 14824	Non-free-threshing	6	Ethiopia	T	C	C	NA	C	A	G	NA	T	G	G	C	G	G	A	G	G	C	C	T	G
Triticum turgidum ssp. dicoccon	Tetraploid	Domesticated emmer	CItr 14916	Non-free-threshing	6	Ethiopia	T	C	C	NA	C	A	G	C	T	G	G	C	G	G	A	G	G	C	C	T	G
Triticum turgidum ssp. dicoccoides	Tetraploid	Wild emmer	PI 470991	Non-free-threshing	6	Israel	NA	NA	C	GC	C	G	G	C	T	NA	G	C	G	G	A	G	G	C	C	T	G
Triticum turgidum ssp. dicoccoides	Tetraploid	Wild emmer	PI 471012	Non-free-threshing	6	Israel	T	C	C	NA	C	G	T/G	NA	T	NA	NA	NA	G	G	A	G	G	C	C	T	G
Triticum turgidum ssp. dicoccoides	Tetraploid	Wild emmer	PI 471062	Non-free-threshing	6	Israel	T	C	C	GC	C	G	G	NA	T	NA	G	C	G	G	A	G	G	C	C	T	G
Triticum turgidum ssp. dicoccoides	Tetraploid	Wild emmer	PI 470998	Non-free-threshing	6	Israel	T	C	C	GC	C	G	G	C	T	G	G	C	G	G	A	G	G	C	C	T	G
Triticum turgidum ssp. dicoccon	Tetraploid	Domesticated emmer	CItr 3686	Non-free-threshing	6	America	T	T	C	NA	C	A	G	NA	T	NA	NA	NA	G	G	A	G	G	C	C	T	G
Triticum aestivum ssp. spelta	Hexaploid	Spelt	PI 347913	Non-free-threshing	6	Switzerland	NA	NA	C	GC	C	A	G	NA	T	NA	NA	NA	G	G	A	G	G	C	C	T	G
Triticum aestivum ssp. spelta	Hexaploid	Spelt	PI 168680	Non-free-threshing	6	America	NA	NA	C	GC	C	A	G	C	T	NA	NA	NA	G	G	A	G	G	C	C	T	NA
Triticum aestivum ssp. spelta	Hexaploid	Spelt	PI 272573	Non-free-threshing	6	Hungary	NA	NA	C	NA	C	NA	NA	C	T	NA	G	C	G	G	A	G	G	C	C	T	G
Triticum aestivum ssp. spelta	Hexaploid	Spelt	PI 591898	Non-free-threshing	6	Switzerland	NA	T	C	NA	C	A	G	NA	T	NA	NA	NA	G	G	A	G	G	C	C	T	G
Triticum aestivum ssp. spelta	Hexaploid	Spelt	PI 348349	Non-free-threshing	6	Belgium	NA	T	C	GC	C	A	G	NA	T	NA	G	C	G	G	A	G	G	C	C	T	G
Triticum aestivum ssp. spelta	Hexaploid	Spelt	PI 348168	Non-free-threshing	6	Germany	T	NA	C	NA	C	A	G	C	T	NA	G	C	G	G	A	G	G	C	C	T	G
Triticum aestivum ssp. spelta	Hexaploid	Spelt	PI 355592	Non-free-threshing	6	Switzerland	T	T	C	GC	C	A	G	T/C	T	NA	NA	NA	G	G	A	G	G	C	C	T	G
Triticum aestivum ssp. spelta	Hexaploid	Spelt	PI 306553	Non-free-threshing	6	Romania	T	T	C	GC	C	A	G	C	T	G	G	C	G	G	A	G	G	C	C	T	G
Triticum aestivum ssp. spelta	Hexaploid	Spelt	PI 348303	Non-free-threshing	6	Belgium	T	T	C	GC	C	A	G	C	T	G	G	C	G	G	A	G	G	C	C	T	G
Triticum aestivum ssp. spelta	Hexaploid	Spelt	PI 306554	Non-free-threshing	6	Romania	T	T	C	GC	C	A	G	NA	T	NA	NA	NA	G	G	A	G	G	C	C	T	G
Triticum turgidum ssp. carthlicum	Tetraploid	Persian wheat	PI 272521	Free-threshing	6	Hungary	T	T	C	NA	NA	A	G	C	T	G	NA	NA	G	G	A	G	G	C	C	T	G
Triticum turgidum ssp. carthlicum	Tetraploid	Persian wheat	PI 94751	Free-threshing	6	Georgia	T	NA	C	GC	NA	NA	NA	C	T	G	NA	NA	G	G	A	G	G	C	C	T	G
Triticum turgidum ssp. carthlicum	Tetraploid	Persian wheat	PI 470731	Free-threshing	6	Turkey	T	T	C	NA	C	A	G	NA	T	G	G	C	G	G	A	G	G	C	C	T	G
Triticum turgidum ssp. carthlicum	Tetraploid	Persian wheat	PI 532486	Free-threshing	6	Turkey	NA	NA	C	NA	C	A	G	C	T	NA	G	C	G	G	A	G	G	C	C	T	G
Triticum aestivum ssp. aestivum	Hexaploid	Landrace	PI 80741	Free-threshing	6	Afghanistan	T	T	C	GC	C	A	G	C	T	G	G	C	G	G	A	G	G	C	C	T	G
Triticum aestivum ssp. aestivum	Hexaploid	Landrace	PI 208895	Free-threshing	6	Iraq	T	T	C	GC	C	A	G	C	T	G	G	C	G	G	A	G	G	C	C	T	G
Triticum aestivum ssp. aestivum	Hexaploid	Landrace	PI 208900	Free-threshing	6	Iraq	T	T	C	GC	C	A	G	C	T	G	G	C	G	G	A	G	G	C	C	T	G
Triticum aestivum ssp. aestivum	Hexaploid	Landrace	PI 278547	Free-threshing	6	Syria	T	T	C	GC	C	A	G	C	T	G	G	C	G	G	A	G	G	C	C	T	G
Triticum aestivum ssp. aestivum	Hexaploid	Landrace	PI 166346	Free-threshing	6	Turkey	T	T	C	GC	C	A	G	C	T	G	G	C	G	G	A	G	G	C	C	T	G
Triticum turgidum ssp. dicoccoides	Tetraploid	Wild emmer	PI 428016	Non-free-threshing	6	Iran	C	T	C	GC	C	A	G	NA	T	G	G	C	G	G	A	G	G	C	C	T	G
Triticum turgidum ssp. dicoccoides	Tetraploid	Wild emmer	PI 466987	Non-free-threshing	6	Israel	NA	NA	C	NA	NA	NA	NA	T	T	NA	G	C	G	G	A	G	G	C	C	T	NA
Triticum turgidum ssp. dicoccoides	Tetraploid	Wild emmer	PI 428127	Non-free-threshing	6	Lebanon	T	C	NA	NA	C	A	G	C	T	G	G	C	NA	NA	NA	NA	G	NA	G	NA	G
Triticum turgidum ssp. dicoccoides	Tetraploid	Wild emmer	PI 538702	Non-free-threshing	6	Lebanon	T	C	G	NA	C	A	G	NA	T	NA	NA	NA	NA	NA	NA	NA	NA	NA	G	NA	NA
Triticum turgidum ssp. dicoccon	Tetraploid	Domesticated emmer	PI 362696	Non-free-threshing	6	Montenegro	NA	NA	C	GC	C	NA	NA	C	T	NA	G	C	G	G	NA	NA	NA	NA	G	NA	NA
Triticum turgidum ssp. dicoccon	Tetraploid	Domesticated emmer	PI 254190	Non-free-threshing	6	Russia	NA	NA	C	GC	C	A	G	NA	T	G	G	C	G	G	NA	NA	G	NA	G	NA	G
Triticum turgidum ssp. dicoccon	Tetraploid	Domesticated emmer	PI 532305	Non-free-threshing	6	Oman	NA	NA	C	GC	C	A	G	C	T	NA	G	C	NA	NA	NA	NA	G	NA	G	NA	G
Triticum turgidum ssp. dicoccon	Tetraploid	Domesticated emmer	PI 479958	Non-free-threshing	6	Ethiopia	T	C	C	GC	C	A	G	C	T	G	G	C	NA	NA	NA	NA	NA	NA	G	NA	NA
Triticum turgidum ssp. dicoccon	Tetraploid	Domesticated emmer	PI 197492	Non-free-threshing	6	Ethiopia	T	C	C	GC	C	A	G	C	T	G	G	C	NA	NA	NA	NA	NA	NA	G	NA	NA
Triticum turgidum ssp. dicoccon	Tetraploid	Domesticated emmer	PI 534275	Non-free-threshing	6	Ethiopia	T	C	C	GC	C	NA	NA	C	T	NA	NA	NA	NA	NA	NA	NA	G	NA	G	NA	G
Triticum turgidum ssp. carthlicum	Tetraploid	Persian wheat	PI 585017	Free-threshing	6	Georgia	T	NA	C	NA	C	NA	NA	NA	T	G	NA	NA	NA	NA	NA	NA	G	NA	G	NA	NA
Triticum turgidum ssp. carthlicum	Tetraploid	Persian wheat	PI 94752	Free-threshing	6	Georgia	NA	NA	C	GC	C	A	G	C	T	G	G	C	G	G	A	NA	NA	NA	G	NA	NA
Triticum turgidum ssp. carthlicum	Tetraploid	Persian wheat	PI 94748	Free-threshing	6	Georgia	NA	NA	C	GC	C	A	G	NA	T	G	G	C	NA	NA	NA	NA	G	NA	G	NA	G
Triticum turgidum ssp. dicoccoides	Tetraploid	Wild emmer	PI 428107	Non-free-threshing	6	Israel	T	C	C	GC	C	G	NA	C	T	G	G	C	NA	NA	NA	NA	NA	NA	G	NA	NA
Triticum turgidum ssp. dicoccoides	Tetraploid	Wild emmer	PI 466986	Non-free-threshing	6	Israel	NA	NA	C	NA	C	G	G	NA	T	NA	NA	NA	NA	NA	NA	NA	G	NA	G	NA	G
Triticum turgidum ssp. dicoccon	Tetraploid	Domesticated emmer	PI 355484	Non-free-threshing	6	Spain	NA	T	C	GC	C	A	G	NA	T	G	G	C	NA	NA	NA	NA	G	NA	G	NA	NA
Triticum aestivum ssp. spelta	Hexaploid	Spelt	PI 347921	Non-free-threshing	6	Switzerland	NA	T	C	GC	C	A	G	NA	T	G	G	C	NA	NA	NA	NA	NA	NA	G	NA	NA
Triticum aestivum ssp. spelta	Hexaploid	Spelt	PI 615249	Non-free-threshing	6	Belgium	NA	T	C	GC	C	NA	NA	T/C	T	G	G	C	C	C	G	C	G	NA	G	NA	G
Triticum turgidum ssp. dicoccoides	Tetraploid	Wild emmer	PI 428041	Non-free-threshing	6	Turkey	NA	NA	C	NA	NA	G	T	T	T	C	A	T	C	C	G	C	A	G	G	G	C
Triticum turgidum ssp. dicoccoides	Tetraploid	Wild emmer	PI 428029	Non-free-threshing	6	Turkey	NA	NA	C	NA	T	G	NA	T	T	C	A	T	C	C	G	C	A	G	G	G	C
Triticum turgidum ssp. dicoccoides	Tetraploid	Wild emmer	PI 428098	Non-free-threshing	6	Israel	NA	NA	C	NA	T	G	T	T	T	C	A	T	C	C	G	C	A	G	G	G	C
Triticum turgidum ssp. dicoccoides	Tetraploid	Wild emmer	PI 538630	Non-free-threshing	6	Turkey	NA	NA	C	GC	T	G	T	T	T	C	A	T	C	C	G	C	A	G	G	G	C
Triticum turgidum ssp. dicoccoides	Tetraploid	Wild emmer	PI 428071	Non-free-threshing	6	Turkey	C	T	C	GC	C/T	G	T	T	T	C	A	T	C	C	G	C	A	G	G	G	C
Triticum turgidum ssp. dicoccoides	Tetraploid	Wild emmer	PI 428020	Non-free-threshing	6	Turkey	C	T	C	NA	NA	G	T	T	T	C	A	T	C	C	G	C	A	G	G	G	C
Triticum aestivum ssp. vavilovii	Hexaploid	Vavilovii	TRI 4630	Non-free-threshing	6	China	C	T	C	NA	T	G	T	T	T	C	A	T	C	C	G	C	A	G	G	NA	NA
Triticum aestivum ssp. vavilovii	Hexaploid	Vavilovii	KU-3848	Non-free-threshing	6	Turkey	C	T	C	GC	T	G	T	T	T	C	A	T	C	C	G	C	A	G	G	G	C
Triticum aestivum ssp. vavilovii	Hexaploid	Vavilovii	TRI 11556	Non-free-threshing	6	Soviet Union	C	T	C	GC	T	G	T	T	T	C	A	T	C	C	G	C	A	G	G	G	C
Triticum turgidum ssp. carthlicum	Tetraploid	Persian wheat	PI 470733	Free-threshing	6	Turkey	C	T	C	GC	T	G	T	T	T	C	A	T	C	C	G	C	A	G	G	G	C
Triticum turgidum ssp. turgidum	Tetraploid	Rivet wheat	PI 341300	Free-threshing	6	Turkey	C	T	C	GC	C/T	NA	NA	T	T	C	A	T	C	C	G	C	A	G	G	G	C
Triticum aestivum ssp. aestivum	Hexaploid	Landrace	PI 366569	Free-threshing	6	Afghanistan	C	T	C	GC	T	G	T	T	T	C	A	T	C	C	G	C	A	G	G	G	C
Triticum aestivum ssp. aestivum	Hexaploid	Landrace	CItr 9358	Free-threshing	6	Finland	C	T	C	GC	T	G	T	T	T	C	A	T	C	C	G	C	A	G	G	G	C
Triticum aestivum ssp. aestivum	Hexaploid	Landrace	PI 627954	Free-threshing	6	Iran	C	T	C	GC	T	G	T	T	T	C	A	T	C	C	G	C	A	G	G	G	C
Triticum aestivum ssp. aestivum	Hexaploid	Landrace	PI 628129	Free-threshing	6	Iran	C	T	C	GC	T	G	T	T	T	C	A	T	C	C	G	C	A	G	G	G	C
Triticum aestivum ssp. aestivum	Hexaploid	Landrace	KSBP	Free-threshing	6	China	C	T	C	GC	T	G	T	T	T	C	A	T	C	C	G	C	A	G	G	G	C
Triticum turgidum ssp. dicoccoides	Tetraploid	Wild emmer	PI 466980	Non-free-threshing	6	Israel	T	T	C	GC	C	G	T	T	T	C	A	T	C	C	G	C	G	G	G	G	C
Triticum aestivum ssp. vavilovii	Hexaploid	Vavilovii	TRI 9416	Non-free-threshing	6	Soviet Union	NA	NA	C	NA	NA	G	T	T	T	C	A	T	C	C	G	C	G	G	G	G	G/C
Triticum turgidum ssp. dicoccoides	Tetraploid	Wild emmer	PI 466943	Non-free-threshing	6	Syria	NA	T	C	NA	T	G	T	T	T	C	A	T	C	C	G	C	G	G	G	G	G
Triticum turgidum ssp. dicoccoides	Tetraploid	Wild emmer	PI 466934	Non-free-threshing	6	Syria	T	T	C	NA	T	G	T	T	T	C	A	T	C	C	G	C	G	G	G	G	G
Triticum turgidum ssp. dicoccoides	Tetraploid	Wild emmer	PI 466933	Non-free-threshing	6	Syria	T	NA	C	GC	T	G	T	T	T	C	A	T	C	C	G	C	G	G	G	G	G
Triticum turgidum ssp. dicoccoides	Tetraploid	Wild emmer	PI 466941	Non-free-threshing	6	Syria	NA	NA	C	GC	NA	G	T	T	T	C	A	T	C	C	G	C	G	G	G	G	G
Triticum turgidum ssp. dicoccoides	Tetraploid	Wild emmer	PI 466970	Non-free-threshing	6	Israel	NA	T	C	NA	NA	NA	NA	T	T	C	A	T	C	C	G	C	G	G	G	G	NA
Triticum turgidum ssp. dicoccoides	Tetraploid	Wild emmer	PI 428082	Non-free-threshing	6	Turkey	C	T	C	GC	C	G	T	T	T	C	A	T	C	C	G	C	G	G	G	G	G
Triticum turgidum ssp. dicoccon	Tetraploid	Domesticated emmer	PI 254192	Non-free-threshing	6	Serbia	C	T	C	GC	C	G	T	T	T	C	A	T	C	C	G	C	G	G	G	G	G
Triticum turgidum ssp. dicoccon	Tetraploid	Domesticated emmer	PI 197481	Non-free-threshing	6	Ethiopia	C	T	C	GC	C	G	T	T	T	C	A	T	C	C	G	C	G	G	G	G	G
Triticum turgidum ssp. dicoccon	Tetraploid	Domesticated emmer	PI 196905	Non-free-threshing	6	Ethiopia	C	T	C	NA	C	G	T	T	T	C	A	T	C	C	G	C	G	G	G	G	G
Triticum turgidum ssp. dicoccon	Tetraploid	Domesticated emmer	PI 266842	Non-free-threshing	6	United Kingdom	C	T	C	NA	C	G	T	T	T	C	A	T	C	C	G	C	G	G	G	G	G
Triticum turgidum ssp. dicoccon	Tetraploid	Domesticated emmer	PI 626391	Non-free-threshing	6	Iran	C	T	C	NA	C	G	T	T	T	C	A	T	C	C	G	C	G	G	G	G	G
Triticum turgidum ssp. dicoccon	Tetraploid	Domesticated emmer	PI 94668	Non-free-threshing	6	Russia	C	T	C	GC	C	G	T	T	T	C	A	T	C	C	G	C	G	G	G	G	G
Triticum turgidum ssp. dicoccon	Tetraploid	Domesticated emmer	PI 349045	Non-free-threshing	6	Russia	C	T	C	GC	C	G	T	T	T	C	A	T	C	C	G	C	G	G	G	G	G
Triticum turgidum ssp. dicoccon	Tetraploid	Domesticated emmer	PI 254191	Non-free-threshing	6	Russia	C	T	C	GC	C	G	T	T	T	C	A	T	C	C	G	C	G	G	G	G	G
Triticum turgidum ssp. dicoccon	Tetraploid	Domesticated emmer	PI 624908	Non-free-threshing	6	Iran	C	T	C	GC	C	G	T	T	T	NA	A	T	C	C	G	C	G	G	G	G	G
Triticum turgidum ssp. dicoccon	Tetraploid	Domesticated emmer	PI 499973	Non-free-threshing	6	Armenia	C	T	C	NA	C	G	T	T	T	C	A	T	C	C	G	C	G	G	G	G	G
Triticum turgidum ssp. dicoccon	Tetraploid	Domesticated emmer	PI 624904	Non-free-threshing	6	Iran	C	T	C	GC	C	G	T	T	T	NA	A	T	C	C	G	C	G	G	G	G	G
Triticum turgidum ssp. ispahanicum	Tetraploid	Ispahanicum (Ispahan emmer)	KU-4580	Non-free-threshing	6	Iran	C	T	C	NA	C	G	T	T	T	C	A	T	C	C	G	C	G	G	G	G	G
Triticum turgidum ssp. ispahanicum	Tetraploid	Ispahanicum (Ispahan emmer)	PI 294477	Non-free-threshing	6	France	C	T	NA	NA	C	G	T	NA	T	NA	A	T	C	C	G	C	G	G	G	G	G
Triticum turgidum ssp. ispahanicum	Tetraploid	Ispahanicum (Ispahan emmer)	PI 352493	Non-free-threshing	6	Iran	C	T	C	NA	C	G	T	T	T	C	A	T	C	C	G	C	G	G	G	G	G
Triticum turgidum ssp. ispahanicum	Tetraploid	Ispahanicum (Ispahan emmer)	PI 294478	Non-free-threshing	6	France	C	T	C	GC	C	G	T	T	T	NA	A	T	C	C	G	C	G	G	G	G	G
Triticum turgidum ssp. ispahanicum	Tetraploid	Ispahanicum (Ispahan emmer)	PI 330548	Non-free-threshing	6	Iran	C	T	C	NA	C	G	T	T	T	C	A	T	C	C	G	C	G	G	G	G	G
Triticum turgidum ssp. ispahanicum	Tetraploid	Ispahanicum (Ispahan emmer)	KU-145	Non-free-threshing	6	Iran	C	T	C	GC	C	G	T	T	T	C	A	T	C	C	G	C	G	G	G	G	G
Triticum turgidum ssp. ispahanicum	Tetraploid	Ispahanicum (Ispahan emmer)	TRI 6177	Non-free-threshing	6	Iran	C	T	C	NA	C	G	T	T	T	C	A	T	C	C	G	C	G	G	G	G	G
Triticum turgidum ssp. karamyschevii	Tetraploid	Georgian wheat (Colchic emmer)	TRI 4568	Non-free-threshing	6	Georgia	C	T	C	NA	C	G	T	T	T	C	A	T	C	C	G	C	NA	NA	G	NA	NA
Triticum turgidum ssp. karamyschevii	Tetraploid	Georgian wheat (Colchic emmer)	TRI 11946	Non-free-threshing	6	Georgia	C	T	C	NA	C	G	T	T	T	C	A	T	C	C	G	C	G	G	G	G	G
Triticum turgidum ssp. karamyschevii	Tetraploid	Georgian wheat (Colchic emmer)	TRI 12750	Non-free-threshing	6	Georgia	C	T	C	GC	C	G	T	T	T	C	A	T	C	C	G	C	G	G	G	G	G
Triticum aestivum ssp. macha	Hexaploid	Macha	T1240001	Non-free-threshing	6	NA	C	NA	NA	NA	C	NA	NA	T	T	C/G	NA	NA	C	C	NA	C	G	G	G	NA	NA
Triticum aestivum ssp. macha	Hexaploid	Macha	PI 272555	Non-free-threshing	6	Hungary	C	T	C	GC	C	G	T	T	T	C	A	T	C	C	G	C	G	G	G	G	G
Triticum aestivum ssp. macha	Hexaploid	Macha	PI 572910	Non-free-threshing	6	Georgia	NA	NA	C	GC	C	G	T	T	T	C	A	T	C	C	G	C	G	G	G	G	G
Triticum aestivum ssp. macha	Hexaploid	Macha	PI 572909	Non-free-threshing	6	Georgia	C	T	C	GC	C	G	T	T	T	C	A	T	C	C	G	C	G	G	G	G	G
Triticum aestivum ssp. macha	Hexaploid	Macha	TRI 13602	Non-free-threshing	6	Georgia	C	T	C	GC	C	NA	T	T	T	C	A	T	C	C	G	C	G	G	G	G	G
Triticum aestivum ssp. tibeticum	Hexaploid	Tibetan semi wild	XM1232	Partially free-threshing	6	China	C	T	C	NA	C	G	T	T	T	C	A	T	C	C	G	C	G	G	G	G	G
Triticum aestivum ssp. tibeticum	Hexaploid	Tibetan semi wild	XM1247	Partially free-threshing	6	China	C	T	C	NA	C	G	T	T	T	NA	A	T	C	C	G	C	G	G	G	G	G
Triticum aestivum ssp. tibeticum	Hexaploid	Tibetan semi wild	XM1222	Partially free-threshing	6	China	C	T	C	GC	C	G	T	T	T	C	A	T	C	C	G	C	G	G	G	G	G
Triticum aestivum ssp. tibeticum	Hexaploid	Tibetan semi wild	XM1378	Partially free-threshing	6	China	C	T	C	GC	NA	G	T	T	T	C	A	T	C	C	G	C	G	G	G	G	G
Triticum aestivum ssp. tibeticum	Hexaploid	Tibetan semi wild	XM1379	Partially free-threshing	6	China	C	T	C	GC	C	G	T	T	T	C	A	T	C	C	G	C	G	G	G	G	G
Triticum aestivum ssp. yunnanese	Hexaploid	Yunan wheat	XM0932	Non-free-threshing	6	China	C	T	C	GC	C	G	T	T	T	C	A	T	C	C	G	C	G	G	G	G	G
Triticum aestivum ssp. yunnanese	Hexaploid	Yunan wheat	XM0920	Non-free-threshing	6	China	C	T	C	GC	C	G	T	T	T	C	A	T	C	C	G	C	G	G	G	G	G
Triticum aestivum ssp. spelta	Hexaploid	Spelt	PI 348526	Non-free-threshing	6	Spain	NA	NA	C	GC	C	G	T	T	T	C	A	T	C	C	G	C	G	G	G	G	G
Triticum aestivum ssp. vavilovii	Hexaploid	Vavilovii	TRI 7315	Non-free-threshing	6	Armenia	NA	NA	C	GC	C	G	T	T	T	C	NA	NA	NA	NA	NA	NA	NA	NA	G	NA	G
Triticum turgidum ssp. carthlicum	Tetraploid	Persian wheat	PI 168672	Free-threshing	6	China	C	T	NA	NA	NA	G	T	T	T	C	A	T	C	C	G	C	G	G	G	G	G
Triticum turgidum ssp. polonicum	Tetraploid	Polish wheat	PI 384344	Free-threshing	6	Ethiopia	C	T	C	GC	C	G	T	T	T	C	A	T	C	C	G	C	G	G	G	G	G
Triticum turgidum ssp. polonicum	Tetraploid	Polish wheat	PI 384342	Free-threshing	6	Ethiopia	C	T	C	GC	C	G	T	T	T	C	A	T	C	C	G	C	G	G	G	G	G
Triticum aestivum ssp. aestivum	Hexaploid	Landrace	PI 127098	Free-threshing	6	Afghanistan	C	T	C	GC	C	G	T	T	T	C	A	T	C	C	G	C	G	G	G	G	G
Triticum aestivum ssp. aestivum	Hexaploid	Landrace	PI 351046	Free-threshing	6	Austria	C	T	C	GC	C	G	T	T	T	C	A	T	C	C	G	C	G	G	G	G	G
Triticum aestivum ssp. aestivum	Hexaploid	Landrace	PI 184157	Free-threshing	6	Bosnia and Herzegovina	C	T	C	GC	C	G	T	T	T	C	A	T	C	C	G	C	G	G	G	G	G
Triticum aestivum ssp. aestivum	Hexaploid	Landrace	BMZ	Free-threshing	6	China	C	T	C	GC	C	G	T	T	T	C	A	T	C	C	G	C	G	G	G	G	G
Triticum aestivum ssp. aestivum	Hexaploid	Landrace	PI 153785	Free-threshing	6	Brazil	C	T	C	GC	C	G	T	T	T	C	A	T	C	C	G	C	G	G	G	G	G
Triticum aestivum ssp. aestivum	Hexaploid	Landrace	PI 349442	Free-threshing	6	Switzerland	C	T	C	GC	C	G	T	T	T	C	A	T	C	C	G	C	G	G	G	G	G
Triticum aestivum ssp. aestivum	Hexaploid	Landrace	CYHM	Free-threshing	6	China	C	T	C	TT/GC	C	G	T	T	T	C	A	T	C	C	G	C	G	G	G	G	G
Triticum aestivum ssp. aestivum	Hexaploid	Landrace	PI 278249	Free-threshing	6	Germany	C	T	C	GC	C	G	T	T	T	C	A	T	C	C	G	C	G	G	G	G	G
Triticum aestivum ssp. aestivum	Hexaploid	Landrace	DHM	Free-threshing	6	China	C	T	C	GC	C	G	T	T	T	C	A	T	C	C	G	C	G	G	G	G	G
Triticum aestivum ssp. aestivum	Hexaploid	Landrace	DXHKYM	Free-threshing	6	China	C	T	C	GC	C	G	T	T	T	C	A	T	C	C	G	C	G	G	G	G	G
Triticum aestivum ssp. aestivum	Hexaploid	Landrace	PI 58075	Free-threshing	6	Spain	C	T	C	GC	C	G	T	T	T	C	A	T	C	C	G	C	G	G	G	G	G
Triticum aestivum ssp. aestivum	Hexaploid	Landrace	PI 278589	Free-threshing	6	United Kingdom	C	T	C	GC	C	G	T	T	T	C	A	T	C	C	G	C	G	G	G	G	G
Triticum aestivum ssp. aestivum	Hexaploid	Landrace	PI 43250	Free-threshing	6	Greece	C	T	C	GC	C	G	T	T	T	C	A	T	C	C	G	C	G	G	G	G	G
Triticum aestivum ssp. aestivum	Hexaploid	Landrace	HCM	Free-threshing	6	China	C	T	C	GC	C	G	T	T	T	C	A	T	C	C	G	C	G	G	G	G	G
Triticum aestivum ssp. aestivum	Hexaploid	Landrace	HLM	Free-threshing	6	China	C	T	C	GC	C	G	T	T	T	C	A	T	C	C	G	C	G	G	G	G	G
Triticum aestivum ssp. aestivum	Hexaploid	Landrace	HMM	Free-threshing	6	China	C	T	C	GC	C	G	T	T	T	C	A	T	C	C	G	C	G	G	G	G	G
Triticum aestivum ssp. aestivum	Hexaploid	Landrace	PI 264961	Free-threshing	6	Croatia	C	T	C	GC	C	G	T	T	T	C	A	T	C	C	G	C	G	G	G	G	G
Triticum aestivum ssp. aestivum	Hexaploid	Landrace	PI 272374	Free-threshing	6	Hungary	C	T	C	TT/GC	C	G	T	T	T	C	A	T	C	C	G	C	G	G	G	G	G
Triticum aestivum ssp. aestivum	Hexaploid	Landrace	PI 57902	Free-threshing	6	India	C	T	C	GC	C	G	T	T	T	C	A	T	C	C	G	C	G	G	G	G	G
Triticum aestivum ssp. aestivum	Hexaploid	Landrace	PI 430032	Free-threshing	6	India	C	T	C	GC	C	G	T	T	T	C	A	T	C	C	G	C	G	G	G	G	G
Triticum aestivum ssp. aestivum	Hexaploid	Landrace	PI 45325	Free-threshing	6	Iran	C	T	C	GC	C	G	T	T	T	C	A	T	C	C	G	C	G	G	G	G	G
Triticum aestivum ssp. aestivum	Hexaploid	Landrace	PI 268312	Free-threshing	6	Iran	C	T	C	GC	C	G	T	T	T	C	A	T	C	C	G	C	G	G	G	G	G
Triticum aestivum ssp. aestivum	Hexaploid	Landrace	PI 70705	Free-threshing	6	Iraq	C	T	C	GC	C	G	T	T	T	C	A	T	C	C	G	C	G	G	G	G	G
Triticum aestivum ssp. aestivum	Hexaploid	Landrace	PI 208899	Free-threshing	6	Iraq	C	T	C	GC	C	G	T	T	T	C	A	T	C	C	G	C	G	G	G	G	G
Triticum aestivum ssp. aestivum	Hexaploid	Landrace	PI 65564	Free-threshing	6	Italy	C	T	C	GC	C	G	T	T	T	C	A	T	C	C	G	C	G	G	G	G	G
Triticum aestivum ssp. aestivum	Hexaploid	Landrace	PI 157949	Free-threshing	6	Italy	C	T	C	GC	C	G	T	T	T	C	A	T	C	C	G	C	G	G	G	G	G
Triticum aestivum ssp. aestivum	Hexaploid	Landrace	PI 191347	Free-threshing	6	Japan	C	T	C	GC	C	G	T	T	T	C	A	T	C	C	G	C	G	G	G	G	G
Triticum aestivum ssp. aestivum	Hexaploid	Landrace	PI 639304	Free-threshing	6	Kazakhstan	C	T	C	GC	C	G	T	T	T	C	A	T	C	C	G	C	G	G	G	G	G
Triticum aestivum ssp. aestivum	Hexaploid	Landrace	LM	Free-threshing	6	China	C	T	C	GC	C	G	T	T	T	C	A	T	C	C	G	C	G	G	G	G	G
Triticum aestivum ssp. aestivum	Hexaploid	Landrace	LZT	Free-threshing	6	China	C	T	C	GC	C	G	T	T	T	C	A	T	C	C	G	C	G	G	G	G	G
Triticum aestivum ssp. aestivum	Hexaploid	Landrace	CItr 2804	Free-threshing	6	Mexico	C	T	C	GC	C	G	T	T	T	C	A	T	C	C	G	C	G	G	G	G	G
Triticum aestivum ssp. aestivum	Hexaploid	Landrace	PI 345238	Free-threshing	6	Macedonia	C	T	C	GC	C	G	T	T	T	C	A	T	C	C	G	C	G	G	G	G	G
Triticum aestivum ssp. aestivum	Hexaploid	Landrace	PI 51688	Free-threshing	6	NEthiopiaerlands	C	T	C	GC	C	G	T	T	T	C	A	T	C	C	G	C	G	G	G	G	G
Triticum aestivum ssp. aestivum	Hexaploid	Landrace	PI 40944	Free-threshing	6	Pakistan	C	T	C	GC	C	G	T	T	T	C	A	T	C	C	G	C	G	G	G	G	G
Triticum aestivum ssp. aestivum	Hexaploid	Landrace	PI 40956	Free-threshing	6	Pakistan	C	T	C	GC	C	G	T	T	T	C	A	T	C	C	G	C	G	G	G	G	G
Triticum aestivum ssp. aestivum	Hexaploid	Landrace	PI 40967	Free-threshing	6	Pakistan	C	T	C	GC	C	G	T	T	T	C	A	T	C	C	G	C	G	G	G	G	G
Triticum aestivum ssp. aestivum	Hexaploid	Landrace	PI 192808	Free-threshing	6	Portugal	C	T	C	GC	C	G	T	T	T	C	A	T	C	C	G	C	G	G	G	G	G
Triticum aestivum ssp. aestivum	Hexaploid	Landrace	CItr 2608	Free-threshing	6	Romania	C	T	C	GC	C	G	T	T	T	C	A	T	C	C	G	C	G	G	G	G	G
Triticum aestivum ssp. aestivum	Hexaploid	Landrace	CItr 11478	Free-threshing	6	Soviet Union	C	T	C	GC	C	G	T	T	T	C	A	T	C	C	G	C	G	G	G	G	G
Triticum aestivum ssp. aestivum	Hexaploid	Landrace	PI 184168	Free-threshing	6	Serbia	C	T	C	GC	C	G	T	T	T	C	A	T	C	C	G	C	G	G	G	G	G
Triticum aestivum ssp. aestivum	Hexaploid	Landrace	PI 192569	Free-threshing	6	Sweden	C	T	C	GC	C	G	T	T	T	C	A	T	C	C	G	C	G	G	G	G	G
Triticum aestivum ssp. aestivum	Hexaploid	Landrace	PI 182707	Free-threshing	6	Syria	C	T	C	GC	C	G	T	T	T	C	A	T	C	C	G	C	G	G	G	G	G
Triticum aestivum ssp. aestivum	Hexaploid	Landrace	PI 639416	Free-threshing	6	Tajikistan	C	T	C	GC	C	G	T	T	T	C	A	T	C	C	G	C	G	G	G	G	G
Triticum aestivum ssp. aestivum	Hexaploid	Landrace	PI 165114	Free-threshing	6	Turkey	C	T	C	GC	C	G	T	T	T	C	A	T	C	C	G	C	G	G	G	G	G
Triticum aestivum ssp. aestivum	Hexaploid	Landrace	PI 166770	Free-threshing	6	Turkey	C	T	C	GC	C	G	T	T	T	C	A	T	C	C	G	C	G	G	G	G	G
Triticum aestivum ssp. aestivum	Hexaploid	Landrace	PI 470581	Free-threshing	6	Turkey	C	T	C	GC	C	G	T	T	T	C	A	T	C	C	G	C	G	G	G	G	G
Triticum aestivum ssp. aestivum	Hexaploid	Landrace	PI 583718	Free-threshing	6	Canada	C	T	C	GC	C	G	T	T	T	C	A	T	C	C	G	C	G	G	G	G	G
Triticum aestivum ssp. aestivum	Hexaploid	Landrace	PI 481712	Free-threshing	6	Bhutan	C	T	C	GC	C	G	T	T	T	C	A	T	C	C	G	C	G	G	G	G	G
Triticum aestivum ssp. aestivum	Hexaploid	Landrace	PI 153785	Free-threshing	6	Brazil	C	T	C	GC	C	G	T	T	T	C	A	T	C	C	G	C	G	G	G	G	G
Triticum aestivum ssp. aestivum	Hexaploid	Landrace	PI 52227	Free-threshing	6	Sudan	C	T	C	GC	C	G	T	NA	T	C	A	T	C	C	G	C	NA	NA	G	NA	NA
Triticum aestivum ssp. aestivum	Hexaploid	Landrace	PI 41021	Free-threshing	6	Ukraine	C	T	C	GC	C	G	T	T	T	C	A	T	C	C	G	C	G	G	G	G	G
Triticum aestivum ssp. aestivum	Hexaploid	Landrace	PI 94468	Free-threshing	6	Ukraine	C	T	C	GC	C	G	T	T	T	C	A	T	C	C	G	C	G	G	G	G	G
Triticum aestivum ssp. aestivum	Hexaploid	Landrace	PI 43344	Free-threshing	6	Uruguay	C	T	C	GC	C	G	T	T	T	C	A	T	C	C	G	C	G	G	G	G	G
Triticum aestivum ssp. aestivum	Hexaploid	Landrace	PI 43364	Free-threshing	6	Uruguay	C	T	C	GC	C	G	T	T	T	C	A	T	C	C	G	C	G	G	G	G	G
Triticum aestivum ssp. aestivum	Hexaploid	Landrace	PI 94532	Free-threshing	6	Uzbekistan	C	T	C	GC	C	G	T	T	T	C	A	T	C	C	G	C	G	G	G	G	G
Triticum aestivum ssp. aestivum	Hexaploid	Landrace	YM	Free-threshing	6	China	C	T	C	GC	C	G	T	T	T	C	A	T	C	C	G	C	G	G	G	G	G
Triticum aestivum ssp. aestivum	Hexaploid	Landrace	ZJH	Free-threshing	6	China	C	T	C	GC	C	G	T	T	T	C	A	T	C	C	G	C	G	G	G	G	G
Triticum aestivum ssp. aestivum	Hexaploid	Cultivar	BJBH	Free-threshing	6	China	C	T	C	GC	C	G	T	T	T	C	A	T	C	C	G	C	G	G	G	G	G
Triticum aestivum ssp. aestivum	Hexaploid	Cultivar	CAN-C1	Free-threshing	6	Canada	C	T	C	GC	C	G	T	T	T	C	A	T	C	C	G	C	G	G	G	G	G
Triticum aestivum ssp. aestivum	Hexaploid	Cultivar	CItr 14038/PI 298407	Free-threshing	6	Chile	C	T	C	GC	C	G	T	T	T	C	A	T	C	C	G	C	G	G	G	G	G
Triticum aestivum ssp. aestivum	Hexaploid	Cultivar	CZ6406	Free-threshing	6	China	C	T	C	GC	C	G	T	T	T	C	A	T	C	C	G	C	G	G	G	G	G
Triticum aestivum ssp. aestivum	Hexaploid	Cultivar	FMSY	Free-threshing	6	China	C	T	C	GC	C	G	T	T	T	C	A	T	C	C	G	C	G	G	G	G	G
Triticum aestivum ssp. aestivum	Hexaploid	Cultivar	FRA-C1	Free-threshing	6	France	C	T	C	GC	C	G	T	T	T	C	A	T	C	C	G	C	G	G	G	G	G
Triticum aestivum ssp. aestivum	Hexaploid	Cultivar	GYWLL	Free-threshing	6	China	C	T	C	GC	C	G	T	T	T	C	A	T	C	C	G	C	G	G	G	G	G
Triticum aestivum ssp. aestivum	Hexaploid	Cultivar	HNSH	Free-threshing	6	China	C	T	C	GC	C	G	T	T	T	C	A	T	C	C	G	C	G	G	G	G	G
Triticum aestivum ssp. aestivum	Hexaploid	Cultivar	PI 231372	Free-threshing	6	Italy	C	T	C	GC	C	G	T	T	T	C	A	T	C	C	G	C	G	G	G	G	G
Triticum aestivum ssp. aestivum	Hexaploid	Cultivar	JCYLYL	Free-threshing	6	China	C	T	C	GC	C	G	T	T	T	C	A	T	C	C	G	C	G	G	G	G	G
Triticum aestivum ssp. aestivum	Hexaploid	Cultivar	JM8H	Free-threshing	6	China	C	T	C	GC	C	G	T	T	T	C	A	T	C	C	G	C	G	G	G	G	G
Triticum aestivum ssp. aestivum	Hexaploid	Cultivar	KFEH	Free-threshing	6	China	C	T	C	GC	C	G	T	T	T	C	A	T	C	C	G	C	G	G	G	G	G
Triticum aestivum ssp. aestivum	Hexaploid	Cultivar	KFSH	Free-threshing	6	China	C	T	C	GC	C	G	T	T	T	C	A	T	C	C	G	C	G	G	G	G	G
Triticum aestivum ssp. aestivum	Hexaploid	Cultivar	KXSH	Free-threshing	6	China	C	T	C	TT/GC	C	G	T	T	T	C	A	T	C	C	G	C	G	G	G	G	G
Triticum aestivum ssp. aestivum	Hexaploid	Cultivar	NLD-C1	Free-threshing	6	NEthiopiaerlands	C	T	C	GC	C	G	T	T	T	C	A	T	C	C	G	C	G	G	G	G	G
Triticum aestivum ssp. aestivum	Hexaploid	Cultivar	NXWH	Free-threshing	6	China	C	T	C	GC	C	G	T	T	T	C	A	T	C	C	G	C	G	G	G	G	G
Triticum aestivum ssp. aestivum	Hexaploid	Cultivar	PI 593047	Free-threshing	6	America	C	T	C	GC	C	G	T	T	T	C	A	T	C	C	G	C	G	G	G	G	G
Triticum aestivum ssp. aestivum	Hexaploid	Cultivar	XYLH	Free-threshing	6	China	C	T	C	GC	C	G	T	T	T	C	A	T	C	C	G	C	G	G	G	G	G
Triticum aestivum ssp. aestivum	Hexaploid	Cultivar	YASY	Free-threshing	6	China	C	T	C	GC	C	G	T	T	T	C	A	T	C	C	G	C	G	G	G	G	G
Triticum aestivum ssp. aestivum	Hexaploid	Cultivar	YNSW	Free-threshing	6	China	C	T	C	GC	C	G	T	T	T	C	A	T	C	C	G	C	G	G	G	G	G
Triticum aestivum ssp. aestivum	Hexaploid	Cultivar	ZDSH	Free-threshing	6	China	C	T	C	GC	C	G	T	T	T	C	A	T	C	C	G	C	G	G	G	G	G
Triticum aestivum ssp. aestivum	Hexaploid	Cultivar	ZYJWLQ	Free-threshing	6	China	C	T	C	GC	C	G	T	T	T	C	A	T	C	C	G	C	G	G	G	G	G
Triticum aestivum ssp. compactum	Hexaploid	Club wheat	PI 572851	Free-threshing	6	Pakistan	C	T	C	NA	C	G	T	T	T	C	A	T	C	C	G	C	G	G	G	G	G
Triticum aestivum ssp. compactum	Hexaploid	Club wheat	PI 470735	Free-threshing	6	Turkey	C	T	C	GC	C	G	T	T	T	C	A	T	C	C	G	C	G	G	G	G	G
Triticum aestivum ssp. compactum	Hexaploid	Club wheat	PI 341432	Free-threshing	6	Turkey	C	T	C	GC	C	G	T	T	T	C	A	T	C	C	G	C	G	G	G	G	G
Triticum aestivum ssp. compactum	Hexaploid	Club wheat	PI 60740	Free-threshing	6	Egypt	C	T	C	NA	C	G	T	T	T	C	A	T	C	C	G	C	G	G	G	G	G
Triticum aestivum ssp. compactum	Hexaploid	Club wheat	PI 366118	Free-threshing	6	Egypt	C	T	C	GC	C	G	T	T	T	C	A	T	C	C	G	C	G	G	G	G	G
Triticum aestivum ssp. sphaerococcum	Hexaploid	Indian dwarf wheat	PI 42013	Free-threshing	6	India	C	T	C	GC	C	G	T	T	T	C	A	T	C	C	G	C	G	G	G	G	G
Triticum aestivum ssp. sphaerococcum	Hexaploid	Indian dwarf wheat	PI 40942	Free-threshing	6	Pakistan	C	T	C	NA	C	G	T	T	T	C	A	T	C	C	G	C	G	G	G	G	G
Triticum aestivum ssp. sphaerococcum	Hexaploid	Indian dwarf wheat	PI 277164	Free-threshing	6	Pakistan	C	T	C	GC	C	G	T	T	T	C	A	T	C	C	G	C	G	G	G	G	G
Triticum aestivum ssp. sphaerococcum	Hexaploid	Indian dwarf wheat	PI 337997	Free-threshing	6	India	C	T	C	GC	C	G	T	T	T	C	A	T	C	C	G	C	G	G	G	G	G
Triticum aestivum ssp. sphaerococcum	Hexaploid	Indian dwarf wheat	PI 182118	Free-threshing	6	Pakistan	C	T	C	GC	C	G	T	T	T	C	A	T	C	C	G	C	G	G	G	G	G
Triticum aestivum ssp. petropavlovskyi	Hexaploid	Xinjiang wheat	PI 585015	Free-threshing	6	China	C	T	C	GC	C	G	T	T	T	C	A	T	C	C	G	C	G	G	G	G	G
Triticum aestivum ssp. petropavlovskyi	Hexaploid	Xinjiang wheat	IG 45115	Free-threshing	6	China	C	T	C	NA	C	G	T	T	T	C	A	T	C	C	G	C	G	G	G	G	G
Triticum aestivum ssp. petropavlovskyi	Hexaploid	Xinjiang wheat	TRI 9934	Free-threshing	6	Soviet Union	C	T	C	GC	C	G	T	T	T	C	A	T	C	C	G	C	G	G	G	G	G
Triticum aestivum ssp. petropavlovskyi	Hexaploid	Xinjiang wheat	TRI 12908	Free-threshing	6	NA	C	T	C	GC	C	G	T	T	T	C	A	T	C	C	G	C	G	G	G	G	G
Triticum aestivum ssp. yunnanese	Hexaploid	Yunan wheat	XM0929	Non-free-threshing	6	China	C	T	NA	TT	C	G	T	T	T	C	A	T	C	C	G	C	G	G	G	G	G
Triticum aestivum ssp. yunnanese	Hexaploid	Yunan wheat	XM0939	Non-free-threshing	6	China	C	T	C	NA	C	G	T	T	T	C	A	T	C	C	G	C	G	G	G	G	G
Triticum aestivum ssp. yunnanese	Hexaploid	Yunan wheat	XM0909	Non-free-threshing	6	China	C	T	C	TT	C	G	T	T	T	C	A	T	C	C	G	C	G	G	G	G	G
Triticum turgidum ssp. durum	Tetraploid	Durum	PI 178143	Free-threshing	6	Turkey	C	T	C	TT	NA	G	T	T	T	C	A	T	C	C	G	C	G	G	G	G	G
Triticum turgidum ssp. durum	Tetraploid	Durum	PI 24493	Free-threshing	6	Turkmenistan	C	T	C	TT	C	G	T	T	T	C	A	T	C	C	G	C	G	G	G	G	G
Triticum turgidum ssp. durum	Tetraploid	Durum	PI 623461	Free-threshing	6	Iran	C	T	C	TT	C	G	T	T	T	C	A	T	C	C	G	C	G	G	G	G	G
Triticum turgidum ssp. durum	Tetraploid	Durum	PI 627514	Free-threshing	6	Iran	C	T	C	TT	C	G	T	T	T	C	A	T	C	C	G	C	G	G	G	G	G
Triticum turgidum ssp. durum	Tetraploid	Durum	PI 625273	Free-threshing	6	Iran	C	T	C	TT	C	G	T	T	T	C	A	T	C	C	G	C	G	G	G	G	G
Triticum turgidum ssp. durum	Tetraploid	Durum	PI 627996	Free-threshing	6	Iran	C	T	C	TT	C	G	T	T	T	C	A	T	C	C	G	C	G	G	G	G	G
Triticum turgidum ssp. durum	Tetraploid	Durum	PI 624129	Free-threshing	6	Iran	C	T	C	TT	NA	G	T	T	T	C	NA	NA	NA	NA	NA	NA	NA	NA	G	NA	NA
Triticum turgidum ssp. durum	Tetraploid	Durum	PI 626483	Free-threshing	6	Iran	C	T	C	TT	C	G	T	T	T	C	A	T	C	C	G	C	G	G	G	G	G
Triticum turgidum ssp. durum	Tetraploid	Durum	PI 627942	Free-threshing	6	Iran	C	T	C	TT	C	G	T	T	T	C	A	T	C	C	G	C	G	G	G	G	G
Triticum turgidum ssp. durum	Tetraploid	Durum	PI 32877	Free-threshing	6	Kazakhstan	C	T	C	TT	C	G	T	T	T	C	A	T	C	C	G	C	G	G	G	G	G
Triticum turgidum ssp. durum	Tetraploid	Durum	PI 624388	Free-threshing	6	Iran	C	T	C	TT	C	G	T	T	T	C	A	T	C	C	G	C	G	G	G	G	G
Triticum turgidum ssp. durum	Tetraploid	Durum	PI 166327	Free-threshing	6	Turkey	C	T	C	TT	C	G	T	T	T	C	A	T	C	C	G	C	G	G	G	G	G
Triticum turgidum ssp. durum	Tetraploid	Durum	PI 192051	Free-threshing	6	Portugal	C	T	C	TT	C	G	T	T	T	C	A	T	C	C	G	C	G	G	G	G	G
Triticum turgidum ssp. turanicum	Tetraploid	Khorasan wheat	PI 317492	Free-threshing	6	Afghanistan	C	T	C	TT	C	G	T	NA	T	C	A	T	C	C	G	C	G	G	G	NA	G
Triticum turgidum ssp. turanicum	Tetraploid	Khorasan wheat	PI 272602	Free-threshing	6	Hungary	C	T	C	TT	C	G	T	T	T	C	A	T	C	C	G	C	G	G	G	G	G
Triticum turgidum ssp. turanicum	Tetraploid	Khorasan wheat	PI 184543	Free-threshing	6	Portugal	C	T	NA	TT	C	G	T	T	T	C	A	T	C	C	G	C	G	G	G	G	G
Triticum turgidum ssp. turanicum	Tetraploid	Khorasan wheat	PI 347132	Free-threshing	6	Afghanistan	C	T	C	TT	C	G	T	T	T	C	A	T	C	C	G	C	G	G	G	G	G
Triticum turgidum ssp. turanicum	Tetraploid	Khorasan wheat	PI 624422	Free-threshing	6	Iran	C	T	C	TT	C	G	T	T	T	C	A	T	C	C	G	C	G	G	G	G	G
Triticum turgidum ssp. turanicum	Tetraploid	Khorasan wheat	PI 624421	Free-threshing	6	Iran	NA	NA	C	TT	NA	G	T	T	T	C	A	T	C	C	G	C	G	G	G	G	G
Triticum turgidum ssp. turanicum	Tetraploid	Khorasan wheat	PI 624892	Free-threshing	6	Iran	C	T	C	TT	NA	G	T	T	T	C	A	T	C	NA	NA	NA	G	G	G	G	G
Triticum turgidum ssp. turanicum	Tetraploid	Khorasan wheat	PI 166959	Free-threshing	6	Turkey	C	T	C	TT	C	G	T	T	T	C	A	T	C	C	G	C	G	G	G	G	G
Triticum turgidum ssp. turanicum	Tetraploid	Khorasan wheat	PI 166450	Free-threshing	6	Turkey	C	T	C	TT	C	NA	NA	T	T	C	A	T	NA	C	G	C	G	G	G	G	G
Triticum turgidum ssp. turanicum	Tetraploid	Khorasan wheat	PI 537992	Free-threshing	6	Turkey	NA	NA	C	TT	C	G	T	T	T	C	NA	NA	NA	NA	NA	NA	NA	NA	G	NA	G
Triticum turgidum ssp. polonicum	Tetraploid	Polish wheat	PI 384337	Free-threshing	6	Ethiopia	C	T	C	NA	C	G	T	NA	T	C	A	T	NA	C	G	C	NA	G	G	G	NA
Triticum turgidum ssp. polonicum	Tetraploid	Polish wheat	PI 191823	Free-threshing	6	Portugal	C	T	C	TT	C	G	T	T	T	C	A	T	C	C	G	C	G	G	G	G	G
Triticum turgidum ssp. polonicum	Tetraploid	Polish wheat	PI 272572	Free-threshing	6	Hungary	C	T	C	TT	C	G	T	T	T	C	A	T	C	C	G	C	G	G	G	G	G
Triticum turgidum ssp. polonicum	Tetraploid	Polish wheat	CItr 14892	Free-threshing	6	Ethiopia	C	T	NA	TT	C	G	T	T	T	NA	A	T	C	C	G	C	G	G	G	G	G
Triticum turgidum ssp. polonicum	Tetraploid	Polish wheat	PI 254214	Free-threshing	6	India	C	T	C	TT	C	G	T	T	T	C	A	T	C	C	G	C	G	G	G	G	G
Triticum turgidum ssp. polonicum	Tetraploid	Polish wheat	PI 272568	Free-threshing	6	Hungary	C	T	C	TT	C	G	T	T	T	C	A	T	C	C	G	C	G	G	G	G	G
Triticum turgidum ssp. polonicum	Tetraploid	Polish wheat	PI 167622	Free-threshing	6	Turkey	C	T	C	TT	C	NA	NA	NA	T	C	A	T	C	NA	NA	NA	G	G	G	G	G
Triticum turgidum ssp. polonicum	Tetraploid	Polish wheat	PI 191903	Free-threshing	6	Portugal	C	T	C	TT	C	G	T	T	T	C	A	T	C	C	G	C	G	G	G	G	G
Triticum turgidum ssp. turgidum	Tetraploid	Rivet wheat	PI 272592	Free-threshing	6	Hungary	NA	NA	C	TT	C	G	T	T	T	C	NA	NA	C	C	G	C	G	G	G	G	G
Triticum turgidum ssp. turgidum	Tetraploid	Rivet wheat	CItr 7798	Free-threshing	6	Ethiopia	C	T	C	TT	C	G	T	T	T	C	A	T	C	C	G	C	G	G	G	G	G
Triticum turgidum ssp. turgidum	Tetraploid	Rivet wheat	PI 272587	Free-threshing	6	Hungary	C	T	C	TT	C	G	T	T	T	C	A	T	C	C	G	C	G	G	G	G	G
Triticum turgidum ssp. turgidum	Tetraploid	Rivet wheat	PI 378473	Free-threshing	6	Macedonia	C	T	C	TT	C	G	T	T	T	C	A	T	C	C	G	C	G	G	G	G	G
Triticum turgidum ssp. turgidum	Tetraploid	Rivet wheat	PI 374659	Free-threshing	6	Macedonia	C	T	C	TT	C	G	T	T	T	C	A	T	C	C	G	C	G	G	G	G	G
Triticum turgidum ssp. turgidum	Tetraploid	Rivet wheat	PI 166484	Free-threshing	6	Turkey	C	T	C	TT	C	G	T	T	T	C	A	T	C	C	G	C	G	G	G	G	NA
Triticum turgidum ssp. turgidum	Tetraploid	Rivet wheat	PI 41029	Free-threshing	6	Georgia	C	T	C	TT	C	G	T	T	T	C	A	T	C	C	G	C	G	G	G	G	G
Triticum turgidum ssp. turgidum	Tetraploid	Rivet wheat	PI 620972	Free-threshing	6	Iran	C	T	C	TT	C	G	T	T	T	C	A	T	C	C	G	C	G	G	G	G	NA
Triticum turgidum ssp. turgidum	Tetraploid	Rivet wheat	PI 245751	Free-threshing	6	Turkey	C	T	NA	NA	NA	G	T	T	T	C	A	T	C	C	G	C	G	G	G	G	G
Triticum turgidum ssp. turgidum	Tetraploid	Rivet wheat	PI 341611	Free-threshing	6	Turkey	C	T	C	TT	C	G	T	T	T	C	A	T	C	C	G	C	G	G	G	G	G
Triticum turgidum ssp. turgidum	Tetraploid	Rivet wheat	PI 60715	Free-threshing	6	Egypt	C	T	C	TT	C	G	T	T	T	C	A	T	C	C	G	C	G	G	G	G	G
Triticum aestivum ssp. aestivum	Hexaploid	Landrace	BDHHM	Free-threshing	6	China	C	T	C	TT	C	G	T	T	T	C	A	T	C	C	G	C	G	G	G	G	G
Triticum aestivum ssp. aestivum	Hexaploid	Landrace	BQM	Free-threshing	6	China	C	T	C	TT	C	G	T	T	T	C	A	T	C	C	G	C	G	G	G	G	G
Triticum aestivum ssp. aestivum	Hexaploid	Landrace	BYM	Free-threshing	6	China	C	T	C	TT	C	G	T	T	T	C	A	T	C	C	G	C	G	G	G	G	G
Triticum aestivum ssp. aestivum	Hexaploid	Landrace	DEU-L1	Free-threshing	6	China	C	T	C	TT	C	G	T	T	T	C	A	T	C	C	G	C	G	G	G	G	G
Triticum aestivum ssp. aestivum	Hexaploid	Landrace	DKM	Free-threshing	6	China	C	T	C	TT	C	G	T	T	T	C	A	T	C	C	G	C	G	G	G	G	G
Triticum aestivum ssp. aestivum	Hexaploid	Landrace	DYH	Free-threshing	6	China	C	T	C	TT	C	G	T	T	T	C	A	T	C	C	G	C	G	G	G	G	G
Triticum aestivum ssp. aestivum	Hexaploid	Landrace	HM	Free-threshing	6	China	C	T	C	TT	C	G	T	T	T	C	A	T	C	C	G	C	G	G	G	G	G
Triticum aestivum ssp. aestivum	Hexaploid	Landrace	HTZ	Free-threshing	6	China	C	T	C	TT	C	G	T	T	T	C	A	T	C	C	G	C	G	G	G	G	G
Triticum aestivum ssp. aestivum	Hexaploid	Landrace	HZB	Free-threshing	6	China	C	T	C	TT	C	G	T	T	T	C	A	T	C	C	G	C	G	G	G	G	G
Triticum aestivum ssp. aestivum	Hexaploid	Landrace	JM	Free-threshing	6	China	C	T	C	TT	C	G	T	T	T	C	A	T	C	C	G	C	G	G	G	G	G
Triticum aestivum ssp. aestivum	Hexaploid	Landrace	JiaHM	Free-threshing	6	China	C	T	C	TT	C	G	T	T	T	C	A	T	C	C	G	C	G	G	G	G	G
Triticum aestivum ssp. aestivum	Hexaploid	Landrace	JinHM	Free-threshing	6	China	C	T	C	TT	C	G	T	T	T	C	A	T	C	C	G	C	G	G	G	G	G
Triticum aestivum ssp. aestivum	Hexaploid	Landrace	LGD	Free-threshing	6	China	C	T	C	TT	C	G	T	T	T	C	A	T	C	C	G	C	G	G	G	G	G
Triticum aestivum ssp. aestivum	Hexaploid	Landrace	LLX	Free-threshing	6	China	C	T	C	TT	C	G	T	T	T	C	A	T	C	C	G	C	G	G	G	G	G
Triticum aestivum ssp. aestivum	Hexaploid	Landrace	LTT	Free-threshing	6	China	C	T	C	TT	C	G	T	T	T	C	A	T	C	C	G	C	G	G	G	G	G
Triticum aestivum ssp. aestivum	Hexaploid	Landrace	LXZXM	Free-threshing	6	China	C	T	C	TT	C	G	T	T	T	C	A	T	C	C	G	C	G	G	G	G	G
Triticum aestivum ssp. aestivum	Hexaploid	Landrace	MXM	Free-threshing	6	China	C	T	C	TT	C	G	T	T	T	C	A	T	C	C	G	C	G	G	G	G	G
Triticum aestivum ssp. aestivum	Hexaploid	Landrace	QCM	Free-threshing	6	China	C	T	C	TT	C	G	T	T	T	C	A	T	C	C	G	C	G	G	G	G	G
Triticum aestivum ssp. aestivum	Hexaploid	Landrace	SLZ	Free-threshing	6	China	C	T	C	TT	C	G	T	T	T	C	A	T	C	C	G	C	G	G	G	G	G
Triticum aestivum ssp. aestivum	Hexaploid	Landrace	SM	Free-threshing	6	China	C	T	NA	TT	C	G	T	T	T	C	A	T	C	C	G	C	G	G	G	G	G
Triticum aestivum ssp. aestivum	Hexaploid	Landrace	SRM4H	Free-threshing	6	China	C	T	C	TT	C	G	T	T	T	C	A	T	C	C	G	C	G	G	G	G	G
Triticum aestivum ssp. aestivum	Hexaploid	Landrace	TJBXM	Free-threshing	6	China	C	T	C	TT	C	G	T	T	T	C	A	T	C	C	G	C	G	G	G	G	G
Triticum aestivum ssp. aestivum	Hexaploid	Landrace	TMM	Free-threshing	6	China	C	T	C	TT	C	G	T	T	T	C	A	T	C	C	G	C	G	G	G	G	G
Triticum aestivum ssp. aestivum	Hexaploid	Landrace	PI 345409	Free-threshing	6	Bosnia and Herzegovina	C	T	C	NA	C	G	T	T	T	NA	A	T	C	C	G	C	G	G	G	G	G
Triticum aestivum ssp. aestivum	Hexaploid	Landrace	WYM	Free-threshing	6	China	C	T	C	TT	C	G	T	T	T	C	A	T	C	C	G	C	G	G	G	G	G
Triticum aestivum ssp. aestivum	Hexaploid	Landrace	XFS	Free-threshing	6	China	C	T	C	TT	C	G	T	T	T	C	A	T	C	C	G	C	G	G	G	G	G
Triticum aestivum ssp. aestivum	Hexaploid	Landrace	XHP	Free-threshing	6	China	C	T	C	TT	C	G	T	T	T	C	A	T	C	C	G	C	G	G	G	G	G
Triticum aestivum ssp. aestivum	Hexaploid	Landrace	YMBF	Free-threshing	6	China	C	T	C	TT	C	G	T	T	T	C	A	T	C	C	G	C	G	G	G	G	G
Triticum aestivum ssp. aestivum	Hexaploid	Landrace	YZM	Free-threshing	6	China	C	T	C	TT	C	G	T	T	T	C	A	T	C	C	G	C	G	G	G	G	G
Triticum aestivum ssp. aestivum	Hexaploid	Landrace	ZP	Free-threshing	6	China	C	T	C	TT	C	G	T	T	T	C	A	T	C	C	G	C	G	G	G	G	G
Triticum aestivum ssp. aestivum	Hexaploid	Landrace	ZWT	Free-threshing	6	China	C	T	C	TT	C	G	T	T	T	C	A	T	C	C	G	C	G	G	G	G	G
Triticum aestivum ssp. aestivum	Hexaploid	Cultivar	AMN	Free-threshing	6	China	C	T	C	TT	C	G	T	T	T	C	A	T	C	C	G	C	G	G	G	G	G
Triticum aestivum ssp. aestivum	Hexaploid	Cultivar	PYEQ	Free-threshing	6	China	C	T	C	TT	C	G	T	T	T	C	A	T	C	C	G	C	G	G	G	G	G
Triticum aestivum ssp. aestivum	Hexaploid	Cultivar	PI 9131	Free-threshing	6	Uzbekistan	C	T	C	TT	C	G	T	T	T	C	A	T	C	C	G	C	G	G	G	G	G
Triticum aestivum ssp. aestivum	Hexaploid	Elite variety	Aodesa3	Free-threshing	3	Russia	C	T	C	GC	C	G	T	T	T	C	A	T	C	C	G	C	G	G	G	G	G
Triticum aestivum ssp. aestivum	Hexaploid	Landrace	Baibiansui	Free-threshing	3	China, Shandong	C	T	C	GC	C	G	T	T	T	C	A	T	C	C	G	C	G	G	G	G	G
Triticum aestivum ssp. aestivum	Hexaploid	Landrace	Changmangshibiantou	Free-threshing	3	China, Yunnan	C	T	C	GC	C	G	T	T	T	C	A	T	C	C	G	C	G	G	G	G	G
Triticum aestivum ssp. aestivum	Hexaploid	Landrace	Dabaimai	Free-threshing	3	China, Hebei	C	T	C	GC	C	G	T	T	T	C	A	T	C	C	G	C	G	G	G	G	G
Triticum aestivum ssp. aestivum	Hexaploid	Landrace	Dahuangpi	Free-threshing	3	China, Anhui	C	T	C	GC	C	G	T	T	T	C	A	T	C	C	G	C	G	G	G	G	G
Triticum aestivum ssp. aestivum	Hexaploid	Elite variety	EarlyPremium	Free-threshing	3	USA	C	T	C	GC	C	G	T	T	T	C	A	T	C	C	G	C	G	G	G	G	G
Triticum aestivum ssp. aestivum	Hexaploid	Landrace	Hongmangmai	Free-threshing	3	China, Hebei	C	T	C	GC	C	G	T	T	T	C	A	T	C	C	G	C	G	G	G	G	G
Triticum aestivum ssp. aestivum	Hexaploid	Landrace	Hongmangzi	Free-threshing	3	China, Hubei	C	T	C	GC	C	G	T	T	T	C	A	T	C	C	G	C	G	G	G	G	G
Triticum aestivum ssp. aestivum	Hexaploid	Elite variety	Jinan17	Free-threshing	3	China, Shandong	C	T	C	GC	C	G	T	T	T	C	A	T	C	C	G	C	G	G	G	G	G
Triticum aestivum ssp. aestivum	Hexaploid	Elite variety	Laizhou953	Free-threshing	3	China, Shandong	C	T	C	GC	C	G	T	T	T	C	A	T	C	C	G	C	G	G	G	G	G
Triticum aestivum ssp. aestivum	Hexaploid	Landrace	Laomai	Free-threshing	3	China, Shaanxi	C	T	C	GC	C	G	T	T	T	C	A	T	C	C	G	C	G	G	G	G	G
Triticum aestivum ssp. aestivum	Hexaploid	Landrace	Liuzhutou	Free-threshing	3	China, Jiangsu	C	T	C	GC	C	G	T	T	T	C	A	T	C	C	G	C	G	G	G	G	G
Triticum aestivum ssp. aestivum	Hexaploid	Landrace	Motuoxiaomai	Free-threshing	3	China, Xizang	C	T	C	GC	C	G	T	T	T	C	A	T	C	C	G	C	G	G	G	G	G
Triticum aestivum ssp. aestivum	Hexaploid	Elite variety	Nonglin10	Free-threshing	3	Japan	C	T	C	GC	C	G	T	T	T	C	A	T	C	C	G	C	G	G	G	G	G
Triticum aestivum ssp. aestivum	Hexaploid	Landrace	Paozimai	Free-threshing	3	China, Jiangxi	C	T	C	GC	C	G	T	T	T	C	A	T	C	C	G	C	G	G	G	G	G
Triticum aestivum ssp. aestivum	Hexaploid	Elite variety	Qianjiaomai	Free-threshing	3	Unknown	C	T	C	GC	C	G	T	T	T	C	A	T	C	C	G	C	G	G	G	G	G
Triticum aestivum ssp. aestivum	Hexaploid	Landrace	Sankecun	Free-threshing	3	China, Hubei	C	T	C	GC	C	G	T	T	T	C	A	T	C	C	G	C	G	G	G	G	G
Triticum aestivum ssp. aestivum	Hexaploid	Elite variety	Shijiazhuang407	Free-threshing	3	China, Hebei	C	T	C	GC	C	G	T	T	T	C	A	T	C	C	G	C	G	G	G	G	G
Triticum aestivum ssp. aestivum	Hexaploid	Elite variety	VillaGlori	Free-threshing	3	Italy	C	T	C	GC	C	G	T	T	T	C	A	T	C	C	G	C	G	G	G	G	G
Triticum aestivum ssp. aestivum	Hexaploid	Landrace	Xianyangdasui	Free-threshing	3	China, Shaanxi	C	T	C	GC	C	G	T	T	T	C	A	T	C	C	G	C	G	G	G	G	G
Triticum aestivum ssp. aestivum	Hexaploid	Landrace	Xiaobaimang	Free-threshing	3	China, Hebei	C	T	C	GC	C	G	T	T	T	C	A	T	C	C	G	C	G	G	G	G	G
Triticum aestivum ssp. aestivum	Hexaploid	Elite variety	Xiaoyan6	Free-threshing	3	China, Shaanxi	C	T	C	GC	C	G	T	T	T	C	A	T	C	C	G	C	G	G	G	G	G
Triticum aestivum ssp. aestivum	Hexaploid	Elite variety	Youbaomai	Free-threshing	3	China, Shandong	C	T	C	GC	C	G	T	T	T	C	A	T	C	C	G	C	G	G	G	G	G
Triticum aestivum ssp. aestivum	Hexaploid	Elite variety	Zhengyin4	Free-threshing	3	Italy	C	T	C	GC	C	G	T	T	T	C	A	T	C	C	G	C	G	G	G	G	G
Triticum aestivum ssp. aestivum	Hexaploid	Landrace	Zhugoumai	Free-threshing	3	China, Yunnan	C	T	C	GC	C	G	T	T	T	C	A	T	C	C	G	C	G	G	G	G	G
Triticum aestivum ssp. aestivum	Hexaploid	Landrace	Zhushimai	Free-threshing	3	China, Yunnan	C	T	C	GC	C	G	T	T	T	C	A	T	C	C	G	C	G	G	G	G	G
Triticum aestivum ssp. aestivum	Hexaploid	Landrace	Zijiehong	Free-threshing	3	China, Shandong	C	T	C	GC	C	G	T	T	T	C	A	T	C	C	G	C	G	G	G	G	G
Triticum aestivum ssp. aestivum	Hexaploid	Landrace	Baihuamai	Free-threshing	3	China, Guizhou	C	T	C	TT/GC	C	G	T	T	T	C	A	T	C	C	G	C	G	G	G	G	G
Triticum aestivum ssp. aestivum	Hexaploid	Landrace	Baiqimai	Free-threshing	3	China, Gansu	C	T	C	TT/GC	C	G	T	T	T	C	A	T	C	C	G	C	G	G	G	G	G
Triticum aestivum ssp. aestivum	Hexaploid	Landrace	Fuyanghong	Free-threshing	3	China, Anhui	C	T	C	TT/GC	C	G	T	T	T	C	A	T	C	C	G	C	G	G	G	G	G
Triticum aestivum ssp. aestivum	Hexaploid	Landrace	Honggoudou	Free-threshing	3	China, Henan	C	T	C	TT/GC	C	G	T	T	T	C	A	T	C	C	G	C	G	G	G	G	G
Triticum aestivum ssp. aestivum	Hexaploid	Landrace	Honglaomai	Free-threshing	3	China, Shaanxi	C	T	C	TT/GC	C	G	T	T	T	C	A	T	C	C	G	C	G	G	G	G	G
Triticum aestivum ssp. aestivum	Hexaploid	Landrace	Hongxumai	Free-threshing	3	China, Shaanxi	C	T	C	TT/GC	C	G	T	T	T	C	A	T	C	C	G	C	G	G	G	G	G
Triticum aestivum ssp. aestivum	Hexaploid	Landrace	Louguding	Free-threshing	3	China, Shandong	C	T	C	TT/GC	C	G	T	T	T	C	A	T	C	C	G	C	G	G	G	G	G
Triticum aestivum ssp. aestivum	Hexaploid	Elite variety	Triumph	Free-threshing	3	USA	C	T	C	TT/GC	C	G	T	T	T	C	A	T	C	C	G	C	G	G	G	G	G
Triticum aestivum ssp. aestivum	Hexaploid	Elite variety	Aimengniu	Free-threshing	3	China, Shandong	C	T	C	TT	C	G	T	T	T	C	A	T	C	C	G	C	G	G	G	G	G
Triticum aestivum ssp. aestivum	Hexaploid	Landrace	Baidatou	Free-threshing	3	China, Gansu	C	T	C	TT	C	G	T	T	T	C	A	T	C	C	G	C	G	G	G	G	G
Triticum aestivum ssp. aestivum	Hexaploid	Landrace	Baimaizi	Free-threshing	3	China, Sichuan	C	T	C	TT	C	G	T	T	T	C	A	T	C	C	G	C	G	G	G	G	G
Triticum aestivum ssp. aestivum	Hexaploid	Landrace	Baimangmai	Free-threshing	3	China, Guizhou	C	T	C	TT	C	G	T	T	T	C	A	T	C	C	G	C	G	G	G	G	G
Triticum aestivum ssp. aestivum	Hexaploid	Landrace	BaipuLuoqing	Free-threshing	3	China, Zhejiang	C	T	C	TT	C	G	T	T	T	C	A	T	C	C	G	C	G	G	G	G	G
Triticum aestivum ssp. aestivum	Hexaploid	Landrace	Baiqiumai	Free-threshing	3	China, Hebei	C	T	C	TT	C	G	T	T	T	C	A	T	C	C	G	C	G	G	G	G	G
Triticum aestivum ssp. aestivum	Hexaploid	Landrace	Baituzitou	Free-threshing	3	China, Shandong	C	T	C	TT	C	G	T	T	T	C	A	T	C	C	G	C	G	G	G	G	G
Triticum aestivum ssp. aestivum	Hexaploid	Landrace	Banjiemang	Free-threshing	3	China, Jiangsu	C	T	C	TT	C	G	T	T	T	C	A	T	C	C	G	C	G	G	G	G	G
Triticum aestivum ssp. aestivum	Hexaploid	Landrace	Bendihuanghuamai	Free-threshing	3	China, Sichuan	C	T	C	TT	C	G	T	T	T	C	A	T	C	C	G	C	G	G	G	G	G
Triticum aestivum ssp. aestivum	Hexaploid	Landrace	Chanbuzhi	Free-threshing	3	China, Anhui	C	T	C	TT	C	G	T	T	T	C	A	T	C	C	G	C	G	G	G	G	G
Triticum aestivum ssp. aestivum	Hexaploid	Landrace	Dachunbaisilengmai	Free-threshing	3	China, Sichuan	C	T	C	TT	C	G	T	T	T	C	A	T	C	C	G	C	G	G	G	G	G
Triticum aestivum ssp. aestivum	Hexaploid	Landrace	Daimanghongmai	Free-threshing	3	China, Tianjin	C	T	C	TT	C	G	T	T	T	C	A	T	C	C	G	C	G	G	G	G	G
Triticum aestivum ssp. aestivum	Hexaploid	Landrace	Dakoumai	Free-threshing	3	China, Henan	C	T	C	TT	C	G	T	T	T	C	A	T	C	C	G	C	G	G	G	G	G
Triticum aestivum ssp. aestivum	Hexaploid	Landrace	Dalibanmang	Free-threshing	3	China, Shandong	C	T	C	TT	C	G	T	T	T	C	A	T	C	C	G	C	G	G	G	G	G
Triticum aestivum ssp. aestivum	Hexaploid	Landrace	Dayuhua	Free-threshing	3	China, Jiangsu	C	T	C	TT	C	G	T	T	T	C	A	T	C	C	G	C	G	G	G	G	G
Triticum aestivum ssp. aestivum	Hexaploid	Landrace	Fumai	Free-threshing	3	China, Henan	C	T	C	TT	C	G	T	T	T	C	A	T	C	C	G	C	G	G	G	G	G
Triticum aestivum ssp. aestivum	Hexaploid	Elite variety	Funo	Free-threshing	3	Italy	C	T	C	TT	C	G	T	T	T	C	A	T	C	C	G	C	G	G	G	G	G
Triticum aestivum ssp. aestivum	Hexaploid	Landrace	Hanzhongbai	Free-threshing	3	China, Shaanxi	C	T	C	TT	C	G	T	T	T	C	A	T	C	C	G	C	G	G	G	G	G
Triticum aestivum ssp. aestivum	Hexaploid	Landrace	Hongheshangtou	Free-threshing	3	China, Henan	C	T	C	TT	C	G	T	T	T	C	A	T	C	C	G	C	G	G	G	G	G
Triticum aestivum ssp. aestivum	Hexaploid	Landrace	Honghuamai	Free-threshing	3	China, Sichuan	C	T	C	TT	C	G	T	T	T	C	A	T	C	C	G	C	G	G	G	G	G
Triticum aestivum ssp. aestivum	Hexaploid	Landrace	Hongjinmai	Free-threshing	3	China, Gansu	C	T	C	TT	C	G	T	T	T	C	A	T	C	C	G	C	G	G	G	G	G
Triticum aestivum ssp. aestivum	Hexaploid	Landrace	Hongmai	Free-threshing	3	China, Hebei	C	T	C	TT	C	G	T	T	T	C	A	T	C	C	G	C	G	G	G	G	G
Triticum aestivum ssp. aestivum	Hexaploid	Landrace	Hongpidongmai	Free-threshing	3	China, Shanxi	C	T	C	TT	C	G	T	T	T	C	A	T	C	C	G	C	G	G	G	G	G
Triticum aestivum ssp. aestivum	Hexaploid	Landrace	Huangguaxian	Free-threshing	3	China, Shandong	C	T	C	TT	C	G	T	T	T	C	A	T	C	C	G	C	G	G	G	G	G
Triticum aestivum ssp. aestivum	Hexaploid	Landrace	Huangshuibai	Free-threshing	3	China, Zhejiang	C	T	C	TT	C	G	T	T	T	C	A	T	C	C	G	C	G	G	G	G	G
Triticum aestivum ssp. aestivum	Hexaploid	Landrace	Huanxiangguo	Free-threshing	3	China, Sichuan	C	T	C	TT	C	G	T	T	T	C	A	T	C	C	G	C	G	G	G	G	G
Triticum aestivum ssp. aestivum	Hexaploid	Landrace	Huomai	Free-threshing	3	China, Henan	C	T	C	TT	C	G	T	T	T	C	A	T	C	C	G	C	G	G	G	G	G
Triticum aestivum ssp. aestivum	Hexaploid	Landrace	Jiahongmai	Free-threshing	3	China, Shanxi	C	T	C	TT	C	G	T	T	T	C	A	T	C	C	G	C	G	G	G	G	G
Triticum aestivum ssp. aestivum	Hexaploid	Landrace	Jiangdongmen	Free-threshing	3	China, Jiangsu	C	T	C	TT	C	G	T	T	T	C	A	T	C	C	G	C	G	G	G	G	G
Triticum aestivum ssp. aestivum	Hexaploid	Landrace	Jiangmai	Free-threshing	3	China, Guizhou	C	T	C	TT	C	G	T	T	T	C	A	T	C	C	G	C	G	G	G	G	G
Triticum aestivum ssp. aestivum	Hexaploid	Landrace	Lanhuamai	Free-threshing	3	China, Gansu	C	T	C	TT	C	G	T	T	T	C	A	T	C	C	G	C	G	G	G	G	G
Triticum aestivum ssp. aestivum	Hexaploid	Landrace	Laolaixia	Free-threshing	3	China, Shandong	C	T	C	TT	C	G	T	T	T	C	A	T	C	C	G	C	G	G	G	G	G
Triticum aestivum ssp. aestivum	Hexaploid	Landrace	Laoqimai	Free-threshing	3	China, Shaanxi	C	T	C	TT	C	G	T	T	T	C	A	T	C	C	G	C	G	G	G	G	G
Triticum aestivum ssp. aestivum	Hexaploid	Landrace	Laotutou	Free-threshing	3	China, Ningxia	C	T	C	TT	C	G	T	T	T	C	A	T	C	C	G	C	G	G	G	G	G
Triticum aestivum ssp. aestivum	Hexaploid	Elite variety	Lovrin10	Free-threshing	3	Romania	C	T	C	TT	C	G	T	T	T	C	A	T	C	C	G	C	G	G	G	G	G
Triticum aestivum ssp. aestivum	Hexaploid	Landrace	Mazhamai	Free-threshing	3	China, Shaanxi	C	T	C	TT	C	G	T	T	T	C	A	T	C	C	G	C	G	G	G	G	G
Triticum aestivum ssp. aestivum	Hexaploid	Landrace	Niuzhijia	Free-threshing	3	China, Shanxi	C	T	C	TT	C	G	T	T	T	C	A	T	C	C	G	C	G	G	G	G	G
Triticum aestivum ssp. aestivum	Hexaploid	Landrace	Panshiwumang	Free-threshing	3	China, Jilin	C	T	C	TT	C	G	T	T	T	C	A	T	C	C	G	C	G	G	G	G	G
Triticum aestivum ssp. aestivum	Hexaploid	Landrace	Sanyuehuang	Free-threshing	3	China, Henan	C	T	C	TT	C	G	T	T	T	C	A	T	C	C	G	C	G	G	G	G	G
Triticum aestivum ssp. aestivum	Hexaploid	Landrace	Shanxibaimai	Free-threshing	3	China, Gansu	C	T	C	TT	C	G	T	T	T	C	A	T	C	C	G	C	G	G	G	G	G
Triticum aestivum ssp. aestivum	Hexaploid	Landrace	Shuilizhan	Free-threshing	3	China, Jiangxi	C	T	C	TT	C	G	T	T	T	C	A	T	C	C	G	C	G	G	G	G	G
Triticum aestivum ssp. aestivum	Hexaploid	Landrace	Suotiaohongmai	Free-threshing	3	China, Shaanxi	C	T	C	TT	C	G	T	T	T	C	A	T	C	C	G	C	G	G	G	G	G
Triticum aestivum ssp. aestivum	Hexaploid	Landrace	Tongjiabaxiaomai	Free-threshing	3	China, Sichuan	C	T	C	TT	C	G	T	T	T	C	A	T	C	C	G	C	G	G	G	G	G
Triticum aestivum ssp. aestivum	Hexaploid	Landrace	Xiaofoshou	Free-threshing	3	China, Henan	C	T	C	TT	C	G	T	T	T	C	A	T	C	C	G	C	G	G	G	G	G
Triticum aestivum ssp. aestivum	Hexaploid	Landrace	Xiaokouhong	Free-threshing	3	China, Liaoning	C	T	C	TT	C	G	T	T	T	C	A	T	C	C	G	C	G	G	G	G	G
Triticum aestivum ssp. aestivum	Hexaploid	Elite variety	Xindong2	Free-threshing	3	China, Xinjiang	C	T	C	TT	C	G	T	T	T	C	A	T	C	C	G	C	G	G	G	G	G
Triticum aestivum ssp. aestivum	Hexaploid	Landrace	Xishanbiansui	Free-threshing	3	China, Shandong	C	T	C	TT	C	G	T	T	T	C	A	T	C	C	G	C	G	G	G	G	G
Triticum aestivum ssp. aestivum	Hexaploid	Landrace	Youmangbaifu	Free-threshing	3	China, Jilin	C	T	C	TT	C	G	T	T	T	C	A	T	C	C	G	C	G	G	G	G	G
Triticum aestivum ssp. aestivum	Hexaploid	Landrace	Youmangsaogudan	Free-threshing	3	China, Henan	C	T	C	TT	C	G	T	T	T	C	A	T	C	C	G	C	G	G	G	G	G
Triticum aestivum ssp. aestivum	Hexaploid	Landrace	Youzimai	Free-threshing	3	China, Henan	C	T	C	TT	C	G	T	T	T	C	A	T	C	C	G	C	G	G	G	G	G
Triticum aestivum ssp. aestivum	Hexaploid	Landrace	Yuqiumai	Free-threshing	3	China, Guizhou	C	T	C	TT	C	G	T	T	T	C	A	T	C	C	G	C	G	G	G	G	G
Triticum aestivum ssp. aestivum	Hexaploid	Landrace	Zaowutian	Free-threshing	3	China, Jiangsu	C	T	C	TT	C	G	T	T	T	C	A	T	C	C	G	C	G	G	G	G	G
Triticum aestivum ssp. aestivum	Hexaploid	Landrace	Zaoxiaomai	Free-threshing	3	China, Zhejiang	C	T	C	TT	C	G	T	T	T	C	A	T	C	C	G	C	G	G	G	G	G
Triticum aestivum ssp. aestivum	Hexaploid	Landrace	Zhuoludongmai	Free-threshing	3	China, Hebei	C	T	C	TT	C	G	T	T	T	C	A	T	C	C	G	C	G	G	G	G	G
Triticum aestivum ssp. aestivum	Hexaploid	Landrace	Zipi	Free-threshing	3	China, Sichuan	C	T	C	TT	C	G	T	T	T	C	A	T	C	C	G	C	G	G	G	G	G
Triticum turgidum ssp. dicoccon	Tetraploid	Domesticated emmer	111926	Non-free-threshing	4	India	NA	NA	NA	NA	C	G	T	T	T	C	A	T	C	C	G	C	G	G	G	G	G
Triticum turgidum ssp. dicoccon	Tetraploid	Domesticated emmer	PI 94673	Non-free-threshing	4	Armenia	NA	NA	NA	NA	C	G	T	T	T	C	A	T	C	C	G	C	G	G	G	G	G
Triticum turgidum ssp. dicoccon	Tetraploid	Domesticated emmer	132232	Non-free-threshing	4	Germany	NA	NA	NA	NA	C	G	T	T	T	C	A	T	C	C	G	C	G	G	G	G	G
Triticum aestivum ssp. spelta	Hexaploid	Spelt	PI 520066	Non-free-threshing	4	Mexico, Ciudad de México	NA	NA	NA	NA	C	G	T	T	T	C	A	T	C	C	G	C	G	G	G	G	G
Triticum aestivum ssp. spelta	Hexaploid	Spelt	PI 168680	Non-free-threshing	4	United States, Washington	NA	NA	NA	NA	C	G	T	T	T	C	A	T	C	C	G	C	G	G	G	G	G
Triticum aestivum ssp. spelta	Hexaploid	Spelt	PI 15865	Non-free-threshing	4	United States, Washington	NA	NA	NA	NA	C	G	T	T	T	C	A	T	C	C	G	C	G	G	G	G	G
Triticum aestivum ssp. spelta	Hexaploid	Spelt	PI 348773	Non-free-threshing	4	Spain, Asturias	NA	NA	NA	NA	C	G	T	T	T	C	A	T	C	C	G	C	G	G	G	G	G
Triticum aestivum ssp. spelta	Hexaploid	Spelt	PI 361768	Non-free-threshing	4	Denmark	NA	NA	NA	NA	C	G	T	T	T	C	A	T	C	C	G	C	G	G	G	G	G
Triticum aestivum ssp. spelta	Hexaploid	Spelt	PI 361813	Non-free-threshing	4	Denmark	NA	NA	NA	NA	C	G	T	T	T	C	A	T	C	C	G	C	G	G	G	G	G
Triticum aestivum ssp. spelta	Hexaploid	Spelt	PI 348360	Non-free-threshing	4	Belgium, Région wallonne	NA	NA	NA	NA	C	G	T	T	T	C	A	T	C	C	G	C	G	G	G	G	G
Triticum aestivum ssp. spelta	Hexaploid	Spelt	PI 355704	Non-free-threshing	4	United Kingdom, England	NA	NA	NA	NA	C	G	T	T	T	C	A	T	C	C	G	C	G	G	G	G	G
Triticum aestivum ssp. spelta	Hexaploid	Spelt	PI 330558	Non-free-threshing	4	United Kingdom, England	NA	NA	NA	NA	C	G	T	T	T	C	A	T	C	C	G	C	G	G	G	G	G
Triticum aestivum ssp. spelta	Hexaploid	Spelt	PI 348141	Non-free-threshing	4	Germany, Baden-Wurttemberg	NA	NA	NA	NA	C	G	T	T	T	C	A	T	C	C	G	C	G	G	G	G	G
Triticum aestivum ssp. spelta	Hexaploid	Spelt	PI 615267	Non-free-threshing	4	Belgium, Région wallonne	NA	NA	NA	NA	C	G	T	T	T	C	A	T	C	C	G	C	G	G	G	G	G
Triticum aestivum ssp. spelta	Hexaploid	Spelt	PI 225271	Non-free-threshing	4	Iran	NA	NA	NA	NA	C	G	T	T	T	C	A	T	C	C	G	C	G	G	G	G	G
Triticum aestivum ssp. macha	Hexaploid	Macha	PI 542466	Non-free-threshing	4	United States, Oregon	NA	NA	NA	NA	C	G	T	T	T	C	A	T	C	C	G	C	G	G	G	G	G
Triticum aestivum ssp. macha	Hexaploid	Macha	PI 572912	Non-free-threshing	4	Georgia, Imereti	NA	NA	NA	NA	C	G	T	T	T	C	A	T	C	C	G	C	G	G	G	G	G
Triticum aestivum ssp. macha	Hexaploid	Macha	PI 352466	Non-free-threshing	4	Former Soviet Union	NA	NA	NA	NA	C	G	T	T	T	C	A	T	C	C	G	C	G	G	G	G	G
Triticum aestivum ssp. aestivum	Hexaploid	Landrace and cultivar	760 accessions (see He et al., 2019)	Free-threshing	4	See He et al., 2019	NA	NA	NA	NA	C	G	T	T	T	C	A	T	C	C	G	C	G	G	G	G	G
Triticum aestivum ssp. compactum	Hexaploid	Club wheat	PI 372151	Free-threshing	4	Armenia	NA	NA	NA	NA	C	G	T	T	T	C	A	T	C	C	G	C	G	G	G	G	G
Triticum aestivum ssp. compactum	Hexaploid	Club wheat	132253	Free-threshing	4	Georgia	NA	NA	NA	NA	C	G	T	T	T	C	A	T	C	C	G	C	G	G	G	G	G
Triticum aestivum ssp. compactum	Hexaploid	Club wheat	132255	Free-threshing	4	Cyprus	NA	NA	NA	NA	C	G	T	T	T	C	A	T	C	C	G	C	G	G	G	G	G
Triticum aestivum ssp. compactum	Hexaploid	Club wheat	132256	Free-threshing	4	Former Soviet Union	NA	NA	NA	NA	C	G	T	T	T	C	A	T	C	C	G	C	G	G	G	G	G
Triticum aestivum ssp. sphaerococcum	Hexaploid	Indian dwarf wheat	101198	Free-threshing	4	India	NA	NA	NA	NA	C	G	T	T	T	C	A	T	C	C	G	C	G	G	G	G	G
Triticum aestivum ssp. sphaerococcum	Hexaploid	Indian dwarf wheat	PI 190982	Free-threshing	4	Belgium	NA	NA	NA	NA	C	G	T	T	T	C	A	T	C	C	G	C	G	G	G	G	G
Triticum aestivum ssp. sphaerococcum	Hexaploid	Indian dwarf wheat	PI 330556	Free-threshing	4	United Kingdom, England	NA	NA	NA	NA	C	G	T	T	T	C	A	T	C	C	G	C	G	G	G	G	G
Triticum aestivum ssp. aestivum	Hexaploid	Landrace	PI 36390	Free-threshing	4	Bolivia, Oruro	NA	NA	NA	NA	C	G	T	T	T/G	C	A	T	C	C	G	C	G	G	G	G	G
Triticum aestivum ssp. aestivum	Hexaploid	Unknown	PI 462106	Free-threshing	4	Yemen, Şāʻdah	NA	NA	NA	NA	C	G	T	T	T/G	C	A	T	C	C	G	C	G	G	G	G	G
Triticum aestivum ssp. aestivum	Hexaploid	Landrace	PI 374249	Free-threshing	4	Chad, Lac	NA	NA	NA	NA	C	G	T	T	T/G	C	A	T	C	C	G	C	G	G	G	G	G
Triticum aestivum ssp. aestivum	Hexaploid	Cultivar	PI 352190	Free-threshing	4	Colombia, Cundinamarca	NA	NA	NA	NA	C	G	T	T	T/G	C	A	T	C	C	G	C	G	G	G	G	G
Triticum aestivum ssp. aestivum	Hexaploid	Cultivar	105558	Free-threshing	4	Former Soviet Union	NA	NA	NA	NA	C	G	T	T	T/G	C	A	T	C	C	G	C	G	G	G	G	G
Triticum aestivum ssp. aestivum	Hexaploid	Cultivar	PI 170911	Free-threshing	4	South Africa, Transvaal	NA	NA	NA	NA	C	G	T	T	T/G	C	A	T	C	C	G	C	G	G	G	G	G
Triticum aestivum ssp. aestivum	Hexaploid	Cultivar	PI 372150	Free-threshing	4	Tajikistan	NA	NA	NA	NA	C	G	T	T	T/G	C	A	T	C	C	G	C	G	G	G	G	G
Triticum aestivum ssp. aestivum	Hexaploid	Cultivar	PI 586955	Free-threshing	4	United States, Kansas	NA	NA	NA	NA	C	G	T	T	T/G	C	A	T	C	C	G	C	G	G	G	G	G
Triticum aestivum ssp. aestivum	Hexaploid	Landrace	PI 347180	Free-threshing	4	Afghanistan, Lōgar	NA	NA	NA	NA	C	G	T	T	T/G	C	A	T	C	C	G	C	G	G	G	G	G
Triticum aestivum ssp. aestivum	Hexaploid	Landrace	131940	Free-threshing	4	Former Soviet Union	NA	NA	NA	NA	C	G	T	T	T/G	C	A	T	C	C	G	C	G	G	G	G	G
Triticum aestivum ssp. aestivum	Hexaploid	Cultivar	101075	Free-threshing	4	France	NA	NA	NA	NA	C	G	T	T	T/G	C	A	T	C	C	G	C	G	G	G	G	G
Triticum aestivum ssp. aestivum	Hexaploid	Landrace	132106	Free-threshing	4	Iran	NA	NA	NA	NA	C	G	T	T	T/G	C	A	T	C	C	G	C	G	G	G	G	G
Triticum turgidum ssp. dicoccon	Tetraploid	Domesticated emmer	PI 276017	Non-free-threshing	4	Spain, Asturias	NA	NA	NA	NA	C	G/A	T	T	T/G	C	A	T	C	C	G	C	G	G	G	G	G
Triticum aestivum ssp. spelta	Hexaploid	Spelt	PI 348303	Non-free-threshing	4	Belgium, Région wallonne	NA	NA	NA	NA	C	G/A	T	T	T/G	C	A	T	C	C	G	C	G	G	G	G	G
Triticum aestivum ssp. spelta	Hexaploid	Spelt	PI 221419	Non-free-threshing	4	Serbia	NA	NA	NA	NA	C	G/A	T	T	T/G	C	A	T	C	C	G	C	G	G	G	G	G
Triticum aestivum ssp. macha	Hexaploid	Macha	PI 428146	Non-free-threshing	4	Sweden, Uppsala län	NA	NA	NA	NA	C	G/A	T	T	T/G	C	A	T	C	C	G	C	G	G	G	G	G
Triticum aestivum ssp. aestivum	Hexaploid	Cultivar	105573	Free-threshing	4	Former Soviet Union	NA	NA	NA	NA	C	G/A	T	T	T/G	C	A	T	C	C	G	C	G	G	G	G	G
Triticum aestivum ssp. aestivum	Hexaploid	Landrace	131945	Free-threshing	4	Former Soviet Union	NA	NA	NA	NA	C	G/A	T	T	T/G	C	A	T	C	C	G	C	G	G	G	G	G
Triticum aestivum ssp. aestivum	Hexaploid	Unknown	PI 384347	Free-threshing	4	Nigeria, Borno	NA	NA	NA	NA	C	G/A	T	T	T/G	C	A	T	C	C	G	C	G	G	G	G	G
Triticum aestivum ssp. aestivum	Hexaploid	Landrace	PI 73361	Free-threshing	4	Azerbaijan	NA	NA	NA	NA	C	G/A	T	T	T/G	C	A	T	C	C	G	C	G	G	G	G	G
Triticum aestivum ssp. aestivum	Hexaploid	Landrace	PI 178184	Free-threshing	4	Turkey, Van	NA	NA	NA	NA	C	G/A	T	T	T/G	C	A	T	C	C	G	C	G	G	G	G	G
Triticum aestivum ssp. aestivum	Hexaploid	Landrace	131418	Free-threshing	4	Afghanistan	NA	NA	NA	NA	C	G/A	T	T	T/G	C	A	T	C	C	G	C	G	G	G	G	G
Triticum aestivum ssp. aestivum	Hexaploid	Landrace	131941	Free-threshing	4	Former Soviet Union	NA	NA	NA	NA	C	G/A	T	T	T/G	C	A	T	C	C	G	C	G	G	G	G	G
Triticum aestivum ssp. aestivum	Hexaploid	Landrace	132175	Free-threshing	4	Afghanistan	NA	NA	NA	NA	C	G/A	T	T	T/G	C	A	T	C	C	G	C	G	G	G	G	G
Triticum aestivum ssp. aestivum	Hexaploid	Cultivar	101164	Free-threshing	4	Australia	NA	NA	NA	NA	C	G/A	T	T	T/G	C	A	T	C	C	G	C	G	G	G	G	G
Triticum aestivum ssp. aestivum	Hexaploid	Landrace	PI 94567	Free-threshing	4	Israel	NA	NA	NA	NA	C	A	T	T	G	C	A	T	C	C	G	C	G	G	G	G	G
Triticum aestivum ssp. aestivum	Hexaploid	Landrace	Chinese Spring (Reference)	Free-threshing	5	China, Sichuan	C	T	C	TT	C	G	T	T	T	C	A	T	C	C	G	C	G	G	G	G	G
