# Supplementary material
Source: Research Square preprint supplement (doi:10.21203/rs.3.rs-9315249/v1)
Supplement: Supplementary file 5 [file 69fa021cd92b6f73cf4daca6.xlsx]

## Sheet: Data
Supplementary Data 1. Graphical genotypes of 95 F2:3 families. The genotypes of CS x DS2D2 F2 plants (desingated by "GH" followed by a five-digit number) are in columns. The marker genotypes were determined by genotying F2 plants: A stands for homozygosity for the wheat allele, B stands for homozygosity for the Ae. tauschii allele, and H stands for heterozygosity. Tg-D1 genotypes were inferred fr…
Locus	Aet v4.0 pseudomolecule 2D coordinates (bp)	GH26585	GH26591	GH26621	GH26679	GH26695	GH27806	GH26507	GH26526	GH26601	GH26721	GH26733	GH36605	GH37408	GH37873	GH27652	GH37082	GH36736	GH37049	GH37548	GH26756	GH26684	GH27093	GH36885	GH37429	GH36782	GH26499	GH27165	GH26565	GH26701	GH26814	GH26448	GH26450	GH26451	GH26545	GH26659	GH38223	GH37629	GH38018	GH26767	GH37449	GH26806	GH37226	GH37501	GH36961	GH26637	GH26650	GH26789	GH27257
XBF201235	18896992	H	H	H	H	H	H	H	H	H	H	H	H	H	H	H	H	H	H	H	H	H	H	H	H	H	H	H	H	H	H	B	B	B	B	B	B	B	B	B	B	B	B	B	B	B	B	B	B
AET2Gv20087700	20381032							H	H		H		H	H	H	H	H	H	H	H	H		H	H	H	H	H		H		H		B	B	B		B	B	B	B	B	B	B	B	B			B	B
AET2Gv20102000	23467106	H	H	H	H	H	H	H	H	H	H	H	H	H	H	H	H	H	H	H	H	H	H	H	H	H	H	H	H	H	H	B	B	B	B	B	B	B	B	B	B	B	B	B	B	B	B	B	B
Xwmc112	24288295	H	H	H	H	H	H	H	H	H	H	H	H	H	H	H	H	H	H	H	H	H	H	H	H	H	H	H	B	B	B	B	B	B	B	B	B	B	B	B	B	B	B	B	B	H	H	H	H
AET2Gv20109300	24662124													H	H	H	H	H	H	H	H	H	H	H	H											B		B	B	B	B	B			H
AET2Gv20109100	24648024				H									H	H	H	H	H			H	H	H	H	H												B	B	B	B	B	B			H
AET2Gv20108700	24570888	H	H					H	H	H			H	H	H		H	H	H	H	H	H	H	H	H	B	B	B	B			B	B	B	B		B	B	B	B	B	H	H	H					H
AET2Gv20108800	24564116	H	H					H	H	H				H				H	H	H	H	H	H	H	B		B	B	B			B	B	B	B			B	B	B	H								H
AET2Gv20108000	24502469						H						H	H	H	B	B	B	B	B	B	B	B	B	B			B										H	H	H	H	H	H
AET2Gv20109500	24922645	H	H	H	H	H	H	H	H		H		H	B	B	B	B	B	B	B	B	B	B	B	B	B	B	B	B	B	B	B	B	B	B	B	B	H	H	H	H	H	H	H	H	H	H		H
Tg-D1		H	H	H	H	H	H	H	H	H	H	H	H	B	B	B	B	B	B	B	B	B	B	B	B	B	B	B	B	B	B	B	B	B	B	B	B	H	H	H	H	H	H	H	H	H	H	H	H
Aet_25293813	25293813	H	H	H	H	H	H	H	H	H	H	H	H	B	B	B	B	B	B	B	B	B	B	B	B	B	B	B	B	B	B	B	B	B	B	B	B	H	H	H	H	H	H	H	H	H	H	H	H
AET2Gv20110400	25550602													B	B		B								B											B	H	H	H
AET2Gv20110900	25678543	H	H	H	H			H	H	H	H	H	H	B	B	B	B	B	B	B	B	B	B		B	B	B	B	B	B	B	B	B	B	B	H	H		H	H	H	H	H	H	H	H	H		H
AET2Gv20111700	25876465	H	H	H	H		B	B	B	B	B	B	B	B	B	B	B	B	B	B	B	B	B	B	B	B	B	B	B	B	B		B	B		H	H	H	H	H	H	H		H	H	H	H	H	H
AET2Gv20111900	25912817	H	H	H	H	H		B	B	B	B		B	B	B	B	B	B	B	B	B	B	B	B	B	B	B	B	B	B	B	B	B	B	H	H		H	H	H	H	H	H	H	H	H	H	H	H
AET2Gv20112100	25942127	H	H	H	H			B	B	B	B		B	B	B	B	B	B	B	B	B	B	B	B	B	B	B	B	B	B	B	B	B	B	H	H		H	H		H	H	H	H	H	H	H	H	H
AET2Gv20112900	26032834			H	H	H	B				B	B	B	B	B	B	B	B	B	B	B	B		B	B	B			B	B	B					H	H	H	H	H	H	H	H	H		H	H	H
XCA658378	29081684	B	B	B	B	B	B	B	B	B	B	B	B	B	B	B	B	B	B	B	B	B	B	B	B	B	B	B	B	B	B	H	H	H	H	A	H	H	H	H	H	H	H	H	H	H	H	H	H
XBE488719	30190368	B	B	B	B	B	B	B	B	B	B	B	B	B	B	B	B	B	B	B	B	B	B	B	B	B	B	B	B	B	B	H	H	H	H	A	H	H	H	H	H	H	H	H	H	H	H	H	H
Mean glume tenancity		3.45833	2.15	3.08333	2.5122	2.64516	2.63333	2.58333	2.72727	2.44	2.69565	2.03704	2.95652	1.4898	1.96552	1.64032	1.08889	1.11224	1.34535	1.12108	1.44369	1.41667	1.01411	1.27136	1.5	1.03448	1.08571	1.59333	1.74286	1.16	1.08	1.77778	1.5	2.19231	1.14773	1.92833	1.43165	2.14286	3.75	2.28	3.19231	3.03846	3	2.2	2.63636	2.57895	3.03333	1.96154	2.96296
Standard deviation		1.25036	1.08942	1.17646	1.45124	1.49551	1.3257	1.10007	1.35161	1.12101	1.39593	1.22416	1.36443	0.775112	0.905647	1.19058	0.301437	0.330732	0.6166	0.325008	0.608604	0.775532	0.0733143	0.448036	0.693889	0.185695	0.284029	0.81377	0.81684	0.553775	0.4	1.01274	0.860233	0.980581	0.549924	0.931458	0.784509	1.29713	1.23603	1.27541	1.29674	1.45549	1.43925	1.42393	1.43246	1.34643	1.58622	1.50946	1.01835
[truncated: 47 more columns]
