# Supplementary material
Source: Research Square preprint supplement (doi:10.21203/rs.3.rs-9315249/v1)
Supplement: Supplementary file 6 [file 6c6ee62c92108f147aa7a0cc.xlsx]

## Sheet: Sheet1
Supplementary Data 5. Mean spike length and shape, mean spikelet fertility, and mean spike threshability (averages of 3 spikes) and plant height and heading date (single plants) of 185 T1 plants. Note that seeds from T0 spikes were harvested separately. Significance of differences between CS and DS2D5 was computed with t-test.
Sequential order	Plant name	T0 Plant	Spike	Pedigree	Cas9 and gRNA detected	Spike shape	Mean spike length (cm)	Mean height (cm)	Mean fertility (mean number of seeds per spikelet)	Days to anthesis (no. of days)	Threshanility (no. of seeds libarated by threshing/total no. of seeds)
1	GH67182	246104-001	#1	(246104-001 sp# 1 or 2)-1	Yes	Speltoid	7.66667	90.3333	1.74231	89	0
2	GH67183	246104-001	#1	(246104-001 sp# 1 or 2)-2	Yes	Square, short awns	8.16667	92.6667	2.18968	84	1
3	GH67184	246104-001	#1	(246104-001 sp# 1 or 2)-3	Yes	Club	6.16667	82.3333	2.17778	81	0.711111
4	GH67185	246104-001	#1	(246104-001 sp# 1 or 2)-4	Yes	Rectangural	5.83333	77	1.925	93	0.87037
5	GH67186	246104-001	#1	(246104-001 sp# 1 or 2)-5	Yes	Club	5.83333	92.3333	2.39103	88	0.989583
6	GH67190	246104-001	#1	(246104-001 sp# 1 or 2)-9	Yes	Compactoid	4.66667	46.3333	0.285714	71	1
7	GH67192	246104-002	#3	(246104-002 sp#3)-1	Yes	Speltoid	9.33333	111.333	3.60635	84	0.0125786
8	GH67193	246104-002	#3	(246104-002 sp#3)-2	Yes	Speltoid	8.83333	103.333	3.05385	76	0.00775194
9	GH67194	246104-002	#3	(246104-002 sp#3)-3	Yes	Speltoid	7.5	98.6667	2.5083	76	0.0577778
10	GH67195	246104-002	#3	(246104-002 sp#3)-4	Yes	Speltoid	7.73333	99.3333	3.45543	79	0.280342
11	GH67196	246104-002	#3	(246104-002 sp#3)-5	No	Speltoid	8.26667	94	2.6723	74	0.116382
12	GH67197	246104-002	#3	(246104-002 sp#3)-6	No	Speltoid	8.16667	89.3333	2.38492	80	0.35908
13	GH67198	246104-002	#3	(246104-002 sp#3)-7	No	Speltoid	9.23333	89.6667	2.88345	83	0.242186
14	GH67199	246104-002	#3	(246104-002 sp#3)-8	No	Speltoid	6.36667	71.6667	2.99817	75	0.388464
15	GH67200	246104-002	#3	(246104-002 sp#3)-9	No	Speltoid	9.66667	108	3.28056	86	0.0379867
16	GH67201	246104-002	#3	(246104-002 sp#3)-10	No	Speltoid	9.5	95	3.27774	74	0.0513019
17	GH67202	246104-005	#2	(246104-005 sp#2)-1	Yes	Speltoid	9.1	90.3333	1.11905	81	0.44289
18	GH67203	246104-005	#2	(246104-005 sp#2)-2	Yes	Speltoid	7	88.6667	2.33098	76	0.956522
19	GH67204	246104-005	#2	(246104-005 sp#2)-3	Yes	Rectangural	7.4	101.333	2.11795	80	1
20	GH67205	246104-005	#2	(246104-005 sp#2)-4	Yes	Speltoid	9	98.6667	2.51876	88	0.0166667
21	GH67206	246104-005	#2	(246104-005 sp#2)-5	Yes	Rectangural	7.06667	80.3333	2.57273	78	1
22	GH67207	246104-005	#2	(246104-005 sp#2)-6	No	Club	7.33333	66.3333	2.26923	73	0.966667
23	GH67208	246104-005	#2	(246104-005 sp#2)-7	No	Club	6.5	71.3333	0.476263	79	1
24	GH67209	246104-005	#2	(246104-005 sp#2)-8	Yes	Speltoid	7.66667	80	2.32035	74	0.025
25	GH67211	246105-002	#1	(246105-002 sp#1)-2	Yes	Speltoid	7.66667	85	2.29915	75	0.0913554
26	GH67212	246105-002	#1	(246105-002 sp#1)-3	Yes	Speltoid	8.33333	105.667	2.60256	76	0.258081
27	GH67213	246105-002	#1	(246105-002 sp#1)-4	Yes	Speltoid	8.33333	108.667	2.94697	76	0.279114
28	GH67214	246105-002	#1	(246105-002 sp#1)-5	Yes	Speltoid	8.3	109.667	2.87179	76	0.100926
29	GH67215	246105-002	#1	(246105-002 sp#1)-6	Yes	Speltoid	8	96.3333	2.83175	73	0.0338114
30	GH67216	246105-002	#1	(246105-002 sp#1)-7	Yes	Speltoid	8.46667	88.6667	2.56296	74	0.0274904
31	GH67217	246105-002	#1	(246105-002 sp#1)-8	Yes	Speltoid	9.36667	109.667	3.0303	78	0.176035
32	GH67218	246105-002	#1	(246105-002 sp#1)-9	Yes	Speltoid	8.66667	93.3333	2.76996	77	0.19718
33	GH67219	246105-002	#1	(246105-002 sp#1)-10	Yes	Speltoid	8.66667	107.333	2.37729	77	0.168347
34	GH67220	246105-002	#2	(246105-002 sp#2)-1	Yes	Speltoid	8.66667	95.3333	2.73846	74	0.294872
35	GH67221	246105-002	#2	(246105-002 sp#2)-2	No	Speltoid	9.33333	109.333	3.36081	80	0.0374852
36	GH67222	246105-002	#2	(246105-002 sp#2)-3	No	Speltoid	7.46667	96.3333	3.31779	76	0.248868
37	GH67223	246105-002	#2	(246105-002 sp#2)-4	No	Speltoid	8.33333	84.3333	3	76	0.110227
38	GH67224	246105-002	#2	(246105-002 sp#2)-5	No	Speltoid	7.93333	91.6667	2.92857	81	0.0727513
39	GH67225	246105-002	#2	(246105-002 sp#2)-6	Yes	Speltoid	8.56667	90.3333	2.51575	81	0.0947421
40	GH67226	246105-002	#2	(246105-002 sp#2)-7	No	Speltoid	8.33333	88.6667	2.23504	74	0.0424242
41	GH67227	246105-002	#2	(246105-002 sp#2)-8	No	Speltoid	8.43333	114.667	2.97436	78	0.112037
42	GH67228	246105-002	#2	(246105-002 sp#2)-9	No	Speltoid	8.83333	103.333	2.94829	73	0.13283
43	GH67229	246105-002	#2	(246105-002 sp#2)-10	No	Speltoid	7.5	117	2.97436	73	0.289815
44	GH67232	246105-002	#3	(246105-002 sp#3)-1	Yes	Compactoid	5	82.6667	1.29304	76	1
45	GH67235	246105-002	#3	(246105-002 sp#3)-4	Yes	Speltoid	8.83333	81.3333	2.31682	69	0.0266667
46	GH67237	246105-002	#3	(246105-002 sp#3)-6	Yes	Speltoid	7.1	112.667	0.954167	74	0.209617
47	GH67238	246105-002	#3	(246105-002 sp#3)-7	Yes	Rectangural	6	83.6667	0.296703	80	1
48	GH67239	246105-002	#3	(246105-002 sp#3)-8	Yes	Speltoid	6.53333	100.667	2.27289	73	0.438871
49	GH67241	246105-002	#3	(246105-002 sp#3)-10	?	Speltoid	7.2	92.3333	2.62706	71	0.267124
50	GH67242	246105-003	#2	(246105-002 20#2)-1	Yes	Speltoid	7.83333	100.667	2.43333	82	0.110343
51	GH67243	246105-003	#2	(246105-002 20#2)-2	Yes	Speltoid	8.5	93.6667	3.14286	81	0.0461593
52	GH67244	246105-003	#2	(246105-002 20#2)-3	Yes	Speltoid	7.33333	90	1.4494	85	0.297619
53	GH67245	246105-003	#2	(246105-002 20#2)-4	Yes	Speltoid	9	80	3.15385	82	0.0135135
54	GH67246	246105-003	#2	(246105-002 20#2)-5	Yes	Speltoid	8.16667	98	2.65593	78	0.0690508
55	GH67247	246105-003	#2	(246105-002 20#2)-6	Yes	Speltoid	7.83333	104	2.66667	84	0.342044
56	GH67248	246105-003	#2	(246105-002 20#2)-7	Yes	Speltoid	8.5	92.3333	2.89444	80	0.017094
57	GH67249	246105-003	#2	(246105-002 20#2)-8	Yes	Speltoid	7.83333	102.333	2.59524	82	0.018648
58	GH67250	246105-003	#2	(246105-002 20#2)-9	Yes	Speltoid	8.83333	107	2.6958	80	0.195281
59	GH67251	246105-003	#2	(246105-002 20#2)-10	Yes	Speltoid	9.16667	104.667	3.21116	86	0.0297463
60	GH67253	246105-005	#1	(246105-005 rest 1sp)-2	Yes	Speltoid, short	6.83333	58.6667	1.85185	77	0.561111
61	GH67254	246105-005	#1	(246105-005 rest 1sp)-3	Yes	Speltoid, short	6.83333	58.6667	1.91204	59	0.733333
62	GH67255	246105-005	#1	(246105-005 rest 1sp)-4	Yes	Speltoid, short	6.33333	68.3333	2.45767	62	0.443939
63	GH67257	246105-005	#2	(246105-005 sp#?)-2	Yes	Club, short	6.83333	65.3333	1.40051	57	0.102564
64	GH67259	246105-005	#2	(246105-005 sp#?)-4	Yes	Speltoid, short	7.25	57.6667	1.39881	59	0.0384615
65	GH67260	246105-005	#2	(246105-005 sp#?)-5	Yes	Club, short	5.16667	34.3333	0.55	59	1
66	GH67261	246105-005	#2	(246105-005 sp#?)-6	Yes	Speltoid	8.5	69.6667	2.61111	67	0.0897207
67	GH67265	246105-009	#1	(246105-009 rest)-1	No	Speltoid	9.33333	92	3.68162	72	0.0749055
68	GH67266	246105-009	#1	(246105-009 rest)-2	Yes	Speltoid	8.93333	100.333	3.05	75	0.0710956
69	GH67267	246105-009	#1	(246105-009 rest)-3	Yes	Speltoid	8.33333	93.3333	2.45861	71	0.282546
70	GH67268	246105-009	#1	(246105-009 rest)-4	Yes	Speltoid	7.16667	80	0.30303	85	0.177778
71	GH67269	246105-009	#1	(246105-009 rest)-5	Yes	Club	8.33333	99.3333	3.78358	69	0.0456309
72	GH67271	246105-009	#1	(246105-009 rest)-7	Yes	Speltoid	9.33333	80	2.05586	73	0.037037
73	GH67273	246105-009	#1	(246105-009 rest)-9	Yes	Speltoid	7	85.6667	0.0871212	72	0
74	GH67275	246105-009	#1	(246105-009 rest)-11	Yes	Speltoid	8.5	110	2.89621	83	0.333047
75	GH67276	246106-011	#1	(246106-011 sp#1)-1	Yes	Speltoid	7.83333	108	3.42308	82	0.048908
76	GH67277	246106-011	#1	(246106-011 sp#1)-2	Yes	Speltoid	7.5	113.333	1.85714	90	0.0384615
77	GH67278	246106-011	#1	(246106-011 sp#1)-3	Yes	Speltoid	9.33333	102.333	3.21111	79	0.0683761
78	GH67279	246106-011	#1	(246106-011 sp#1)-4	Yes	Speltoid	7.66667	86.3333	2.47037	80	0.202899
79	GH67281	246106-011	#1	(246106-011 sp#1)-6	Yes	Speltoid	7.16667	74	1.96667	87	0.143583
80	GH67282	246106-011	#1	(246106-011 sp#1)-7	Yes	Speltoid	7.83333	110.333	3.46825	77	0.164185
81	GH67283	246106-011	#1	(246106-011 sp#1)-8	Yes	Speltoid	9	107.667	2.87338	75	0.0227273
82	GH67284	246107-002	#2	(246107-002 sp#2)-1	Yes	Speltoid	9	90	3.07143	73	0.0232558
83	GH67285	246107-002	#2	(246107-002 sp#2)-2	Yes	Speltoid	9	80	3.25	66	0.025641
84	GH67286	246107-002	#2	(246107-002 sp#2)-3	Yes	Speltoid	8	95.3333	2.01921	67	0.148999
85	GH67287	246107-002	#2	(246107-002 sp#2)-4	Yes	Speltoid, short awns	8.5	90.3333	2.60556	68	0.130682
86	GH67288	246107-002	#2	(246107-002 sp#2)-5	Yes	Speltoid	8.83333	87.3333	2.91582	68	0.117406
87	GH67289	246107-002	#2	(246107-002 sp#2)-6	Yes	Speltoid, short awns	7	70.3333	1.95278	73	0.255768
88	GH67291	246107-002	#2	(246107-002 sp#2)-8	Yes	Speltoid	7.33333	75.6667	1.42827	63	0.29264
89	GH67292	246107-003	#3	(246107-003 sp#3)-1	Yes	Club	6.66667	91	3.02393	75	1
90	GH67293	246107-003	#3	(246107-003 sp#3)-2	Yes	Club	7.66667	76.6667	3.17857	64	0.312492
91	GH67294	246107-003	#3	(246107-003 sp#3)-3	Yes	Club	7	105	2.58608	63	0.953925
92	GH67295	246107-003	#3	(246107-003 sp#3)-4	Yes	Compactoid	6.16667	100.667	2.5655	86	1
93	GH67297	246107-003	#2	(246107-003 sp#2)-1	Yes	Compactoid	6.33333	86	2.36409	80	1
94	GH67298	246107-003	#2	(246107-003 sp#2)-2	Yes	Rectangural	6.5	80	2.29487	85	0.989247
95	GH67299	246107-003	#2	(246107-003 sp#2)-3	Yes	Rectangural	7	77.3333	2.65385	77	0.95873
96	GH67300	246107-003	#2	(246107-003 sp#2)-4	Yes	Rectangural	5.66667	96	2.24848	80	1
97	GH67301	246107-003	#2	(246107-003 sp#2)-5	Yes	Compactoid	6.26667	80	2.11111	81	0.712644
98	GH67302	246107-003	#1	(246107-003 sp#1)-1	Yes	Rectangural	7.16667	70.6667	2.01375	85	1
99	GH67303	246107-003	#1	(246107-003 sp#1)-2	Yes	Compactoid	6.4	97.3333	1.90152	80	0.975309
100	GH67304	246107-003	#1	(246107-003 sp#1)-3	Yes	Rectangural	7.33333	103.333	2.68376	80	1
101	GH67305	246107-003	#1	(246107-003 sp#1)-4	Yes	Rectangural	7.56667	93	2.64921	83	0.619052
102	GH67306	246107-003	#1	(246107-003 sp#1)-5	Yes	Speltoid	8	80.5	1.80299	87	0.797516
103	GH67307	246107-003	#1	(246107-003 sp#1)-6	Yes	Compactoid	6.33333	80	2.34066	75	1
104	GH67308	246107-003	#1	(246107-003 sp#1)-7	Yes	Compactoid	6.83333	95.3333	2.79017	80	1
105	GH67309	246107-003	#1	(246107-003 sp#1)-8	Yes	Compactoid	6.33333	106	2.69343	85	0.990476
106	GH67310	246107-003	#1	(246107-003 sp#1)-9	Yes	Rectangural	7.33333	80.6667	1.87205	85	1
107	GH67311	246107-003	#1	(246107-003 sp#1)-10	Yes	Speltoid	7.5	76	2.49451	80	0.894737
108	GH67312	246107-005	#1	(246107-005 sp#1or3)-1	Yes	Speltoid, short awns	7.66667	72.6667	1.17778	57	0.138889
109	GH67314	246107-005	#2	(246107-005 sp #2)-1	Yes	Speltoid	9	81.6667	1.45791	59	0.904762
110	GH67315	246107-005	#3	(246107-005 sp#?)-1	Yes	Compactoid	5.66667	64	1.72222	52	0.933333
111	GH67316	246107-016	#3	(246107-016 sp#3)-1	Yes	Compactoid	6.76667	93	2.86797	74	1
112	GH67317	246107-016	#3	(246107-016 sp#3)-2	Yes	Compactoid	5.66667	87.6667	1.68473	85	1
113	GH67318	246107-016	#3	(246107-016 sp#3)-3	Yes	speltoid, short	6.16667	77.3333	1.5	72	1
114	GH67319	246107-016	#3	(246107-016 sp#3)-4	Yes	Compactoid	6.16667	76.6667	2.42121	85	1
115	GH67320	246107-016	#3	(246107-016 sp#3)-5	Yes	Compactoid	4.66667	88	1.42222	88	1
116	GH67321	246107-016	#3	(246107-016 sp#3)-6	Yes	Compactoid	5.83333	79.3333	0.117949	80	1
117	GH67322	246107-016	#3	(246107-016 sp#3)-7	Yes	Rectangural	7.16667	77	2.94444	78	1
118	GH67323	246107-016	#3	(246107-016 sp#3)-8	Yes	Compactoid	6.66667	89.3333	2.96465	78	1
119	GH67324	246107-016	#3	(246107-016 sp#3)-9	Yes	Compactoid, short awns	5.43333	110.667	1.57692	78	1
120	GH67325	246107-016	#3	(246107-016 sp#3)-10	Yes	Club	6.83333	80.6667	3.01213	76	0.819024
121	GH67326	246107-016	#1	(246107-016 sp#1)-1	Yes	Rectangural	6.83333	66	2.05628	87	1
122	GH67327	246107-016	#1	(246107-016 sp#1)-2	Yes	Speltoid	8.43333	98	2.663	90	0.866925
123	GH67328	246107-016	#1	(246107-016 sp#1)-3	Yes	Speltoid	6.16667	99.6667	2.86111	96	0.664599
124	GH67329	246107-016	#1	(246107-016 sp#1)-4	Yes	Rectangural	6.76667	84.3333	2.81061	72	1
125	GH67330	246107-016	#1	(246107-016 sp#1)-5	Yes	Compactoid	6.83333	80	2.93131	70	0.954789
126	GH67331	246107-016	#1	(246107-016 sp#1)-6	Yes	Rectangural	4	100.667	2.94957	95	0.942029
127	GH67332	246107-016	#1	(246107-016 sp#1)-7	Yes	Speltoid	6	48	0	81	#VALUE!
128	GH67333	246107-016	#1	(246107-016 sp#1)-8	Yes	Rectangural	7.33333	88.3333	2.125	76	1
129	GH67334	246107-016	#1	(246107-016 sp#1)-9	Yes	Compactoid, short awns	6.5	71.6667	2.02991	83	1
130	GH67335	246107-016	#1	(246107-016 sp#1)-10	Yes	Rectangural	8	80.6667	2.80983	82	0.832997
131	GH67336	246107-017	#3	(246107-017 rest)-1	Yes	Rectangural	6.1	79	2.20696	82	0.952381
132	GH67337	246107-017	#3	(246107-017 rest)-2	Yes	Compactoid	6	75.3333	1.90476	87	0.799114
133	GH67338	246107-018	#3	(246107-017 rest)-3	Yes	Speltoid	7.76667	100	2.75	88	0
134	GH67339	246107-019	#3	(246107-017 rest)-4	Yes	Compactoid, short awns	6.83333	72.3333	1.2359	104	0
135	GH67344	246107-020	#3	(246107-017 rest)-9	Yes	Rectangural	5.8	64.3333	2.42172	76	1
136	GH67347	246107-018	#1	246107-018 sp#1 or 2)-3	Yes	Rectangural	7.33	71.6667	1.36	70	1
137	GH67348	246107-018	#1	246107-018 sp#1 or 2)-4	Yes	Speltoid	7.83333	75.3333	1.26154	74	0.122316
138	GH67349	246107-018	#1	246107-018 sp#1 or 2)-5	Yes	Speltoid	8.66667	84.3333	2.19585	75	0.0440031
139	GH67350	246107-018	#3	246107-018 sp#3)-1	Yes	Speltoid	8.16667	84.6667	2.45079	78	0.0648067
140	GH67351	246107-018	#3	246107-018 sp#3)-2	Yes	Rectangural	6.33333	88.6667	2.5016	81	1
141	GH67352	246107-018	#3	246107-018 sp#3)-3	Yes	Speltoid, strong	9.83333	87.3333	2.36364	62	0.197547
142	GH67355	246107-018	#3	246107-018 sp#3)-6	Yes	Speltoid	7.16667	100	2.85714	82	0.119658
143	GH67357	246107-018	#3	246107-018 sp#3)-8	Yes	Speltoid, strong	10.3333	96.3333	3.5254	73	0.0323836
144	GH67358	246107-018	#3	246107-018 sp#3)-9	Yes	Club	6.5	73.6667	2.21429	84	1
145	GH67359	246107-018	#3	246107-018 sp#3)-10	Yes	Compactoid	5.33333	57.3333	1.55268	93	1
146	GH67360	246107-018	#2	246107-018 sp#1or2?)-1	Yes	Speltoid	7.66667	105	3.28288	92	0.299228
147	GH67361	246107-018	#2	246107-018 sp#1or2?)-2	Yes	Speltoid	9.33333	66.6667	2.82906	77	0.116849
148	GH67365	246107-018	#2	246107-018 sp#1or2?)-6	Yes	Speltoid	7.33333	99.3333	2.89103	97	0.0805556
149	GH67366	246107-018	#2	246107-018 sp#1or2?)-7	Yes	Speltoid	8	103	3.04922	82	0.156289
150	GH67367	246107-018	#2	246107-018 sp#1or2?)-8	Yes	Compactoid	5.5	98.3333	2.23333	88	1
151	GH67368	246107-018	#2	246107-018 sp#1or2?)-9	Yes	Rectangural	7.16667	93.3333	2.62698	75	1
152	GH67369	246108-012	#3	(246108-012 sp#3)-1	Yes	Speltoid	7.33333	112.667	3.11953	72	0.862519
153	GH67370	246108-012	#3	(246108-012 sp#3)-2	Yes	Speltoid	8.16667	113	3.22222	79	0.164842
154	GH67371	246108-012	#3	(246108-012 sp#3)-3	Yes	Compactoid	5.83333	85.3333	1.39927	76	1
155	GH67372	246108-012	#3	(246108-012 sp#3)-4	Yes	Speltoid	7.33333	103	2.71645	73	0.908696
156	GH67373	246108-012	#3	(246108-012 sp#3)-5	Yes	Speltoid	9	108.333	3.01471	67	0.17767
157	GH67374	246108-012	#3	(246108-012 sp#3)-6	Yes	Speltoid	6.83333	112	2.40359	85	0.207973
158	GH67375	246108-012	#3	(246108-012 sp#3)-7	Yes	Rectangural	6.16667	110.667	2.85859	73	1
159	GH67377	246108-012	#3	(246108-012 sp#3)-9	Yes	Speltoid	7.66667	113.333	2.64866	76	0.93525
160	GH67378	246108-012	#3	(246108-012 sp#3)-10	Yes	Rectangural	6.66667	106.667	3.21276	73	0.93525
161	GH67379	246105-006	#2	(246105-006 sp#2)-1	Yes	Rectangural	6.66667	92.3333	1.97436	77	1
162	GH67380	246105-006	#2	(246105-006 sp#2)-2	Yes	Rectangural	7.5	93.6667	2.88645	76	1
163	GH67381	246105-006	#2	(246105-006 sp#2)-3	Yes	Rectangural	7.16667	94	3.08983	79	0.986111
164	GH67382	246105-006	#2	(246105-006 sp#2)-4	Yes	Club	6.33333	85	2.87005	72	0.981481
165	GH67383	246105-006	#2	(246105-006 sp#2)-5	Yes	Compactoid	6.5	87.6667	1.96503	84	1
166	GH67384	246105-006	#2	(246105-006 sp#2)-6	Yes	Compactoid	5.25	67	1.13333	67	1
167	GH67385	246105-006	#2	(246105-006 sp#2)-7	Yes	Rectangural	6.93333	95.6667	2.93519	81	0.988889
168	GH67386	246105-006	#2	(246105-006 sp#2)-8	Yes	Rectangural	6.76667	90	2.77778	76	1
169	GH67387	246105-006	#2	(246105-006 sp#2)-9	Yes	Compactoid	5.16667	71.3333	1.67222	72	1
170	GH67388	246105-006	#2	(246105-006 sp#2)-10	Yes	Compactoid	5.16667	76	1.47222	78	1
171	GH67389	246105-007	#1	(246105-007 sp#1)-1	Yes	Club	7.85	58.8333	2.58333	92	0.0645161
172	GH67390	246105-007	#1	(246105-007 sp#1)-2	Yes	Rectangural, short	6.6	84.3333	0.683761	91	0.113636
173	GH67391	246105-007	#1	(246105-007 sp#1)-3	Yes	Speltoid	8.93333	87.3333	2.77778	73	1
174	GH67392	246105-007	#1	(246105-007 sp#1)-4	Yes	Speltoid	8.83333	91.6667	2.50816	72	0.200711
175	GH67393	246105-007	#1	(246105-007 sp#1)-5	Yes	Rectangural	7.5	95.3333	3.00556	72	0.740446
176	GH67394	246105-007	#1	(246105-007 sp#1)-6	Yes	Club	7.33333	82	0.396825	78	0
177	GH67395	246105-007	#1	(246105-007 sp#1)-7	Yes	Speltoid	7.83333	73.6667	1.70066	74	0.284483
178	GH67396	246105-007	#1	(246105-007 sp#1)-8	Yes	Speltoid	8.4	94	1.15	74	0.404762
179	GH67397	246105-007	#1	(246105-007 sp#1)-9	Yes	Speltoid	8.26667	69.6667	1.54145	81	0.0371517
180	GH67398	246105-007	#1	(246105-007 sp#1)-10	Yes	Rectangural	7.83333	108	2.80556	85	0.450233
181	GH67400	246105-007	#2	(246105-007 sp#2 or 3)-2	Yes	Speltoid	9.43333	97	3.30556	76	0.166493
182	GH67402	246105-007	#2	(246105-007 sp#2 or 3)-4	Yes	Speltoid, short	7	60	0.938889	90	0
183	GH67405	246105-008	#1	(246105-008 sp1or3)-1	Yes	Speltoid, short	7.16667	93.6667	3.25152	90	0.350877
184	GH67406	246105-008	#1	(246105-008 sp1or3)-2	Yes	Speltoid, short	8.13333	106	0.727273	63	1
185	GH67407	246105-008	#1	(246105-008 sp1or3)-3	Yes	Speltoid, short	8	77.3333	2.43434	59	0.687605
186	GH67410			CS	No	Rectangural	7	111.333	2.57667	79	1
187	GH67411			CS	No	Rectangural	7	107.667	2.37879	62	1
188	GH67412			CS	No	Rectangural	7	94.6667	2.84615	76	1
189	GH67413			CS	No	Rectangural	7	103.333	2.33675	73	0.962963
190	GH67414			CS	No	Rectangural	5.5	113.333	2.22502	78	1
191	GH67415			CS	No	Rectangural	6.5	105.667	2.60433	77	1
192	GH67416			CS	No	Rectangural	8	113.667	2.39394	79	1
193	GH67417			CS	No	Rectangural	8	112.667	2.33303	81	1
194	GH67418			CS	No	Rectangural	8	119	2.82894	77	1
195	GH67419			CS	No	Rectangural	7	116	2.61349	77	1
196	Mean			CS			7.1	109.733	2.51371	75.9	0.996296
197	GH67422			DS 2D_5405_DV1186	No	Speltoid	8	90.3333	2.49476	80	0.243106
198	GH67424			DS 2D_5405_DV1186	No	Speltoid	8	104.333	2.32906	81	0.262906
199	GH67425			DS 2D_5405_DV1186	No	Speltoid	7.5	108.667	2.35635	81	0.376392
200	GH67426			DS 2D_5405_DV1186	No	Speltoid	7.5	105.333	3.23889	80	0.490154
201	GH67427			DS 2D_5405_DV1186	No	Speltoid	8.2	103.667	2.01984	80	0.537485
202	GH67428			DS 2D_5405_DV1186	No	Speltoid	9	98	2.19811	81	0.353449
203	Mean			DS 2D_5405_DV1186			8.03**	101.72*	2.43n.s.	80.50*	0.377***
