# Supplementary material
Source: Research Square preprint supplement (doi:10.21203/rs.3.rs-9315249/v1)
Supplement: Supplementary file 7 [file 6cd6656d998b9fe4f37be31c.xlsx]

## Sheet: Data
Supplementary Data 6. FPKM of differentially expressed genes (DEGs) in three families of free-threshing CRISPR/Cas9 mutants, Chinese Spring (CS), disomic substitutions (DS) of Ae. tauschii chromosome 2D in CS (DS2D2, DS2D3, and DS2D5). RNA reads were mapped to CS genomic sequences IWGSC RefSeq v2.1 (column B) and CS-CAU (column A). Statistical significance of differential expression was computed …
Gene ID (CS-CAU)	Gene id (IWGSC-RefSeq v2.1)	chr	Length	CRISPR_17_1	CRISPR_17_2	CRISPR_6_1	CRISPR_6_5	CRISPR_16_1	CRISPR_16_4	CRISPR_16_5	DS_2D5_4	DS_2D5_6	DS_2D5_7	DS_2D3_1	DS_2D3_2	DS_2D3_3	DS_2D2_2	DS_2D2_3	DS_2D2_5	CS_1a	CS_1b	CS_2	CS_3	CS_4	t-test CRISPR vs DS2D5	t-test DS vs CS	baseMean	log2FoldChange	lfcSE	padj	Family name	Gene_description	AI notes and manual annotation
TraesCSC3D01G729600	TraesCS3D03G1166900	Chr3D	3052	0.5	0.3	0.3	0.2	0.8	0.3	0.1	0.1	0	0	0.1	0.1	0	0.1	0.1	0.2	0.4	0.1	0.3	0.2	0.1	0.00938407	0.0696673	10.4975	2.05946	0.734188	0.0272169	WAK5	- && sp|Q9LMN7|WAK5_ARATH Wall-associated receptor kinase 5 OS=Arabidopsis thaliana OX=3702 GN=WAK5 PE=2 SV=1 && PF13947:Wall-associated receptor kinase galacturonan-binding|PF00069:Protein kinase domain	Cell Expansion: WAK5, alongside other WAK family members (WAK1–5), is essential for cell enlargement and plant morphogenesis during development. WAKs function as sensors for cell wall integrity. They can distinguish between long pectin polymers in healthy walls and short pectin fragments (oligogalacturonides or OGs) generated during wounding or pathogen attack, triggering appropriate defense resp…
TraesCSC2D01G140400	TraesCS2D03G0191200	Chr2D	1909	0.1	0.1	0.3	0.1	0.5	0.2	0.4	0	0	0	0	0	0	0	0	0	0.3	0.2	0.2	0.3	0.3	0.00736406	0.000445954	3.84729	5.22861	2.4941	0.013112	Trihelix	TraesCS2D01G091800 && sp|Q8GX86|PME21_ARATH Probable pectinesterase/pectinesterase inhibitor 21 OS=Arabidopsis thaliana OX=3702 GN=PME21 PE=2 SV=2 && PF01095:Pectinesterase|PF04043:Plant invertase/pectin methylesterase inhibitor	Acts in the demethylesterification of cell wall pectin (homogalacturonan). By modulating the methylesterification status of pectin, PME21 influences the biophysical properties and elasticity of the cell wall
TraesCSC7B01G512400	TraesCS7B03G0973500	Chr7B	1332	2.5	3.4	4.8	3.2	2.1	3.4	3	1	2.1	0.9	1.7	1.9	1.4	0.7	0.3	0.8	2.9	1.8	0.7	2.4	2.4	0.0137882	0.0948133	26.7939	1.21731	0.367695	0.00802663	-	TraesCS7B01G361500 && - && -	GSL04 (glucan synthase-like 4) (Primary Symbol), atgsl4, ATGSL04 (glucan synthase-like 4), gsl04, CALS8 (CALLOSE SYNTHASE 8), GSL4 (GLUCAN SYNTHASE-LIKE 4)
TraesCSC3B01G384200	TraesCS3B03G0675700	Chr3B	3934	0.9	1	0.8	0.7	0.7	0.6	0.5	0.1	0.1	0	0.1	0.2	0	0	0	0.1	0.1	0	0	0	0	1.5919e-05	0.157834	31.2398	2.68069	0.397789	1.57043e-09	NAC	TraesCS3B01G259500 && sp|Q9FFN2|GLYT3_ARATH Probable glycosyltransferase At5g03795 OS=Arabidopsis thaliana OX=3702 GN=At5g03795 PE=3 SV=2 && -	Glycosyltransferase superfamily, enzymes that catalyze the transfer of sugar moieties to specific acceptor molecules. It is designated in some databases as a putative pectin-glucuronyltransferase. This suggests a role in the biosynthesis or modification of pectin, a structural polysaccharide in plant cell walls.
TraesCSC4D01G377300	TraesCS4D03G0655000	Chr4D	1340	6	4.2	1.4	3.2	1.8	2.2	2.2	1.5	1	1.1	2.1	2	2.3	1	1.6	0.9	3.3	1.3	2	4	1.7	0.0258656	0.136004	40.3761	1.48586	0.445885	0.00665467	MIKC_MADS	TraesCS4D01G276100 && sp|A2XDY1|MADS1_ORYSI MADS-box transcription factor 1 OS=Oryza sativa subsp. indica OX=39946 GN=MADS1 PE=2 SV=2 && PF01486:K-box region|PF00319:SRF-type transcription factor (DNA-binding and dimerisation domain)	TF. OsMADS1 (also known as LEAFY HULL STERILE 1 or LHS1) acts as a central regulator of the rice flower development program, from meristem inception to floral organ differentiation
TraesCSC4A01G031200	TraesCS4A03G0052800	Chr4A	1187	1	2	2.2	1	0.4	0.7	1.3	0.3	0.1	0.3	1	0.9	0.6	0.5	1.1	0.8	1	2.6	0.9	0.5	0.6	0.00664992	0.269725	13.5727	1.73749	0.639117	0.0298894	MIKC_MADS	TraesCS4A01G028100 && sp|A2XDY1|MADS1_ORYSI MADS-box transcription factor 1 OS=Oryza sativa subsp. indica OX=39946 GN=MADS1 PE=2 SV=2 && PF00319:SRF-type transcription factor (DNA-binding and dimerisation domain)|PF01486:K-box region	TF. OsMADS1 (also known as LEAFY HULL STERILE 1 or LHS1) acts as a central regulator of the rice flower development program, from meristem inception to floral organ differentiation
TraesCSC1D01G340100	TraesCS1D03G0603200	Chr1D	1019	2.5	1.7	2	3.8	2.3	2.9	2.2	0.5	0	0	0	0	0	0.4	0	0	0.2	0	0.1	0.3	0.2	7.35446e-05	0.488441	14.8697	3.9752	0.701907	3.31728e-06	-	TraesCS1D01G249300 && sp|Q9ZT66|E134_MAIZE Endo-1,3;1,4-beta-D-glucanase OS=Zea mays OX=4577 PE=1 SV=1 && PF01738:Dienelactone hydrolase family	The enzyme has been found in the cell walls of developing maize shoots. catalyzes the hydrolysis of mixed-linkage beta-D-glucans
TraesCSC4A01G398900	TraesCS4A03G0801200	Chr4A	2266	0.2	0.6	0.3	0.5	1	0.2	0.4	0.9	2.7	1.7	0.7	1.6	0.6	1.7	0.9	3	1.6	1.8	2.2	1.1	1.9	0.122923	0.593625	39.9201	-1.76487	0.436823	0.00103373	INV4	TraesCS4A01G321500 && sp|Q5JJV0|INV4_ORYSJ Beta-fructofuranosidase, insoluble isoenzyme 4 OS=Oryza sativa subsp. japonica OX=39947 GN=CIN4 PE=2 SV=1 && PF00251:Glycosyl hydrolases family 32 N-terminal domain|PF08244:Glycosyl hydrolases family 32 C terminal	Cell wall INV4_ORYSJ Beta-fructofuranosidase. A large and diverse group of enzymes primarily involved in the degradation and debranching of complex plant cell wall polysaccharides, such as hemicellulose and pectin
TraesCSC2A01G526300	TraesCS2A03G0922800	Chr2A	2526	0.7	0.8	0.5	0.4	0.7	0.6	0.4	0.1	0.3	0.1	0.3	0.4	0.3	0.6	0.5	0.1	0.3	0.1	0.2	0.7	0.1	0.00457932	0.879282	18.369	1.32651	0.432551	0.0150389	-	TraesCS2A01G381000 && sp|Q43210|PALY_WHEAT Phenylalanine ammonia-lyase OS=Triticum aestivum OX=4565 GN=PAL PE=3 SV=1 && PF00221:Aromatic amino acid lyase	Phenylalanine ammonia-lyase (PAL) from common wheat (Triticum aestivum). This is the first and rate-limiting step of the phenylpropanoid pathway. In monocots like wheat, some PAL isoforms also exhibit Tyrosine ammonia-lyase (TAL) activity, converting L-tyrosine directly into p-coumaric acid. Precursor for lignin biosynythesis
TraesCSC2A01G132100	TraesCS2A03G0168200	Chr2A	558	1.1	4.5	7.7	4.4	3.9	2.4	2.4	5.9	11.6	15.2	2.3	0.1	1.5	3.8	9.1	14.2	8.2	8.7	8.3	2.7	9.4	0.108471	0.867357	47.7427	-1.58814	0.458099	0.00636547	NAC	TraesCS2A01G086000 && sp|P83304|LEC_PARPC Mannose/glucose-specific lectin (Fragment) OS=Parkia platycephala OX=185447 PE=1 SV=1 && PF03018:Dirigent-like protein	Dirigent-like protein domain, which is involved in guiding the stereoselective coupling of phenolic compounds to form lignans or lignin, also important for plant defense
TraesCSC5B01G126600	TraesCS5B03G0225400	Chr5B	485	11.6	5.1	8.1	11.6	11.2	10.6	10.1	4.8	2.7	2	0.5	1.6	1.1	7.8	4.5	12.2	0	0	0	0	0	0.00142013	0.0112318	50.7518	1.65111	0.352669	5.67198e-05	-	TraesCS5B01G090200 && sp|Q9SJ20|RIR1_ARATH Ribonucleoside-diphosphate reductase large subunit OS=Arabidopsis thaliana OX=3702 GN=RNR1 PE=1 SV=1 && -	Conversion of ribonucleotides to 2'-deoxyribonucleotides (dNTPs)
TraesCSC3D01G466600	TraesCS3D03G0764500	Chr3D	594	161.9	145.2	188	171.3	150.8	145.5	156.5	36.5	21.1	28.8	192.4	170.5	232.6	36.1	42.7	33.6	6.7	10	16.9	12.9	13.6	2.15893e-07	0.0266608	763.742	1.995	0.266125	4.06399e-12	-	TraesCS3D01G342400 && sp|Q43217|H2B3_WHEAT Histone H2B.3 OS=Triticum aestivum OX=4565 PE=1 SV=3 && PF00125:Core histone H2A/H2B/H3/H4	Histone H2B
TraesCSC3A01G136600	TraesCS3A03G0224700	Chr3A	626	36.4	24.4	169.6	155.2	74.2	73.8	56.1	0.1	0.2	0	23	26.6	10.5	0.9	0.4	1.2	0.2	0.6	0	0.5	0.1	0.00765824	0.095871	494.493	5.01522	1.31096	0.000594121	-	TraesCS3A01G102500 && sp|P05621|H2B2_WHEAT Histone H2B.2 OS=Triticum aestivum OX=4565 PE=1 SV=2 && PF00125:Core histone H2A/H2B/H3/H4	Histone H2B
TraesCSC6A01G062000	TraesCS6A03G0076900	Chr6A	654	37.5	26.1	352.7	334.3	315.8	227.1	225.4	16.2	10.3	12.1	51.9	51.5	32.8	4	7	5.6	2.2	3.2	1.8	11.6	0.7	0.00731319	0.0282965	989.119	3.54137	0.715355	9.60091e-06	-	TraesCS6A01G035000 && sp|P05621|H2B2_WHEAT Histone H2B.2 OS=Triticum aestivum OX=4565 PE=1 SV=2 && PF00125:Core histone H2A/H2B/H3/H4	Histone H2B
TraesCSC3A01G246700	TraesCS3A03G0433400	Chr3A	729	33.9	37.9	41.1	36.6	47.5	47.6	45.9	0.6	0.6	0	39.9	34.9	41.3	1	1.3	0.9	0	0	0.1	0	0	1.02855e-06	0.0684971	224.537	3.43015	1.0758	0.00551692	-	TraesCS3A01G181600 && - && -	Hypothetical protein
TraesCSC1D01G200700	TraesCS1D03G0343000	Chr1D	799	12.5	18.3	31.6	25.6	8.7	9.1	12.7	0.8	0.8	1.6	0.1	0.2	0.2	0.1	0.2	0.4	0.9	1.3	3.5	1	2	0.00294749	0.0572819	91.5134	4.11551	0.430791	2.59364e-19	-	TraesCS1D01G136600 && - && PF06839:GRF zinc finger	It plays a role in DNA repair processes, particularly in the 3'-5' end resection of oxidative DNA damage, which is important for activating the DNA damage response pathway.
TraesCSC2D01G407200	TraesCS2D03G0650400	Chr2D	818	2.4	0.8	3.2	3.1	4.1	6	3.3	0.2	0	0.2	0	0	0	0	0	0	6.8	5.4	4	6.5	5.6	0.00184814	0.000324211	16.0272	3.76343	0.759989	4.2924e-05	-	TraesCS2D01G280400 && - && -	LYK3 (LYSM-CONTAINING RECEPTOR-LIKE KINASE 3) (Primary Symbol), ATLYK3
TraesCSC5B01G221700	TraesCS5B03G0422100	Chr5B	923	9.5	7.9	8.5	10	7.3	10.9	8.9	2.3	0.2	0.4	2.5	1	1.3	1.3	3.5	5.3	0	0	0	0	0	0.000522237	0.00658847	93.6252	2.8787	0.357121	7.31073e-14	-	TraesCS5B01G154200 && sp|P51428|RT10_PEA Ribosomal protein S10, mitochondrial OS=Pisum sativum OX=3888 GN=RPS10 PE=2 SV=1 && PF00338:Ribosomal protein S10p/S20e	Mitochondrial ribosomal protein S10 (uS10m)
TraesCSC1A01G576700	TraesCS1A03G1082100	Chr1A	967	7.4	10.5	4.2	8.5	4.5	1.6	5.7	0.5	0.1	0.2	0.3	0.1	0.1	0.2	0.1	0.2	0.1	0.1	0	0	0	0.00206438	0.00843484	68.9884	4.32452	0.502144	1.31852e-15	GRAS	TraesCS1A01G444300 && sp|Q8RXA8|NDK4_SPIOL Nucleoside diphosphate kinase 4, chloroplastic OS=Spinacia oleracea OX=3562 GN=NDK4 PE=1 SV=1 && PF00334:Nucleoside diphosphate kinase	Transfer of the gamma phosphate from ATP to the beta phosphate of a nucleoside diphosphate (NDP)
TraesCSC7A01G328200	TraesCS7A03G0565600	Chr7A	1360	0.2	0.2	0.1	0	0.1	0.2	0.4	0.5	1.4	0.9	0.7	0.8	0.7	1.1	1.2	0.6	2.4	4.3	3.8	5.7	4.9	0.0950554	0.00330578	10.9362	-2.01831	0.528762	0.00217515	NAC	TraesCS7A01G246000 && sp|Q8RWR1|JMJ30_ARATH Lysine-specific demethylase JMJ30 OS=Arabidopsis thaliana OX=3702 GN=JMJ30 PE=1 SV=1 && PF13621:Cupin-like domain	It is a histone demethylase that primarily targets H3K27. It acts as a "molecular brake" for vernalization by maintaining the expression of the floral repressor FLOWERING LOCUS C
TraesCSC1A01G380200	TraesCS1A03G0733100	Chr1A	1695	0.4	0.4	0.2	0.4	0.4	0.5	0.5	0	0	0	0.2	0	0.5	0	0	0.3	0	0	0	0	0	4.18907e-05	0.106548	8.51927	2.03459	0.740981	0.0350579	-	TraesCS1A01G293400 && - && -	ATFDB9 (F-BOX/DUF295 BRASSICEAE-SPECIFIC 9) (Primary Symbol)
TraesCSC7D01G706600	TraesCS7D03G1161600	Chr7D	2046	5.7	4	5.1	3.7	4.9	5.9	4.2	1.2	0.3	1.9	0.9	2.8	1.5	2.2	1.4	2.3	0.8	0.6	0.4	0.7	0.5	0.00274727	0.00416749	90.1529	1.83364	0.306873	8.85822e-08	GRAS	TraesCS7D01G490700 && sp|Q8GT06|MUS81_ORYSJ Crossover junction endonuclease MUS81 OS=Oryza sativa subsp. japonica OX=39947 GN=MUS81 PE=1 SV=1 && PF02732:ERCC4 domain	It functions as a structure-specific endonuclease crucial for maintaining genome stability. It acts in complex with EME1 (Essential Meiotic Endonuclease 1).
TraesCSC1B01G014900	TraesCS1B03G0023400	Chr1B	4621	2.9	1.9	1.4	2.1	1.4	1.5	2	0.6	0.4	0.2	1.1	1.1	0.4	0.8	0.5	0.4	0.3	0.2	0.2	0.3	0.1	0.000210816	0.00652386	127.373	2.21534	0.291919	2.52219e-12	EIL	TraesCS1B01G012000 && sp|Q7XA42|RGA1_SOLBU Putative disease resistance protein RGA1 OS=Solanum bulbocastanum OX=147425 GN=RGA1 PE=2 SV=2 && PF00931:NB-ARC domain|PF18052:Rx N-terminal domain	Defense
TraesCSC6A01G037400	TraesCSU03G0288500	ChrUnknown	2103	27.9	19.7	16.4	20.8	24.3	22.9	26.3	2.3	2.9	1.4	14	10.7	12.5	2.5	2.6	1.8	18.1	19.2	12.8	18.2	13.8	4.05677e-06	0.000309948	515.988	3.39997	0.178706	2.24609e-77	WRKY	TraesCSU01G194300 && sp|Q8LEB6|Y5185_ARATH Probable receptor-like protein kinase At5g18500 OS=Arabidopsis thaliana OX=3702 GN=At5g18500 PE=2 SV=1 && PF00069:Protein kinase domain	RLK family, is likely involved in signal transduction pathways, Development (e.g., control of meristems and organ development and disease resistance
TraesCSC4B01G579300	TraesCS4B03G1001100	Chr4B	1810	0.5	2.4	1.6	1.8	0.9	1.5	2	0.3	0.2	0.8	0.5	0.5	0.5	0.7	0.4	0.6	0.3	0.2	0.2	0.3	0.3	0.00820484	0.00485934	30.7311	1.70251	0.478194	0.00348807	-	TraesCS4B01G393800 && sp|Q9FJV2|FBD27_ARATH Putative FBD-associated F-box protein At5g56560 OS=Arabidopsis thaliana OX=3702 GN=At5g56560 PE=4 SV=2 && -	F-box Domain: A structural motif of approximately 50 amino acids typically found at the N-terminus. This domain mediates interaction with SKP1, linking the protein to the core SCF (Skp1-Cullin-F-box) E3 ubiquitin ligase complex
TraesCSC7A01G467800	TraesCS7B03G0661300	Chr7B	303	36.5	29.3	38.3	33.1	33.1	43.5	36.8	35.1	42	35	43.2	39.1	48.3	38.5	43.3	34.3	41.9	46.4	46.5	54.3	39.4	0.613538	0.0912568	649.332	1.1941	0.133693	6.56344e-17	-	TraesCS7B01G236500 && - && -	Probably not a gene
TraesCSC2B01G225600	TraesCS2B03G0332400	Chr2B	1660	25.4	20.2	30.7	29.2	24.9	24.1	27.7	6.1	6.4	5.1	8.2	6	4.6	9	7.4	7.9	4.5	5.3	4.5	2.8	5.1	1.86533e-06	0.00478508	487.031	1.9754	0.138987	3.65705e-43	B3	- && sp|Q54DA8|STIP1_DICDI Protein STIP1 homolog OS=Dictyostelium discoideum OX=44689 GN=sti1 PE=3 SV=1 && PF12796:Ankyrin repeats (3 copies)	Adaptor protein and co-chaperone that coordinates the functions of the HSP70 and HSP90 chaperone systems in protein folding
TraesCSC6B01G301000	TraesCS6B03G0487400	Chr6B	2283	2.4	3.8	13.6	14.3	8.5	7.7	9.8	0.1	1	0.8	0.3	2.6	0.4	0.1	0.2	0.2	3.4	4	2.4	4	1.5	0.00318219	0.00396453	221.061	3.10636	0.65838	3.11704e-05	-	TraesCS6B01G189800 && - && PF13365:Trypsin-like peptidase domain	trypsin-like peptidase
TraesCSC6B01G358800	TraesCS6B03G0665200	Chr6B	369	12.3	8.7	11.4	12.5	13.5	9.8	12.1	0	0.1	0	14.6	10.6	9.9	10.5	8	10.5	16	14.7	8.7	12.3	15.3	1.73826e-06	0.0180237	40.0561	4.03227	0.913046	0.000144548	NF-YC	TraesCS6B01G232400 && sp|O22040|ANP1_ARATH Mitogen-activated protein kinase kinase kinase ANP1 OS=Arabidopsis thaliana OX=3702 GN=ANP1 PE=1 SV=2 && PF00069:Protein kinase domain	A positive regulation of cytokinesis. ANP1, along with two other related proteins (ANP2 and ANP3), plays a redundant role in the positive regulation of cytokinesis.
TraesCSC1B01G619600	TraesCS1B03G1163300	Chr1B	1067	0.8	0.4	0.2	0.4	0.7	0.4	0.2	1	2.1	2.4	0.6	0.7	0.6	2.8	3.3	3.6	0.6	0.7	0.6	1.1	1.1	0.0766679	0.0286978	13.2394	-1.84386	0.496333	0.00301833	bZIP	TraesCS1B01G429900 && sp|Q2QLV9|PSY2_ORYSJ Phytoene synthase 2, chloroplastic OS=Oryza sativa subsp. japonica OX=39947 GN=PSY2 PE=1 SV=1 && -	ABA, first committed step in the biosynthesis of carotenoids: the conversion of two molecules of geranylgeranyl diphosphate (GGPP) into a 15-cis-phytoene molecule
TraesCSC2A01G177700	TraesCS2A03G0240900	Chr2A	1485	7.2	10.8	9.2	4.8	8.3	6.5	7.9	1.3	1.3	1.9	1.7	1.9	2.1	1.7	1.5	2.9	1.1	1.1	1.3	1.1	1.8	7.92262e-05	0.0284244	157.739	1.91608	0.262562	1.91635e-11	B3	- && sp|Q54DA8|STIP1_DICDI Protein STIP1 homolog OS=Dictyostelium discoideum OX=44689 GN=sti1 PE=3 SV=1 && PF07719:Tetratricopeptide repeat|PF12796:Ankyrin repeats (3 copies)	Adaptor protein and co-chaperone that coordinates the functions of the HSP70 and HSP90 chaperone systems in protein folding
TraesCSC1B01G015300	TraesCS1B03G0023900	Chr1B	4729	1.7	1.6	1.2	0.8	1.3	1.4	0.8	0.5	0.6	0.7	0.7	0.5	0.4	0.3	0.5	0.5	0.4	0.4	0.2	0.3	0.4	0.00225802	0.0101269	75.9889	1.01605	0.233546	0.000270907	EIL	TraesCS1B01G012200 && sp|Q7XA39|RGA4_SOLBU Putative disease resistance protein RGA4 OS=Solanum bulbocastanum OX=147425 GN=RGA4 PE=2 SV=1 && PF00931:NB-ARC domain	Defense
TraesCSC1B01G526700	TraesCS4A03G1010400	Chr4A	1060	50.1	38.4	38.5	47.2	41.3	43.7	45.6	40.9	38.4	44.9	54.9	61.5	47.2	58.4	49.5	39.7	51.1	38.1	36.4	55.5	36.9	0.433118	0.358792	255.164	7.18636	1.4238	4.4233e-06	-	TraesCS4A01G407000 && - && -	ACA2 (alpha carbonic anhydrase 2) (Primary Symbol), ATACA2 (ALPHA CARBONIC ANHYDRASE 2)
TraesCSC5D01G346500	TraesCS5D03G0612100	Chr5D	1902	1.1	0.9	0.8	0	0.7	0.8	0.5	0.1	0.2	0.2	0.1	0.4	0.6	0.3	0.3	0.3	0.7	0.5	0.5	0.6	0.3	0.00756499	0.0188798	17.1014	1.87484	0.741306	0.0374614	-	- && sp|Q9LUR0|CNDH2_ARATH Condensin-2 complex subunit H2 OS=Arabidopsis thaliana OX=3702 GN=CAPH2 PE=2 SV=1 && PF06278:Condensin II complex subunit CAP-H2 or CNDH2, N-terminal|PF16858:Condensin II complex subunit CAP-H2 or CNDH2, C-term|PF16869:PF16858	CAP-H2 is a regulatory subunit of the condensin-II complex, which provides chromosomes with rigidity and establishes mitotic chromosome architecture
TraesCSC2B01G621500	TraesCS2B03G1110300	Chr2B	494	12.8	17.3	25	26	20	7	17.2	0.4	0.5	0	1.1	0.2	0	0	0.1	0	0.8	0.8	0.5	1	0.5	0.000416773	0.0118047	120.872	5.519	0.464642	2.78309e-29	CO-like	TraesCS2B01G436500 && sp|P62785|H41_WHEAT Histone H4 variant TH011 OS=Triticum aestivum OX=4565 PE=3 SV=2 && PF15511:Centromere kinetochore component CENP-T histone fold	Histone H4
TraesCSC3D01G326100	TraesCS3D03G0551100	Chr3D	1027	1.6	1.3	2	1.3	1.2	1.1	0.7	1.5	3.3	5.2	1.6	1.5	3.6	2.5	3.3	2.5	3.8	3.1	4.8	4.8	7.2	0.197184	0.0456965	30.3875	-1.04395	0.392195	0.0368818	HD-ZIP	TraesCS3D01G221800 && sp|Q9XH38|HOX3_ORYSI Homeobox-leucine zipper protein HOX3 OS=Oryza sativa subsp. indica OX=39946 GN=HOX3 PE=1 SV=1 && PF00046:Homeodomain|PF02183:Homeobox associated leucine zipper	Transcription factor
TraesCSC3A01G060900	TraesCS3A03G0091200	Chr3A	3037	8.5	9.4	7.7	6.6	9.7	8.8	10.2	4.8	3.7	3.4	4.4	6.2	4.3	6	4.9	5.4	6.5	6.2	5.5	6.6	5.2	0.000191455	0.0148322	304.849	1.04307	0.135152	1.13077e-12	FAR1	TraesCS3A01G045400 && - && -	Unknown function
TraesCSC6D01G317900	TraesCS6D03G0486200	Chr6D	1771	3.5	2.3	4.1	10	3.9	4.8	8.7	1.5	1.2	1.4	1.6	1.5	1.4	0.2	0.2	0.2	1.4	1.8	1.6	1.2	2.2	0.01064	0.0418309	102.959	1.84088	0.354531	5.02184e-06	NF-YB	TraesCS6D01G196500 && - && PF12796:Ankyrin repeats (3 copies)	This is one of the most common protein-protein interaction motifs found in nature.
TraesCSC7A01G209700	TraesCS7A03G0345600	Chr7A	1417	3.8	2.5	2.8	3.8	1.9	1.8	1.6	5.3	7.6	3.8	5.5	4.8	2.7	1.9	3.4	8.9	4	3.8	3.1	2	2.9	0.103652	0.0645393	93.3882	-1.13926	0.286891	0.00123376	DBB	TraesCS7A01G147300 && sp|Q6K602|SWT15_ORYSJ Bidirectional sugar transporter SWEET15 OS=Oryza sativa subsp. japonica OX=39947 GN=SWEET15 PE=2 SV=1 && PF03083:Sugar efflux transporter for intercellular exchange	a low-affinity uniporter/facilitator, mediating both the uptake and efflux of sugar across the plasma membrane depending on the concentration gradient. It transports sucrose, Located on the plasma membrane of plant cells. Expression of this gene promotes senescence
TraesCSC2B01G525400	TraesCS2B03G0931400	Chr2B	1016	5.9	3.2	8.3	8.1	8.5	7.8	10.1	3.7	0.8	2	1.5	3.1	3	6.5	6.2	7.4	5.3	4.9	6.1	5	4.7	0.00451632	0.122325	68.9833	1.47234	0.413285	0.00324309	-	TraesCS2B01G362300 && - && -	hypothetical protein
TraesCSC4D01G247800	TraesCS4D03G0441400	Chr4D	1609	1.2	1.4	0.7	1	1.2	0.9	0.8	0.2	0.2	0.1	0	0	0.1	0	0	0.1	0	0	0	0	0	4.62859e-05	0.0231978	18.7677	1.84574	0.451182	0.000800712	-	TraesCS4D01G178100 && - && -	Unknown protein
TraesCSC6A01G118900	TraesCS6A03G0174200	Chr6A	1778	0.8	1.1	0.8	0.6	0.5	0.4	1.1	0.3	0.1	0.2	0.6	0.4	0.4	0.4	0.5	0.1	0.3	0	0.2	0.1	0.1	0.00160279	0.0282689	14.3647	2.11425	0.567541	0.00280665	-	TraesCS6A01G076400 && - && PF12937:F-box-like	F-box-like
TraesCSC6A01G367000	TraesCS6A03G0721200	Chr6A	743	8.1	26.5	11.8	13.7	10.5	10.5	13.7	4.6	4.5	6.8	2.6	3.6	5.6	4	6.2	4.1	5.6	7.3	6.8	4.8	6.7	0.0107309	0.0313353	205.708	1.23178	0.274138	0.000126163	GRF	- && sp|Q6ZIK5|GRF4_ORYSJ Growth-regulating factor 4 OS=Oryza sativa subsp. japonica OX=39947 GN=GRF4 PE=1 SV=1 && PF08880:QLQ|PF08879:WRC	Transcription factor. GRF4 positively regulates grain size by promoting both cell division and cell expansion, leading to increased grain length and width
TraesCSC3A01G187100	TraesCS3A03G0314500	Chr3A	1401	5.1	4.7	3.7	5.4	7.2	6.4	7.3	2.6	1.2	1.6	2.8	4.1	2.1	1.7	1.7	2.6	1.4	1.5	0.7	2.1	1.5	0.000549878	0.043856	94.7794	1.55882	0.248145	1.5965e-08	YABBY	TraesCS3A01G135500 && sp|Q9LWM4|CIPK5_ORYSJ CBL-interacting protein kinase 5 OS=Oryza sativa subsp. japonica OX=39947 GN=CIPK5 PE=2 SV=1 && PF03822:NAF domain|PF00069:Protein kinase domain	A key component of the CBL-CIPK calcium signaling network,
TraesCSC7B01G705000	TraesCS7B03G1287400	Chr7B	5973	1.1	1.4	2.8	3.7	2.4	2.6	2	0.7	0.8	0.5	0.9	1	0.6	0.9	1	1.2	1.2	0.6	0.6	0.7	0.6	0.00240123	0.471706	11.8082	1.74626	0.575157	0.0172148	FAR1	TraesCS7B01G479200 && sp|Q7XA40|RGA3_SOLBU Putative disease resistance protein RGA3 OS=Solanum bulbocastanum OX=147425 GN=RGA3 PE=2 SV=2 && PF00931:NB-ARC domain	Defense
TraesCSC5A01G380700	TraesCS5A03G0740600	Chr5A	2799	0.3	0.5	1.1	0.7	1	0.9	1.1	0.1	0.2	0.5	0.4	0.7	0.1	0.2	0.1	0.2	0.3	0.5	0.4	0.3	0.4	0.0198528	0.22473	28.9422	1.44452	0.456033	0.0101395	C3H	TraesCS5A01G304300 && sp|Q76CY8|PAIR2_ORYSJ Meiosis-specific protein PAIR2 OS=Oryza sativa subsp. japonica OX=39947 GN=PAIR2 PE=2 SV=1 && -	PAIR2 is an essential factor for the pairing (synapsis) of homologous chromosomes during meiosis I. In its absence (pair2-null mutant), synapsis is completely eliminated
TraesCSC4A01G052400	TraesCS4A03G0087700	Chr4A	1193	1.6	1.6	2.1	2.3	1.9	2.3	1.9	1.2	0.7	0.9	2.3	2	1.2	1.2	0.8	0.5	0.8	0.3	0.6	1	0.8	0.00348586	0.0519529	30.8542	1.00013	0.300892	0.00795338	-	TraesCS4A01G045100 && - && -	Protein of unknown function
TraesCSC3D01G083700	TraesCS3D03G0123300	Chr3D	1726	5.1	5.1	5.5	4.4	4.7	5.6	5.3	0.9	1.4	2	1.5	2.2	1.3	1.9	1.3	1.1	1.3	0.7	0.5	0.8	1.4	0.00169978	0.032508	110.077	1.96421	0.197051	5.27434e-21	-	TraesCS3D01G064000 && - && -	F-box protein;(source:Araport11)
TraesCSC1D01G126400	TraesCS1D03G0200500	Chr1D	894	2.1	3.9	2.7	2.7	1.8	4.3	3.4	0	0.1	0.1	0.1	0.1	0.2	0.3	0.4	0.1	0	0.1	0	0.3	0.1	0.000145952	0.439831	30.9629	4.46617	0.573492	4.00609e-12	-	TraesCS1D01G086800 && - && PF06839:GRF zinc finger	It plays a role in DNA repair processes, particularly in the 3'-5' end resection of oxidative DNA damage, which is important for activating the DNA damage response pathway.
TraesCSC5D01G701800	TraesCS5D03G1185600	Chr5D	390	4.4	2.2	1.9	2.4	3.7	3.4	1.5	0.4	0.9	0.6	0.2	0.5	1	0	0	0	0.3	0	0.4	0	0.2	0.00130651	0.171001	11.4268	1.84398	0.545343	0.00822763	-	TraesCS5D01G543400 && - && PF06839:GRF zinc finger	Encodes serine/threonine kinase 1 (SIK1), a Hippo homolog. Regulates cell proliferation and cell expansion
TraesCSC4A01G438800	TraesCS4A03G0859700	Chr4A	879	2.6	1.8	2.7	3.6	2.6	3.4	2.8	0.9	0.3	0.9	0.4	0.5	1.1	1	0.5	1.5	1.8	1.6	2.4	0.4	2.1	0.000277683	0.061785	23.8694	1.62048	0.397112	0.000759702	-	TraesCS4A01G346300 && sp|O49460|PHB1_ARATH Prohibitin-1, mitochondrial OS=Arabidopsis thaliana OX=3702 GN=PHB1 PE=1 SV=1 && -	PHB1 localizes primarily to the inner mitochondrial membrane (IMM), where it forms large, ring-like multimeric complexes. These complexes serve as scaffolds to stabilize respiratory enzymes and maintain cristae morphology
TraesCSC5A01G033600	TraesCS5A03G0057000	Chr5A	1284	3.2	3	1.9	1.8	0.9	2.7	1.5	0.9	0.7	0.4	0.2	1.2	0.3	0.5	0.7	0.6	0.4	0.9	0.9	0.8	1.2	0.003215	0.199353	32.6978	1.73508	0.414122	0.000454551	-	TraesCS5A01G023400 && - && -	Encodes a member of the RLCK VII-4 subfamily of receptor-like cytoplasmic kinases that has been shown to phosphorylate MAPKKK5 Ser-599 and MEKK1 Ser-603, both players in PRR-mediated resistance to bacterial and fungal pathogens
TraesCSC7B01G254500	TraesCS7B03G0462400	Chr7B	847	5.7	3.1	4.5	5.5	5.6	7	3	0	0	0.2	0.3	0.1	0	4.5	4.2	2.3	1.6	2.5	1	3.8	4.5	0.000110459	0.155242	53.102	5.92367	0.69005	2.0011e-14	ERF	TraesCS7B01G171400 && sp|Q9FV52|MAP1B_ARATH Methionine aminopeptidase 1B, chloroplastic OS=Arabidopsis thaliana OX=3702 GN=MAP1B PE=2 SV=2 && PF04765:Protein of unknown function (DUF616)|PF00557:Metallopeptidase family M24	Methionine aminopeptidases (MetAPs) like MAP1B catalyze the co- or post-translational cleavage of this starting methionine
TraesCSC6B01G137100	TraesCS6B03G0194400	Chr6B	671	0.3	1.7	2.4	2.4	1.7	1.6	2.6	8.9	6.2	5.1	2.9	4.5	6.7	3.2	5.3	2.4	2.3	3.5	3.6	5.2	3.4	0.0411224	0.112933	22.0444	-1.54218	0.420052	0.00324623	B3	TraesCS6B01G082000 && sp|P68429|H32_MEDSA Histone H3.2 OS=Medicago sativa OX=3879 GN=H3-1.1 PE=1 SV=2 && PF00125:Core histone H2A/H2B/H3/H4	Histone H3
TraesCSC5D01G201300	TraesCS5D03G0366300	Chr5D	1772	2.4	2.6	1.7	1.6	2.2	3.2	4.6	0.1	0.2	0.3	0.3	0.1	0.1	0.2	0.1	0.1	0.3	0.1	0.2	0.4	0.3	0.000733157	0.157569	51.1144	4.0485	0.456743	2.69465e-16	bHLH	TraesCS5D01G146500 && sp|B9G934|C14C3_ORYSJ Cytochrome P450 714C3 OS=Oryza sativa subsp. japonica OX=39947 GN=CYP714C3 PE=3 SV=2 && PF00067:Cytochrome P450	P450
TraesCSC6B01G101500	TraesCS6B03G0141300	Chr6B	1664	0.2	0.4	0.5	0.3	0.7	0.3	0.4	0.7	1	1.5	1	0.9	1.7	1.1	1.1	1.5	0.5	1.3	1	0.4	0.7	0.0948894	0.0893286	19.3733	-1.10018	0.415113	0.0368818	-	TraesCS6B01G060000 && - && -	FBXL (Primary Symbol). Encodes a F-box/RNI protein. RNI is RNase inhibitor. Expressed in young flowers.
TraesCSC1B01G428400	TraesCS1B03G0820400	Chr1B	201	3.5	2.3	2.2	3.9	2.4	0.4	2.1	0	0	0	0.7	0.3	0	0	0	0	0	0	0	0	0	0.00132872	0.205854	10.8772	2.73784	0.924116	0.0197903	-	TraesCS1B01G294500 && sp|A2WWU2|H2B11_ORYSI Histone H2B.11 OS=Oryza sativa subsp. indica OX=39946 GN=H2B.11 PE=3 SV=1 && PF00125:Core histone H2A/H2B/H3/H4	Histone H2B
TraesCSC7A01G246600	TraesCS7A03G0418000	Chr7A	542	3.6	1.1	8.6	5.9	3.2	2	7.3	0.2	0	0	0.2	0	0	0	1	0.4	0.2	0	0	0	0	0.00550453	0.203735	14.5085	4.52594	0.968153	0.000291331	CO-like	TraesCS7A01G178900 && sp|P62785|H41_WHEAT Histone H4 variant TH011 OS=Triticum aestivum OX=4565 PE=3 SV=2 && PF15511:Centromere kinetochore component CENP-T histone fold	Histone H4
TraesCSC2B01G099400	TraesCS2B03G0140600	Chr2B	4095	0	0	0.1	0	0.1	0.1	0	0.2	0.2	0.2	0.1	0	0	0	0.1	0.1	0.1	0.1	0.1	0	0.1	0.000237744	0.579529	7.22463	-2.12495	0.64788	0.0102749	NAC	- && sp|F7J0M6|RGA4S_ORYSJ Disease resistance protein RGA4 OS=Oryza sativa subsp. japonica OX=39947 GN=RGA4 PE=2 SV=1 && PF00931:NB-ARC domain	Defense
TraesCSC4A01G138700	TraesCS4A03G0248800	Chr4A	1571	6.1	8.5	3.2	7	7	6.6	7.1	2.5	1	0.9	5.8	9.2	2.4	2.9	1.2	1.4	1.1	0.7	0.7	3.7	1.2	0.000421566	0.176439	87.5547	1.70806	0.322311	3.31728e-06	NAC	TraesCS4A01G120800 && sp|A3A8W2|P2C21_ORYSJ Probable protein phosphatase 2C 21 OS=Oryza sativa subsp. japonica OX=39947 GN=Os02g0606900 PE=2 SV=2 && PF00481:Protein phosphatase 2C	conversion of ribonucleotides to 2'-deoxyribonucleotides (dNTPs)
TraesCSC7B01G328200	TraesCS7B03G0643000	Chr7B	2216	1.2	1.3	1.6	1.7	0.8	1.9	1.2	3.5	3.1	3.6	3.9	4.4	2.8	3.3	2.5	4.4	3	2.4	3.3	2.7	4.1	0.000114823	0.303482	79.5137	-1.36921	0.211329	6.52295e-09	-	- && - && -	Reverse transcriptase domain
TraesCSC7B01G002700	TraesCS7B03G0004700	Chr7B	4429	1.6	1.4	1.3	1.4	1	1.8	0.8	0.4	0.6	0.2	0.7	0.8	0.8	0.9	0.9	0.9	0.9	0.6	1	0.9	0.6	0.00123613	0.36521	57.4973	1.61909	0.31188	5.86899e-06	FAR1	TraesCS7B01G002300 && sp|Q7XA40|RGA3_SOLBU Putative disease resistance protein RGA3 OS=Solanum bulbocastanum OX=147425 GN=RGA3 PE=2 SV=2 && PF00931:NB-ARC domain	Defense
TraesCSC1A01G261600	TraesCS1D03G0501900	Chr1D	2252	0.7	0.8	3.2	2.7	4.3	4.1	4.6	0.8	1	0.6	0.7	0.3	0.2	0.4	0.7	0.6	1.2	1.7	1.1	0.5	1.2	0.0130627	0.0413788	15.4539	2.31877	0.62449	0.00279913	WRKY	TraesCS1D01G196500 && sp|Q9FPS2|UBP25_ARATH Ubiquitin carboxyl-terminal hydrolase 25 OS=Arabidopsis thaliana OX=3702 GN=UBP25 PE=2 SV=1 && PF00443:Ubiquitin carboxyl-terminal hydrolase	UBP23 (UBIQUITIN-SPECIFIC PROTEASE 23) (Primary Symbol)
TraesCSC4D01G128400	TraesCS4D03G0204300	Chr4D	5144	0.9	0.9	0.3	0.4	1.8	1.3	2.5	0.2	0.2	0.2	0.6	0.5	0.6	0.4	0.3	0.4	0.7	0.5	0.3	0.7	0.4	0.017803	0.181555	64.07	2.52743	0.50415	1.04034e-05	EIL	TraesCS4D01G103400 && sp|Q7XA40|RGA3_SOLBU Putative disease resistance protein RGA3 OS=Solanum bulbocastanum OX=147425 GN=RGA3 PE=2 SV=2 && PF00931:NB-ARC domain|PF18052:Rx N-terminal domain	Defense
TraesCSC3D01G638100	TraesCS3D03G1033800	Chr3D	5180	0.9	0.3	1	1	0.7	0.4	0.3	0.1	0.1	0.2	0.1	0.3	0.2	0.2	0.1	0.1	0.1	0.3	0.3	0.1	0.2	0.00444862	0.413687	32.9233	2.07894	0.481824	0.000278363	EIL	TraesCS3D01G469300 && sp|Q7XA40|RGA3_SOLBU Putative disease resistance protein RGA3 OS=Solanum bulbocastanum OX=147425 GN=RGA3 PE=2 SV=2 && PF18052:Rx N-terminal domain|PF00931:NB-ARC domain	Defense
TraesCSC6B01G427500	TraesCS6B03G0795600	Chr6B	848	2.1	1.7	1	0.6	1.6	3.1	2.4	0	0	0	0.1	0	0.3	0.6	0.2	0.5	0.1	0.2	0	0	0	0.00137911	0.16562	14.2755	5.86726	1.32678	1.48701e-05	-	TraesCS6B01G273700 && - && -	RGAT1 (RGA TARGET 1) (Primary Symbol). In Arabodopsis, petal differentiation and expansion stage
TraesCSC3A01G297300	TraesCS3A03G0562500	Chr3A	1070	0.2	0.4	0.5	0.4	0.3	0.3	0.2	0.8	2.4	2.1	0.1	0.6	0.2	0.7	1.3	2.3	1.4	0.7	0.8	0.4	0.6	0.0984229	0.282854	16.3192	-2.54127	0.471142	3.31728e-06	C2H2	- && sp|Q9FL54|DNAJ6_ARATH Chaperone protein dnaJ 6 OS=Arabidopsis thaliana OX=3702 GN=ATJ6 PE=2 SV=1 && PF00226:DnaJ domain	AtJ6 stimulates the ATPase activity of Hsp70 chaperones, which is crucial for Hsp70 to bind effectively to its client proteins and facilitate proper folding or degradation
TraesCSC5D01G376400	TraesCS5D03G0661200	Chr5D	516	4.7	3.5	21.2	17.8	25.5	25.3	27.5	0.2	0	0	0	0.3	0	0	0	0	0	0	0	0	0	0.0031985	0.178599	89.1009	8.63209	1.46272	6.87609e-10	-	TraesCS5D01G290200 && sp|Q9LU89|2A5N_ARATH Serine/threonine protein phosphatase 2A 59 kDa regulatory subunit B' eta isoform OS=Arabidopsis thaliana OX=3702 GN=B'ETA PE=1 SV=1 && PF01603:Protein phosphatase 2A regulatory B subunit (B56 family)	serine/threonine protein phosphatase 2A (PP2A) 59 kDa regulatory subunit Beta isoform
TraesCSC3B01G192300	TraesCS3B03G0276200	Chr3B	2234	0.1	0	0.8	0.8	0.5	0.6	0.2	0	0	0	0.3	0.1	0	0	0.1	0.7	0.2	0.3	0	0.4	0.3	0.0139077	0.323857	9.38628	4.20141	1.25662	0.0169189	NF-YC	TraesCS3B01G119800 && sp|A2XFI3|PDC2_ORYSI Pyruvate decarboxylase 2 OS=Oryza sativa subsp. indica OX=39946 GN=PDC2 PE=2 SV=2 && PF02776:Thiamine pyrophosphate enzyme, N-terminal TPP binding domain|PF00205:Thiamine pyrophosphate enzyme, central domain	Pyruvate decarboxylase (PDC) is a key enzyme in anaerobic metabolism (fermentation). PDC activity is significantly induced during anoxia
TraesCSC3B01G544400	TraesCS3B03G0968900	Chr3B	1220	0.5	0.7	0.6	0.4	0.3	0.6	0.6	0.1	0.1	0.2	0.1	0.2	0.1	0.1	0	0	0.1	0.2	0.1	0.1	0.2	0.000220429	0.265583	21.3042	2.06871	0.425739	3.24306e-05	-	TraesCS3B01G387300 && - && PF07893:Protein of unknown function (DUF1668)	Likely pseudogene
TraesCSC3A01G526400	TraesCS3A03G0976700	Chr3A	1456	2.4	2	1.6	3	1.4	1.3	2.3	0.8	0.2	0.9	0.7	0.4	0.7	0.4	1.1	0.8	0.7	0.2	0.5	0.3	0.6	0.00452338	0.146965	30.6899	1.79302	0.364428	2.3149e-05	-	TraesCS3A01G420600 && - && -	Encodes a bHLH transcription factor that together with bHLH089 and bHLH091 is important for the normal transcriptome of the developing Arabidopsis anther, possibly by forming a feed-forward loop with DYT1
TraesCSC3B01G406600	TraesCS3B03G0716500	Chr3B	690	4.4	2.3	1.9	2	3.9	4.8	3.6	1.7	0.8	0.9	2.4	2.3	2.1	3.1	1.7	1.6	1.7	0.4	0.8	2.3	0.7	0.00396584	0.161342	54.0419	1.36101	0.337263	0.000759702	TCP	TraesCS3B01G276600 && sp|Q0JJV1|VDAC4_ORYSJ Mitochondrial outer membrane protein porin 4 OS=Oryza sativa subsp. japonica OX=39947 GN=VDAC4 PE=3 SV=3 && PF01459:Eukaryotic porin	VDAC4 (Voltage-Dependent Anion Channel 4), a mitochondrial outer membrane protein
TraesCSC5D01G673100	TraesCS5D03G1144000	Chr5D	780	21.6	19.3	16	14.9	22.8	16.4	25	3	3.2	1.3	0.7	0.9	0.2	14.9	10.5	18.9	3	3.5	0.4	5.3	1.3	7.39479e-06	0.220082	67.7324	2.35234	0.236191	7.51269e-21	-	TraesCS5D01G524000 && - && -	PAO2 (polyamine oxidase 2) (Primary Symbol), ATPAO2 (Polyamine oxidase 2)
TraesCSC6B01G590900	TraesCS6B03G1100200	Chr6B	2335	2.2	1.8	1.3	0.8	1.1	0.9	2.4	0.2	0.1	0.4	0	0.1	0	0.9	1	1.5	0	0.1	0	0	0.7	0.0014794	0.198853	37.9522	2.49684	0.432748	3.42401e-07	WRKY	TraesCS6B01G388900 && sp|Q2R8L1|RGA5S_ORYSJ Disease resistance protein RGA5 OS=Oryza sativa subsp. japonica OX=39947 GN=RGA5 PE=2 SV=1 && PF00931:NB-ARC domain	Defense
TraesCSC7D01G376500	TraesCS7D03G0593900	Chr7D	1779	1.2	1.9	1.3	0.9	1.2	1.5	0.9	2.9	3.7	4.8	1.7	1.9	1.8	2.7	3	1.6	3.7	2.4	3.1	3	2.8	0.0379102	0.453502	57.5045	-1.20309	0.289046	0.000627072	TCP	TraesCS7D01G262700 && sp|Q8LJW3|ACR4_ARATH ACT domain-containing protein ACR4 OS=Arabidopsis thaliana OX=3702 GN=ACR4 PE=2 SV=1 && PF01842:ACT domain	ACT domain-containing protein ACR4 in Epidermal Differentiation, Meristem Control and Signal Transduction
TraesCSC6A01G064700	TraesCS6A03G0082600	Chr6A	1292	8.1	5.2	8.5	6.7	4.4	6.5	8.5	0.5	0.1	0.7	1.9	1.5	1.2	2.5	0.8	1.1	1.8	2.1	1.6	0.9	1.1	2.35073e-05	0.30512	93.6089	3.6256	0.313177	2.70783e-28	NAC	TraesCS6A01G037000 && sp|A3A8W2|P2C21_ORYSJ Probable protein phosphatase 2C 21 OS=Oryza sativa subsp. japonica OX=39947 GN=Os02g0606900 PE=2 SV=2 && PF00481:Protein phosphatase 2C	Probable protein phosphatase 2C 21 from the rice species Oryza sativa PP2C family in rice is known for several critical roles: Stress Signaling, innate immunity, developmental regulation.
TraesCSC6B01G109200	TraesCS6B03G0151800	Chr6B	1783	0	0.2	0.2	0	0	0	0	0.4	0.7	1	0.5	0.3	0.6	0.4	0.5	0.3	0.5	0.3	0.4	0.3	0.5	0.0596979	0.183881	6.35548	-2.67906	0.850364	0.0159788	-	TraesCS6B01G065000 && - && PF03478:Protein of unknown function (DUF295)	ATFDA17 (F-BOX/DUF295 ANCESTRAL 17) (Primary Symbol). F-box SKIP23-like protein (DUF295);(source:Araport11)
TraesCSC5D01G015400	TraesCS5D03G0029100	Chr5D	1593	10.6	12.1	3.5	8.9	7.6	7.7	3	4.3	1.9	1.8	1.7	2.1	1	1	2.4	1.3	3.3	3.4	1.9	5.7	0.8	0.0115585	0.277311	137.368	1.31258	0.509359	0.0311183	bHLH	TraesCS5D01G013500 && - && PF17820:PDZ domain|PF13365:Trypsin-like peptidase domain	HtrA (High-temperature requirement A) family of serine proteases.
TraesCSC5D01G707900	TraesCS5D03G1198800	Chr5D	3834	0.5	0.4	0.2	0.5	0.2	0.2	0.2	0.1	0.1	0.1	0.4	0.3	0.1	0.1	0.1	0.1	0.2	0.2	0.2	0.2	0.2	0.00823735	0.27207	16.6386	1.52746	0.472217	0.0101395	FAR1	TraesCS5D01G549400 && sp|Q7XA40|RGA3_SOLBU Putative disease resistance protein RGA3 OS=Solanum bulbocastanum OX=147425 GN=RGA3 PE=2 SV=2 && PF00931:NB-ARC domain	Defense
TraesCSC1D01G077700	TraesCS1D03G0111500	Chr1D	3042	0.1	0.1	0	0.1	0	0	0	0.2	0.2	0.3	0.3	0.2	0.2	0.2	0.2	0.3	0.2	0.4	0.2	0.2	0.5	0.0107365	0.359018	5.71691	-2.07368	0.798327	0.0477683	WRKY	- && sp|P0DO07|PIK2_ORYSJ Disease resistance protein Pik-2 OS=Oryza sativa subsp. japonica OX=39947 GN=PIK-2 PE=3 SV=1 && PF00931:NB-ARC domain|PF18052:Rx N-terminal domain	Defense
TraesCSC5A01G705900	TraesCS3A03G0069100	Chr3A	510	4.3	4.8	4.7	5.2	9.3	5.7	5	5.5	5.6	7.2	2.7	5.7	3.3	5.4	3.8	6.1	2.1	2	1.7	2	1.3	0.552435	0.000112042	5.46859	3.44056	1.09077	0.0389436	bHLH	TraesCS3A01G032900 && - && PF07714:Protein tyrosine kinase	a Pfam protein domain identifier representing the protein tyrosine kinase catalytic domain
TraesCSC5D01G450100	TraesCS5D03G0773400	Chr5D	1956	0.2	0.5	0.2	0	1	0.4	0.5	0.1	0.2	0.1	0.1	0.1	0.1	0.2	0.1	0.4	0.1	0.1	0	0.3	0	0.073113	0.416181	27.9352	1.75954	0.428908	0.000648439	-	TraesCS5D01G344800 && - && PF03372:Endonuclease/Exonuclease/phosphatase family	Pfam identifier for the Endonuclease/Exonuclease/phosphatase (EEP) family
TraesCSC1B01G183700	TraesCS1B03G0319900	Chr1B	2232	0.3	1.6	1.1	1.1	0.8	0	0.8	0.5	0.1	0	1.2	0.3	0.4	0.7	0	0.2	0.2	0.1	0	0	0.4	0.0433932	0.137301	10.6595	1.83484	0.675209	0.0323827	-	TraesCS1B01G117100 && - && PF00161:Ribosome inactivating protein	This modification prevents elongation factor 2 (EF-2) from binding to the ribosome, thereby stopping the translation
TraesCSC5B01G454700	TraesCS5B03G0848400	Chr5B	3296	9.3	10.2	8.4	4.3	8.4	6.9	7.9	0.3	0.1	0.2	0.7	1	0.1	0.1	0.2	0.2	0.2	0.2	0.2	0.2	0.2	3.62425e-05	0.278445	252.232	4.69783	0.281773	2.21527e-59	FAR1	- && - && -	EXO70H2 (exocyst subunit exo70 family protein H2) (Primary Symbol), ATEXO70H2 (EXOCYST SUBUNIT EXO70 FAMILY PROTEIN H2). Expressed in leaf apax, stamen, flowering stage.
TraesCSC6B01G088200	TraesCS6B03G0117800	Chr6B	2534	0.6	1.9	1.7	1.2	1	0.8	1.4	0.1	0	0	0.3	0.1	0.1	0.2	0	0.2	0	0	0	0.1	0	0.000447395	0.0444479	33.1887	2.79359	0.458353	6.00713e-08	CAMTA	TraesCS6B01G051000 && sp|Q9LPZ3|Y1141_ARATH G-type lectin S-receptor-like serine/threonine-protein kinase At1g11410 OS=Arabidopsis thaliana OX=3702 GN=At1g11410 PE=3 SV=3 && PF00069:Protein kinase domain|PF07714:Protein tyrosine kinase	Defense
TraesCSC4A01G154700	TraesCS4A03G0284700	Chr4A	1708	5.5	4.9	0.2	2.7	3.8	3.2	3.2	0	0	0.2	0.1	0.1	0.1	0	0.1	0	0.1	0.1	0	0	0.1	0.00218779	0.848304	83.4184	6.12949	1.04157	1.44154e-07	-	TraesCS4A01G132800 && - && PF00439:Bromodomain	protein that functions as an epigenetic "reader," recognizing and binding to acetylated lysine residues
TraesCSC2B01G134300	TraesCS2B03G0187900	Chr2B	2217	0.6	0.7	0.4	0.4	0.4	0.8	0.4	0.3	0.1	0.1	0.1	0.1	0.2	0.4	0.2	0.3	0.2	0.2	0.3	0.1	0.4	0.0085126	0.54369	14.3203	1.84776	0.528085	0.00556934	-	TraesCS2B01G083500 && sp|B8AX23|TAF1B_ORYSI TATA box-binding protein-associated factor RNA polymerase I subunit B OS=Oryza sativa subsp. indica OX=39946 GN=OsI_19584 PE=3 SV=1 && -	This complex is essential for the initiation of transcription of ribosomal RNA (rRNA) genes by RNA polymerase I (Pol I).
TraesCSC1A01G206400	TraesCS1A03G0399200	Chr1A	3633	0.6	0.8	0.5	0.3	0.3	0.1	0	0	0.1	0.1	0.1	0	0	0	0	0	0	0.1	0.1	0	0.1	0.0289282	0.395249	11.9861	2.85406	0.998294	0.0223262	-	TraesCS1A01G148100 && - && -	CYP705A1 (cytochrome P450, family 705, subfamily A, polypeptide 1) (Primary Symbol)
TraesCSC2D01G152500	TraesCS2D03G0210500	Chr2D	1882	0	0	0	0.1	0	0	0	0.2	0.3	0.3	0	0	0	0	0	0	0.1	0.2	0.5	0	0.2	0.00783817	0.284716	4.4398	-2.66576	0.873629	0.0201887	WOX	TraesCS2D01G099700 && - && PF07762:Protein of unknown function (DUF1618)	UDP-glucosyl transferase 71C2
TraesCSC3A01G670400	TraesCS3A03G1232500	Chr3A	3060	0.8	1.3	0	0.1	1.4	1.7	1.7	0	0	0	0	0	0	0	0	0	0	0	0	0	0	0.0101755	#DIV/0!	28.277	8.798	2.99411	4.62314e-05	WRKY	- && sp|Q9LMN7|WAK5_ARATH Wall-associated receptor kinase 5 OS=Arabidopsis thaliana OX=3702 GN=WAK5 PE=2 SV=1 && PF00069:Protein kinase domain|PF13947:Wall-associated receptor kinase galacturonan-binding	serine/threonine phosphorylation
TraesCSC7B01G184200	TraesCS7B03G0339500	Chr7B	4290	0.5	0.3	27.2	22.5	25.1	13.9	30.9	0	0	0	0	0	0	0	0	0	0	0	0	0	0	0.0112346	#DIV/0!	441.52	10.8605	1.82556	1.62223e-09	FAR1	TraesCS7B01G190900 && - && PF02902:Ulp1 protease family, C-terminal catalytic domain	This domain is characteristic of the C48 peptidase family and is primarily involved in processing and removing ubiquitin-like modifiers, most notably SUMO (Small Ubiquitin-like Modifier)
TraesCSC6B01G670500	TraesCS6B03G1223200	Chr6B	2952	0	0.1	0	0	0.3	0.1	0.1	1	0.5	1.6	0.6	0.3	0.8	0.6	0.9	1	0.5	0.2	0.5	0.4	1.4	0.0942577	0.413279	14.1496	-3.08633	0.635824	4.2924e-05	-	TraesCS6B01G437100 && - && -	FBXL (Primary Symbol). Encodes a F-box protein.
TraesCSC6B01G304000	TraesCS6B03G0493700	Chr6B	1283	0.4	0.7	1.2	1.4	0.6	0.8	1	0.1	0	0	0.1	0	0	1	1.8	1.9	1.6	0.2	0.5	1.3	0.4	0.000555151	0.519752	7.00647	3.8659	1.07772	0.015035	-	TraesCS6B01G191400 && sp|Q12063|UPPS_YEAST Dehydrodolichyl diphosphate synthase complex subunit NUS1 OS=Saccharomyces cerevisiae (strain ATCC 204508 / S288c) OX=559292 GN=NUS1 PE=1 SV=1 && -	It plays a critical role in the biosynthesis of dolichol, a vital lipid carrier for protein glycosylation.
TraesCSC3D01G222100	TraesCS3D03G0354700	Chr3D	1060	2.3	1.8	1	1	1.3	1.3	0.4	4.6	4.3	3.7	21.2	23.2	19.9	3.6	5.3	3.5	6.6	7	5.5	7.6	9.1	0.000350563	0.375599	49.3172	-1.8814	0.367982	1.18185e-05	Dof	TraesCS3D01G165300 && sp|Q94AU2|SEC22_ARATH 25.3 kDa vesicle transport protein OS=Arabidopsis thaliana OX=3702 GN=SEC22 PE=2 SV=1 && PF13774:Regulated-SNARE-like domain|PF00957:Synaptobrevin	Synaptobrevin family of SNARE proteins, which are crucial components of the machinery that mediates membrane fusion in eukaryotic cells. SEC22 is involved in the transport of vesicles from the endoplasmic reticulum (ER) to the Golgi apparatus
TraesCSC5D01G058900	TraesCS5D03G0110000	Chr5D	1009	1.7	1.8	2.5	2.3	3	2.6	1.6	0.6	1	1.2	1.7	0.9	1.3	0.7	0.7	0.7	0.7	0.9	1.2	0.3	0.6	0.00217175	0.249288	28.7599	1.21704	0.351836	0.00549831	-	TraesCS5D01G043700 && - && -	Probably not a gene
TraesCSC7D01G265900	TraesCS7D03G0404200	Chr7D	820	54.6	23.3	39.4	47.6	41	49.2	19.5	36.8	34.2	25.5	29.5	32.5	35.1	37	30.6	27.8	28.1	23.9	20.4	27.1	19.4	0.278224	0.00456042	143.218	1.81389	0.557731	0.00690007	GeBP	TraesCS7D01G179300 && sp|Q67X83|HS26M_ORYSJ 26.2 kDa heat shock protein, mitochondrial OS=Oryza sativa subsp. japonica OX=39947 GN=HSP26.2 PE=2 SV=1 && PF00011:Hsp20/alpha crystallin family	26.2 kDa mitochondrial small heat shock protein (sHSP). It prevents the irreversible aggregation of other proteins by binding to unfolding intermediates during heat stress
TraesCSC3B01G502100	TraesCS3D03G0715000	Chr3D	1084	2.4	1.8	2.8	2.1	2.6	3.3	1.9	2.8	0.4	0.2	2.2	2.1	2.7	3.1	1.5	1.1	1.1	0.7	0.5	2.7	0.4	0.261741	0.227978	82.463	1.33921	0.342172	0.0010938	-	TraesCS3D01G314700 && sp|F4JJJ3|NDB3_ARATH External alternative NAD(P)H-ubiquinone oxidoreductase B3, mitochondrial OS=Arabidopsis thaliana OX=3702 GN=NDB3 PE=2 SV=1 && PF07992:Pyridine nucleotide-disulphide oxidoreductase	Type II alternative NADH dehydrogenase. This protein is a key component of the plant mitochondrial electron transport chain
TraesCSC1B01G007000	TraesCS1B03G0010900	Chr1B	498	4.3	5.3	8.3	7	7.6	7	3.9	0.2	0.8	0	0.8	0	0	0.6	0.2	0	0.4	0	0.2	0	0.6	4.4406e-05	0.77203	18.7758	3.8723	0.622483	1.12905e-07	-	TraesCS1B01G005000 && - && PF02902:Ulp1 protease family, C-terminal catalytic domain	(Ubiquitin-like-specific protease 1) family members are crucial for the post-translational modification pathway involving SUMO
TraesCSC6B01G535300	TraesCS6B03G1001500	Chr6B	3495	7.2	5.7	9.1	6.3	8.3	9.5	9.7	4.8	4.2	3.9	5.2	4.6	4.8	3.8	4.3	4.8	4.2	4.1	3	3.3	4.5	0.000604479	0.0820406	340.405	1.04542	0.18609	6.44939e-07	-	TraesCS6B01G355400 && sp|Q9STN3|SPT51_ARATH Putative transcription elongation factor SPT5 homolog 1 OS=Arabidopsis thaliana OX=3702 GN=At4g08350 PE=1 SV=2 && PF11942:Spt5 transcription elongation factor, acidic N-terminal|PF03439:Early transcription elongation factor of RNA pol II, NGN section	Putative transcription elongation factor SPT5 homolog 1
TraesCSC1B01G448700	TraesCS1B03G0849800	Chr1B	1647	3.2	2.9	2.4	3.4	2.5	2.9	3.2	7.9	10.9	12	4.2	5.1	4.7	5	7.1	2.7	7.1	3.5	3.6	6.1	4.2	0.0254734	0.200704	140.399	-1.36034	0.315994	0.000382886	ERF	TraesCS1B01G308900 && sp|Q9SR86|AGT23_ARATH Alanine--glyoxylate aminotransferase 2 homolog 3, mitochondrial OS=Arabidopsis thaliana OX=3702 GN=At3g08860 PE=2 SV=1 && PF00202:Aminotransferase class-III	Amino acid metabolism, the response to osmotic stress, and nitrogen utilization
TraesCSC3B01G532100	TraesCS3D03G0758400	Chr3D	531	2.5	3	3.5	2.5	2.2	3.9	1.8	4.1	1.4	0.7	3.2	3.8	2.4	5	3.5	2.8	1.7	2.2	1.1	6.4	0.8	0.571189	0.640643	18.6893	1.42458	0.4192	0.00701875	-	TraesCS3D01G338900 && sp|P49216|RS26_ORYSJ 40S ribosomal protein S26 OS=Oryza sativa subsp. japonica OX=39947 GN=RPS26 PE=2 SV=2 && PF01283:Ribosomal protein S26e	Small ribosomal subunit protein eS26
TraesCSC4B01G021300	TraesCS4B03G0021200	Chr4B	1454	0.3	0.7	0.9	0.7	1	1	0.9	2.2	1.4	1.9	1.7	1.6	0.8	1.1	0.9	1.6	0.7	1.4	1.8	1.2	1.5	0.0313958	0.554607	40.0128	-1.1096	0.293665	0.0022283	HD-ZIP	- && sp|Q75ZG3|AFTS1_ALTAL Aldo-keto reductase AFTS1 OS=Alternaria alternata OX=5599 GN=AFTS1 PE=3 SV=1 && PF00248:Aldo/keto reductase family	Detoxification of harmful aldehydes and ketones
TraesCSC5A01G379200	TraesCS5A03G0738200	Chr5A	947	1.3	2.8	1.7	2.2	2.6	2	2.1	0.8	0.7	0.9	1.7	1.1	1.4	1.1	0.9	0.6	1.2	0.7	1.1	3.2	0.7	0.000355456	0.493555	30.5727	1.01638	0.334764	0.0152671	-	TraesCS5A01G302900 && sp|O04437|GSTZ_WHEAT Glutathione S-transferase OS=Triticum aestivum OX=4565 GN=GSTZ1 PE=1 SV=1 && PF13417:Glutathione S-transferase, N-terminal domain	GSTZ1 (glutathione S-transferase zeta 1) (Primary Symbol), GST18 (GLUTATHIONE S-TRANSFERASE 18), ATGSTZ1 (glutathione S-transferase zeta 1), ATMAAI, MAAI (MALEYLACETOACETATE ISOMERASE).
TraesCSC7A01G319600	TraesCS7A03G0548900	Chr7A	941	56.4	32.3	20.3	32	34.2	43.1	26.3	23.5	11.7	4.5	38.6	38.4	25.9	38.4	22.6	12.4	19.1	5.4	6.4	44.3	4.5	0.030141	0.386088	410.474	1.12164	0.478399	0.0478789	GeBP	TraesCS7A01G236700 && sp|Q6Z7V2|HS24M_ORYSJ 24.1 kDa heat shock protein, mitochondrial OS=Oryza sativa subsp. japonica OX=39947 GN=HSP24.1 PE=2 SV=1 && PF00011:Hsp20/alpha crystallin family	Heat shock protein
TraesCSC3A01G430300	TraesCS3A03G0812400	Chr3A	2023	1.1	1	1	0.3	0.8	0.3	1.1	0.3	0	0.1	1.5	2.4	0.3	0.6	0.1	0.5	0.5	0.2	0.6	0.4	0.3	0.00332961	0.396879	17.5773	1.83496	0.644827	0.0210716	-	TraesCS3A01G339700 && sp|Q9SYJ2|GPAT3_ARATH Probable glycerol-3-phosphate acyltransferase 3 OS=Arabidopsis thaliana OX=3702 GN=GPAT3 PE=2 SV=1 && PF01553:Acyltransferase	GPAT3 is part of a clade associated with mitochondria (membrane-bound forms GPAT1–3).
TraesCSC1B01G006900	TraesCS1B03G0011000	Chr1B	2931	5.4	5.7	8.6	6.2	8	6.3	8.6	0.2	0.3	0.2	0.2	0.1	0	0.2	0.1	0.5	0.3	0.3	0.1	0.2	0.1	1.28152e-05	1	205.407	5.1083	0.293602	4.62388e-64	FAR1	- && - && -	CPB (CAPPING PROTEIN B) (Primary Symbol), ATCPB
TraesCSC4D01G362300	TraesCS4D03G0632200	Chr4D	1851	5.7	3.9	5.7	6.5	3.7	5.7	4.5	2.5	2	1.3	5.6	4.7	2.7	5.1	2.7	2.5	2.5	2.1	2.1	4.3	1.5	0.000618841	0.312492	113.448	1.44167	0.219216	2.6781e-09	bHLH	TraesCS4D01G265800 && sp|O64411|PAO1_MAIZE Polyamine oxidase 1 OS=Zea mays OX=4577 GN=MPAO1 PE=1 SV=1 && PF01593:Flavin containing amine oxidoreductase	Flavoenzyme, meaning it uses flavin adenine dinucleotide (FAD) as a cofactor to catalyze the oxidative deamination of polyamines
TraesCSC7D01G785500	TraesCS7D03G1278600	Chr7D	4674	0.1	0.3	0.3	0.3	0.3	0.2	0.3	0.1	0.1	0	0.1	0.1	0.2	0.1	0.1	0.2	0.3	0.1	0.1	0.2	0	0.00693288	0.619419	14.6241	1.71474	0.506377	0.00733478	FAR1	TraesCS7D01G542200 && sp|Q9LRR4|R13L1_ARATH Putative disease resistance RPP13-like protein 1 OS=Arabidopsis thaliana OX=3702 GN=RPPL1 PE=3 SV=1 && PF00931:NB-ARC domain	Defense
TraesCSC6B01G013900	TraesCS6B03G0019200	Chr6B	2073	3	2	0.9	1	2.4	1.6	1.9	0.3	0.2	0.1	0.8	0.8	0.4	0.3	0.1	0.3	0.3	0.2	0.3	0.4	0.1	0.00100126	0.316321	56.8699	3.11706	0.434157	5.38952e-11	WRKY	- && sp|Q2R8L1|RGA5S_ORYSJ Disease resistance protein RGA5 OS=Oryza sativa subsp. japonica OX=39947 GN=RGA5 PE=2 SV=1 && PF18052:Rx N-terminal domain|PF00931:NB-ARC domain	Defense
TraesCSC7A01G252500	TraesCS7A03G0430400	Chr7A	823	0	0	0	0	0.1	0	0	6.1	6.6	6.1	6.9	2.7	4.7	4.8	7.9	9.8	4.7	7.5	6.5	5.3	5.8	0.000655235	0.798147	36.3116	-9.02742	1.31665	4.79009e-22	-	TraesCS7A01G184800 && - && -	Probably not a gene
TraesCSC2A01G124800	TraesCS2A03G0157600	Chr2A	3358	5.2	4.1	4.3	2.4	2.4	3.6	2.7	1.5	0.6	1	1.9	1.4	1.4	1.6	1.5	1	1.8	1.3	1.1	1.3	1.7	0.000881758	0.539467	114.246	1.50135	0.264664	4.81084e-07	FAR1	TraesCS2A01G080400 && - && PF11926:Domain of unknown function (DUF3444)	SDJ2 (SUVH1/3-interacting DNAJ domain-containing protein 2) (Primary Symbol), DNAJ2. The complex binds promoters with DNA methylation and mediates transcriptional activation of promoter methylated genes
TraesCSC1B01G304700	TraesCS1B03G0590400	Chr1B	1709	1	0.5	0.8	0.2	0.4	0.5	0.2	4.2	3.6	4.4	3.7	5.9	3.9	4.1	4.3	4.1	4.6	4	3.9	4.9	4	0.00103188	0.907706	46.3539	-2.86304	0.328331	6.71452e-16	-	TraesCS1B01G202000 && sp|Q1PF50|EDA2_ARATH Probable serine protease EDA2 OS=Arabidopsis thaliana OX=3702 GN=EDA2 PE=2 SV=2 && PF05577:Serine carboxypeptidase S28	EDA2 (embryo sac development arrest 2) (Primary Symbol). Serine carboxypeptidase S28 family protein;(source:Araport11). Expressed in the flowering stage.
TraesCSC3D01G354500	TraesCS3D03G0591600	Chr3D	1370	1.2	1	3.6	2.8	2.3	1.6	2.1	5.3	5.2	6.3	0	0	0	4.2	5.5	4.6	3	5	5.4	2.7	4.2	0.000408633	0.569493	59.6158	-1.19018	0.326783	0.00348807	-	- && sp|Q4KLQ5|WDR76_XENLA WD repeat-containing protein 76 OS=Xenopus laevis OX=8355 GN=wdr76 PE=2 SV=1 && -	RNase H-like domain found in reverse transcriptase (RT_RNaseH)
TraesCSC5B01G171300	TraesCS5B03G0322000	Chr5B	716	1	0.5	0.5	1.1	0.4	0.7	0.8	0	0	0.2	0	0	0.2	0.3	0.1	0.2	0.1	0.2	0.3	0	0.2	0.000720374	0.466329	5.92729	3.05755	0.950186	0.0253792	MYB	- && sp|A2WWV5|ERG1_ORYSI Elicitor-responsive protein 1 OS=Oryza sativa subsp. indica OX=39946 GN=ERG1 PE=2 SV=2 && PF00168:C2 domain	Defence. ERG1 is an elicitor-responsive gene.
TraesCSC6D01G275700	TraesCS6D03G0393000	Chr6D	3498	0.5	0.2	0.4	0.3	0.4	0.2	0.7	0.1	0	0.2	0.3	0.1	0.2	0.1	0	0.1	0.1	0.1	0.1	0.2	0.1	0.0148393	0.954428	16.1456	1.58991	0.549732	0.0204318	ERF	TraesCS6D01G174300 && sp|O49545|BAME1_ARATH Leucine-rich repeat receptor-like serine/threonine-protein kinase BAM1 OS=Arabidopsis thaliana OX=3702 GN=BAM1 PE=1 SV=1 && PF13855:Leucine rich repeat|PF07714:Protein tyrosine kinase	BARELY ANY MERISTEM 1) is a leucine-rich repeat receptor-like serine/threonine-protein kinase (LRR-RLK).
TraesCSC1D01G383600	TraesCS1D03G0681700	Chr1D	201	1	3.9	33.4	36.4	17.9	17	13.3	0	0.1	0	0	0	0	0	0	0	0	0	0.1	0	0	0.0136765	0.709973	84.0148	6.70631	1.1609	4.05843e-07	-	TraesCS1D01G284300 && sp|A2WWU2|H2B11_ORYSI Histone H2B.11 OS=Oryza sativa subsp. indica OX=39946 GN=H2B.11 PE=3 SV=1 && PF00125:Core histone H2A/H2B/H3/H4	Histone 2B
TraesCSC1A01G240500	TraesCS1A03G0473200	Chr1A	2102	0.4	1.2	0.7	0.8	0.5	0.4	0.2	0.2	0.1	0	0.3	0.3	0.1	0.2	0.1	0.1	0.5	0	0.1	0.2	0.1	0.00710091	0.801446	14.7433	2.67919	0.730761	0.00321051	-	TraesCS1A01G175500 && - && -	LTI65 (LOW-TEMPERATURE-INDUCED 65) (Primary Symbol), RD29B (RESPONSIVE TO DESICCATION 29B)
TraesCSC7A01G630600	TraesCS7A03G1140400	Chr7A	2457	0	0.1	0.5	0.4	0.4	0.1	0.4	0	0	0	0	0.2	0	0	0	0.1	0	0	0	0.3	0	0.0109104	0.695423	5.52231	6.05787	2.49133	0.0010938	WRKY	TraesCS7A01G470600 && sp|C0LGP4|Y3475_ARATH Probable LRR receptor-like serine/threonine-protein kinase At3g47570 OS=Arabidopsis thaliana OX=3702 GN=At3g47570 PE=2 SV=1 && PF07714:Protein tyrosine kinase	serine/threonine phosphorylation
TraesCSC4D01G384200	TraesCS4D03G0667200	Chr4D	1635	0.4	0.6	0.5	0.3	0.6	0.4	0.5	0.1	0	0.2	0.5	0.6	0.4	0.3	0.3	0.2	0.3	0.2	0.2	0.6	0.3	0.00539157	0.755381	9.13102	1.88819	0.641574	0.0231796	M-type_MADS	TraesCS4D01G281500 && - && -	Unknown protein
TraesCSC4B01G510800	TraesCS4B03G0909000	Chr4B	1281	1.1	1.5	0	0.9	0.5	0.2	0.8	0	0	0	0	0	0	0	0	0	0	0	0	0	0	0.0109996	#DIV/0!	14.3248	4.37557	1.14656	0.00328179	GATA	- && sp|F4JCU3|MVD2_ARATH Diphosphomevalonate decarboxylase MVD2, peroxisomal OS=Arabidopsis thaliana OX=3702 GN=MVD2 PE=1 SV=1 && PF18376:Mevalonate 5-diphosphate decarboxylase C-terminal domain	ATP-dependent decarboxylation of (R)-5-diphosphomevalonate (MVAPP) to form isopentenyl diphosphate (IPP). A critical step in the mevalonate (MVA) pathway, which leads to the production of sterols and terpenoids
TraesCSC2B01G798500	TraesCS2B03G1391500	Chr2B	942	4.6	3	1	0.9	3	3.6	5.9	0.6	0.7	1.5	1.4	1.6	2.1	0.7	2.2	1.1	1.2	1.2	1.1	2.4	1.3	0.0185582	0.715325	43.2673	1.55205	0.505146	0.0117576	ERF	TraesCS2B01G554500 && sp|Q5W6R4|DRE2B_ORYSJ Dehydration-responsive element-binding protein 2B OS=Oryza sativa subsp. japonica OX=39947 GN=DREB2B PE=2 SV=2 && -	Transcription factor. Dehydration-Responsive Element-Binding protein 2B
TraesCSC3D01G220800	TraesCS3D03G0352300	Chr3D	1195	1.7	3.1	2.2	3.1	3.3	4.2	3.8	2	1.2	1.3	0.1	0	0.1	1.8	2.1	1	1.5	1.1	0.9	1.7	0.6	0.00626306	0.789443	57.2591	1.07307	0.356496	0.0146502	-	TraesCS3D01G164100 && - && PF07762:Protein of unknown function (DUF1618)	Protein of unknown function
TraesCSC1B01G280600		Chr7A	1137																								93.8357	8.7686	1.3784	6.13235e-12	-	TraesCS7A01G063800 && - && -	TOC132 (MULTIMERIC TRANSLOCON COMPLEX IN THE OUTER ENVELOPE MEMBRANE 132) (Primary Symbol), ATTOC132 (MULTIMERIC TRANSLOCON COMPLEX IN THE OUTER ENVELOPE MEMBRANE 132), AIC1 (ARSENATE INDUCED CHLOROSIS 1)
TraesCSC2B01G848000	TraesCS2B03G1466000	Chr2B	2913	1.1	1.4	1.9	2.2	0.6	1.8	0.9	0.2	0.1	0.2	0.1	0.1	0.3	0.3	0.3	0.2	0.3	0.2	0.2	0.2	0.2	0.0011766	0.579529	41.3853	3.10136	0.432328	6.63631e-11	TCP	TraesCS2B01G585900 && - && PF04578:Protein of unknown function, DUF594|PF13968:Domain of unknown function (DUF4220)	Transmembrane protein, putative (DUF594);(source:Araport11)
TraesCSC6D01G332100	TraesCS6D03G0517000	Chr6D	2779	0.9	0.4	0.5	0.7	0.6	1	0.5	0.5	0.1	0	1	0.9	0.7	0.6	0.3	0.4	0.7	0.2	0.3	0.6	0.2	0.0715827	0.529775	23.5863	1.35672	0.50972	0.0306642	G2-like	TraesCS6D01G208400 && sp|Q8W595|SUVR4_ARATH Histone-lysine N-methyltransferase SUVR4 OS=Arabidopsis thaliana OX=3702 GN=SUVR4 PE=1 SV=2 && PF05033:Pre-SET motif|PF00856:SET domain|PF10440:Ubiquitin-binding WIYLD domain	SUVR4 localizes primarily to the nucleolus and is involved in transcriptional gene silencing. By converting H3K9me1 to the repressive H3K9me3 mark, it facilitates the silencing of transposable elements and repeat sequences
TraesCSC7A01G659300	TraesCS7A03G1191900	Chr7A	1720	0.5	0.9	1.3	0.9	1.3	0.7	0.7	1.8	2.5	2.9	4.4	0.5	1.5	0.7	2.3	5.3	2.7	3.2	2.3	1.7	2.6	0.0307437	0.911521	39.7066	-1.1831	0.302389	0.00142442	NAC	TraesCS7A01G492000 && sp|Q8GW96|AATP3_ARATH AAA-ATPase At2g18193 OS=Arabidopsis thaliana OX=3702 GN=At2g18193 PE=2 SV=1 && PF14363:Domain associated at C-terminal with AAA|PF00004:ATPase family associated with various cellular activities (AAA)	Response to salt stress.
TraesCSC5B01G240700	TraesCS5B03G0455800	Chr5B	850	0.2	1.8	0.8	1.1	0.5	0.2	0.5	2.2	4.8	5	0.2	0.2	0	1.4	6.6	1.4	8	2.6	1.8	0.4	1.4	0.061048	0.797254	20.3758	-1.86164	0.602039	0.0164714	-	TraesCS5B01G169100 && - && -	HIPP47 (HEAVY METAL-ASSOCIATED ISOPRENYLATED PLANT PROTEIN 47)
TraesCSC7A01G028400	TraesCS7A03G0044500	Chr7A	2834	3.5	3.2	2.5	2.5	1.8	2.1	2.6	0.1	0.1	0	0.2	0.4	0.2	0.2	0.1	0.2	0.3	0.1	0.1	0.2	0.1	2.18012e-05	0.905328	74.8632	4.35747	0.390742	7.37382e-26	MYB	- && sp|F7J0N2|RGA5R_ORYSJ Disease resistance protein RGA5 OS=Oryza sativa subsp. japonica OX=39947 GN=RGA5 PE=1 SV=1 && PF12313:NPR1/NIM1 like defence protein C terminal	Defense
TraesCSC6A01G549800	TraesCS6A03G1028300	Chr6A	3953	1.8	1.7	2.2	1.9	1.9	1.8	2.4	0.7	1	1	1.8	1.1	1.2	1.3	0.7	0.9	1.1	1.1	1	0.6	1.3	0.000333462	0.727796	106.9	1.02522	0.181588	6.3086e-07	WRKY	TraesCS6A01G411800 && sp|Q2QZF1|PIK6_ORYSJ Disease resistance protein PIK6-NP OS=Oryza sativa subsp. japonica OX=39947 GN=PIK6-NP PE=2 SV=1 && -	Defense
TraesCSC7A01G028300	TraesCS7A03G0044400	Chr7A	4033	6.5	8	4.9	7.8	4.1	3.8	5.3	0.3	0.6	0	0.6	0.8	0.5	0.4	0.2	0.3	0.7	0.2	0.3	0.6	0.3	8.88369e-05	0.945324	254.594	3.54342	0.579506	2.70346e-08	WRKY	- && sp|F7J0M6|RGA4S_ORYSJ Disease resistance protein RGA4 OS=Oryza sativa subsp. japonica OX=39947 GN=RGA4 PE=2 SV=1 && PF00931:NB-ARC domain|PF18052:Rx N-terminal domain	Defense
TraesCSC4A01G225400		Chr4A	1035																								38.5966	2.8958	0.418939	4.34772e-10	FAR1	TraesCS4A01G182200 && sp|Q8RYJ8|CML19_ORYSJ Putative calcium-binding protein CML19 OS=Oryza sativa subsp. japonica OX=39947 GN=CML19 PE=3 SV=1 && PF13833:EF-hand domain pair	Calcium signaling pathways
TraesCSC7D01G489600	TraesCS7D03G0807500	Chr7D	2187	1.9	1.4	1.2	1.4	1.4	1.7	1.2	3	4.3	5.6	4.2	2.3	4.2	2.9	3.4	4.4	4.3	3.3	4.1	2.3	5.3	0.0608978	0.937615	89.2112	-1.54477	0.199231	1.13077e-12	bHLH	- && sp|Q8VY09|DJ1C_ARATH Protein DJ-1 homolog C OS=Arabidopsis thaliana OX=3702 GN=DJ1C PE=2 SV=1 && PF01965:DJ-1/PfpI family	An atypical member of the DJ-1 superfamily that is essential for chloroplast development and viability
TraesCSC1B01G146900	TraesCS1B03G0249200	Chr1B	3399	0.2	0.1	0.2	0.4	0.3	0.3	0.6	0	0.2	0.2	0.2	0	0.1	0.2	0.1	0.1	0.1	0.1	0.1	0.5	0.1	0.120322	0.525469	278.924	5.64611	0.681605	7.86213e-15	GRAS	TraesCS1B01G093800 && sp|O65405|CRK28_ARATH Cysteine-rich receptor-like protein kinase 28 OS=Arabidopsis thaliana OX=3702 GN=CRK28 PE=3 SV=2 && PF00069:Protein kinase domain	Cysteine-rich Receptor-like Protein Kinase 28. CRK28 modulates root organogenesis.
TraesCSC3D01G622900	TraesCS3D03G1009100	Chr3D	3348	27.5	13.8	25	14.7	15	18.1	14	6.4	4.3	8.8	8.2	10.3	13.6	10.8	11.4	9.2	10.2	9.3	6.6	4.5	10.7	0.0015219	0.535999	524.969	1.51075	0.307874	1.86305e-05	-	TraesCS3D01G458600 && sp|P36428|SYA_ARATH Alanine--tRNA ligase OS=Arabidopsis thaliana OX=3702 GN=ALATS PE=1 SV=3 && -	Attachment of the amino acid L-alanine to its corresponding transfer RNA (tRNA) molecule, specifically tRNA(Ala), in an ATP-dependent reaction.
TraesCSC7D01G047600	TraesCS7D03G0071000	Chr7D	1568	0.1	0.3	0.4	0.8	0.3	0.3	0.1	0	0	0	0	0	0	0	0.1	0	0.1	0	0	0	0	0.0102946	0.709973	5.07964	4.01893	1.42581	0.0154328	-	TraesCS7D01G031200 && - && -	ATFDA17 (F-BOX/DUF295 ANCESTRAL 17) (Primary Symbol). F-box SKIP23-like protein (DUF295);(source:Araport11).
TraesCSC5B01G123400	TraesCS5B03G0218900	Chr5B	2990	0.5	0.3	0.5	0.1	0.4	0.4	0.4	1.1	1.9	1.7	1	1	1.4	1.3	1.1	1.5	1.7	1.1	1.1	0.9	1.4	0.0331161	0.609461	37.1119	-1.85807	0.300622	3.94107e-08	MYB	TraesCS5B01G087300 && sp|F4HSD5|TRM32_ARATH Protein TRM32 OS=Arabidopsis thaliana OX=3702 GN=TRM32 PE=2 SV=1 && PF14309:Domain of unknown function (DUF4378)|PF12552:Protein of unknown function (DUF3741)	Target promoter of the male germline-specific transcription factor DUO1
TraesCSC2A01G420500	TraesCS2A03G0736200	Chr2A	1877	3.2	1.6	3.7	1.9	2.7	3.3	2.5	0	0	0	0.3	0.2	0.2	0.1	0.2	0.1	0.2	0.2	0	0	0.1	8.4701e-05	0.708924	49.8385	6.13449	0.738083	3.45652e-13	M-type_MADS	- && sp|Q9LZB8|AB29B_ARATH ABC transporter B family member 29, chloroplastic OS=Arabidopsis thaliana OX=3702 GN=ABCB29 PE=1 SV=1 && PF00005:ABC transporter|PF00664:ABC transporter transmembrane region	ABC transporter B family member 29, It is a protein located in the chloroplast and functions as an ATP-binding cassette (ABC) transporter
TraesCSC5B01G008600	TraesCS5B03G0015500	Chr5B	1509	2.3	2.9	1.5	2.2	1.1	2	1.2	0.7	0.5	0.4	0.3	0.2	0.3	0.6	0.6	1.2	0.7	0.5	0.4	0.2	0.4	0.00114917	0.482955	41.6833	1.90244	0.363081	5.02184e-06	bHLH	TraesCS5B01G006800 && - && -	DEG14 (DEGRADATION OF PERIPLASMIC PROTEINS 14) (Primary Symbol), ATPARK13 (ARABIDOPSIS PARK13 HOMOLOG), PARK13. DEG14 is induced by heat stress and involved in degradation of misfolded proteins.
TraesCSC5D01G092400	TraesCS5D03G0168900	Chr5D	1381	1.9	1.9	1	2.5	2.8	2.5	0.8	1	0.2	0.1	2	1	1.3	1.7	1	0.3	1.1	0.2	0.1	2.7	0	0.0104694	0.815833	26.371	2.07997	0.569048	0.00260402	-	TraesCS5D01G069100 && - && -	CRK11 (cysteine-rich RLK (RECEPTOR-like protein kinase) 11) (Primary Symbol)
TraesCSC7A01G054200	TraesCS7A03G0086200	Chr7A	3531	3.5	3.4	4.3	4.8	3.3	3	3	1.3	2.1	2	2.5	3.2	1.8	1.7	1.5	1	2.5	1.7	1.4	2	1.2	0.00220829	0.66851	61.8297	1.00392	0.264669	0.00186407	Whirly	TraesCS7A01G039600 && - && -	Defense
TraesCSC3A01G551900	TraesCS3A03G1031000	Chr3A	1462	2.4	1.3	2.6	3.1	1.4	1.8	1.2	0.6	0.1	0.5	0.2	0.5	0.3	0.2	0	0	0.6	0.2	0.1	0.3	0.1	0.00112818	0.956544	33.1792	2.26105	0.435492	5.8938e-06	-	- && - && -	AGAL2 (alpha-galactosidase 2) (Primary Symbol), AtAGAL2 (alpha-galactosidase 2), expressed in floral parts.
TraesCSC1D01G503800	TraesCS1D03G0882400	Chr1D	1523	0.1	0.5	1.7	2.4	0.5	1.3	0.9	0.1	0.1	0.1	0.3	0.1	0.1	0.1	0.1	0	0	0.3	0	0	0.2	0.0194014	0.876873	15.3724	2.66401	0.79954	0.00723657	-	TraesCS1D01G379100 && - && PF03372:Endonuclease/Exonuclease/phosphatase family	Pfam identifier for the Endonuclease/exonuclease/phosphatase family
TraesCSC5A01G268000	TraesCS5A03G0540800	Chr5A	1705	0.7	0.6	0.8	0.4	0.4	0.5	1	0.1	0.2	0.2	0.4	0.1	0.2	0.5	0.4	0.3	0.3	0.2	0.2	0.4	0.2	0.0011042	0.915968	12.8173	1.62156	0.541501	0.0187551	BES1	TraesCS5A01G208400 && sp|Q84W80|FBL42_ARATH F-box/LRR-repeat protein At3g03360 OS=Arabidopsis thaliana OX=3702 GN=At3g03360 PE=2 SV=2 && -	FBL42 is a component of the SCF (Skp1-Cullin-F-box) E3 ubiquitin ligase complex
TraesCSC2D01G350100	TraesCS2D03G0529400	Chr2D	546	0	1.3	2.8	2.6	2.4	2.6	2.1	0	0	0	0	0	0	0	0	0	0	0	0	0	0	0.00199597	#DIV/0!	14.7793	7.86571	2.6968	5.43499e-06	-	TraesCS2D01G240100 && - && -	Hypothetical protein
TraesCSC3A01G659300	TraesCS3A03G1217500	Chr3A	1599	0.3	0	9.3	6.5	7.9	9.6	12.3	0	0	0	0	0	0	0	0	0	0	0	0	0	0	0.0103935	#DIV/0!	105.178	10.9314	3.31087	2.65786e-06	NF-YC	TraesCS3A01G517000 && - && PF12776:Myb/SANT-like DNA-binding domain	Transcription factor (TF)

## Sheet: Readme
To compute log2FoldChange and adjusted p-values (padj) we used acutal numbers of RNA-Seq reads mapped to CS-CAU genome sequence. As those data were not adjusted for sequencing depth and the gene length, we mapped the RNA-Seq reads to CS IWGSC RefSeq v2.1 and computed fragments per kilobase of transcript per million mapped reads (FPKM) and used those data to compute the t-test values. Thus, RNA-Se…
Genes in red were annotated with a cell wall related genes among the 145 DEGs with significant padj in the CRISPR vs DS2D5. Genes in yellow are the 15 genes with significant padj in both CRISPR vs DS2D5 and DS vs CS comparisons (see Results).
