# Supplementary material
Source: Research Square preprint supplement (doi:10.21203/rs.3.rs-9315249/v1)
Supplement: Supplementary file 8 [file 91b3ad36d2eb3dc36299d8d4.xlsx]

## Sheet: Data
Supplementary Data 7. Tg-D1 haplotypes detected in Ae. tauschii and T. aestivum accessions. The type of mutation (synonymous, missence, or frameshift) for each polymorphic position is indicated in row 2. Bases identical to those in the CS reference sequence are in green cells and variant bases in cells with other colors. Bases are specified by letters and the numbers of simple sequence repeats (S…
						synonymous	missense	synonymous	synonymous	synonymous	missense	synonymous	synonymous	synonymous	synonymous	missense	synonymous	missense	synonymous	synonymous	synonymous	missense	synonymous	synonymous	frameshift	synonymous	synonymous
Species	Ploidy	Type of accession	Accession	Data source	Origin (country, province)	60-77 bp	125 bp	376-390 bp	402 bp	480 bp	532 bp	522-542 bp	846 bp	1086 bp	1152 bp	1247 bp	1320 bp	1397 bp	1449 bp	1467 bp	1491 bp	1570 bp	1602 bp	1617 bp	1649-1650 bp	2076 bp	2418 bp
Aegilops tauschii	Diploid	Wild species	TA10930	1	Georgia	3/4	C	5	G	C	T	7	C	C	C	C	C	G	C	C	T	G	C	G	CG	G	C
Aegilops tauschii	Diploid	Wild species	TA1684	1	Azerbaijan	3/4	C	5	G	C	T	7	C	C	C	C	C	G	C	C	T	G	C	G	CG	G	C
Aegilops tauschii	Diploid	Wild species	TA10931	1	Georgia	4	C	5	G	C	G	7	C	C	C	C	C	G	C	C	T	G	C	G	CG	G	C
Aegilops tauschii	Diploid	Wild species	ENT382-1	1	Turkey	3/4	C	5	G	C	G	7	C	C	C	C	C	G	C	C	T	G	C	G	CG	G	C
Aegilops tauschii	Diploid	Wild species	ENT383	1	Turkey	3/4	C	5	G	C	G	7	C	C	C	C	C	G	C	C	T	G	C	G	CG	G	C
Aegilops tauschii	Diploid	Wild species	TA10944	1	Azerbaijan	3/4	C	5	G	C	G	7	C	C	C	C	C	G	C	C	T	G	C	G	CG	G	C
Aegilops tauschii	Diploid	Wild species	TA1585	1	Turkey, Hakkari	3/4	C	5	G	C	G	7	C	C	C	C	C	G	C	C	T	G	C	G	CG	G	C
Aegilops tauschii	Diploid	Wild species	TA2527	1	Iran, Mazandaran	3/4	C	5	G	C	G	7	C	C	C	C	C	G	C	C	T	G	C	G	CG	G	C
Aegilops tauschii	Diploid	Wild species	TA2528	1	Iran, Mazandaran	3/4	C	5	G	C	G	7	C	C	C	C	C	G	C	C	T	G	C	G	CG	G	C
Aegilops tauschii	Diploid	Wild species	TA2452	1	Iran	3	T	5	T	T	G	7/4	C	C	G	C	C	G	C	C	T	G	C	G	CG	G	C
Aegilops tauschii	Diploid	Wild species	TA2454	1	Iran	3	T	5	G/T	C/T	NA	4	C	C	G	C	C	G	C	C	T	G	C	G	CG	G	C
Aegilops tauschii	Diploid	Wild species	ENT078-1	1	Iran, Golestan	3	T	5	T	C	NA	4	C	C	G	C	C	G	C	C	T	G	C	G	CG	G	C
Aegilops tauschii	Diploid	Wild species	TA2449	1	Iran, Mazandaran	3	T	5	T	C	NA	4	C	C	G	C	C	G	C	C	T	G	C	G	CG	G	C
Aegilops tauschii	Diploid	Wild species	TA2453	1	Iran	3	T	5	G/T	C	G	4	C	C	G	C	C	G	C	C	T	G	C	G	CG	G	C
Aegilops tauschii	Diploid	Wild species	ENT077	1	Iran, Mazandaran	3	T	5	T	C	G	7/4	C	C	G	C	C	G	C	C	T	G	C	G	CG	G	C
Aegilops tauschii	Diploid	Wild species	ENT080	1	Iran, Golestan	3	T	5	T	C	G	7/4	C	C	G	C	C	G	C	C	T	G	C	G	CG	G	C
Aegilops tauschii	Diploid	Wild species	TA1644	1	Iran, Aliabad	3	T	5	T	C	G	7/4	C	C	G	C	C	G	C	C	T	G	C	G	CG	G	C
Aegilops tauschii	Diploid	Wild species	TA1651	1	Iran, Golestan	3	T	5	T	C	G	7/4	C	C	G	C	C	G	C	C	T	G	C	G	CG	G	C
Aegilops tauschii	Diploid	Wild species	ENT081	1	Iran, Golestan	3	T	5	G/T	C	G	7/4	C	C	G	C	C	G	C	C	T	G	C	G	CG	G	C
Aegilops tauschii	Diploid	Wild species	TA1605	1	NA	3	T	5	G/T	C	G	7/4	C	C	G	C	C	G	C	C	T	G	C	G	CG	G	C
Aegilops tauschii	Diploid	Wild species	TA1612	1	Former USSR	3	T	5	G	C	NA	4	C	C	G	C	C	G	C	C	T	G	C	G	CG	T	C
Aegilops tauschii	Diploid	Wild species	TA2466	1	Iran, Mazandaran	3	T	5	G	C	NA	7/4	C	C	G	C	C	G	C	C	T	G	C	G	CG	T	C
Aegilops tauschii	Diploid	Wild species	TA1643	1	Iran, Hamadan	3	T	5	G	C	G	7/4	C	C	G	C	C	G	C	C	T	G	C	G	CG	T	C
Aegilops tauschii	Diploid	Wild species	TA2568	1	Armenia	3	T	5	G	C	G	7/4	C	C	G	C	C	G	C	C	T	G	C	G	CG	T	C
Aegilops tauschii	Diploid	Wild species	TA10417	1	NA	3	T	5	G	C	NA	4	C	C	G	C	C	G	C	C	T	G	C	G	CG	G	G
Aegilops tauschii	Diploid	Wild species	TA1613	1	Russian Federation	3	T	5	G	C	NA	7/4	C	C	G	C	C	G	C	C	T	G	C	G	CG	G	G
Aegilops tauschii	Diploid	Wild species	TA2377	1	Iran, Mazandaran	3	T	5	G	C	G	7/4	C	C	G	C	C	G	C	C	T	G	C	G	CG	G	G
Aegilops tauschii	Diploid	Wild species	ENT242	1	Turkmenistan	3	T	5	G	C	G	7/4	C	C	G	T	C	G	C	C	T	G	C	G	CG	G	C
Aegilops tauschii	Diploid	Wild species	TA2460	1	Iran, Golestan	3	T	5	G	C	G	7/4	C	C	G	T	C	G	C	C	T	G	C	G	CG	G	C
Aegilops tauschii	Diploid	Wild species	TA2459	1	Iran, Golestan	3	T	5	G	C	G	7/4	C	C	G	C/T	C	G	C	C	T	G	C	G	CG	G	C
Aegilops tauschii	Diploid	Wild species	TA1641	1	Iran, Mazandaran	3	T	5	G	C	G	7/4	C	C	G	C	C	G	C	C	T	G	C	G	CG	G	C
Aegilops tauschii	Diploid	Wild species	TA1606	1	Iran	3	T	5	G	C	G	7/4	C	C	G	C	C	G	C	C	T	G	C	G	CG	G	C
Aegilops tauschii	Diploid	Wild species	TA1645	1	Iran, Mazandaran	3	T	5	G	C	G	7/4	C	C	G	C	C	G	C	C	T	G	C	G	CG	G	C
Aegilops tauschii	Diploid	Wild species	TA1695	1	NA	3	T	5	G	C	G	7/4	C	C	G	C	C	G	C	C	T	G	C	G	CG	G	C
Aegilops tauschii	Diploid	Wild species	TA2457	1	Iran, Golestan	3	T	5	G	C	G	7/4	C	C	G	C	C	G	C	C	T	G	C	G	CG	G	C
Aegilops tauschii	Diploid	Wild species	TA2451	1	Iran, Mazandaran	3	C/T	5	G	C	G	7/4	C	C	G	C	C	G	C	C	T	G	C	G	CG	G	C
Aegilops tauschii	Diploid	Wild species	TA2465	1	Iran, Mazandaran	3	C	5/7	G	C	G	7	C	C	G	C	C	G	C	C	T	G	C	G	CG	G	C
Aegilops tauschii	Diploid	Wild species	TA2469	1	Iran, Mazandaran	3	C	5/7	G	C	G	7	C	C	G	C	C	G	C	C	T	G	C	G	CG	G	C
Aegilops tauschii	Diploid	Wild species	ENT085	1	Iran, Mazandaran	3	C	5/7	G	C	G	7	C	C	G	C	C	G	C	C	T	G	C	G	CG	G	C
Aegilops tauschii	Diploid	Wild species	ENT125	1	Azerbaijan, Agsu	3	C	5/7	G	C	G	7	C	C	G	C	C	G	C	C	T	G	C	G	CG	G	C
Aegilops tauschii	Diploid	Wild species	TA2467	1	Iran, Mazandaran	3	C	5/7	G	C	G	7	C	C	G	C	C	G	C	C	T	G	C	G	CG	G	C
Aegilops tauschii	Diploid	Wild species	TA1679	1	Azerbaijan, Shamakhi	3	C	5/4	G	C	G	7	C	C	G	C	C	G	C	C	T	G	C	G	CG	G	C
Aegilops tauschii	Diploid	Wild species	TA10942	1	Azerbaijan	3/2	C	5	G	C	G	7	C	C	G	C	C	G	C	C	T	G	C	G	CG	G	C
Aegilops tauschii	Diploid	Wild species	ENT126	1	Azerbaijan, Askeran	3	C	5	G	C	G	7	C	C	G	C	C	G	C	C	T	G	C	G	CG	G	C
Aegilops tauschii	Diploid	Wild species	ENT148	1	Azerbaijan	3	C	5	G	C	G	7	C	C	G	C	C	G	C	C	T	G	C	G	CG	G	C
Aegilops tauschii	Diploid	Wild species	ENT152	1	Azerbaijan	3	C	5	G	C	G	7	C	C	G	C	C	G	C	C	T	G	C	G	CG	G	C
Aegilops tauschii	Diploid	Wild species	ENT183	1	Azerbaijan	3	C	5	G	C	G	7	C	C	G	C	C	G	C	C	T	G	C	G	CG	G	C
Aegilops tauschii	Diploid	Wild species	ENT184	1	Azerbaijan	3	C	5	G	C	G	7	C	C	G	C	C	G	C	C	T	G	C	G	CG	G	C
Aegilops tauschii	Diploid	Wild species	ENT193	1	Azerbaijan	3	C	5	G	C	G	7	C	C	G	C	C	G	C	C	T	G	C	G	CG	G	C
Aegilops tauschii	Diploid	Wild species	ENT195	1	Azerbaijan	3	C	5	G	C	G	7	C	C	G	C	C	G	C	C	T	G	C	G	CG	G	C
Aegilops tauschii	Diploid	Wild species	ENT212	1	Turkmenistan	3	C	5	G	C	G	7	C	C	G	C	C	G	C	C	T	G	C	G	CG	G	C
Aegilops tauschii	Diploid	Wild species	ENT226	1	Armenia	3	C	5	G	C	G	7	C	C	G	C	C	G	C	C	T	G	C	G	CG	G	C
Aegilops tauschii	Diploid	Wild species	ENT255	1	Armenia	3	C	5	G	C	G	7	C	C	G	C	C	G	C	C	T	G	C	G	CG	G	C
Aegilops tauschii	Diploid	Wild species	ENT352	1	Russia	3	C	5	G	C	G	7	C	C	G	C	C	G	C	C	T	G	C	G	CG	G	C
Aegilops tauschii	Diploid	Wild species	TA10091	1	Azerbaijan	3	C	5	G	C	G	7	C	C	G	C	C	G	C	C	T	G	C	G	CG	G	C
Aegilops tauschii	Diploid	Wild species	TA10093	1	Azerbaijan	3	C	5	G	C	G	7	C	C	G	C	C	G	C	C	T	G	C	G	CG	G	C
Aegilops tauschii	Diploid	Wild species	TA10094	1	Azerbaijan	3	C	5	G	C	G	7	C	C	G	C	C	G	C	C	T	G	C	G	CG	G	C
Aegilops tauschii	Diploid	Wild species	TA10095	1	Armenia	3	C	5	G	C	G	7	C	C	G	C	C	G	C	C	T	G	C	G	CG	G	C
Aegilops tauschii	Diploid	Wild species	TA10098	1	Armenia	3	C	5	G	C	G	7	C	C	G	C	C	G	C	C	T	G	C	G	CG	G	C
Aegilops tauschii	Diploid	Wild species	TA10919	1	Georgia	3	C	5	G	C	G	7	C	C	G	C	C	G	C	C	T	G	C	G	CG	G	C
Aegilops tauschii	Diploid	Wild species	TA10921	1	Georgia	3	C	5	G	C	G	7	C	C	G	C	C	G	C	C	T	G	C	G	CG	G	C
Aegilops tauschii	Diploid	Wild species	TA10933	1	Azerbaijan	3	C	5	G	C	G	7	C	C	G	C	C	G	C	C	T	G	C	G	CG	G	C
Aegilops tauschii	Diploid	Wild species	TA10935	1	Azerbaijan	3	C	5	G	C	G	7	C	C	G	C	C	G	C	C	T	G	C	G	CG	G	C
Aegilops tauschii	Diploid	Wild species	TA10936	1	Azerbaijan, Saatly	3	C	5	G	C	G	7	C	C	G	C	C	G	C	C	T	G	C	G	CG	G	C
Aegilops tauschii	Diploid	Wild species	TA10939	1	Azerbaijan	3	C	5	G	C	G	7	C	C	G	C	C	G	C	C	T	G	C	G	CG	G	C
Aegilops tauschii	Diploid	Wild species	TA10940	1	Azerbaijan	3	C	5	G	C	G	7	C	C	G	C	C	G	C	C	T	G	C	G	CG	G	C
Aegilops tauschii	Diploid	Wild species	TA10946	1	Azerbaijan	3	C	5	G	C	G	7	C	C	G	C	C	G	C	C	T	G	C	G	CG	G	C
Aegilops tauschii	Diploid	Wild species	TA10947	1	Azerbaijan	3	C	5	G	C	G	7	C	C	G	C	C	G	C	C	T	G	C	G	CG	G	C
Aegilops tauschii	Diploid	Wild species	TA10948	1	Azerbaijan	3	C	5	G	C	G	7	C	C	G	C	C	G	C	C	T	G	C	G	CG	G	C
Aegilops tauschii	Diploid	Wild species	TA10950	1	Azerbaijan	3	C	5	G	C	G	7	C	C	G	C	C	G	C	C	T	G	C	G	CG	G	C
Aegilops tauschii	Diploid	Wild species	TA1615	1	Turkmenistan	3	C	5	G	C	G	7	C	C	G	C	C	G	C	C	T	G	C	G	CG	G	C
Aegilops tauschii	Diploid	Wild species	TA1656	1	Azerbaijan, Goychay	3	C	5	G	C	G	7	C	C	G	C	C	G	C	C	T	G	C	G	CG	G	C
Aegilops tauschii	Diploid	Wild species	TA1658	1	Azerbaijan	3	C	5	G	C	G	7	C	C	G	C	C	G	C	C	T	G	C	G	CG	G	C
Aegilops tauschii	Diploid	Wild species	TA1659	1	Azerbaijan	3	C	5	G	C	G	7	C	C	G	C	C	G	C	C	T	G	C	G	CG	G	C
Aegilops tauschii	Diploid	Wild species	TA1665	1	Azerbaijan, Shamakhi	3	C	5	G	C	G	7	C	C	G	C	C	G	C	C	T	G	C	G	CG	G	C
Aegilops tauschii	Diploid	Wild species	TA1666	1	Azerbaijan, Shamakhi	3	C	5	G	C	G	7	C	C	G	C	C	G	C	C	T	G	C	G	CG	G	C
Aegilops tauschii	Diploid	Wild species	TA1668	1	Azerbaijan, Shamakhi	3	C	5	G	C	G	7	C	C	G	C	C	G	C	C	T	G	C	G	CG	G	C
Aegilops tauschii	Diploid	Wild species	TA1673	1	Azerbaijan	3	C	5	G	C	G	7	C	C	G	C	C	G	C	C	T	G	C	G	CG	G	C
Aegilops tauschii	Diploid	Wild species	TA1677	1	Azerbaijan	3	C	5	G	C	G	7	C	C	G	C	C	G	C	C	T	G	C	G	CG	G	C
Aegilops tauschii	Diploid	Wild species	TA1678	1	Azerbaijan	3	C	5	G	C	G	7	C	C	G	C	C	G	C	C	T	G	C	G	CG	G	C
Aegilops tauschii	Diploid	Wild species	TA1680	1	Azerbaijan	3	C	5	G	C	G	7	C	C	G	C	C	G	C	C	T	G	C	G	CG	G	C
Aegilops tauschii	Diploid	Wild species	TA1683	1	Azerbaijan	3	C	5	G	C	G	7	C	C	G	C	C	G	C	C	T	G	C	G	CG	G	C
Aegilops tauschii	Diploid	Wild species	TA1686	1	Azerbaijan, Shamakhi	3	C	5	G	C	G	7	C	C	G	C	C	G	C	C	T	G	C	G	CG	G	C
Aegilops tauschii	Diploid	Wild species	TA1690	1	NA	3	C	5	G	C	G	7	C	C	G	C	C	G	C	C	T	G	C	G	CG	G	C
Aegilops tauschii	Diploid	Wild species	TA1718	1	Iran, Markazi	3	C	5	G	C	G	7	C	C	G	C	C	G	C	C	T	G	C	G	CG	G	C
Aegilops tauschii	Diploid	Wild species	TA2369	1	Dagestan	3	C	5	G	C	G	7	C	C	G	C	C	G	C	C	T	G	C	G	CG	G	C
Aegilops tauschii	Diploid	Wild species	TA2446	1	Iran, Alborz	3	C	5	G	C	G	7	C	C	G	C	C	G	C	C	T	G	C	G	CG	G	C
Aegilops tauschii	Diploid	Wild species	TA2484	1	Iran	3	C	5	G	C	G	7	C	C	G	C	C	G	C	C	T	G	C	G	CG	G	C
Aegilops tauschii	Diploid	Wild species	TA2485	1	Iran	3	C	5	G	C	G	7	C	C	G	C	C	G	C	C	T	G	C	G	CG	G	C
Aegilops tauschii	Diploid	Wild species	TA2496	1	Iran, East Azerbaijan	3	C	5	G	C	G	7	C	C	G	C	C	G	C	C	T	G	C	G	CG	G	C
Aegilops tauschii	Diploid	Wild species	TA2497	1	Iran, Mazandaran	3	C	5	G	C	G	7	C	C	G	C	C	G	C	C	T	G	C	G	CG	G	C
Aegilops tauschii	Diploid	Wild species	TA2561	1	Azerbaijan	3	C	5	G	C	G	7	C	C	G	C	C	G	C	C	T	G	C	G	CG	G	C
Aegilops tauschii	Diploid	Wild species	TA2564	1	Azerbaijan	3	C	5	G	C	G	7	C	C	G	C	C	G	C	C	T	G	C	G	CG	G	C
Aegilops tauschii	Diploid	Wild species	TA2565	1	Azerbaijan	3	C	5	G	C	G	7	C	C	G	C	C	G	C	C	T	G	C	G	CG	G	C
Aegilops tauschii	Diploid	Wild species	TA2578	1	Georgia	3	C	5	G	C	G	7	C	C	G	C	C	G	C	C	T	G	C	G	CG	G	C
Aegilops tauschii	Diploid	Wild species	TA2530	1	Iran, Mazandaran	3	C	5	G	C	G	7/9	G	A	G	C	C	G	G	G	C	G	C	G	CG	G	C
Aegilops tauschii	Diploid	Wild species	TA2585	1	Georgia	3	C	5	G	C	G	7	G	A	G	C	C	G	G	G	C	G	T	A	CG	G	C
Aegilops tauschii	Diploid	Wild species	TA1642	1	Iran, Golestan	3	C	5	G	C	G	7	C	A	G	C	C	G	C/G	G	C	G	T	A	CG	G	C
Aegilops tauschii	Diploid	Wild species	TA1682	1	Azerbaijan	3	C	5	G	C	G	7	C	A	G	C	T	G	G	G	C	G	T	A	CG	G	C
Aegilops tauschii	Diploid	Wild species	ENT147	1	Azerbaijan	3	C	5	G	C	G	7	C	A	G	C	T	G	G	G	C	G	T	A	CG	G	C
Aegilops tauschii	Diploid	Wild species	ENT151	1	Azerbaijan	3	C	5	G	C	G	7	C	A	G	C	T	G	G	G	C	G	T	A	CG	G	C
Aegilops tauschii	Diploid	Wild species	ENT194	1	Azerbaijan	3	C	5	G	C	G	7	C	A	G	C	T	G	G	G	C	G	T	A	CG	G	C
Aegilops tauschii	Diploid	Wild species	TA10086	1	Azerbaijan	3	C	5	G	C	G	7	C	A	G	C	T	G	G	G	C	G	T	A	CG	G	C
Aegilops tauschii	Diploid	Wild species	TA10090	1	Azerbaijan	3	C	5	G	C	G	7	C	A	G	C	T	G	G	G	C	G	T	A	CG	G	C
Aegilops tauschii	Diploid	Wild species	TA10142	1	Syrian Arab Republic	3	C	5	G	C	G	7	C	A	G	C	T	G	G	G	C	G	T	A	CG	G	C
Aegilops tauschii	Diploid	Wild species	TA10945	1	Azerbaijan	3	C	5	G	C	G	7	C	A	G	C	T	G	G	G	C	G	T	A	CG	G	C
Aegilops tauschii	Diploid	Wild species	TA10951	1	Azerbaijan	3	C	5	G	C	G	7	C	A	G	C	T	G	G	G	C	G	T	A	CG	G	C
Aegilops tauschii	Diploid	Wild species	TA10952	1	Azerbaijan	3	C	5	G	C	G	7	C	A	G	C	T	G	G	G	C	G	T	A	CG	G	C
Aegilops tauschii	Diploid	Wild species	TA1622	1	Azerbaijan	3	C	5	G	C	G	7	C	A	G	C	T	G	G	G	C	G	T	A	CG	G	C
Aegilops tauschii	Diploid	Wild species	TA1661	1	Azerbaijan	3	C	5	G	C	G	7	C	A	G	C	T	G	G	G	C	G	T	A	CG	G	C
Aegilops tauschii	Diploid	Wild species	TA1691	1	NA	3	C	5	G	C	G	7	C	A	G	C	T	G	G	G	C	G	T	A	CG	G	C
Aegilops tauschii	Diploid	Wild species	TA1696	1	NA	3	C	5	G	C	G	7	C	A	G	C	T	G	G	G	C	G	T	A	CG	G	C
Aegilops tauschii	Diploid	Wild species	TA1715	1	Iran, Guilan	3	C	5	G	C	G	7	C	A	G	C	T	G	G	G	C	G	T	A	CG	G	C
Aegilops tauschii	Diploid	Wild species	TA2477	1	Iran, Guilan	3	C	5	G	C	G	7	C	A	G	C	T	G	G	G	C	G	T	A	CG	G	C
Aegilops tauschii	Diploid	Wild species	TA2478	1	Iran, Guilan	3	C	5	G	C	G	7	C	A	G	C	T	G	G	G	C	G	T	A	CG	G	C
Aegilops tauschii	Diploid	Wild species	TA2479	1	Iran, Guilan	3	C	5	G	C	G	7	C	A	G	C	T	G	G	G	C	G	T	A	CG	G	C
Aegilops tauschii	Diploid	Wild species	TA2480	1	Iran, Gilan	3	C	5	G	C	G	7	C	A	G	C	T	G	G	G	C	G	T	A	CG	G	C
Aegilops tauschii	Diploid	Wild species	TA2529	1	Iran, Mazandaran	3	C	5	G	C	G	7	C	A	G	C	T	G	G	G	C	G	T	A	CG	G	C
Aegilops tauschii	Diploid	Wild species	ENT197	1	Azerbaijan	3	C	5	G	C	G	7	C	A	G	C	C	G	G	G	C	G	T	A	CG	G	C
Aegilops tauschii	Diploid	Wild species	TA1600	1	Iran, Mazandaran	3	C	5	G	C	G	7	C	A	G	C	C	G	G	G	C	G	T	A	CG	G	C
Aegilops tauschii	Diploid	Wild species	TA1664	1	Azerbaijan	3	C	5	G	C	G	7	C	A	G	C	C	G	G	G	C	G	T	A	CG	G	C
Aegilops tauschii	Diploid	Wild species	TA1670	1	Azerbaijan	3	C	5	G	C	G	7	C	A	G	C	C	G	G	G	C	G	T	A	CG	G	C
Aegilops tauschii	Diploid	Wild species	TA1685	1	Azerbaijan	3	C	5	G	C	G	7	C	A	G	C	C	G	G	G	C	G	T	A	CG	G	C
Aegilops tauschii	Diploid	Wild species	TA2475	1	Iran, Mazandaran	3	C	5	G	C	G	7	C	A	G	C	C	G	G	G	C	G	T	A	CG	G	C
Aegilops tauschii	Diploid	Wild species	TA2481	1	Iran, Gilan	3	C	5	G	C	G	7	C	A	G	C	C	G	G	G	C	G	T	A	CG	G	C
Aegilops tauschii	Diploid	Wild species	TA2499	1	Iran, Mazandaran	3	C	5	G	C	G	7	C	A	G	C	C	G	G	G	C	G	T	A	CG	G	C
Aegilops tauschii	Diploid	Wild species	TA2470	1	Iran, Mazandaran	3	C	5	G	C	G	7	C	A	G	C	C	G	G	G	C	G	T	A	CG	G	C
Aegilops tauschii	Diploid	Wild species	TA2471	1	Iran, Mazandaran	3	C	5	G	C	G	7	C	A	G	C	C	G	G	G	C	G	T	A	CG	G	C
Aegilops tauschii	Diploid	Wild species	TA2474	1	Iran, Gilan	3	C	5	G	C	G	7	C	A	G	C	C	G	G	G	C	G	T	A	CG	G	C
Aegilops tauschii	Diploid	Wild species	TA1581	1	Iran	3	C	5	G	C	G	7	C	A	G	C	C	G	G	G	C	G	T	A	CG	G	C
Triticum aestivum ssp. aestivum	Hexaploid	Landrace	IWA8606038 (PI 628252)	2	Iran, Hamadān	NA	NA	NA	NA	NA	NA	NA	NA	NA	NA	NA	NA	NA	G	G	C	G	T	A	CG	NA	NA
Triticum aestivum ssp. aestivum	Hexaploid	Landrace	IWA8606024	2	Iran, Kermānshāh	NA	NA	NA	NA	NA	NA	NA	NA	NA	NA	NA	NA	NA	G	G	C	G	T	A	(CG, T-)	NA	NA
Triticum aestivum ssp. aestivum	Hexaploid	Landrace	IWA8606039	2	Iran, Hamadān	NA	NA	NA	NA	NA	NA	NA	NA	NA	NA	NA	NA	NA	G	G	C	G	T	A	(CG, T-)	NA	NA
Triticum aestivum ssp. aestivum	Hexaploid	Landrace	IWA8606075	2	Iran, Kermānshāh	NA	NA	NA	NA	NA	NA	NA	NA	NA	NA	NA	NA	NA	G	G	C	G	T	A	(CG, T-)	NA	NA
Triticum aestivum ssp. aestivum	Hexaploid	Landrace	IWA8606092	2	Iran, Kermānshāh	NA	NA	NA	NA	NA	NA	NA	NA	NA	NA	NA	NA	NA	G	G	C	G	T	A	(CG, T-)	NA	NA
Triticum aestivum ssp. aestivum	Hexaploid	Landrace	IWA8606143	2	Iran, Hamadān	NA	NA	NA	NA	NA	NA	NA	NA	NA	NA	NA	NA	NA	G	G	C	G	T	A	(CG, T-)	NA	NA
Triticum aestivum ssp. aestivum	Hexaploid	Landrace	IWA8606158	2	Iran, East Azerbaijan	NA	NA	NA	NA	NA	NA	NA	NA	NA	NA	NA	NA	NA	G	G	C	G	T	A	(CG, T-)	NA	NA
Triticum aestivum ssp. aestivum	Hexaploid	Landrace	IWA8606161	2	Iran, East Azerbaijan	NA	NA	NA	NA	NA	NA	NA	NA	NA	NA	NA	NA	NA	G	G	C	G	T	A	(CG, T-)	NA	NA
Triticum aestivum ssp. aestivum	Hexaploid	Landrace	IWA8606182	2	Iran, East Azerbaijan	NA	NA	NA	NA	NA	NA	NA	NA	NA	NA	NA	NA	NA	G	G	C	G	T	A	(CG, T-)	NA	NA
Triticum aestivum ssp. aestivum	Hexaploid	Landrace	IWA8606188	2	Iran, East Azerbaijan	NA	NA	NA	NA	NA	NA	NA	NA	NA	NA	NA	NA	NA	G	G	C	G	T	A	(CG, T-)	NA	NA
Triticum aestivum ssp. aestivum	Hexaploid	Landrace	IWA8606194	2	Iran, East Azerbaijan	NA	NA	NA	NA	NA	NA	NA	NA	NA	NA	NA	NA	NA	G	G	C	G	T	A	(CG, T-)	NA	NA
Triticum aestivum ssp. aestivum	Hexaploid	Landrace	IWA8606199	2	Iran, East Azerbaijan	NA	NA	NA	NA	NA	NA	NA	NA	NA	NA	NA	NA	NA	G	G	C	G	T	A	(CG, T-)	NA	NA
Triticum aestivum ssp. aestivum	Hexaploid	Landrace	IWA8606205	2	Iran, East Azerbaijan	NA	NA	NA	NA	NA	NA	NA	NA	NA	NA	NA	NA	NA	G	G	C	G	T	A	(CG, T-)	NA	NA
Triticum aestivum ssp. aestivum	Hexaploid	Landrace	IWA8608710	2	Iran, Kordestān	NA	NA	NA	NA	NA	NA	NA	NA	NA	NA	NA	NA	NA	G	G	C	G	T	A	(CG, T-)	NA	NA
Triticum aestivum ssp. aestivum	Hexaploid	Landrace	IWA8608754	2	Iran	NA	NA	NA	NA	NA	NA	NA	NA	NA	NA	NA	NA	NA	G	G	C	G	T	A	(CG, T-)	NA	NA
Triticum aestivum ssp. aestivum	Hexaploid	Landrace	IWA8608767	2	Iran, Kordestān	NA	NA	NA	NA	NA	NA	NA	NA	NA	NA	NA	NA	NA	G	G	C	G	T	A	(CG, T-)	NA	NA
Triticum aestivum ssp. aestivum	Hexaploid	Landrace	IWA8608769	2	Iran, Kordestān	NA	NA	NA	NA	NA	NA	NA	NA	NA	NA	NA	NA	NA	G	G	C	G	T	A	(CG, T-)	NA	NA
Triticum aestivum ssp. aestivum	Hexaploid	Landrace	IWA8608032	2	Iran, East Azerbaijan	NA	NA	NA	NA	NA	NA	NA	NA	NA	NA	NA	NA	NA	G	G	C	G	T	A	(CG, T-)	NA	NA
Triticum aestivum ssp. aestivum	Hexaploid	Landrace	IWA8608051	2	Iran, East Azerbaijan	NA	NA	NA	NA	NA	NA	NA	NA	NA	NA	NA	NA	NA	G	G	C	G	T	A	(CG, T-)	NA	NA
Triticum aestivum ssp. aestivum	Hexaploid	Landrace	IWA8608070	2	Iran, East Azerbaijan	NA	NA	NA	NA	NA	NA	NA	NA	NA	NA	NA	NA	NA	G	G	C	G	T	A	(CG, T-)	NA	NA
Triticum aestivum ssp. aestivum	Hexaploid	Landrace	IWA8611022	2	Iran, East Khorāsān	NA	NA	NA	NA	NA	NA	NA	NA	NA	NA	NA	NA	NA	G	G	C	G	T	A	(CG, T-)	NA	NA
Triticum aestivum ssp. aestivum	Hexaploid	Landrace	IWA8613514	2	Iran, Eşfahān	NA	NA	NA	NA	NA	NA	NA	NA	NA	NA	NA	NA	NA	G	G	C	G	T	A	(CG, T-)	NA	NA
Triticum aestivum ssp. aestivum	Hexaploid	Landrace	IWA8611032	2	Iran, East Khorāsān	NA	NA	NA	NA	NA	NA	NA	NA	NA	NA	NA	NA	NA	G	G	C	G	T	A	(CG, T-)	NA	NA
Triticum aestivum ssp. aestivum	Hexaploid	Landrace	PI 165162	2	Turkey, Yozgat	NA	NA	NA	NA	NA	NA	NA	NA	NA	NA	NA	NA	NA	G	G	C	G	T	A	(CG, T-)	NA	NA
Triticum aestivum ssp. aestivum	Hexaploid	Landrace	PI 166316	2	Turkey, Sivas	NA	NA	NA	NA	NA	NA	NA	NA	NA	NA	NA	NA	NA	G	G	C	G	T	A	(CG, T-)	NA	NA
Triticum aestivum ssp. aestivum	Hexaploid	Landrace	PI 166775	2	Turkey, Erzurum	NA	NA	NA	NA	NA	NA	NA	NA	NA	NA	NA	NA	NA	G	G	C	G	T	A	(CG, T-)	NA	NA
Triticum aestivum ssp. aestivum	Hexaploid	Landrace	PI 165143	2	Turkey, Ankara	NA	NA	NA	NA	NA	NA	NA	NA	NA	NA	NA	NA	NA	G	G	C	G	T	A	(CG, T-)	NA	NA
Triticum aestivum ssp. aestivum	Hexaploid	Landrace	PI 165208	2	Turkey, Konya	NA	NA	NA	NA	NA	NA	NA	NA	NA	NA	NA	NA	NA	G	G	C	G	T	A	(CG, T-)	NA	NA
Triticum aestivum ssp. aestivum	Hexaploid	Landrace	PI 166302	2	Turkey, Sivas	NA	NA	NA	NA	NA	NA	NA	NA	NA	NA	NA	NA	NA	G	G	C	G	T	A	(CG, T-)	NA	NA
Triticum aestivum ssp. aestivum	Hexaploid	Landrace	PI 166304	2	Turkey, Sivas	NA	NA	NA	NA	NA	NA	NA	NA	NA	NA	NA	NA	NA	G	G	C	G	T	A	(CG, T-)	NA	NA
Triticum aestivum ssp. aestivum	Hexaploid	Landrace	PI 109368	2	Turkey, Kastamonu	NA	NA	NA	NA	NA	NA	NA	NA	NA	NA	NA	NA	NA	G	G	C	G	T	A	(CG, T-)	NA	NA
Triticum aestivum ssp. aestivum	Hexaploid	Landrace	PI 111244	2	Turkey, Edirne	NA	NA	NA	NA	NA	NA	NA	NA	NA	NA	NA	NA	NA	G	G	C	G	T	A	(CG, T-)	NA	NA
Triticum aestivum ssp. aestivum	Hexaploid	Landrace	PI 117421	2	Turkey, Gaziantep	NA	NA	NA	NA	NA	NA	NA	NA	NA	NA	NA	NA	NA	G	G	C	G	T	A	(CG, T-)	NA	NA
Triticum aestivum ssp. aestivum	Hexaploid	Landrace	PI 119302	2	Turkey, Denizli	NA	NA	NA	NA	NA	NA	NA	NA	NA	NA	NA	NA	NA	G	G	C	G	T	A	(CG, T-)	NA	NA
Triticum aestivum ssp. aestivum	Hexaploid	Landrace	PI 119325	2	Turkey, Urfa	NA	NA	NA	NA	NA	NA	NA	NA	NA	NA	NA	NA	NA	G	G	C	G	T	A	(CG, T-)	NA	NA
Triticum aestivum ssp. aestivum	Hexaploid	Landrace	PI 119400	2	Turkey, Sakarya	NA	NA	NA	NA	NA	NA	NA	NA	NA	NA	NA	NA	NA	G	G	C	G	T	A	(CG, T-)	NA	NA
Triticum aestivum ssp. aestivum	Hexaploid	Landrace	PI 165113	2	Turkey, Diyarbakir	NA	NA	NA	NA	NA	NA	NA	NA	NA	NA	NA	NA	NA	G	G	C	G	T	A	(CG, T-)	NA	NA
Triticum aestivum ssp. aestivum	Hexaploid	Landrace	PI 166257	2	Turkey, Kayseri	NA	NA	NA	NA	NA	NA	NA	NA	NA	NA	NA	NA	NA	G	G	C	G	T	A	(CG, T-)	NA	NA
Triticum aestivum ssp. aestivum	Hexaploid	Landrace	PI 166553	2	Turkey, Bilecik	NA	NA	NA	NA	NA	NA	NA	NA	NA	NA	NA	NA	NA	G	G	C	G	T	A	(CG, T-)	NA	NA
Triticum aestivum ssp. aestivum	Hexaploid	Landrace	PI 166556	2	Turkey, Tekirdag	NA	NA	NA	NA	NA	NA	NA	NA	NA	NA	NA	NA	NA	G	G	C	G	T	A	(CG, T-)	NA	NA
Triticum aestivum ssp. aestivum	Hexaploid	Landrace	PI 166568	2	Turkey, Isparta	NA	NA	NA	NA	NA	NA	NA	NA	NA	NA	NA	NA	NA	G	G	C	G	T	A	(CG, T-)	NA	NA
Triticum aestivum ssp. aestivum	Hexaploid	Landrace	PI 166719	2	Turkey, Istanbul	NA	NA	NA	NA	NA	NA	NA	NA	NA	NA	NA	NA	NA	G	G	C	G	T	A	(CG, T-)	NA	NA
Triticum aestivum ssp. aestivum	Hexaploid	Landrace	PI 166746	2	Turkey, Erzurum	NA	NA	NA	NA	NA	NA	NA	NA	NA	NA	NA	NA	NA	G	G	C	G	T	A	(CG, T-)	NA	NA
Triticum aestivum ssp. aestivum	Hexaploid	Landrace	PI 166747	2	Turkey, Kars	NA	NA	NA	NA	NA	NA	NA	NA	NA	NA	NA	NA	NA	G	G	C	G	T	A	(CG, T-)	NA	NA
Triticum aestivum ssp. aestivum	Hexaploid	Landrace	PI 166792	2	Turkey, Bayburt	NA	NA	NA	NA	NA	NA	NA	NA	NA	NA	NA	NA	NA	G	G	C	G	T	A	(CG, T-)	NA	NA
Triticum aestivum ssp. aestivum	Hexaploid	Landrace	PI 166793	2	Turkey, Agri	NA	NA	NA	NA	NA	NA	NA	NA	NA	NA	NA	NA	NA	G	G	C	G	T	A	(CG, T-)	NA	NA
Triticum aestivum ssp. aestivum	Hexaploid	Landrace	PI 166807	2	Turkey, Bingol	NA	NA	NA	NA	NA	NA	NA	NA	NA	NA	NA	NA	NA	G	G	C	G	T	A	(CG, T-)	NA	NA
Triticum aestivum ssp. aestivum	Hexaploid	Landrace	PI 166947	2	Turkey, Cankiri	NA	NA	NA	NA	NA	NA	NA	NA	NA	NA	NA	NA	NA	G	G	C	G	T	A	(CG, T-)	NA	NA
Triticum aestivum ssp. aestivum	Hexaploid	Landrace	PI 125381	2	Afghanistan, Badakhshan	NA	NA	NA	NA	NA	NA	NA	NA	NA	NA	NA	NA	NA	G	G	C	G	T	A	(CG, T-)	NA	NA
Triticum aestivum ssp. aestivum	Hexaploid	Landrace	PI 135058	2	Afghanistan	NA	NA	NA	NA	NA	NA	NA	NA	NA	NA	NA	NA	NA	G	G	C	G	T	A	(CG, T-)	NA	NA
Triticum aestivum ssp. aestivum	Hexaploid	Cultivar	Cadenza	2	United Kingdom	NA	NA	NA	NA	NA	NA	NA	NA	NA	NA	NA	NA	NA	G	G	C	G	T	A	(CG, T-)	NA	NA
Triticum aestivum ssp. aestivum	Hexaploid	Cultivar	Paragon	2	United Kingdom	NA	NA	NA	NA	NA	NA	NA	NA	NA	NA	NA	NA	NA	G	G	C	G	T	A	(CG, T-)	NA	NA
Triticum aestivum ssp. aestivum	Hexaploid	Cultivar	Canthach	2	Canada	NA	NA	NA	NA	NA	NA	NA	NA	NA	NA	NA	NA	NA	G	G	C	G	T	A	(CG, T-)	NA	NA
Triticum aestivum ssp. aestivum	Hexaploid	Cultivar	Fielder (CItr 17268)	2	United States, Idaho	NA	NA	NA	NA	NA	NA	NA	NA	NA	NA	NA	NA	NA	G	G	C	G	T	A	(CG, T-)	NA	NA
Triticum aestivum ssp. aestivum	Hexaploid	Landrace	S0084	2	China	NA	NA	NA	NA	NA	NA	NA	NA	NA	NA	NA	NA	NA	G	G	C	G	T	A	(CG, T-)	NA	NA
Triticum aestivum ssp. aestivum	Hexaploid	Landrace	zm7827	2	China, Sichuan	NA	NA	NA	NA	NA	NA	NA	NA	NA	NA	NA	NA	NA	G	G	C	G	T	A	(CG, T-)	NA	NA
Triticum aestivum ssp. aestivum	Hexaploid	Landrace	zm8178	2	China, Sichuan	NA	NA	NA	NA	NA	NA	NA	NA	NA	NA	NA	NA	NA	G	G	C	G	T	A	(CG, T-)	NA	NA
Triticum aestivum ssp. aestivum	Hexaploid	Landrace	zm7915	2	China, Sichuan	NA	NA	NA	NA	NA	NA	NA	NA	NA	NA	NA	NA	NA	G	G	C	G	T	A	(CG, T-)	NA	NA
Triticum aestivum ssp. aestivum	Hexaploid	Landrace	zm7996	2	China, Sichuan	NA	NA	NA	NA	NA	NA	NA	NA	NA	NA	NA	NA	NA	G	G	C	G	T	A	(CG, T-)	NA	NA
Triticum aestivum ssp. aestivum	Hexaploid	Landrace	zm8004	2	China, Sichuan	NA	NA	NA	NA	NA	NA	NA	NA	NA	NA	NA	NA	NA	G	G	C	G	T	A	(CG, T-)	NA	NA
Triticum aestivum ssp. aestivum	Hexaploid	Landrace	zm8020	2	China, Sichuan	NA	NA	NA	NA	NA	NA	NA	NA	NA	NA	NA	NA	NA	G	G	C	G	T	A	(CG, T-)	NA	NA
Triticum aestivum ssp. aestivum	Hexaploid	Landrace	zm8027	2	China, Sichuan	NA	NA	NA	NA	NA	NA	NA	NA	NA	NA	NA	NA	NA	G	G	C	G	T	A	(CG, T-)	NA	NA
Triticum aestivum ssp. aestivum	Hexaploid	Landrace	zm8038	2	China, Sichuan	NA	NA	NA	NA	NA	NA	NA	NA	NA	NA	NA	NA	NA	G	G	C	G	T	A	(CG, T-)	NA	NA
Triticum aestivum ssp. aestivum	Hexaploid	Landrace	zm8066	2	China, Sichuan	NA	NA	NA	NA	NA	NA	NA	NA	NA	NA	NA	NA	NA	G	G	C	G	T	A	(CG, T-)	NA	NA
Triticum aestivum ssp. aestivum	Hexaploid	Landrace	zm8093	2	China, Sichuan	NA	NA	NA	NA	NA	NA	NA	NA	NA	NA	NA	NA	NA	G	G	C	G	T	A	(CG, T-)	NA	NA
Triticum aestivum ssp. aestivum	Hexaploid	Landrace	zm8101	2	China, Sichuan	NA	NA	NA	NA	NA	NA	NA	NA	NA	NA	NA	NA	NA	G	G	C	G	T	A	(CG, T-)	NA	NA
Triticum aestivum ssp. aestivum	Hexaploid	Landrace	zm8125	2	China, Sichuan	NA	NA	NA	NA	NA	NA	NA	NA	NA	NA	NA	NA	NA	G	G	C	G	T	A	(CG, T-)	NA	NA
Triticum aestivum ssp. aestivum	Hexaploid	Landrace	zm8165	2	China, Sichuan	NA	NA	NA	NA	NA	NA	NA	NA	NA	NA	NA	NA	NA	G	G	C	G	T	A	(CG, T-)	NA	NA
Triticum aestivum ssp. aestivum	Hexaploid	Landrace	zm8031	2	China, Sichuan	NA	NA	NA	NA	NA	NA	NA	NA	NA	NA	NA	NA	NA	G	G	C	G	T	A	(CG, T-)	NA	NA
Triticum aestivum ssp. aestivum	Hexaploid	Landrace	AS330	2	China, Tibet	NA	NA	NA	NA	NA	NA	NA	NA	NA	NA	NA	NA	NA	G	G	C	G	T	A	(CG, T-)	NA	NA
Triticum aestivum ssp. aestivum	Hexaploid	Landrace	AS908	2	China, Tibet	NA	NA	NA	NA	NA	NA	NA	NA	NA	NA	NA	NA	NA	G	G	C	G	T	A	(CG, T-)	NA	NA
Triticum aestivum ssp. aestivum	Hexaploid	Landrace	AS1027	2	China, Tibet	NA	NA	NA	NA	NA	NA	NA	NA	NA	NA	NA	NA	NA	G	G	C	G	T	A	(CG, T-)	NA	NA
Triticum aestivum ssp. aestivum	Hexaploid	Landrace	AS907	2	China, Tibet	NA	NA	NA	NA	NA	NA	NA	NA	NA	NA	NA	NA	NA	G	G	C	G	T	A	(CG, T-)	NA	NA
Triticum aestivum ssp. aestivum	Hexaploid	Landrace	AS1025	2	China, Tibet	NA	NA	NA	NA	NA	NA	NA	NA	NA	NA	NA	NA	NA	G	G	C	G	T	A	(CG, T-)	NA	NA
Triticum aestivum ssp. aestivum	Hexaploid	Landrace	AS334	2	China, Yunnan	NA	NA	NA	NA	NA	NA	NA	NA	NA	NA	NA	NA	NA	G	G	C	G	T	A	(CG, T-)	NA	NA
Triticum aestivum ssp. aestivum	Hexaploid	Landrace	AS340	2	China, Yunnan	NA	NA	NA	NA	NA	NA	NA	NA	NA	NA	NA	NA	NA	G	G	C	G	T	A	(CG, T-)	NA	NA
Triticum aestivum ssp. aestivum	Hexaploid	Landrace	AS335	2	China, Yunnan	NA	NA	NA	NA	NA	NA	NA	NA	NA	NA	NA	NA	NA	G	G	C	G	T	A	(CG, T-)	NA	NA
Triticum aestivum ssp. aestivum	Hexaploid	Landrace	AS336	2	China, Yunnan	NA	NA	NA	NA	NA	NA	NA	NA	NA	NA	NA	NA	NA	G	G	C	G	T	A	(CG, T-)	NA	NA
Triticum aestivum ssp. aestivum	Hexaploid	Landrace	AS337	2	China, Yunnan	NA	NA	NA	NA	NA	NA	NA	NA	NA	NA	NA	NA	NA	G	G	C	G	T	A	(CG, T-)	NA	NA
Triticum aestivum ssp. aestivum	Hexaploid	Landrace	zm8172	2	China, Sichuan	NA	NA	NA	NA	NA	NA	NA	NA	NA	NA	NA	NA	NA	G	G	C	G	T	A	T-	NA	NA
Triticum aestivum ssp. aestivum	Hexaploid	Landrace	IWA8606027	2	Iran	NA	NA	NA	NA	NA	NA	NA	NA	NA	NA	NA	NA	NA	G	G	C	G	T	A	T-	NA	NA
Triticum aestivum ssp. aestivum	Hexaploid	Landrace	Xianyangdasui	3	China, Shaanxi	NA	NA	NA	NA	NA	NA	NA	NA	NA	NA	NA	NA	NA	G	G	C	G	T	A	(CG, T-)	NA	NA
Triticum aestivum ssp. aestivum	Hexaploid	Cultivar	Xindong2	3	China, Xinjiang	NA	NA	NA	NA	NA	NA	NA	NA	NA	NA	NA	NA	NA	G	G	C	G	T	A	(CG, T-)	NA	NA
Triticum aestivum ssp. aestivum	Hexaploid	Landrace	Changmangshibiantou	3	China, Yunnan	NA	NA	NA	NA	NA	NA	NA	NA	NA	NA	NA	NA	NA	G	G	C	G	T	A	(CG, T-)	NA	NA
Triticum aestivum ssp. aestivum	Hexaploid	Landrace	Dahuangpi	3	China, Anhui	NA	NA	NA	NA	NA	NA	NA	NA	NA	NA	NA	NA	NA	G	G	C	G	T	A	(CG, T-)	NA	NA
Triticum aestivum ssp. aestivum	Hexaploid	Cultivar	Aimengniu	3	China, Shandong	NA	NA	NA	NA	NA	NA	NA	NA	NA	NA	NA	NA	NA	G	G	C	G	T	A	(CG, T-)	NA	NA
Triticum aestivum ssp. aestivum	Hexaploid	Landrace	Huomai	3	China, Henan	NA	NA	NA	NA	NA	NA	NA	NA	NA	NA	NA	NA	NA	G	G	C	G	T	A	(CG, T-)	NA	NA
Triticum aestivum ssp. aestivum	Hexaploid	Cultivar	Shijiazhuang407	3	China, Hebei	NA	NA	NA	NA	NA	NA	NA	NA	NA	NA	NA	NA	NA	G	G	C	G	T	A	(CG, T-)	NA	NA
Triticum aestivum ssp. aestivum	Hexaploid	Landrace	Sankecun	3	China, Hubei	NA	NA	NA	NA	NA	NA	NA	NA	NA	NA	NA	NA	NA	G	G	C	G	T	A	(CG, T-)	NA	NA
Triticum aestivum ssp. aestivum	Hexaploid	Landrace	Fumai	3	China, Henan	NA	NA	NA	NA	NA	NA	NA	NA	NA	NA	NA	NA	NA	G	G	C	G	T	A	(CG, T-)	NA	NA
Triticum aestivum ssp. aestivum	Hexaploid	Landrace	Jiangdongmen	3	China, Jiangsu	NA	NA	NA	NA	NA	NA	NA	NA	NA	NA	NA	NA	NA	G	G	C	G	T	A	(CG, T-)	NA	NA
Triticum aestivum ssp. aestivum	Hexaploid	Landrace	Suotiaohongmai	3	China, Shaanxi	NA	NA	NA	NA	NA	NA	NA	NA	NA	NA	NA	NA	NA	G	G	C	G	T	A	(CG, T-)	NA	NA
Triticum aestivum ssp. aestivum	Hexaploid	Landrace	Huangshuibai	3	China, Zhejiang	NA	NA	NA	NA	NA	NA	NA	NA	NA	NA	NA	NA	NA	G	G	C	G	T	A	(CG, T-)	NA	NA
Triticum aestivum ssp. aestivum	Hexaploid	Cultivar	Qianjiaomai	3	Unknown	NA	NA	NA	NA	NA	NA	NA	NA	NA	NA	NA	NA	NA	G	G	C	G	T	A	(CG, T-)	NA	NA
Triticum aestivum ssp. aestivum	Hexaploid	Landrace	Baituzitou	3	China, Shandong	NA	NA	NA	NA	NA	NA	NA	NA	NA	NA	NA	NA	NA	G	G	C	G	T	A	(CG, T-)	NA	NA
Triticum aestivum ssp. aestivum	Hexaploid	Landrace	Baimangmai	3	China, Guizhou	NA	NA	NA	NA	NA	NA	NA	NA	NA	NA	NA	NA	NA	G	G	C	G	T	A	(CG, T-)	NA	NA
Triticum aestivum ssp. aestivum	Hexaploid	Landrace	Hongjinmai	3	China, Gansu	NA	NA	NA	NA	NA	NA	NA	NA	NA	NA	NA	NA	NA	G	G	C	G	T	A	(CG, T-)	NA	NA
Triticum aestivum ssp. aestivum	Hexaploid	Landrace	Baiqimai	3	China, Gansu	NA	NA	NA	NA	NA	NA	NA	NA	NA	NA	NA	NA	NA	G	G	C	G	T	A	(CG, T-)	NA	NA
Triticum aestivum ssp. aestivum	Hexaploid	Landrace	Tongjiabaxiaomai	3	China, Sichuan	NA	NA	NA	NA	NA	NA	NA	NA	NA	NA	NA	NA	NA	G	G	C	G	T	A	(CG, T-)	NA	NA
Triticum aestivum ssp. aestivum	Hexaploid	Cultivar	Triumph	3	USA	NA	NA	NA	NA	NA	NA	NA	NA	NA	NA	NA	NA	NA	G	G	C	G	T	A	(CG, T-)	NA	NA
Triticum aestivum ssp. aestivum	Hexaploid	Cultivar	VillaGlori	3	Italy	NA	NA	NA	NA	NA	NA	NA	NA	NA	NA	NA	NA	NA	G	G	C	G	T	A	(CG, T-)	NA	NA
Triticum aestivum ssp. aestivum	Hexaploid	Landrace	Laoqimai	3	China, Shaanxi	NA	NA	NA	NA	NA	NA	NA	NA	NA	NA	NA	NA	NA	G	G	C	G	T	A	(CG, T-)	NA	NA
Triticum aestivum ssp. aestivum	Hexaploid	Landrace	Dayuhua	3	China, Jiangsu	NA	NA	NA	NA	NA	NA	NA	NA	NA	NA	NA	NA	NA	G	G	C	G	T	A	(CG, T-)	NA	NA
Triticum aestivum ssp. aestivum	Hexaploid	Landrace	Laomai	3	China, Shaanxi	NA	NA	NA	NA	NA	NA	NA	NA	NA	NA	NA	NA	NA	G	G	C	G	T	A	(CG, T-)	NA	NA
Triticum aestivum ssp. aestivum	Hexaploid	Landrace	Louguding	3	China, Shandong	NA	NA	NA	NA	NA	NA	NA	NA	NA	NA	NA	NA	NA	G	G	C	G	T	A	(CG, T-)	NA	NA
Triticum aestivum ssp. aestivum	Hexaploid	Landrace	Hongmai	3	China, Hebei	NA	NA	NA	NA	NA	NA	NA	NA	NA	NA	NA	NA	NA	G	G	C	G	T	A	(CG, T-)	NA	NA
Triticum aestivum ssp. aestivum	Hexaploid	Landrace	Dabaimai	3	China, Hebei	NA	NA	NA	NA	NA	NA	NA	NA	NA	NA	NA	NA	NA	G	G	C	G	T	A	(CG, T-)	NA	NA
Triticum aestivum ssp. aestivum	Hexaploid	Landrace	Jiangmai	3	China, Guizhou	NA	NA	NA	NA	NA	NA	NA	NA	NA	NA	NA	NA	NA	G	G	C	G	T	A	(CG, T-)	NA	NA
Triticum aestivum ssp. aestivum	Hexaploid	Landrace	Hanzhongbai	3	China, Shaanxi	NA	NA	NA	NA	NA	NA	NA	NA	NA	NA	NA	NA	NA	G	G	C	G	T	A	(CG, T-)	NA	NA
Triticum aestivum ssp. aestivum	Hexaploid	Landrace	Lanhuamai	3	China, Gansu	NA	NA	NA	NA	NA	NA	NA	NA	NA	NA	NA	NA	NA	G	G	C	G	T	A	(CG, T-)	NA	NA
Triticum aestivum ssp. aestivum	Hexaploid	Landrace	Sanyuehuang	3	China, Henan	NA	NA	NA	NA	NA	NA	NA	NA	NA	NA	NA	NA	NA	G	G	C	G	T	A	(CG, T-)	NA	NA
Triticum aestivum ssp. aestivum	Hexaploid	Cultivar	EarlyPremium	3	USA	NA	NA	NA	NA	NA	NA	NA	NA	NA	NA	NA	NA	NA	G	G	C	G	T	A	(CG, T-)	NA	NA
Triticum aestivum ssp. aestivum	Hexaploid	Landrace	Shanxibaimai	3	China, Gansu	NA	NA	NA	NA	NA	NA	NA	NA	NA	NA	NA	NA	NA	G	G	C	G	T	A	(CG, T-)	NA	NA
Triticum aestivum ssp. aestivum	Hexaploid	Landrace	Zhushimai	3	China, Yunnan	NA	NA	NA	NA	NA	NA	NA	NA	NA	NA	NA	NA	NA	G	G	C	G	T	A	(CG, T-)	NA	NA
Triticum aestivum ssp. aestivum	Hexaploid	Landrace	Bendihuanghuamai	3	China, Sichuan	NA	NA	NA	NA	NA	NA	NA	NA	NA	NA	NA	NA	NA	G	G	C	G	T	A	(CG, T-)	NA	NA
Triticum aestivum ssp. aestivum	Hexaploid	Cultivar	Jinan17	3	China, Shandong	NA	NA	NA	NA	NA	NA	NA	NA	NA	NA	NA	NA	NA	G	G	C	G	T	A	(CG, T-)	NA	NA
Triticum aestivum ssp. aestivum	Hexaploid	Landrace	Dachunbaisilengmai	3	China, Sichuan	NA	NA	NA	NA	NA	NA	NA	NA	NA	NA	NA	NA	NA	G	G	C	G	T	A	(CG, T-)	NA	NA
Triticum aestivum ssp. aestivum	Hexaploid	Landrace	Daimanghongmai	3	China, Tianjin	NA	NA	NA	NA	NA	NA	NA	NA	NA	NA	NA	NA	NA	G	G	C	G	T	A	(CG, T-)	NA	NA
Triticum aestivum ssp. aestivum	Hexaploid	Landrace	Laolaixia	3	China, Shandong	NA	NA	NA	NA	NA	NA	NA	NA	NA	NA	NA	NA	NA	G	G	C	G	T	A	(CG, T-)	NA	NA
Triticum aestivum ssp. aestivum	Hexaploid	Landrace	Youmangbaifu	3	China, Jilin	NA	NA	NA	NA	NA	NA	NA	NA	NA	NA	NA	NA	NA	G	G	C	G	T	A	(CG, T-)	NA	NA
Triticum aestivum ssp. aestivum	Hexaploid	Landrace	Fuyanghong	3	China, Anhui	NA	NA	NA	NA	NA	NA	NA	NA	NA	NA	NA	NA	NA	G	G	C	G	T	A	(CG, T-)	NA	NA
Triticum aestivum ssp. aestivum	Hexaploid	Landrace	Motuoxiaomai	3	China, Xizang	NA	NA	NA	NA	NA	NA	NA	NA	NA	NA	NA	NA	NA	G	G	C	G	T	A	(CG, T-)	NA	NA
Triticum aestivum ssp. aestivum	Hexaploid	Landrace	Hongheshangtou	3	China, Henan	NA	NA	NA	NA	NA	NA	NA	NA	NA	NA	NA	NA	NA	G	G	C	G	T	A	(CG, T-)	NA	NA
Triticum aestivum ssp. aestivum	Hexaploid	Landrace	Huangguaxian	3	China, Shandong	NA	NA	NA	NA	NA	NA	NA	NA	NA	NA	NA	NA	NA	G	G	C	G	T	A	(CG, T-)	NA	NA
Triticum aestivum ssp. aestivum	Hexaploid	Landrace	Zipi	3	China, Sichuan	NA	NA	NA	NA	NA	NA	NA	NA	NA	NA	NA	NA	NA	G	G	C	G	T	A	(CG, T-)	NA	NA
Triticum aestivum ssp. aestivum	Hexaploid	Cultivar	Youbaomai	3	China, Shandong	NA	NA	NA	NA	NA	NA	NA	NA	NA	NA	NA	NA	NA	G	G	C	G	T	A	(CG, T-)	NA	NA
Triticum aestivum ssp. aestivum	Hexaploid	Landrace	Zhuoludongmai	3	China, Hebei	NA	NA	NA	NA	NA	NA	NA	NA	NA	NA	NA	NA	NA	G	G	C	G	T	A	(CG, T-)	NA	NA
Triticum aestivum ssp. aestivum	Hexaploid	Landrace	Xiaokouhong	3	China, Liaoning	NA	NA	NA	NA	NA	NA	NA	NA	NA	NA	NA	NA	NA	G	G	C	G	T	A	(CG, T-)	NA	NA
Triticum aestivum ssp. aestivum	Hexaploid	Landrace	Youmangsaogudan	3	China, Henan	NA	NA	NA	NA	NA	NA	NA	NA	NA	NA	NA	NA	NA	G	G	C	G	T	A	(CG, T-)	NA	NA
Triticum aestivum ssp. aestivum	Hexaploid	Cultivar	Nonglin10	3	Japan	NA	NA	NA	NA	NA	NA	NA	NA	NA	NA	NA	NA	NA	G	G	C	G	T	A	(CG, T-)	NA	NA
Triticum aestivum ssp. aestivum	Hexaploid	Landrace	Zhugoumai	3	China, Yunnan	NA	NA	NA	NA	NA	NA	NA	NA	NA	NA	NA	NA	NA	G	G	C	G	T	A	(CG, T-)	NA	NA
Triticum aestivum ssp. aestivum	Hexaploid	Landrace	Baidatou	3	China, Gansu	NA	NA	NA	NA	NA	NA	NA	NA	NA	NA	NA	NA	NA	G	G	C	G	T	A	(CG, T-)	NA	NA
Triticum aestivum ssp. aestivum	Hexaploid	Landrace	Xishanbiansui	3	China, Shandong	NA	NA	NA	NA	NA	NA	NA	NA	NA	NA	NA	NA	NA	G	G	C	G	T	A	(CG, T-)	NA	NA
Triticum aestivum ssp. aestivum	Hexaploid	Landrace	Baimaizi	3	China, Sichuan	NA	NA	NA	NA	NA	NA	NA	NA	NA	NA	NA	NA	NA	G	G	C	G	T	A	(CG, T-)	NA	NA
Triticum aestivum ssp. aestivum	Hexaploid	Landrace	Baiqiumai	3	China, Hebei	NA	NA	NA	NA	NA	NA	NA	NA	NA	NA	NA	NA	NA	G	G	C	G	T	A	(CG, T-)	NA	NA
Triticum aestivum ssp. aestivum	Hexaploid	Landrace	Hongpidongmai	3	China, Shanxi	NA	NA	NA	NA	NA	NA	NA	NA	NA	NA	NA	NA	NA	G	G	C	G	T	A	(CG, T-)	NA	NA
Triticum aestivum ssp. aestivum	Hexaploid	Landrace	Mazhamai	3	China, Shaanxi	NA	NA	NA	NA	NA	NA	NA	NA	NA	NA	NA	NA	NA	G	G	C	G	T	A	(CG, T-)	NA	NA
Triticum aestivum ssp. aestivum	Hexaploid	Landrace	Xiaobaimang	3	China, Hebei	NA	NA	NA	NA	NA	NA	NA	NA	NA	NA	NA	NA	NA	G	G	C	G	T	A	(CG, T-)	NA	NA
Triticum aestivum ssp. aestivum	Hexaploid	Landrace	Niuzhijia	3	China, Shanxi	NA	NA	NA	NA	NA	NA	NA	NA	NA	NA	NA	NA	NA	G	G	C	G	T	A	(CG, T-)	NA	NA
Triticum aestivum ssp. aestivum	Hexaploid	Landrace	Panshiwumang	3	China, Jilin	NA	NA	NA	NA	NA	NA	NA	NA	NA	NA	NA	NA	NA	G	G	C	G	T	A	(CG, T-)	NA	NA
Triticum aestivum ssp. aestivum	Hexaploid	Landrace	Jiahongmai	3	China, Shanxi	NA	NA	NA	NA	NA	NA	NA	NA	NA	NA	NA	NA	NA	G	G	C	G	T	A	(CG, T-)	NA	NA
Triticum aestivum ssp. aestivum	Hexaploid	Landrace	Laotutou	3	China, Ningxia	NA	NA	NA	NA	NA	NA	NA	NA	NA	NA	NA	NA	NA	G	G	C	G	T	A	(CG, T-)	NA	NA
Triticum aestivum ssp. aestivum	Hexaploid	Landrace	Honghuamai	3	China, Sichuan	NA	NA	NA	NA	NA	NA	NA	NA	NA	NA	NA	NA	NA	G	G	C	G	T	A	(CG, T-)	NA	NA
Triticum aestivum ssp. aestivum	Hexaploid	Landrace	Honglaomai	3	China, Shaanxi	NA	NA	NA	NA	NA	NA	NA	NA	NA	NA	NA	NA	NA	G	G	C	G	T	A	(CG, T-)	NA	NA
Triticum aestivum ssp. aestivum	Hexaploid	Landrace	Xiaofoshou	3	China, Henan	NA	NA	NA	NA	NA	NA	NA	NA	NA	NA	NA	NA	NA	G	G	C	G	T	A	(CG, T-)	NA	NA
Triticum aestivum ssp. aestivum	Hexaploid	Landrace	Zijiehong	3	China, Shandong	NA	NA	NA	NA	NA	NA	NA	NA	NA	NA	NA	NA	NA	G	G	C	G	T	A	(CG, T-)	NA	NA
Triticum aestivum ssp. aestivum	Hexaploid	Landrace	Yuqiumai	3	China, Guizhou	NA	NA	NA	NA	NA	NA	NA	NA	NA	NA	NA	NA	NA	G	G	C	G	T	A	(CG, T-)	NA	NA
Triticum aestivum ssp. aestivum	Hexaploid	Cultivar	Laizhou953	3	China, Shandong	NA	NA	NA	NA	NA	NA	NA	NA	NA	NA	NA	NA	NA	G	G	C	G	T	A	(CG, T-)	NA	NA
Triticum aestivum ssp. aestivum	Hexaploid	Landrace	Baibiansui	3	China, Shandong	NA	NA	NA	NA	NA	NA	NA	NA	NA	NA	NA	NA	NA	G	G	C	G	T	A	(CG, T-)	NA	NA
Triticum aestivum ssp. aestivum	Hexaploid	Landrace	Hongmangmai	3	China, Hebei	NA	NA	NA	NA	NA	NA	NA	NA	NA	NA	NA	NA	NA	G	G	C	NA	T	A	(CG, T-)	NA	NA
Triticum aestivum ssp. aestivum	Hexaploid	Landrace	Baihuamai	3	China, Guizhou	NA	NA	NA	NA	NA	NA	NA	NA	NA	NA	NA	NA	NA	G	G	C	G/A	T	A	(CG, T-)	NA	NA
Triticum aestivum ssp. aestivum	Hexaploid	Landrace	Paozimai	3	China, Jiangxi	NA	NA	NA	NA	NA	NA	NA	NA	NA	NA	NA	NA	NA	G	G	C	G/A	T	A	(CG, T-)	NA	NA
Triticum aestivum ssp. aestivum	Hexaploid	Cultivar	Aodesa3	3	Russia	NA	NA	NA	NA	NA	NA	NA	NA	NA	NA	NA	NA	NA	G	G	C	G/A	T	A	(CG, T-)	NA	NA
Triticum aestivum ssp. aestivum	Hexaploid	Landrace	Honggoudou	3	China, Henan	NA	NA	NA	NA	NA	NA	NA	NA	NA	NA	NA	NA	NA	G	G	C	G/A	T	A	(CG, T-)	NA	NA
Triticum aestivum ssp. aestivum	Hexaploid	Landrace	Hongxumai	3	China, Shaanxi	NA	NA	NA	NA	NA	NA	NA	NA	NA	NA	NA	NA	NA	G	G	C	G/A	T	A	(CG, T-)	NA	NA
Triticum aestivum ssp. aestivum	Hexaploid	Landrace	Dakoumai	3	China, Henan	NA	NA	NA	NA	NA	NA	NA	NA	NA	NA	NA	NA	NA	G	G	C	G	T	A	NA	NA	NA
Triticum aestivum ssp. aestivum	Hexaploid	Landrace	Zaowutian	3	China, Jiangsu	NA	NA	NA	NA	NA	NA	NA	NA	NA	NA	NA	NA	NA	G	G	C	G	T	A	NA	NA	NA
Triticum aestivum ssp. aestivum	Hexaploid	Landrace	Dalibanmang	3	China, Shandong	NA	NA	NA	NA	NA	NA	NA	NA	NA	NA	NA	NA	NA	G	G	C	G	T	A	NA	NA	NA
Triticum aestivum ssp. aestivum	Hexaploid	Landrace	Chanbuzhi	3	China, Anhui	NA	NA	NA	NA	NA	NA	NA	NA	NA	NA	NA	NA	NA	G	G	C	G	T	A	NA	NA	NA
Triticum aestivum ssp. aestivum	Hexaploid	Landrace	BaipuLuoqing	3	China, Zhejiang	NA	NA	NA	NA	NA	NA	NA	NA	NA	NA	NA	NA	NA	G	G	C	G	T	A	NA	NA	NA
Triticum aestivum ssp. aestivum	Hexaploid	Landrace	Hongmangzi	3	China, Hubei	NA	NA	NA	NA	NA	NA	NA	NA	NA	NA	NA	NA	NA	G	G	C	G	T	A	NA	NA	NA
Triticum aestivum ssp. aestivum	Hexaploid	Landrace	Liuzhutou	3	China, Jiangsu	NA	NA	NA	NA	NA	NA	NA	NA	NA	NA	NA	NA	NA	G	G	C	G	T	A	NA	NA	NA
Triticum aestivum ssp. aestivum	Hexaploid	Landrace	Shuilizhan	3	China, Jiangxi	NA	NA	NA	NA	NA	NA	NA	NA	NA	NA	NA	NA	NA	G	G	C	G	T	A	NA	NA	NA
Triticum aestivum ssp. aestivum	Hexaploid	Cultivar	Funo	3	Italy	NA	NA	NA	NA	NA	NA	NA	NA	NA	NA	NA	NA	NA	G	G	C	G	T	A	NA	NA	NA
Triticum aestivum ssp. aestivum	Hexaploid	Landrace	Huanxiangguo	3	China, Sichuan	NA	NA	NA	NA	NA	NA	NA	NA	NA	NA	NA	NA	NA	G	G	C	G	T	A	NA	NA	NA
Triticum aestivum ssp. aestivum	Hexaploid	Landrace	Youzimai	3	China, Henan	NA	NA	NA	NA	NA	NA	NA	NA	NA	NA	NA	NA	NA	G	G	C	G	T	A	NA	NA	NA
Triticum aestivum ssp. aestivum	Hexaploid	Cultivar	Zhengyin4	3	Italy	NA	NA	NA	NA	NA	NA	NA	NA	NA	NA	NA	NA	NA	G	G	C	G	T	A	NA	NA	NA
Triticum aestivum ssp. aestivum	Hexaploid	Cultivar	Lovrin10	3	Romania	NA	NA	NA	NA	NA	NA	NA	NA	NA	NA	NA	NA	NA	G	G	C	G	T	A	NA	NA	NA
Triticum aestivum ssp. aestivum	Hexaploid	Landrace	Zaoxiaomai	3	China, Zhejiang	NA	NA	NA	NA	NA	NA	NA	NA	NA	NA	NA	NA	NA	G	G	C	G	T	A	NA	NA	NA
Triticum aestivum ssp. aestivum	Hexaploid	Cultivar	Xiaoyan6	3	China, Shaanxi	NA	NA	NA	NA	NA	NA	NA	NA	NA	NA	NA	NA	NA	G	G	C	G	T	A	NA	NA	NA
Triticum aestivum ssp. aestivum	Hexaploid	Landrace	Banjiemang	3	China, Jiangsu	NA	NA	NA	NA	NA	NA	NA	NA	NA	NA	NA	NA	NA	G	G	C	G	T	A	NA	NA	NA
Triticum aestivum ssp. aestivum	Hexaploid	Landraces and cultivars	777 accessions (see He et al., 2019)	4	See He et al., 2019	NA	NA	NA	NA	NA	NA	NA	C	A	G	C	C	G	G	G	C	G	T	A	NA	G	C
Triticum aestivum ssp. compactum	Hexaploid	Club wheat	PI 372151	4	Armenia	NA	NA	NA	NA	NA	NA	NA	C	A	G	C	C	G	G	G	C	G	T	A	NA	G	C
Triticum aestivum ssp. compactum	Hexaploid	Club wheat	132253	4	Georgia	NA	NA	NA	NA	NA	NA	NA	C	A	G	C	C	G	G	G	C	G	T	A	NA	G	C
Triticum aestivum ssp. compactum	Hexaploid	Club wheat	132255	4	Cyprus	NA	NA	NA	NA	NA	NA	NA	C	A	G	C	C	G	G	G	C	G	T	A	NA	G	C
Triticum aestivum ssp. compactum	Hexaploid	Club wheat	132256	4	Former Soviet Union	NA	NA	NA	NA	NA	NA	NA	C	A	G	C	C	G	G	G	C	G	T	A	NA	G	C
Triticum aestivum ssp. sphaerococcum	Hexaploid	Indian dwarf wheat	101198	4	India	NA	NA	NA	NA	NA	NA	NA	C	A	G	C	C	G	G	G	C	G	T	A	NA	G	C
Triticum aestivum ssp. sphaerococcum	Hexaploid	Indian dwarf wheat	PI 190982	4	Belgium	NA	NA	NA	NA	NA	NA	NA	C	A	G	C	C	G	G	G	C	G	T	A	NA	G	C
Triticum aestivum ssp. sphaerococcum	Hexaploid	Indian dwarf wheat	PI 330556	4	United Kingdom, England	NA	NA	NA	NA	NA	NA	NA	C	A	G	C	C	G	G	G	C	G	T	A	NA	G	C
Triticum aestivum ssp. aestivum	Hexaploid	Cultivar	PI 473550	4	United States, Washington	NA	NA	NA	NA	NA	NA	NA	C	A	G	C	C	G/A	G	G	C	G	T	A	NA	G	C
Triticum aestivum ssp. aestivum	Hexaploid	Cultivar	PI 191304	4	Belgium, Région wallonne	NA	NA	NA	NA	NA	NA	NA	C	A	G	C	C	G/A	G	G	C	G	T	A	NA	G	C
Triticum aestivum ssp. aestivum	Hexaploid	Landrace	132082	4	Spain	NA	NA	NA	NA	NA	NA	NA	C	A	G	C	C	G/A	G	G	C	G	T	A	NA	G	C
Triticum aestivum ssp. aestivum	Hexaploid	Landrace	Chinese Spring (Reference)	5	China, Sichuan	3	C	5	G	C	G	7	C	A	G	C	C	G	G	G	C	G	T	A	(CG, T-)	G	C
