# Supplementary material
Source: Research Square preprint supplement (doi:10.21203/rs.3.rs-9315249/v1)
Supplement: Supplementary file 9 [file af637293720f9d19070b3ac9.xlsx]

## Sheet: For paper publication
Supplementary Data 4. Polymerase chain reaction (PCR) primers and gRNAs.
Marker	Forward (5' - 3')	Reverse (5' - 3')	Chromosome/Transgene
XBF201235	GGAGTTTGAGAACGCCAGAG	CCGCATCTGCTATGAGGGTA	2D
AET2Gv20087700	GCCTCTCCCCAGAAGTTAATGA	CGTCCTCCCCTCTTCATCAATA	2D
AET2Gv20102000	CCAGGAGCCAGTTCTCTTTG	CTCCAGTTCTCCCCACTAGCA	2D
Xwmc112	TGAGTTGTGGGGTCTTGTTTGG	TGAAGGAGGGCACATATCGTTG	2D
AET2Gv20108000	AATGTCTTGGCAGGAACCAG	CCGCGTCTGGAAAATAAGAA	2D
AET2Gv20108800	CGACAACCCCTACCTCCAG	GCTCAACAGGATCTCCCAAG	2D
AET2Gv20108700	GCTATTGGAGCCCAATTTCA	CAGGATGAGGACGAAGAGGA	2D
AET2Gv20109100	CTTGACGTACGGCATCTTCAG	CCCCTAAAGCTGCTCCTTG	2D
AET2Gv20109300	GCCTTTGCATCCTCAGCATAC	CCTTTCTCTCATCGGTGCATTG	2D
SSR 946	CGCGCTATGGTCTAGTGTGA	GAAACGCCTAGGTTGTGAGC	2D
AET2Gv20109500 used for mapping. Only distal part of CDS is amplified.The amplicon does not involve the 1649-1650 bp site.	TGTAGTATAAATGGCACTCCACTAGG	CGACATGCTAACCGAGACTG	2D
Aet_25293813	TACAAACAATGGCAAATCCCTG	GGTGCAACTTTTCTCCATCC	2D
AET2Gv20110400	CTCTTAAGTTTGCTGTCTGTGGTGAC	CAAAACTCTTGATTTGGCTCATACTCCT	2D
AET2Gv20110900	GCAATGCTTTGGCTGGTATT	CATCAATCAGTTGCACAGCA	2D
AET2Gv20111700	CTCACATGCTGGTCATTTGG	ATTCCCTTAGGCTTGCCAAT	2D
AET2Gv20111900	TGGATTGGAGAGGATTCTGG	GGAAACAACAGGTGCCAAAC	2D
AET2Gv20112100	TGCAAGGTTCAGTGTGCTTC	TTGGCAGATGCTTTGAATTG	2D
AET2Gv20112900	CCGATGGCTGCATCTATTTC	GCATGTGCATTTTACCTTCG	2D
XCA658378	CCTTCGCTTCTCGAATCTTG	AAGTAACCATCATATTGACAATGGGA	2D
XBE488719	GAGTAATGCTGGATGTAATTCCA	AAAATCCAACCTTTTCAGCAA	2D
TraesCS2A02G059900	CTCGAGACCAAGCACCAT	GGGGGCACAATCAAAAAAAGACTA	2A
TraesCS2B02G073600	CTTCGGCTCCAAGACTCTT	GCTAACATCAAATGCACAACGG	2B
AET2Gv20109500 used to sequence the CDS 1649-1650 bp mutant site	CCAAGATCGCCAGCTACTTC	TGGAAGGTACCTCCTGTCA	2D
AET2Gv20109500 used for validation of transgenic plants (first half of CDS)	CAGAGATGCTTTTTGTTCGC	GCCATGGACTTGGCAGGTAAGGTT	Transgene
AET2Gv20109500 used for validation of transgenic plants (second half of CDS)	CTCGAGACCAAGCACCAT	GAAGCAAGCCTTGAATCGTC	Transgene
AET2Gv20109500 for qPCR	TGGTGAAGGAGATGGAGACC	TGGAAGGTACCTCCTGTCA	2D
Actin gene for cDNA qPCR	ACCTTCAGTTGCCCAGCAAT	CAGAGTCGAGCACAATACCAGTTG	1A, 1B and 1D
Primer for the detection of of JD633 vector-F	TTGTAAAACGACGGCCAGTG
Primers for the detection of of JD633 vector-R	tccagcagagttctgaccg
Primer for the detection of Cas9: ZCZp166_zCas9-F	AGACCGTGAAGGTTGTGGACGAGCT
Primer for the detection of Cas9: ZCZp201_TaCAS9-R	CTTAACCTCCCTGATCAGCTTGTCGT
		pam site
CRISPR primer 52 at 510 to 525 bp on - strand	GACGTGGTGCTGGTGCGAGG	CGG	unique to 2D
CRISPR primer 58 at 820 to 832 bp on + strand	TGGGCTGCCGGAGATATCGC	GGG	unique to 2D
CRISPR primer 90 at 203 to 222 bp on - strand	GTTGGAGGCGGAGAACGTCG	CGG	unique to 2D
CRISPR primer 94 at 912 to 925 bp on - strand	GCTGGAAGAACCGCGCCTCA	CGG	unique to 2D
