# Supplementary material
Source: Research Square preprint supplement (doi:10.21203/rs.3.rs-9315249/v1)
Supplement: Supplementary file 10 [file cb7806eb11dd12a9a96523b0.xlsx]

## Sheet: Sheet1
Supplementary Data 8. Tg-D1 haplotypes detected in accessions of spelt, macha and Vavilov wheat The type of mutation (synonymous, missence, or frameshift) is indicated for each polymorphic position in row 2. Cells with bases identical to those in the CS reference sequence are green, those containing polymorphic bases are of some other color, and those containing unknown bases are colorless. SSRs …
						synonymous	missense	synonymous	synonymous	synonymous	missense	synonymous	synonymous	synonymous	synonymous	missense	synonymous	synonymous	synonymous	synonymous	synonymous	missense	synonymous	synonymous	frameshift	synonymous	synonymous
Species	Ploidy	Common name	Accession	Data source	Source	60-77 bp	125 bp	376-390 bp	402 bp	480 bp	532 bp	522-542 bp	846 bp	1086 bp	1152 bp	1247 bp	1320 bp	1397 bp	1449 bp	1467 bp	1491 bp	1570 bp	1602 bp	1617 bp	1649-1650 bp	2076 bp	2418 bp
Triticum aestivum ssp. spelta	Hexaploid	Spelt	PI 221420	2	Serbia	NA	NA	NA	NA	NA	NA	NA	NA	NA	NA	NA	NA	NA	G	G	C	G	T	A	T-	NA	NA
Triticum aestivum ssp. spelta	Hexaploid	Spelt	PI 272574	2	Hungary	NA	NA	NA	NA	NA	NA	NA	NA	NA	NA	NA	NA	NA	G	G	C	G	T	A	T-	NA	NA
Triticum aestivum ssp. spelta	Hexaploid	Spelt	PI 272577	2	Hungary	NA	NA	NA	NA	NA	NA	NA	NA	NA	NA	NA	NA	NA	G	G	C	G	T	A	T-	NA	NA
Triticum aestivum ssp. spelta	Hexaploid	Spelt	PI 272578	2	Hungary	NA	NA	NA	NA	NA	NA	NA	NA	NA	NA	NA	NA	NA	G	G	C	G	T	A	T-	NA	NA
Triticum aestivum ssp. spelta	Hexaploid	Spelt	PI 286060	2	Poland	NA	NA	NA	NA	NA	NA	NA	NA	NA	NA	NA	NA	NA	G	G	C	G	T	A	T-	NA	NA
Triticum aestivum ssp. spelta	Hexaploid	Spelt	PI 289607	2	England	NA	NA	NA	NA	NA	NA	NA	NA	NA	NA	NA	NA	NA	G	G	C	G	T	A	T-	NA	NA
Triticum aestivum ssp. spelta	Hexaploid	Spelt	PI 295061	2	Bulgaria	NA	NA	NA	NA	NA	NA	NA	NA	NA	NA	NA	NA	NA	G	G	C	G	T	A	T-	NA	NA
Triticum aestivum ssp. spelta	Hexaploid	Spelt	PI 295063	2	Bulgaria	NA	NA	NA	NA	NA	NA	NA	NA	NA	NA	NA	NA	NA	NA	G	C	G	T	A	T-	NA	NA
Triticum aestivum ssp. spelta	Hexaploid	Spelt	PI 306550	2	Romania	NA	NA	NA	NA	NA	NA	NA	NA	NA	NA	NA	NA	NA	G	G	C	G	T	A	T-	NA	NA
Triticum aestivum ssp. spelta	Hexaploid	Spelt	PI 362062	2	Romania	NA	NA	NA	NA	NA	NA	NA	NA	NA	NA	NA	NA	NA	G	G	C	G	T	A	T-	NA	NA
Triticum aestivum ssp. spelta	Hexaploid	Spelt	PI 367199	2	Afghanistan, Herāt	NA	NA	NA	NA	NA	NA	NA	NA	NA	NA	NA	NA	NA	G	G	C	G	T	A	(CG, T-)	NA	NA
Triticum aestivum ssp. spelta	Hexaploid	Spelt	DV1129 (=417a)	2	Iran, Bakhtiari province	NA	NA	NA	NA	NA	NA	NA	NA	NA	NA	NA	NA	NA	G	G	C	G	T	A	(CG, T-)	NA	NA
Triticum aestivum ssp. spelta	Hexaploid	Spelt	DV1132 (=405a)	2	Iran, Bakhtiari province	NA	NA	NA	NA	NA	NA	NA	NA	NA	NA	NA	NA	NA	G	G	C	G	T	A	(CG, T-)	NA	NA
Triticum aestivum ssp. spelta	Hexaploid	Spelt	DV 1217	2	Azerbaijan	NA	NA	NA	NA	NA	NA	NA	NA	NA	NA	NA	NA	NA	G	G	C	G	T	A	(CG, T-)	NA	NA
Triticum aestivum ssp. spelta	Hexaploid	Spelt	DV 1218	2	Tajikistan	NA	NA	NA	NA	NA	NA	NA	NA	NA	NA	NA	NA	NA	G	G	C	G	T	A	(CG, T-)	NA	NA
Triticum aestivum ssp. spelta	Hexaploid	Spelt	PI 367202	2	Afghanistan, Ghōr	NA	NA	NA	NA	NA	NA	NA	NA	NA	NA	NA	NA	NA	G	G	C	G	T	A	CG	NA	NA
Triticum aestivum ssp. spelta	Hexaploid	Spelt	DV1130 (=407a)	2	Iran, Bakhtiari province	NA	NA	NA	NA	NA	NA	NA	NA	NA	NA	NA	NA	NA	G	G	C	G	T	A	CG	NA	NA
Triticum aestivum ssp. spelta	Hexaploid	Spelt	DV1133 (=77d)	2	Iran, Isfahan	NA	NA	NA	NA	NA	NA	NA	NA	NA	NA	NA	NA	NA	G	G	C	G	T	A	CG	NA	NA
Triticum aestivum ssp. macha	Hexaploid	Macha	DV 1220	2	Georgia	NA	NA	NA	NA	NA	NA	NA	NA	NA	NA	NA	NA	NA	G	G	C	G	T	A	T-	NA	NA
Triticum aestivum ssp. macha	Hexaploid	Macha	DV 1226	2	Georgia	NA	NA	NA	NA	NA	NA	NA	NA	NA	NA	NA	NA	NA	G	G	C	G	T	A	T-	NA	NA
Triticum aestivum ssp. vavilovii	Hexaploid	Vavilov wheat	G529	2	Turkey	NA	NA	NA	NA	NA	NA	NA	NA	NA	NA	NA	NA	NA	G	G	C	G	T	A	T-	NA	NA
Triticum aestivum ssp. spelta	Hexaploid	Spelt	PI 520066	4	Mexico, Ciudad de México	NA	NA	NA	NA	NA	NA	NA	C	A	G	C	C	G	G	G	C	G	T	A	NA	G	C
Triticum aestivum ssp. spelta	Hexaploid	Spelt	PI 168680	4	United States, Washington	NA	NA	NA	NA	NA	NA	NA	C	A	G	C	C	G	G	G	C	G	T	A	NA	G	C
Triticum aestivum ssp. spelta	Hexaploid	Spelt	PI 15865	4	United States, Washington	NA	NA	NA	NA	NA	NA	NA	C	A	G	C	C	G	G	G	C	G	T	A	NA	G	C
Triticum aestivum ssp. spelta	Hexaploid	Spelt	PI 221419	4	Serbia	NA	NA	NA	NA	NA	NA	NA	C	A	G	C	C	G	G	G	C	G	T	A	NA	G	C
Triticum aestivum ssp. spelta	Hexaploid	Spelt	PI 348773	4	Spain, Asturias	NA	NA	NA	NA	NA	NA	NA	C	A	G	C	C	G	G	G	C	G	T	A	NA	G	C
Triticum aestivum ssp. spelta	Hexaploid	Spelt	PI 361768	4	Denmark	NA	NA	NA	NA	NA	NA	NA	C	A	G	C	C	G	G	G	C	G	T	A	NA	G	C
Triticum aestivum ssp. spelta	Hexaploid	Spelt	PI 361813	4	Denmark	NA	NA	NA	NA	NA	NA	NA	C	A	G	C	C	G	G	G	C	G	T	A	NA	G	C
Triticum aestivum ssp. spelta	Hexaploid	Spelt	PI 348303	4	Belgium	NA	NA	NA	NA	NA	NA	NA	C	A	G	C	C	G	G	G	C	G	T	A	NA	G	C
Triticum aestivum ssp. spelta	Hexaploid	Spelt	PI 348360	4	Belgium	NA	NA	NA	NA	NA	NA	NA	C	A	G	C	C	G	G	G	C	G	T	A	NA	G	C
Triticum aestivum ssp. spelta	Hexaploid	Spelt	PI 355704	4	England	NA	NA	NA	NA	NA	NA	NA	C	A	G	C	C	G	G	G	C	G	T	A	NA	G	C
Triticum aestivum ssp. spelta	Hexaploid	Spelt	PI 330558	4	England	NA	NA	NA	NA	NA	NA	NA	C	A	G	C	C	G	G	G	C	G	T	A	NA	G	C
Triticum aestivum ssp. spelta	Hexaploid	Spelt	PI 348141	4	Germany	NA	NA	NA	NA	NA	NA	NA	C	A	G	C	C	G	G	G	C	G	T	A	NA	G	C
Triticum aestivum ssp. spelta	Hexaploid	Spelt	PI 615267	4	Belgium	NA	NA	NA	NA	NA	NA	NA	C	A	G	C	C	G	G	G	C	G	T	A	NA	G	C
Triticum aestivum ssp. spelta	Hexaploid	Spelt	PI 225271	4	Iran, province unknown	NA	NA	NA	NA	NA	NA	NA	C	A	G	C	C	G	G	G	C	G	T	A	NA	G	C
Triticum aestivum ssp. macha	Hexaploid	Macha	PI 542466	4	United States, Oregon	NA	NA	NA	NA	NA	NA	NA	C	A	G	C	C	G	G	G	C	G	T	A	NA	G	C
Triticum aestivum ssp. macha	Hexaploid	Macha	PI 428146	4	Sweden	NA	NA	NA	NA	NA	NA	NA	C	A	G	C	C	G	G	G	C	G	T	A	NA	G	C
Triticum aestivum ssp. macha	Hexaploid	Macha	PI 572912	4	Georgia	NA	NA	NA	NA	NA	NA	NA	C	A	G	C	C	G	G	G	C	G	T	A	NA	G	C
Triticum aestivum ssp. macha	Hexaploid	Macha	PI 352466	4	Former Soviet Union	NA	NA	NA	NA	NA	NA	NA	C	A	G	C	C	G	G	G	C	G	T	A	NA	G	C
Triticum aestivum ssp. aestivum	Hexaploid	Landrace	Chinese Spring (Reference)	5	China, Sichuan	3	C	5	G	C	G	7	C	A	G	C	C	G	G	G	C	G	T	A	(CG, T-)	G	C
