# Supplementary material
Source: Research Square preprint supplement (doi:10.21203/rs.3.rs-9315249/v1)
Supplement: Supplementary file 11 [file d8f15b88bed3686f9ed8cfde.xlsx]

## Sheet: Sheet1
Supplementary Data 2. Statistical analyses. In the "Tukey test paired variable" (column H) colum: A indicates an A-subgenome mutation, B indicates a B-subgenome mutation, and WT indicates homozygosity for the wild-type allele. Mut indicates homozygosity for a mutant allele. Het indicates heterozygosity.
Test	Trait or tissue	H0 hypothesis	One- or two-tailed t-test	Family or population	Sample size (n)	df	Tukey test paired varieble	P value	t-value
T0:1 transgenic families t-test	Threshability (Fig. 2)	Transgenic-negative ≤ transgenic-positive values	One-tailed	FL1	13	11	NA	0.000843519	4.12476
				FL2	12	10	NA	0.068307	1.61855
				FL3	10	NA	NA	NA	NA
				FL4	11	NA	NA	NA	NA
				FL5	11	NA	NA	NA	NA
				FL6	11	NA	NA	NA	NA
				FL7	12	NA	NA	NA	NA
				FL8	12	10	NA	4.73586e-05	6.25272
				FL9	11	9	NA	0.0039796	3.39315
				PL	13	11	NA	4.72602e-07	9.75657
				Fielder	12	NA	NA	NA	NA
				All families	128	126	NA	1.82578e-23	12.2328
	Spike compactness (spike length (cm) per spikelet count) (Supplementary Fig. 5)	Transgenic-negative ≥ transgenic-positive values	One-tailed	FL1	13	11	NA	0.418789	-0.209907
				FL2	12	10	NA	0.224537	-0.787819
				FL3	10	NA	NA	NA	NA
				FL4	11	NA	NA	NA	NA
				FL5	11	NA	NA	NA	NA
				FL6	11	NA	NA	NA	NA
				FL7	12	NA	NA	NA	NA
				FL8	12	10	NA	0.0453993	-1.8714
				FL9	11	9	NA	0.00140119	-4.06935
				PL	13	11	NA	0.000736093	-4.20538
				Fielder	12	NA	NA	NA	NA
				All families	128	126	NA	3.88636e-16	-9.23873
	Heading date (Supplementary Fig. 6)	Transgenic-negative ≤ transgenic-positive values	One-tailed	FL1	13	11	NA	0.708542	-0.565756
				FL2	12	10	NA	0.628671	-0.33758
				FL3	10	NA	NA	NA	NA
				FL4	11	NA	NA	NA	NA
				FL5	11	NA	NA	NA	NA
				FL6	11	NA	NA	NA	NA
				FL7	12	NA	NA	NA	NA
				FL8	12	10	NA	0.586259	-0.223717
				FL9	11	9	NA	0.305122	0.528038
				PL	13	11	NA	0.673229	-0.461342
				Fielder	12	NA	NA	NA	NA
				All families	128	126	NA	0.00408004	2.68798
	Plant height (Supplementary Fig. 7)	Transgenic-negative ≥ transgenic-positive values	One-tailed	FL1	13	11	NA	0.182021	-0.94687
				FL2	12	10	NA	0.319209	-0.484571
				FL3	10	NA	NA	NA	NA
				FL4	11	NA	NA	NA	NA
				FL5	11	NA	NA	NA	NA
				FL6	11	NA	NA	NA	NA
				FL7	12	NA	NA	NA	NA
				FL8	12	10	NA	0.253427	-0.688402
				FL9	11	9	NA	0.843953	1.07089
				PL	13	11	NA	0.413814	-0.222992
				Fielder	12	NA	NA	NA	NA
				All families	128	126	NA	0.550692	0.127666
	Number of spikes per plant (Supplementary Fig. 8)	Transgenic-negative ≥ transgenic-positive values	One-tailed	FL1	13	11	NA	0.754635	0.712942
				FL2	12	10	NA	0.152521	-1.08108
				FL3	10	NA	NA	NA	NA
				FL4	11	NA	NA	NA	NA
				FL5	11	NA	NA	NA	NA
				FL6	11	NA	NA	NA	NA
				FL7	12	NA	NA	NA	NA
				FL8	12	10	NA	0.51254	0.0322346
				FL9	11	9	NA	0.451925	-0.124247
				PL	13	11	NA	0.401667	-0.255125
				Fielder	12	NA	NA	NA	NA
				All families	128	126	NA	0.645439	0.37388
Kronos mutant lines Tukey test	Threshability (Fig. 3)	No difference among the genotypes	NA	BC2F2 population for the A-subgenome nonsense mutation	39	36	A Het - A Mut	0.0404113	NA
							A Het - A WT	0.25234	NA
							A Mut - A WT	0.00521801	NA
				BC1F2 population for the B-subgenome nonsense mutation	38	35	B Het - B Mut	0.539857	NA
							B Het - B WT	0.862361	NA
							B Mut - B WT	0.786198	NA
				F2 population for the A- and B-subgenome double nonsense mutations grouped by the A-subgenome genotypes	24	21	A Het - A Mut	0.183518	NA
							A Het - A WT	0.999728	NA
							A Mut - A WT	0.3151	NA
				F2 population for the A- and B-subgenome double nonsense mutations grouped by the B-subgenome genotypes		21	B Het - B Mut	0.0015735	NA
							B Het - B WT	0.964411	NA
							B Mut - B WT	0.00334549	NA
	Spike compactness (spike length (cm) per spikelet count) (Supplementary Fig. 9)	No difference among the genotypes	NA	BC2F2 population for the A-subgenome nonsense mutation	40	37	A Het - A Mut	0.00139181	NA
							A Het - A WT	0.367151	NA
							A Mut - A WT	0.000276384	NA
				BC1F2 population for the B-subgenome nonsense mutation	38	35	B Het - B Mut	0.97006	NA
							B Het - B WT	0.804326	NA
							B Mut - B WT	0.793483	NA
				F2 population for the A- and B-subgenome double nonsense mutations grouped by the A-subgenome genotypes	24	21	A Het - A Mut	0.0540222	NA
							A Het - A WT	0.325346	NA
							A Mut - A WT	0.0101309	NA
				F2 population for the A- and B-subgenome double nonsense mutations grouped by the B-subgenome genotypes		21	B Het - B Mut	0.827016	NA
							B Het - B WT	0.736144	NA
							B Mut - B WT	0.488396	NA
	Plant height (Supplementary Fig. 10)	No difference among the genotypes	NA	BC2F2 population for the A-subgenome nonsense mutation	40	37	A Het - A Mut	0.968018	NA
							A Het - A WT	0.331411	NA
							A Mut - A WT	0.510292	NA
				BC1F2 population for the B-subgenome nonsense mutation	38	35	B Het - B Mut	0.00458264	NA
							B Het - B WT	0.724703	NA
							B Mut - B WT	0.00175247	NA
				F2 population for the A- and B-subgenome double nonsense mutations grouped by the A-subgenome genotypes	26	23	A Het - A Mut	0.0364306	NA
							A Het - A WT	0.998558	NA
							A Mut - A WT	0.0618514	NA
				F2 population for the A- and B-subgenome double nonsense mutations grouped by the B-subgenome genotypes		23	B Het - B Mut	0.00416969	NA
							B Het - B WT	0.880243	NA
							B Mut - B WT	0.0281672	NA
	Heading date (Supplementary Fig. 11)	No difference among the genotypes	NA	BC2F2 population for the A-subgenome nonsense mutation	40	37	A Het - A Mut	0.390503	NA
							A Het - A WT	0.611914	NA
							A Mut - A WT	0.179836	NA
				BC1F2 population for the B-subgenome nonsense mutation	38	35	B Het - B Mut	0.847552	NA
							B Het - B WT	0.629446	NA
							B Mut - B WT	0.492321	NA
				F2 population for the A- and B-subgenome double nonsense mutations grouped by the A-subgenome genotypes	26	23	A Het - A Mut	0.160854	NA
							A Het - A WT	0.48214	NA
							A Mut - A WT	0.726722	NA
				F2 population for the A- and B-subgenome double nonsense mutations grouped by the B-subgenome genotypes		23	B Het - B Mut	0.0702647	NA
							B Het - B WT	0.944558	NA
							B Mut - B WT	0.193776	NA
	Number of spikes per plant (Supplementary Fig. 12)	No difference among the genotypes	NA	BC2F2 population for the A-subgenome nonsense mutation	40	37	A Het - A Mut	0.965402	NA
							A Het - A WT	0.815791	NA
							A Mut - A WT	0.98855	NA
				BC1F2 population for the B-subgenome nonsense mutation	38	35	B Het - B Mut	0.524478	NA
							B Het - B WT	0.791028	NA
							B Mut - B WT	0.823322	NA
				F2 population for the A- and B-subgenome double nonsense mutations grouped by the A-subgenome genotypes	26	23	A Het - A Mut	0.503527	NA
							A Het - A WT	0.708182	NA
							A Mut - A WT	0.249803	NA
				F2 population for the A- and B-subgenome double nonsense mutations grouped by the B-subgenome genotypes		23	B Het - B Mut	0.909554	NA
							B Het - B WT	0.98948	NA
							B Mut - B WT	0.875307	NA
Quadratic contrast to analyze dominance	Threshability	Phenotypic value of heterozygous = 1/2 (phenotypic value of homozygous WT + phenotypic value of homozygous mutant)	NA	95 CS x DS2D2 F2s	95	92	NA	0.0997	NA
Transcript (qRT-PCR) levels t-test (Fig. 4)	Anthesis glume	No difference between CS and DS2D2	Two-tailed	NA	6	4	NA	0.400466	-0.939941
	Anthesis ovary				4	2		0.492357	-0.833267
	YA glume				6	4		0.0101806	4.58037
	Z32 spike				6	4		0.175989	1.64174
	Z32 stem				6	4		0.118125	1.98499
	Z36 spike				6	4		0.0357907	3.11234
PI 628252 Tukey test	Threshability	No difference among the genotypes	NA	Rollag BC1F1 population for Chr2ES	22	18	BC1F1 with 2ES - BC1F1 without 2ES	0.000839796	NA
							BC1F1 with 2ES - PI 628252	0.914346	NA
							BC1F1 with 2ES - Rollag	5.92733e-05	NA
							BC1F1 without 2ES - PI 628252	1.28385e-06	NA
							BC1F1 without 2ES - Rollag	0.430312	NA
							PI 628252 - Rollag	3.26945e-08	NA
				Washburn BC1F1 population for Chr2ES	18	14	BC1F1 with 2ES - BC1F1 without 2ES	0.0693643	NA
							BC1F1 with 2ES - PI 628252	0.743419	NA
							BC1F1 with 2ES - Washburn	0.00161174	NA
							BC1F1 without 2ES - PI 628252	0.0960432	NA
							BC1F1 without 2ES - Washburn	0.197967	NA
							PI 628252 - Washburn	0.000403127	NA
				Wheaton BC1F1 population for Chr2ES	15	12	BC1F1 with 2ES - BC1F1 without 2ES	0.0851214	NA
							BC1F1 with 2ES - PI 628252	0.983243	NA
							BC1F1 without 2ES - PI 628252	0.0246065	NA
